# Supplementary material for: On the variation of the belt and chiral screw and spring conformations of substituted regioregular HT undecathiophenes
Source: Royal Society of Chemistry journal article supplement (doi:10.1039/c7ra12777d), 2018-01-01
Supplement: c7ra12777d1.pdf [file c7ra12777d1.pdf]

Supplementary Information file to the article

**On variation of the belt and chiral screw and spring  
conformations of substituted regioregular HT  
undecathiophenes**

by Jan Cz. Dobrowolski\* and Małgorzata E. Jamróz

| Object               | Caption                                                                                                                                                                                                                                                                                                                                                                                                                                                                                                                                                                                                                                                                                                                                                                                                                                                                                | Page |
|----------------------|----------------------------------------------------------------------------------------------------------------------------------------------------------------------------------------------------------------------------------------------------------------------------------------------------------------------------------------------------------------------------------------------------------------------------------------------------------------------------------------------------------------------------------------------------------------------------------------------------------------------------------------------------------------------------------------------------------------------------------------------------------------------------------------------------------------------------------------------------------------------------------------|------|
| <b>Table 1ESI.</b>   | The B3LYP and LC- $\omega$ B97XD total energies and Gibbs free energy differences ( $\Delta E$ or $\Delta G_{298}$ , kcal/mol) for the S-shaped, C-shaped and P-planar dodecathiophenes calculated using 6-31G**, cc-pVTZ and cc-pVQZ basis sets (composed of 989, 2030, and 3789 basis functions, respectively). For B3LYP/6-31G** and B3LYP/cc-pVTZ calculations the role of Grimme's D3 correction for dispersion interactions was also checked. $\Delta EC$ and $\Delta G_{298,C}$ denote that the appropriate energies of the C conformer were subtracted. nc stands for not converged                                                                                                                                                                                                                                                                                            | 3    |
| <b>Table 2ESI.</b>   | Gibbs free energy and total energy (hartree) of the belt, screw and spring conformers of undecathiophenes and 3-substituted thiophenes calculated at the B3LYP/6-31G** level                                                                                                                                                                                                                                                                                                                                                                                                                                                                                                                                                                                                                                                                                                           | 4    |
| <b>Table 3ESI.</b>   | Gibbs free energy and total energy and energy of hyperhomodesmotic reaction (kcal/mol) for the belt, screw and spring conformers of undecathiophenes calculated at the B3LYP/6-31G** level. Gibbs free energy and total energy (hartree) of the 3-substituted thiophenes calculated at the B3LYP/6-31G** level.                                                                                                                                                                                                                                                                                                                                                                                                                                                                                                                                                                        | 5    |
| <b>Table 4ESI.</b>   | Four parameters applied to characterize the substituted belt, screw and spring conformers of undecathiophenes calculated at the B3LYP/6-31G** level. HOMA is the index calculated based on 43 CC bonds, 1st-last is the distance (in angstroms) between the first and 43rd C-atom, tau is the mean of the absolute values of all SCCS torsion angles, and $\Sigma(c=c)$ is the sum of all CC distances linking the thiophene rings (in angstroms).                                                                                                                                                                                                                                                                                                                                                                                                                                     | 6    |
| <b>Table 4A-ESI.</b> | The subsequent CC distances ( $\text{\AA}$ ) in the studied belt structures calculated at the B3LYP/6-31G** level                                                                                                                                                                                                                                                                                                                                                                                                                                                                                                                                                                                                                                                                                                                                                                      | 7    |
| <b>Table 4B-ESI.</b> | The subsequent CC distances ( $\text{\AA}$ ) in the studied screw structures calculated at the B3LYP/6-31G** level                                                                                                                                                                                                                                                                                                                                                                                                                                                                                                                                                                                                                                                                                                                                                                     | 10   |
| <b>Table 4C-ESI.</b> | The subsequent CC distances ( $\text{\AA}$ ) in the studied spring structures calculated at the B3LYP/6-31G** level                                                                                                                                                                                                                                                                                                                                                                                                                                                                                                                                                                                                                                                                                                                                                                    | 13   |
| <b>Table 5ESI.</b>   | Population of the $\sigma$ - and $\pi$ - valence orbitals in 3-substituted thiophenes and substituent effect descriptors based on the thiophene ring C-atoms based on NBO populations calculated from B3LYP/6-31G** optimized structures.                                                                                                                                                                                                                                                                                                                                                                                                                                                                                                                                                                                                                                              | 16   |
| <b>Table 6ESI.</b>   | Volume of 3-substituted thiophenes and pure substituents estimated based on cavity volume or surface calculated assuming the scrf=(iefpcm,solvent=water, read) key and PCMDoc PDens=1.0 as the "read" parameters using the single point at the 6-31G** calculations of the structures optimized in vacuum. Index "rel" means that unsubstituted and thiophene with abstracted hydrogen in position 3 was subtracted. $L_{\text{subst}}$ denotes length of the substituent from the ipso C-atom to the most distanced atom of the substituent or the position of the face defined by atoms as in $\text{CF}_3$ or $\text{CBr}_3$ groups. $W$ is the substituent width calculated from the cavity, and surface, assuming that the substituent volume is equal to the volume of a cylinder, or a cuboid or with one dimension equal to two radii of the bulkiest atom of the substituent. | 17   |
| <b>Table 7ESI.</b>   | Parameters of helix fitted using HELFIT program <sup>1</sup> based on coordinates of eleven S-atoms of each screw and spring conformers of the substituted undecathiophenes. The helix equation is expressed as follows: $x=a\cdot\cos(t)$ ; $y=a\cdot\sin(t)$ ; $z=b\cdot t$ , where $a$ is the helix radius and pitch is defined as $2\cdot\pi\cdot b$ , $a$ and pitch are in angstroms. Number of thiophene rings per turn is denoted as NTRT. Bond length alternation (BLA), defined as the difference between the average long and short C-C distances in the conjugated $\pi$ system.                                                                                                                                                                                                                                                                                            | 18   |
| <b>Fig. 1ESI.</b>    | Correlations between substituent effect descriptors sEDAT ( $a$ , $b$ ), pEDAT ( $c,d$ ) and ( $s+p$ )EDAT and HOMA index ( $a$ , $c$ , $e$ ) and averaged module of the torsion SCCS angle ( $b$ , $d$ , $f$ ) of the belt (black), screw (red) and spring (green) conformations of eleven substituted undecathiophenes                                                                                                                                                                                                                                                                                                                                                                                                                                                                                                                                                               | 19   |
| <b>Fig. 2ESI.</b>    | Correlations between the averaged module of the torsion SCCS angle and helix radius ( $a$ ) and helix pitch ( $b$ ) and between the helix radius and number of thiophene rings per turn NTRT ( $c$ ) for screw and spring undecathiophenes. Linear correlations between HOMA index and the bond length alternation BLA ( $d$ ). The spread of points have the same reasons as the spread of points in figures presented in the main text.                                                                                                                                                                                                                                                                                                                                                                                                                                              | 20   |
| <b>Coordinates</b>   | BELTS XYZ                                                                                                                                                                                                                                                                                                                                                                                                                                                                                                                                                                                                                                                                                                                                                                                                                                                                              | 21   |
| <b>Coordinates</b>   | SCREWS XYZ                                                                                                                                                                                                                                                                                                                                                                                                                                                                                                                                                                                                                                                                                                                                                                                                                                                                             | 93   |
| <b>Coordinates</b>   | SPRINGS XYZ                                                                                                                                                                                                                                                                                                                                                                                                                                                                                                                                                                                                                                                                                                                                                                                                                                                                            | 141  |

**Table 1ESI.** The B3LYP and LC- $\omega$ B97XD total energies and Gibbs free energy differences ( $\Delta E$  or  $\Delta G_{298}$ , kcal/mol) for the S-shaped, C-shaped and P-planar dodecathiophenes calculated using 6-31G\*\*, cc-pVTZ and cc-pVQZ basis sets (composed of 989, 2030, and 3789 basis functions, respectively). For B3LYP/6-31G\*\* and B3LYP/cc-pVTZ calculations the role of Grimme's D3 correction for dispersion interactions was also checked.  $\Delta E_C$  and  $\Delta G_{298,C}$  denote that the appropriate energies of the C conformer were subtracted. nc stands for not converged

| System |    | B3LYP            |                    |                   |                    |                   | LC- $\omega$ B97XD |                    |                   |                    |                   |
|--------|----|------------------|--------------------|-------------------|--------------------|-------------------|--------------------|--------------------|-------------------|--------------------|-------------------|
|        |    | 6-31G**<br>(989) |                    | cc-pVTZ<br>(2030) |                    | cc-pVQZ<br>(3789) | 6-31G**<br>(989)   |                    | cc-pVTZ<br>(2030) |                    | cc-pVQZ<br>(3789) |
|        |    | $\Delta E_C$     | $\Delta G_{298,C}$ | $\Delta E_C$      | $\Delta G_{298,C}$ | $\Delta E_C$      | $\Delta E_C$       | $\Delta G_{298,C}$ | $\Delta E_C$      | $\Delta G_{298,C}$ | $\Delta E_C$      |
| S      |    | 0.038            | -2.260             | 0.001             | -0.016             | 0.003             | -0.038             | -0.334             | 0.051             | 0.741              | -0.065            |
| C      |    | 0.000            | 0.000              | 0.000             | 0.000              | 0.000             | 0.000              | 0.000              | 0.000             | 0.000              | 0.000             |
| P      |    | 0.140            | 5.412              | 0.019             | 3.368              | 0.053             | 2.081              | 12.961             | 1.351             | nc                 | 1.498             |
| S      | D3 | 0.059            | -0.465             | 0.013             | -1.037             |                   |                    |                    |                   |                    |                   |
| C      |    | 0.000            | 0.000              | 0.000             | 0.000              |                   |                    |                    |                   |                    |                   |
| P      |    | 0.292            | 5.737              | 0.082             | 1.189              |                   |                    |                    |                   |                    |                   |

**Table 2ESI.** Gibbs free energy and total energy (hartree) of the belt, screw and spring conformers of undecathiophenes and 3-substituted thiophenes calculated at the B3LYP/6-31G\*\* level

| Subst            | belt           |                | screw          |                | spring         |                |                  | 3-substituted-thiophene |               |
|------------------|----------------|----------------|----------------|----------------|----------------|----------------|------------------|-------------------------|---------------|
|                  | $\Delta G$     | $\Delta E$     | $\Delta G$     | $\Delta E$     | $\Delta G$     | $\Delta E$     |                  | $\Delta G$              | $\Delta E$    |
| BF <sub>2</sub>  | -8535.5480870  | -8535.9360783  | -8535.5459310  | -8535.9327523  | -8535.5448200  | -8535.9364377  | BF <sub>2</sub>  | -777.0534730            | -777.0881418  |
| BH <sub>2</sub>  | -6350.5271780  | -6351.0765442  | -6350.5251570  | -6351.0734292  | -6350.5220960  | -6351.072251   | BH <sub>2</sub>  | -578.4132970            | -578.4622941  |
| Br               | -34353.0002650 | -34353.2948990 |                |                | -34352.9819360 | -34353.27996   | Br               | -3124.0896280           | -3124.1158144 |
| CBr <sub>3</sub> | -91349.5206880 | -91349.8223856 | -91349.5186010 | -91349.8202268 | -91349.5256800 | -91349.82092   | CBr <sub>3</sub> | -8305.6098710           | -8305.6350900 |
| CCH              | -6908.2746460  | -6908.7805500  |                |                | -6908.2695160  | -6908.773595   | CCH              | -629.1144160            | -629.1599574  |
| CCl <sub>3</sub> | -21669.5596600 | -21669.9090831 | -21669.5592060 | -21669.9074551 | -21669.5568600 | -21669.90778   | CCl <sub>3</sub> | -1971.0685280           | -1971.0986725 |
| CF <sub>3</sub>  | -9778.0955560  | -9778.5334639  | -9778.0947430  | -9778.5307904  | -9778.0950520  | -9778.534968   | CF <sub>3</sub>  | -890.0149860            | -890.0526552  |
| CH <sub>3</sub>  | -6502.9836040  | -6503.7054537  |                | -6503.7052797  | -6502.9747840  | -6503.70089    | CH <sub>3</sub>  | -592.2716740            | -592.3365891  |
| CHO              | -7317.1965550  | -7317.7096827  | -7317.1960230  | -7317.7186540  | -7317.2106980  | -7317.722105   | CHO              | -666.2943600            | -666.3402677  |
| Cl               | -11126.3623440 | -11126.6705674 |                |                | -11126.3513580 | -11126.66383   | Cl               | -1012.5785150           | -1012.6062667 |
| CN               | -7085.4176990  | -7085.809503   |                |                | -7085.4121110  | -7085.804476   | CN               | -645.2204810            | -645.2559164  |
| COOH             | -8144.9065230  | -8145.462681   | -8144.9226660  | -8145.4841384  | -8144.9161230  | -8145.476469   | COOH             | -741.5442350            | -741.5944736  |
| F                | -7162.3510040  | -7162.690718   |                |                | -7162.3472060  | -7162.67995    | F                | -652.2087780            | -652.2388880  |
| H                | -6070.7582050  | -6071.193693   |                |                | -6070.7419900  | -6071.178945   | H                | -552.9730920            | -553.0125893  |
| <i>i</i> Pr      | -7367.3380120  | -7368.649262   | -7367.3391580  | -7368.6487730  | -7367.3320880  | -7368.647787   | <i>i</i> Pr      | -670.8579020            | -670.9763847  |
| Li               | -6146.9336200  | -6147.2444284  | -6146.9360230  | -6147.2480919  | -6146.9267430  | -6147.239798   | Li               | -559.8848060            | -559.9112166  |
| <i>n</i> Bu      | -7799.5318800  | -7801.1317538  | -7799.5413470  | -7801.1339014  | -7799.5360690  | -7801.132937   | <i>n</i> Bu      | -710.1503170            | -710.2946631  |
| NH <sub>2</sub>  | -6679.4957700  | -6680.1080085  | -6679.4924130  | -6680.1026437  | -6679.4879410  | -6680.103471   | NH <sub>2</sub>  | -608.3141800            | -608.3687223  |
| NMe <sub>2</sub> | -7543.6809460  | -7544.8587845  |                |                | -7543.6488970  | -7544.841367   | NMe <sub>2</sub> | -686.8858760            | -686.9931638  |
| NO <sub>2</sub>  | -8320.1538540  | -8320.5823314  | -8320.1549810  | -8320.5819176  | -8320.1321000  | -8320.554414   | NO <sub>2</sub>  | -757.4755720            | -757.5136943  |
| OH               | -6898.1069530  | -6898.5831067  | -6898.1068340  | -6898.5832095  | -6898.0975230  | -6898.563847   | OH               | -628.1870670            | -628.2292842  |
| OMe              | -7330.1718260  | -7330.934451   |                |                | -7330.1621090  | -7330.91896    | OMe              | -667.4677450            | -667.5391982  |
| Ph               | -8611.5948130  | -8612.8521383  | -8611.5963010  | -8612.8501504  | -8611.5913100  | -8612.84877    | Ph               | -783.9734500            | -784.0871025  |
| SH               | -10450.8153390 | -10451.2100589 | -10450.8169170 | -10451.2111114 | -10450.8103970 | -10451.21138   | SH               | -951.1660680            | -951.2015018  |
| SiH <sub>3</sub> | -9268.2753050  | -9268.848469   | -9268.2749990  | -9268.8452129  | -9268.2717300  | -9268.8481234  | SiH <sub>3</sub> | -843.6647770            | -843.7155198  |
| SMe              | -10883.0018570 | -10883.7029210 | -10883.0041940 | -10883.7048198 | -10882.9972060 | -10883.6948447 | SMe              | -990.4584180            | -990.5210681  |
| <i>t</i> Bu      | -7799.4289830  | -7801.0399397  | -7799.4298360  | -7801.0413442  | -7799.4324640  | -7801.039914   | <i>t</i> Bu      | -710.1498150            | -710.2949276  |

**Table 3ESI.** Gibbs free energy and total energy and energy of hyperhomodesmotic reaction (kcal/mol) for the belt, screw and spring conformers of undecathiophenes calculated at the B3LYP/6-31G\*\* level. Gibbs free energy and total energy (hartree) of the 3-substituted thiophenes calculated at the B3LYP/6-31G\*\* level.

| Substituent      | Energy difference with respect to belt |            |            |            |            |            | hyperhomodesmotic |            |            |            |            |            |
|------------------|----------------------------------------|------------|------------|------------|------------|------------|-------------------|------------|------------|------------|------------|------------|
|                  | belt                                   |            | screw      |            | spring     |            | belt              |            | screw      |            | spring     |            |
|                  | $\Delta G$                             | $\Delta E$ | $\Delta G$ | $\Delta E$ | $\Delta G$ | $\Delta E$ | $\Delta G$        | $\Delta E$ | $\Delta G$ | $\Delta E$ | $\Delta G$ | $\Delta E$ |
| BF <sub>2</sub>  | 0.0                                    | 0.0        | 1.4        | 2.1        | 2.1        | -0.2       | 59.2              | 55.7       | 60.5       | 57.7       | 61.2       | 55.4       |
| BH <sub>2</sub>  | 0.0                                    | 0.0        | 1.3        | 2.0        | 3.2        | 2.7        | 46.0              | 40.1       | 47.3       | 42.1       | 49.2       | 42.8       |
| Br               | 0.0                                    | 0.0        | → b        |            | 11.5       | 9.4        | 25.0              | 21.5       |            |            | 36.5       | 30.9       |
| CBr <sub>3</sub> | 0.0                                    | 0.0        | 1.3        | 1.4        | -3.1       | 0.9        | 151.9             | 137.3      | 153.2      | 138.7      | 148.8      | 138.2      |
| CCH              | 0.0                                    | 0.0        | → b        |            | 3.2        | 4.4        | 23.9              | 21.5       |            |            | 27.1       | 25.8       |
| CCl <sub>3</sub> | 0.0                                    | 0.0        | 0.3        | 1.0        | 1.8        | 0.8        | 155.8             | 145.3      | 156.1      | 146.3      | 157.6      | 146.1      |
| CF <sub>3</sub>  | 0.0                                    | 0.0        | 0.5        | 1.7        | 0.3        | -0.9       | 77.5              | 63.3       | 78.0       | 65.0       | 77.8       | 62.4       |
| CH <sub>3</sub>  | 0.0                                    | 0.0        | → b        | 0.1        | 5.5        | 2.9        | 37.0              | 32.8       |            |            | 42.6       | 35.6       |
| CHO              | 0.0                                    | 0.0        | 0.3        | -5.6       | -8.9       | -7.8       | 60.0              | 55.5       | 60.3       | 49.9       | 51.1       | 47.7       |
| Cl               | 0.0                                    | 0.0        | → b        |            | 6.9        | 4.2        | 34.8              | 33.6       |            |            | 41.7       | 37.8       |
| CN               | 0.0                                    | 0.0        | → b        |            | 3.5        | 3.2        | 38.8              | 38.1       |            |            | 42.3       | 41.3       |
| COOH             | 0.0                                    | 0.0        | -10.1      | -13.5      | -6.0       | -8.7       | 84.2              | 82.7       | 74.1       | 69.2       | 78.2       | 74.0       |
| F                | 0.0                                    | 0.0        | → b        |            | 2.4        | 6.8        | -0.2              | -4.9       |            |            | 2.2        | 1.9        |
| H                | 0.0                                    | 0.0        | → b        |            | 10.2       | 9.3        | 0.0               | 0.0        |            |            | 10.2       | 9.3        |
| <i>i</i> Pr      | 0.0                                    | 0.0        | -0.7       | 0.3        | 3.7        | 0.9        | 96.1              | 91.7       | 95.4       | 92.0       | 99.8       | 92.7       |
| Li               | 0.0                                    | 0.0        | -1.5       | -2.3       | 4.3        | 2.9        | -92.0             | -104.1     | -93.5      | -106.4     | -87.7      | -101.2     |
| <i>n</i> Bu      | 0.0                                    | 0.0        | -5.9       | -1.3       | -2.6       | -0.7       | 110.3             | 103.4      | 104.4      | 102.0      | 107.7      | 102.6      |
| NH <sub>2</sub>  | 0.0                                    | 0.0        | 2.1        | 3.4        | 4.9        | 2.8        | 9.0               | 2.0        | 11.1       | 5.3        | 14.0       | 4.8        |
| NMe <sub>2</sub> | 0.0                                    | 0.0        | → b        |            | 20.1       | 10.9       | 74.0              | 76.1       |            |            | 94.1       | 87.0       |
| NO <sub>2</sub>  | 0.0                                    | 0.0        | -0.7       | 0.3        | 13.7       | 17.5       | 82.6              | 77.5       | 81.9       | 77.8       | 96.3       | 95.0       |
| OH               | 0.0                                    | 0.0        | 0.1        | -0.1       | 5.9        | 12.1       | 3.1               | -3.6       | 3.2        | -3.7       | 9.0        | 8.5        |
| OMe              | 0.0                                    | 0.0        | → b        |            | 6.1        | 9.7        | 17.3              | 32.6       |            |            | 23.4       | 42.3       |
| Ph               | 0.0                                    | 0.0        | -0.9       | 1.2        | 2.2        | 2.1        | 105.0             | 101.2      | 104.1      | 102.4      | 107.2      | 103.3      |
| SH               | 0.0                                    | 0.0        | -1.0       | -0.7       | 3.1        | -0.8       | 41.2              | 38.7       | 40.2       | 38.0       | 44.3       | 37.9       |
| SiH <sub>3</sub> | 0.0                                    | 0.0        | 0.2        | 2.0        | 2.2        | 0.2        | 57.4              | 48.6       | 57.6       | 50.7       | 59.6       | 48.8       |
| SMe              | 0.0                                    | 0.0        | -1.5       | -1.2       | 2.9        | 5.1        | 59.6              | 52.7       | 58.1       | 51.5       | 62.5       | 57.8       |
| <i>t</i> Bu      | 0.0                                    | 0.0        | -0.5       | -0.9       | -2.2       | 0.0        | 171.4             | 162.8      | 170.9      | 161.9      | 169.2      | 162.8      |

**Table 4ESI.** Four parameters applied to characterize the substituted belt, screw and spring conformers of undecathiophenes calculated at the B3LYP/6-31G\*\* level. HOMA is the index calculated based on 43 CC bonds, 1<sup>st</sup>-last is the distance (in angstroms) between the first and 43rd C-atom, tau is the mean of the absolute values of all SCCS torsion angles, and  $\Sigma(c=c)$  is the sum of all CC distances linking the thiophene rings (in angstroms).

| Substituent      | belt  |                       |       |               | screw |                       |       |               | spring |                       |      |               |
|------------------|-------|-----------------------|-------|---------------|-------|-----------------------|-------|---------------|--------|-----------------------|------|---------------|
|                  | HOMA  | 1 <sup>st</sup> -last | tau   | $\Sigma(c=c)$ | HOMA  | 1 <sup>st</sup> -last | tau   | $\Sigma(c=c)$ | HOMA   | 1 <sup>st</sup> -last | tau  | $\Sigma(c=c)$ |
| BF <sub>2</sub>  | 0.688 | 32.5                  | 137.1 | 14.55         | 0.671 | 41.34                 | 137.1 | 16.03         | 0.694  | 30.64                 | 32.9 | 15.98         |
| BH <sub>2</sub>  | 0.704 | 35.4                  | 144.8 | 14.50         | 0.691 | 41.46                 | 145.5 | 15.96         | 0.693  | 32.08                 | 35.4 | 15.94         |
| Br               | 0.808 | 41.9                  | 179.3 | 14.44         |       |                       |       |               | 0.776  | 25.02                 | 23.7 | 15.92         |
| CBR <sub>3</sub> | 0.661 | 29.1                  | 127.6 | 14.60         | 0.639 | 41.06                 | 125.4 | 16.08         | 0.673  | 34.31                 | 45.9 | 16.01         |
| CCH              | 0.789 | 41.8                  | 180.0 | 14.43         |       |                       |       |               | 0.770  | 17.25                 | 14.9 | 15.88         |
| CCl <sub>3</sub> | 0.639 | 25.9                  | 122.2 | 14.62         | 0.619 | 40.41                 | 119.7 | 16.10         | 0.617  | 36.32                 | 55.6 | 16.09         |
| CF <sub>3</sub>  | 0.742 | 37.7                  | 143.0 | 14.53         | 0.724 | 40.87                 | 141.5 | 16.01         | 0.743  | 29.91                 | 31.5 | 15.97         |
| CH <sub>3</sub>  | 0.791 | 40.8                  | 161.4 | 14.46         |       |                       |       |               | 0.732  | 31.21                 | 33.2 | 15.96         |
| CHO              | 0.715 | 34.8                  | 140.0 | 14.53         | 0.774 | 41.67                 | 169.6 | 15.93         | 0.785  | 6.42                  | 5.8  | 15.87         |
| Cl               | 0.809 | 41.8                  | 176.6 | 14.44         |       |                       |       |               | 0.769  | 27.44                 | 26.8 | 15.92         |
| CN               | 0.795 | 41.7                  | 177.3 | 14.44         |       |                       |       |               | 0.782  | 17.98                 | 15.4 | 15.89         |
| COOH             | 0.671 | 27.4                  | 130.3 | 14.59         | 0.733 | 41.69                 | 156.2 | 15.99         | 0.721  | 17.54                 | 26.7 | 15.97         |
| F                | 0.845 | 41.8                  | 180.0 | 14.38         |       |                       |       |               | 0.850  | 9.29                  | 38.7 | 15.82         |
| H                | 0.810 | 41.4                  | 166.3 | 14.43         |       |                       |       |               | 0.792  | 24.86                 | 0.9  | 15.91         |
| <i>i</i> Pr      | 0.693 | 35.1                  | 138.8 | 14.55         | 0.674 | 41.46                 | 136.8 | 16.02         | 0.668  | 34.75                 | 22.5 | 16.02         |
| Li               | 0.705 | 41.8                  | 151.6 | 14.48         | 0.684 | 41.78                 | 155.9 | 15.94         | 0.613  | 37.68                 | 43.6 | 16.10         |
| <i>n</i> Bu      | 0.758 | 39.3                  | 151.5 | 14.49         | 0.669 | 41.44                 | 135.2 | 16.03         | 0.662  | 35.36                 | 49.6 | 16.03         |
| NH <sub>2</sub>  | 0.819 | 41.0                  | 157.5 | 14.38         | 0.783 | 41.59                 | 152.0 | 15.85         | 0.784  | 30.69                 | 45.9 | 15.87         |
| NMe <sub>2</sub> | 0.792 | 41.6                  | 177.3 | 14.42         | 0.790 | 41.64                 | 177.4 | 15.87         | 0.781  | 22.06                 | 20.9 | 15.89         |
| NO <sub>2</sub>  | 0.763 | 42.6                  | 154.2 | 14.53         | 0.755 | 41.68                 | 152.6 | 15.99         | 0.718  | 30.79                 | 30.7 | 16.00         |
| OH               | 0.804 | 43.6                  | 150.9 | 14.41         | 0.798 | 41.73                 | 153.1 | 15.85         | 0.853  | 7.37                  | 34.2 | 15.80         |
| OMe              | 0.865 | 44.6                  | 180.0 | 14.35         |       |                       |       |               | 0.857  | 6.41                  | 2.2  | 15.79         |
| Ph               | 0.697 | 45.6                  | 136.6 | 14.55         | 0.685 | 41.34                 | 136.5 | 16.01         | 0.693  | 32.69                 | 1.2  | 16.00         |
| SH               | 0.787 | 40.06                 | 161.3 | 14.46         | 0.781 | 41.73                 | 159.8 | 15.91         | 0.750  | 30.99                 | 32.2 | 15.92         |
| SiH <sub>3</sub> | 0.727 | 38.11                 | 145.3 | 14.51         | 0.708 | 41.50                 | 145.3 | 15.98         | 0.697  | 33.16                 | 37.6 | 15.99         |
| SMe              | 0.781 | 41.24                 | 167.9 | 14.47         | 0.774 | 41.78                 | 165.2 | 15.92         | 0.731  | 30.05                 | 31.3 | 15.94         |
| <i>t</i> Bu      | 0.551 | 20.00                 | 108.7 | 14.69         | 0.543 | 40.66                 | 107.6 | 16.16         | 0.520  | 38.90                 | 75.2 | 16.18         |

**Table 4A-ESI.** The subsequent CC distances (Å) in the studied belt structures calculated at the B3LYP/6-31G\*\* level

| BF <sub>2</sub> | BH <sub>2</sub> | Br      | CBr <sub>3</sub> | CCH     | CCl <sub>3</sub> | CF <sub>3</sub> | CH <sub>3</sub> | CHO     | Cl      | CN      | COOH    | F       | H       |
|-----------------|-----------------|---------|------------------|---------|------------------|-----------------|-----------------|---------|---------|---------|---------|---------|---------|
| 1.38065         | 1.38859         | 1.36305 | 1.36273          | 1.37994 | 1.36345          | 1.36908         | 1.37017         | 1.37702 | 1.36649 | 1.37975 | 1.37585 | 1.36619 | 1.36770 |
| 1.43063         | 1.43541         | 1.42390 | 1.43416          | 1.42950 | 1.43287          | 1.42293         | 1.42825         | 1.42755 | 1.41917 | 1.42588 | 1.42598 | 1.41722 | 1.42285 |
| 1.37698         | 1.37636         | 1.38156 | 1.39241          | 1.37992 | 1.38993          | 1.37742         | 1.37951         | 1.37419 | 1.38095 | 1.38007 | 1.37458 | 1.37784 | 1.37936 |
| 1.45723         | 1.45201         | 1.44729 | 1.46109          | 1.44605 | 1.46308          | 1.45597         | 1.45045         | 1.45466 | 1.44806 | 1.44706 | 1.46024 | 1.44137 | 1.44677 |
| 1.39559         | 1.40582         | 1.37941 | 1.37410          | 1.39674 | 1.37367          | 1.38624         | 1.38786         | 1.39239 | 1.38241 | 1.39641 | 1.39194 | 1.38030 | 1.37985 |
| 1.42881         | 1.43192         | 1.41211 | 1.42640          | 1.42442 | 1.42651          | 1.41712         | 1.42007         | 1.42435 | 1.41335 | 1.42106 | 1.42457 | 1.40786 | 1.41505 |
| 1.37716         | 1.37681         | 1.38235 | 1.39419          | 1.37859 | 1.39106          | 1.37943         | 1.38158         | 1.37409 | 1.38068 | 1.37902 | 1.37423 | 1.37897 | 1.38101 |
| 1.45480         | 1.44919         | 1.44361 | 1.45971          | 1.44226 | 1.46221          | 1.45301         | 1.44574         | 1.45248 | 1.44386 | 1.44341 | 1.45873 | 1.43726 | 1.44251 |
| 1.39674         | 1.40731         | 1.38109 | 1.37571          | 1.39806 | 1.37459          | 1.38800         | 1.39026         | 1.39348 | 1.38424 | 1.39771 | 1.39293 | 1.38213 | 1.38151 |
| 1.42875         | 1.43152         | 1.41113 | 1.42540          | 1.42351 | 1.42583          | 1.41650         | 1.41832         | 1.42397 | 1.41210 | 1.42019 | 1.42428 | 1.40673 | 1.41364 |
| 1.37681         | 1.37682         | 1.38302 | 1.39451          | 1.37919 | 1.39115          | 1.37962         | 1.38246         | 1.37412 | 1.38100 | 1.37942 | 1.37428 | 1.37973 | 1.38174 |
| 1.45476         | 1.44867         | 1.44295 | 1.45930          | 1.44169 | 1.46197          | 1.45252         | 1.44429         | 1.45210 | 1.44294 | 1.44293 | 1.45838 | 1.43636 | 1.44157 |
| 1.39660         | 1.40752         | 1.38140 | 1.37596          | 1.39831 | 1.37466          | 1.38837         | 1.39117         | 1.39367 | 1.38464 | 1.39794 | 1.39306 | 1.38256 | 1.38192 |
| 1.42844         | 1.43153         | 1.41076 | 1.42521          | 1.42323 | 1.42586          | 1.41632         | 1.41771         | 1.42390 | 1.41176 | 1.41994 | 1.42448 | 1.40635 | 1.41327 |
| 1.37728         | 1.37681         | 1.38320 | 1.39431          | 1.37937 | 1.39132          | 1.37963         | 1.38249         | 1.37421 | 1.38129 | 1.37955 | 1.37397 | 1.37991 | 1.38198 |
| 1.45464         | 1.44870         | 1.44278 | 1.45947          | 1.44157 | 1.46186          | 1.45247         | 1.44399         | 1.45206 | 1.44269 | 1.44289 | 1.45857 | 1.43610 | 1.44128 |
| 1.39687         | 1.40754         | 1.38150 | 1.37561          | 1.39834 | 1.37483          | 1.38827         | 1.39117         | 1.39375 | 1.38478 | 1.39792 | 1.39282 | 1.38268 | 1.38204 |
| 1.42877         | 1.43141         | 1.41081 | 1.42562          | 1.42319 | 1.42581          | 1.41651         | 1.41752         | 1.42384 | 1.41158 | 1.41991 | 1.42426 | 1.40635 | 1.41307 |
| 1.37683         | 1.37688         | 1.38320 | 1.39442          | 1.37944 | 1.39143          | 1.37959         | 1.38288         | 1.37414 | 1.38140 | 1.37962 | 1.37431 | 1.37992 | 1.38207 |
| 1.45480         | 1.44864         | 1.44275 | 1.45939          | 1.44155 | 1.46184          | 1.45267         | 1.44371         | 1.45206 | 1.44259 | 1.44294 | 1.45844 | 1.43602 | 1.44118 |
| 1.39654         | 1.40758         | 1.38147 | 1.37584          | 1.39834 | 1.37492          | 1.38822         | 1.39160         | 1.39367 | 1.38481 | 1.39787 | 1.39299 | 1.38267 | 1.38208 |
| 1.42850         | 1.43158         | 1.41075 | 1.42520          | 1.42314 | 1.42556          | 1.41629         | 1.41761         | 1.42394 | 1.41151 | 1.41988 | 1.42435 | 1.40634 | 1.41306 |
| 1.37721         | 1.37676         | 1.38320 | 1.39407          | 1.37946 | 1.39113          | 1.37967         | 1.38234         | 1.37421 | 1.38147 | 1.37964 | 1.37419 | 1.37989 | 1.38208 |
| 1.45474         | 1.44874         | 1.44275 | 1.45955          | 1.44156 | 1.46192          | 1.45268         | 1.44415         | 1.45209 | 1.44257 | 1.44300 | 1.45842 | 1.43606 | 1.44118 |
| 1.39674         | 1.40746         | 1.38142 | 1.37548          | 1.39832 | 1.37469          | 1.38822         | 1.39099         | 1.39373 | 1.38484 | 1.39779 | 1.39293 | 1.38259 | 1.38207 |
| 1.42887         | 1.43151         | 1.41086 | 1.42566          | 1.42317 | 1.42593          | 1.41672         | 1.41775         | 1.42398 | 1.41151 | 1.41993 | 1.42426 | 1.40647 | 1.41307 |
| 1.37679         | 1.37679         | 1.38316 | 1.39441          | 1.37946 | 1.39131          | 1.37945         | 1.38275         | 1.37400 | 1.38148 | 1.37965 | 1.37421 | 1.37981 | 1.38204 |
| 1.45495         | 1.44884         | 1.44281 | 1.45940          | 1.44159 | 1.46184          | 1.45279         | 1.44411         | 1.45232 | 1.44260 | 1.44307 | 1.45848 | 1.43618 | 1.44128 |
| 1.39641         | 1.40743         | 1.38130 | 1.37591          | 1.39828 | 1.37472          | 1.38794         | 1.39125         | 1.39351 | 1.38481 | 1.39768 | 1.39287 | 1.38242 | 1.38198 |
| 1.42853         | 1.43175         | 1.41094 | 1.42544          | 1.42320 | 1.42571          | 1.41640         | 1.41792         | 1.42411 | 1.41151 | 1.42000 | 1.42458 | 1.40665 | 1.41327 |
| 1.37715         | 1.37668         | 1.38308 | 1.39402          | 1.37939 | 1.39130          | 1.37944         | 1.38225         | 1.37416 | 1.38141 | 1.37958 | 1.37398 | 1.37964 | 1.38192 |
| 1.45488         | 1.44901         | 1.44299 | 1.45954          | 1.44174 | 1.46192          | 1.45290         | 1.44454         | 1.45235 | 1.44277 | 1.44322 | 1.45860 | 1.43652 | 1.44157 |
| 1.39654         | 1.40718         | 1.38102 | 1.37532          | 1.39811 | 1.37465          | 1.38772         | 1.39071         | 1.39353 | 1.38466 | 1.39737 | 1.39268 | 1.38203 | 1.38174 |

|             |         |             |                 |                  |                 |         |         |         |         |                  |         |             |         |
|-------------|---------|-------------|-----------------|------------------|-----------------|---------|---------|---------|---------|------------------|---------|-------------|---------|
| 1.42912     | 1.43213 | 1.41130     | 1.42575         | 1.42348          | 1.42592         | 1.41690 | 1.41825 | 1.42441 | 1.41183 | 1.42039          | 1.42460 | 1.40717     | 1.41364 |
| 1.37651     | 1.37636 | 1.38277     | 1.39468         | 1.37908          | 1.39115         | 1.37932 | 1.38206 | 1.37386 | 1.38109 | 1.37928          | 1.37392 | 1.37918     | 1.38151 |
| 1.45543     | 1.44964 | 1.44365     | 1.45951         | 1.44234          | 1.46205         | 1.45331 | 1.44560 | 1.45292 | 1.44343 | 1.44376          | 1.45895 | 1.43752     | 1.44251 |
| 1.39598     | 1.40683 | 1.38021     | 1.37608         | 1.39735          | 1.37464         | 1.38755 | 1.39024 | 1.39325 | 1.38393 | 1.39639          | 1.39241 | 1.38105     | 1.38101 |
| 1.42983     | 1.43303 | 1.41242     | 1.42547         | 1.42468          | 1.42620         | 1.41780 | 1.42017 | 1.42516 | 1.41284 | 1.42163          | 1.42557 | 1.40865     | 1.41505 |
| 1.37555     | 1.37503 | 1.38142     | 1.39318         | 1.37738          | 1.39060         | 1.37792 | 1.37957 | 1.37291 | 1.37943 | 1.37758          | 1.37279 | 1.37742     | 1.37985 |
| 1.45731     | 1.45198 | 1.44755     | 1.46158         | 1.44576          | 1.46336         | 1.45550 | 1.45020 | 1.45487 | 1.44703 | 1.44715          | 1.46022 | 1.44200     | 1.44677 |
| 1.39352     | 1.40384 | 1.38181     | 1.37262         | 1.39552          | 1.37239         | 1.38534 | 1.38707 | 1.39225 | 1.38293 | 1.39453          | 1.39062 | 1.37948     | 1.37936 |
| 1.43772     | 1.44262 | 1.41746     | 1.43078         | 1.43716          | 1.43009         | 1.42615 | 1.42998 | 1.43218 | 1.42434 | 1.43327          | 1.43218 | 1.41736     | 1.42285 |
| 1.36294     | 1.36057 | 1.36494     | 1.37176         | 1.36042          | 1.37101         | 1.36518 | 1.36540 | 1.36101 | 1.36310 | 1.36138          | 1.36141 | 1.36419     | 1.36770 |
|             |         |             |                 |                  |                 |         |         |         |         |                  |         |             |         |
|             |         |             |                 |                  |                 |         |         |         |         |                  |         |             |         |
| <i>i</i> Pr | Li      | <i>n</i> Bu | NH <sub>2</sub> | NMe <sub>2</sub> | NO <sub>2</sub> | OH      | OMe     | Ph      | SH      | SiH <sub>3</sub> | SMe     | <i>t</i> Bu |         |
| 1.37115     | 1.36999 | 1.37047     | 1.37332         | 1.37796          | 1.37174         | 1.37063 | 1.36671 | 1.37661 | 1.36971 | 1.37585          | 1.36286 | 1.36510     |         |
| 1.43143     | 1.44858 | 1.43091     | 1.43063         | 1.43336          | 1.41312         | 1.42749 | 1.42812 | 1.43271 | 1.42743 | 1.43258          | 1.43134 | 1.43734     |         |
| 1.37629     | 1.37520 | 1.37683     | 1.37886         | 1.37760          | 1.38290         | 1.37460 | 1.38907 | 1.37595 | 1.37780 | 1.37797          | 1.38944 | 1.38763     |         |
| 1.45779     | 1.45120 | 1.45732     | 1.44287         | 1.44657          | 1.45453         | 1.44503 | 1.43969 | 1.45721 | 1.45157 | 1.45418          | 1.45010 | 1.46928     |         |
| 1.38509     | 1.38090 | 1.38505     | 1.39098         | 1.38571          | 1.39421         | 1.38592 | 1.38370 | 1.38842 | 1.38555 | 1.38959          | 1.37847 | 1.37332     |         |
| 1.42699     | 1.43507 | 1.42374     | 1.42422         | 1.42275          | 1.41178         | 1.42101 | 1.41632 | 1.42811 | 1.42097 | 1.42800          | 1.42020 | 1.43327     |         |
| 1.37748     | 1.37880 | 1.38056     | 1.38005         | 1.37924          | 1.37948         | 1.37630 | 1.39109 | 1.37716 | 1.38009 | 1.37982          | 1.39043 | 1.38842     |         |
| 1.45556     | 1.44788 | 1.44956     | 1.43829         | 1.44213          | 1.45245         | 1.44129 | 1.43466 | 1.45466 | 1.44663 | 1.45083          | 1.44647 | 1.46842     |         |
| 1.38627     | 1.38267 | 1.39079     | 1.39341         | 1.38668          | 1.39511         | 1.38784 | 1.38626 | 1.38924 | 1.38875 | 1.39115          | 1.38051 | 1.37418     |         |
| 1.42590     | 1.43388 | 1.42059     | 1.42289         | 1.42146          | 1.41147         | 1.42001 | 1.41480 | 1.42693 | 1.41802 | 1.42724          | 1.41887 | 1.43297     |         |
| 1.37804     | 1.37971 | 1.38254     | 1.38095         | 1.38009          | 1.37947         | 1.37687 | 1.39188 | 1.37802 | 1.38116 | 1.38022          | 1.39108 | 1.38794     |         |
| 1.45473     | 1.44680 | 1.44742     | 1.43673         | 1.44129          | 1.45224         | 1.44022 | 1.43319 | 1.45339 | 1.44483 | 1.45016          | 1.44578 | 1.46885     |         |
| 1.38686     | 1.38313 | 1.39204     | 1.39434         | 1.38777          | 1.39499         | 1.38840 | 1.38697 | 1.38957 | 1.38990 | 1.39149          | 1.38072 | 1.37379     |         |
| 1.42592     | 1.43360 | 1.41986     | 1.42244         | 1.42099          | 1.41102         | 1.41958 | 1.41428 | 1.42680 | 1.41722 | 1.42716          | 1.41853 | 1.43288     |         |
| 1.37815     | 1.37978 | 1.38300     | 1.38105         | 1.38053          | 1.37977         | 1.37710 | 1.39210 | 1.37753 | 1.38124 | 1.38030          | 1.39142 | 1.38836     |         |
| 1.45452     | 1.44691 | 1.44655     | 1.43628         | 1.44107          | 1.45229         | 1.43981 | 1.43258 | 1.45407 | 1.44438 | 1.44995          | 1.44562 | 1.46885     |         |
| 1.38701     | 1.38310 | 1.39267     | 1.39456         | 1.38758          | 1.39504         | 1.38861 | 1.38728 | 1.38954 | 1.39007 | 1.39155          | 1.38102 | 1.37388     |         |
| 1.42556     | 1.43365 | 1.41912     | 1.42215         | 1.42098          | 1.41104         | 1.41948 | 1.41419 | 1.42703 | 1.41665 | 1.42698          | 1.41862 | 1.43327     |         |
| 1.37815     | 1.37992 | 1.38316     | 1.38138         | 1.38036          | 1.37979         | 1.37719 | 1.39207 | 1.37787 | 1.38183 | 1.38040          | 1.39131 | 1.38809     |         |
| 1.45445     | 1.44672 | 1.44632     | 1.43596         | 1.44122          | 1.45242         | 1.43967 | 1.43236 | 1.45364 | 1.44410 | 1.44984          | 1.44572 | 1.46867     |         |
| 1.38698     | 1.38325 | 1.39280     | 1.39480         | 1.38671          | 1.39508         | 1.38866 | 1.38735 | 1.38987 | 1.39056 | 1.39163          | 1.38044 | 1.37389     |         |
| 1.42567     | 1.43351 | 1.41966     | 1.42216         | 1.42079          | 1.41101         | 1.41923 | 1.41416 | 1.42721 | 1.41679 | 1.42697          | 1.41870 | 1.43301     |         |
| 1.37818     | 1.37994 | 1.38269     | 1.38129         | 1.38033          | 1.37971         | 1.37732 | 1.39199 | 1.37737 | 1.38118 | 1.38037          | 1.39165 | 1.38796     |         |
| 1.45449     | 1.44673 | 1.44700     | 1.43595         | 1.44116          | 1.45246         | 1.43944 | 1.43238 | 1.45406 | 1.44427 | 1.44988          | 1.44544 | 1.46879     |         |
| 1.38710     | 1.38325 | 1.39222     | 1.39484         | 1.38733          | 1.39491         | 1.38877 | 1.38729 | 1.38937 | 1.39012 | 1.39164          | 1.38098 | 1.37369     |         |





**Table 4B-ESI.** The subsequent CC distances (Å) in the studied screw structures calculated at the B3LYP/6-31G\*\* level

| BF <sub>2</sub> | BH <sub>2</sub> | Br | CBr <sub>3</sub> | CCH | CCl <sub>3</sub> | CF <sub>3</sub> | CH <sub>3</sub> | CHO     | Cl | CN | COOH    | F | H |
|-----------------|-----------------|----|------------------|-----|------------------|-----------------|-----------------|---------|----|----|---------|---|---|
| 1.36305         | 1.36076         |    | 1.37163          |     | 1.37101          | 1.36929         |                 | 1.35884 |    |    | 1.35962 |   |   |
| 1.43764         | 1.44248         |    | 1.4309           |     | 1.43045          | 1.42248         |                 | 1.43442 |    |    | 1.43405 |   |   |
| 1.39323         | 1.40332         |    | 1.37229          |     | 1.3717           | 1.37696         |                 | 1.40144 |    |    | 1.39646 |   |   |
| 1.4584          | 1.45305         |    | 1.46211          |     | 1.46406          | 1.45684         |                 | 1.45066 |    |    | 1.45538 |   |   |
| 1.37547         | 1.37476         |    | 1.39279          |     | 1.38988          | 1.38592         |                 | 1.37933 |    |    | 1.37837 |   |   |
| 1.42985         | 1.43331         |    | 1.42662          |     | 1.42653          | 1.41835         |                 | 1.41866 |    |    | 1.42012 |   |   |
| 1.39543         | 1.4061          |    | 1.37464          |     | 1.37407          | 1.37792         |                 | 1.40467 |    |    | 1.39896 |   |   |
| 1.45704         | 1.45104         |    | 1.46138          |     | 1.46344          | 1.45524         |                 | 1.44819 |    |    | 1.45348 |   |   |
| 1.37626         | 1.37587         |    | 1.3931           |     | 1.39059          | 1.38699         |                 | 1.38119 |    |    | 1.37984 |   |   |
| 1.42906         | 1.43211         |    | 1.42618          |     | 1.42614          | 1.41712         |                 | 1.41739 |    |    | 1.41917 |   |   |
| 1.39591         | 1.40663         |    | 1.37473          |     | 1.37414          | 1.37865         |                 | 1.40552 |    |    | 1.39935 |   |   |
| 1.45682         | 1.45062         |    | 1.46148          |     | 1.46354          | 1.45444         |                 | 1.44778 |    |    | 1.45339 |   |   |
| 1.37653         | 1.3762          |    | 1.39318          |     | 1.39039          | 1.38696         |                 | 1.38149 |    |    | 1.37986 |   |   |
| 1.42879         | 1.43188         |    | 1.42608          |     | 1.42627          | 1.41742         |                 | 1.41717 |    |    | 1.41932 |   |   |
| 1.39598         | 1.40668         |    | 1.37488          |     | 1.37411          | 1.3784          |                 | 1.40557 |    |    | 1.39948 |   |   |
| 1.45676         | 1.45047         |    | 1.46148          |     | 1.46349          | 1.4549          |                 | 1.44763 |    |    | 1.45341 |   |   |
| 1.37657         | 1.37615         |    | 1.39318          |     | 1.39038          | 1.38664         |                 | 1.38118 |    |    | 1.37982 |   |   |
| 1.42874         | 1.43182         |    | 1.42621          |     | 1.42619          | 1.41741         |                 | 1.41727 |    |    | 1.41927 |   |   |
| 1.39594         | 1.40685         |    | 1.37458          |     | 1.37396          | 1.37878         |                 | 1.40611 |    |    | 1.39953 |   |   |
| 1.4568          | 1.45033         |    | 1.46172          |     | 1.4637           | 1.45471         |                 | 1.44754 |    |    | 1.45332 |   |   |
| 1.37656         | 1.37626         |    | 1.39281          |     | 1.39021          | 1.38691         |                 | 1.38153 |    |    | 1.37999 |   |   |
| 1.42878         | 1.43165         |    | 1.42641          |     | 1.42643          | 1.41701         |                 | 1.41687 |    |    | 1.4192  |   |   |
| 1.3959          | 1.40688         |    | 1.37477          |     | 1.37394          | 1.37874         |                 | 1.40593 |    |    | 1.39944 |   |   |
| 1.45693         | 1.45032         |    | 1.46169          |     | 1.46372          | 1.45459         |                 | 1.44744 |    |    | 1.45336 |   |   |
| 1.37639         | 1.37634         |    | 1.39308          |     | 1.39028          | 1.38823         |                 | 1.3816  |    |    | 1.37982 |   |   |
| 1.42884         | 1.43166         |    | 1.42625          |     | 1.42642          | 1.41748         |                 | 1.41698 |    |    | 1.41934 |   |   |
| 1.396           | 1.40683         |    | 1.37474          |     | 1.37366          | 1.37889         |                 | 1.40583 |    |    | 1.39958 |   |   |
| 1.45668         | 1.45029         |    | 1.46177          |     | 1.46386          | 1.45437         |                 | 1.44728 |    |    | 1.45331 |   |   |
| 1.37649         | 1.37624         |    | 1.3929           |     | 1.39003          | 1.38646         |                 | 1.38132 |    |    | 1.37987 |   |   |
| 1.42876         | 1.4317          |    | 1.42636          |     | 1.42649          | 1.41677         |                 | 1.41714 |    |    | 1.41926 |   |   |
| 1.39604         | 1.4069          |    | 1.37473          |     | 1.37369          | 1.37888         |                 | 1.40609 |    |    | 1.39964 |   |   |
| 1.45666         | 1.45026         |    | 1.46173          |     | 1.46395          | 1.45457         |                 | 1.44732 |    |    | 1.45331 |   |   |
| 1.37652         | 1.37632         |    | 1.39301          |     | 1.39004          | 1.38732         |                 | 1.38153 |    |    | 1.37982 |   |   |

|             |         |             |                 |                  |                 |         |     |         |         |                  |         |             |  |
|-------------|---------|-------------|-----------------|------------------|-----------------|---------|-----|---------|---------|------------------|---------|-------------|--|
| 1.42877     | 1.43165 |             | 1.42639         |                  | 1.4266          | 1.41752 |     | 1.4171  |         |                  | 1.41941 |             |  |
| 1.396       | 1.40672 |             | 1.37459         |                  | 1.37356         | 1.37842 |     | 1.40574 |         |                  | 1.39951 |             |  |
| 1.45674     | 1.4506  |             | 1.46177         |                  | 1.46385         | 1.45523 |     | 1.44758 |         |                  | 1.45345 |             |  |
| 1.37649     | 1.3762  |             | 1.3928          |                  | 1.3898          | 1.38675 |     | 1.38124 |         |                  | 1.37988 |             |  |
| 1.42901     | 1.43211 |             | 1.42671         |                  | 1.42673         | 1.41812 |     | 1.41782 |         |                  | 1.41987 |             |  |
| 1.39507     | 1.4057  |             | 1.37415         |                  | 1.37345         | 1.37775 |     | 1.40453 |         |                  | 1.39842 |             |  |
| 1.45792     | 1.45255 |             | 1.46209         |                  | 1.46384         | 1.45616 |     | 1.45072 |         |                  | 1.45548 |             |  |
| 1.37639     | 1.37602 |             | 1.39208         |                  | 1.38957         | 1.3849  |     | 1.38543 |         |                  | 1.38293 |             |  |
| 1.4308      | 1.43534 |             | 1.43398         |                  | 1.43285         | 1.42587 |     | 1.41937 |         |                  | 1.42129 |             |  |
| 1.38074     | 1.38878 |             | 1.36291         |                  | 1.36359         | 1.36507 |     | 1.38108 |         |                  | 1.37713 |             |  |
|             |         |             |                 |                  |                 |         |     |         |         |                  |         |             |  |
|             |         |             |                 |                  |                 |         |     |         |         |                  |         |             |  |
| <i>i</i> Pr | Li      | <i>n</i> Bu | NH <sub>2</sub> | NMe <sub>2</sub> | NO <sub>2</sub> | OH      | OMe | Ph      | SH      | SiH <sub>3</sub> | SMe     | <i>t</i> Bu |  |
| 1.36495     | 1.37111 | 1.36484     | 1.36363         | 1.36321          | 1.35965         | 1.36435 |     | 1.37654 | 1.36395 | 1.36607          | 1.37162 | 1.36506     |  |
| 1.43379     | 1.4372  | 1.43322     | 1.43316         | 1.43329          | 1.42538         | 1.42653 |     | 1.43309 | 1.42957 | 1.4366           | 1.42738 | 1.43744     |  |
| 1.38419     | 1.38823 | 1.38401     | 1.39088         | 1.3851           | 1.39247         | 1.3868  |     | 1.37556 | 1.38706 | 1.38836          | 1.37953 | 1.38746     |  |
| 1.4584      | 1.45419 | 1.45817     | 1.44404         | 1.44586          | 1.45514         | 1.44408 |     | 1.45737 | 1.44942 | 1.45487          | 1.45093 | 1.46924     |  |
| 1.37614     | 1.3779  | 1.3761      | 1.37735         | 1.3777           | 1.37775         | 1.37554 |     | 1.38812 | 1.37871 | 1.37831          | 1.3894  | 1.3733      |  |
| 1.42735     | 1.4357  | 1.42709     | 1.42609         | 1.4226           | 1.41259         | 1.42044 |     | 1.42777 | 1.41937 | 1.4289           | 1.42021 | 1.43354     |  |
| 1.38519     | 1.38326 | 1.38463     | 1.39183         | 1.38592          | 1.3937          | 1.38784 |     | 1.37705 | 1.38849 | 1.39002          | 1.38    | 1.38733     |  |
| 1.45686     | 1.44837 | 1.45643     | 1.44219         | 1.44231          | 1.45318         | 1.44037 |     | 1.45541 | 1.44575 | 1.45251          | 1.44683 | 1.46948     |  |
| 1.37691     | 1.37964 | 1.37681     | 1.37691         | 1.37963          | 1.37891         | 1.37687 |     | 1.38901 | 1.38067 | 1.37931          | 1.39067 | 1.37331     |  |
| 1.42692     | 1.43493 | 1.4267      | 1.42616         | 1.42136          | 1.41194         | 1.41974 |     | 1.42684 | 1.41774 | 1.42788          | 1.41929 | 1.43336     |  |
| 1.38542     | 1.38274 | 1.38471     | 1.39197         | 1.38653          | 1.39433         | 1.38819 |     | 1.3774  | 1.38934 | 1.39048          | 1.38044 | 1.38761     |  |
| 1.45676     | 1.44811 | 1.45649     | 1.43876         | 1.44164          | 1.45314         | 1.43993 |     | 1.45496 | 1.44507 | 1.45216          | 1.44636 | 1.46949     |  |
| 1.37705     | 1.37958 | 1.37692     | 1.37943         | 1.37998          | 1.37901         | 1.377   |     | 1.38906 | 1.38115 | 1.37951          | 1.3909  | 1.37346     |  |
| 1.4268      | 1.43504 | 1.42666     | 1.42472         | 1.42099          | 1.41183         | 1.41956 |     | 1.42676 | 1.41747 | 1.42788          | 1.41915 | 1.43327     |  |
| 1.38559     | 1.38249 | 1.38425     | 1.39231         | 1.38666          | 1.39446         | 1.38825 |     | 1.37735 | 1.38939 | 1.3904           | 1.38062 | 1.38764     |  |
| 1.45657     | 1.4483  | 1.45714     | 1.44107         | 1.44144          | 1.45309         | 1.43982 |     | 1.45511 | 1.4449  | 1.4522           | 1.44618 | 1.4695      |  |
| 1.37708     | 1.3794  | 1.37642     | 1.3774          | 1.38009          | 1.37899         | 1.37706 |     | 1.38911 | 1.38103 | 1.37939          | 1.39093 | 1.37361     |  |
| 1.42666     | 1.43495 | 1.42697     | 1.42584         | 1.42107          | 1.41178         | 1.41957 |     | 1.42697 | 1.41741 | 1.42785          | 1.41885 | 1.43347     |  |
| 1.38584     | 1.38235 | 1.3843      | 1.39208         | 1.38658          | 1.39452         | 1.38822 |     | 1.3773  | 1.38968 | 1.39076          | 1.38076 | 1.3878      |  |
| 1.45633     | 1.44849 | 1.45726     | 1.43838         | 1.44137          | 1.45301         | 1.43988 |     | 1.45533 | 1.44476 | 1.45193          | 1.44604 | 1.46933     |  |
| 1.37719     | 1.37934 | 1.37618     | 1.37967         | 1.38014          | 1.37902         | 1.377   |     | 1.38907 | 1.38116 | 1.37963          | 1.39105 | 1.37376     |  |
| 1.42666     | 1.43511 | 1.42693     | 1.42457         | 1.42092          | 1.41174         | 1.41962 |     | 1.42682 | 1.41733 | 1.4276           | 1.41908 | 1.43306     |  |
| 1.38577     | 1.38223 | 1.38491     | 1.39226         | 1.38666          | 1.39457         | 1.38822 |     | 1.37733 | 1.38973 | 1.3906           | 1.38051 | 1.38831     |  |
| 1.45628     | 1.44856 | 1.45676     | 1.44109         | 1.44123          | 1.45299         | 1.44002 |     | 1.45516 | 1.44481 | 1.45202          | 1.44605 | 1.46859     |  |
| 1.3772      | 1.37923 | 1.37694     | 1.37733         | 1.38041          | 1.37906         | 1.37696 |     | 1.38901 | 1.38118 | 1.37953          | 1.39088 | 1.37415     |  |



**Table 4C-ESI.** The subsequent CC distances (Å) in the studied spring structures calculated at the B3LYP/6-31G\*\* level

| BF <sub>2</sub> | BH <sub>2</sub> | Br      | CBr <sub>3</sub> | CCH     | CCl <sub>3</sub> | CF <sub>3</sub> | CH <sub>3</sub> | CHO     | Cl      | CN      | COOH    | F       | H       |
|-----------------|-----------------|---------|------------------|---------|------------------|-----------------|-----------------|---------|---------|---------|---------|---------|---------|
| 1.36245         | 1.38724         | 1.36526 | 1.36237          | 1.36171 | 1.36322          | 1.36502         | 1.36553         | 1.35903 | 1.36455 | 1.36254 | 1.37567 | 1.36659 | 1.36817 |
| 1.43766         | 1.43708         | 1.42125 | 1.43467          | 1.43634 | 1.43312          | 1.42607         | 1.4307          | 1.43517 | 1.42449 | 1.43233 | 1.4259  | 1.4166  | 1.42277 |
| 1.39491         | 1.37427         | 1.37805 | 1.39226          | 1.3961  | 1.3894           | 1.3857          | 1.38503         | 1.40625 | 1.38159 | 1.39423 | 1.37723 | 1.38012 | 1.37939 |
| 1.4554          | 1.45061         | 1.44983 | 1.45944          | 1.44742 | 1.46309          | 1.45433         | 1.45314         | 1.44742 | 1.45019 | 1.44855 | 1.45322 | 1.44282 | 1.44972 |
| 1.37328         | 1.40408         | 1.38097 | 1.3698           | 1.37549 | 1.37116          | 1.37587         | 1.37758         | 1.37619 | 1.37632 | 1.37661 | 1.39807 | 1.38156 | 1.38027 |
| 1.42987         | 1.43373         | 1.41621 | 1.42744          | 1.4275  | 1.42792          | 1.41871         | 1.42466         | 1.42371 | 1.41761 | 1.42392 | 1.42483 | 1.40769 | 1.41491 |
| 1.39661         | 1.37429         | 1.37827 | 1.39412          | 1.39885 | 1.3901           | 1.38789         | 1.38644         | 1.40873 | 1.383   | 1.39655 | 1.3749  | 1.38175 | 1.38168 |
| 1.45327         | 1.44858         | 1.44713 | 1.45714          | 1.44371 | 1.463            | 1.45201         | 1.45084         | 1.44265 | 1.44756 | 1.44511 | 1.45046 | 1.4379  | 1.44614 |
| 1.37438         | 1.40491         | 1.38283 | 1.37006          | 1.37787 | 1.37121          | 1.37718         | 1.37884         | 1.37845 | 1.37772 | 1.37875 | 1.39887 | 1.38388 | 1.3822  |
| 1.42911         | 1.43339         | 1.41521 | 1.42702          | 1.42575 | 1.42772          | 1.41772         | 1.42366         | 1.42151 | 1.41662 | 1.42235 | 1.42424 | 1.40617 | 1.41329 |
| 1.39745         | 1.37437         | 1.37847 | 1.39628          | 1.39956 | 1.39053          | 1.38808         | 1.38701         | 1.41012 | 1.38367 | 1.39752 | 1.37571 | 1.38284 | 1.38249 |
| 1.45277         | 1.44842         | 1.44644 | 1.45483          | 1.44283 | 1.46262          | 1.45168         | 1.45027         | 1.44154 | 1.44696 | 1.44422 | 1.45074 | 1.4368  | 1.44521 |
| 1.37466         | 1.40503         | 1.38301 | 1.37044          | 1.37828 | 1.37127          | 1.37725         | 1.37918         | 1.37914 | 1.37798 | 1.37934 | 1.4003  | 1.38427 | 1.38267 |
| 1.42874         | 1.43331         | 1.41493 | 1.42616          | 1.42542 | 1.42768          | 1.41752         | 1.42342         | 1.42094 | 1.41631 | 1.42196 | 1.4247  | 1.40576 | 1.41285 |
| 1.39738         | 1.37441         | 1.37892 | 1.39567          | 1.39987 | 1.3904           | 1.38866         | 1.38715         | 1.41007 | 1.38397 | 1.39774 | 1.37563 | 1.383   | 1.38272 |
| 1.45262         | 1.44848         | 1.44631 | 1.45408          | 1.4427  | 1.46268          | 1.45128         | 1.45017         | 1.44125 | 1.44664 | 1.44396 | 1.45136 | 1.43652 | 1.44498 |
| 1.37475         | 1.40489         | 1.38315 | 1.37048          | 1.37836 | 1.37121          | 1.37737         | 1.37926         | 1.37913 | 1.37826 | 1.37928 | 1.4006  | 1.38447 | 1.38283 |
| 1.42875         | 1.43334         | 1.38315 | 1.42595          | 1.42531 | 1.42792          | 1.41723         | 1.42334         | 1.42096 | 1.41617 | 1.4218  | 1.42474 | 1.40566 | 1.4127  |
| 1.39762         | 1.37438         | 1.37902 | 1.39539          | 1.39985 | 1.39068          | 1.3891          | 1.38734         | 1.41067 | 1.38416 | 1.39791 | 1.37521 | 1.38313 | 1.38278 |
| 1.45254         | 1.4485          | 1.44605 | 1.4543           | 1.44259 | 1.46241          | 1.4511          | 1.44991         | 1.44123 | 1.44644 | 1.44377 | 1.45155 | 1.43643 | 1.44491 |
| 1.37475         | 1.40498         | 1.38325 | 1.37057          | 1.37828 | 1.37131          | 1.37777         | 1.37943         | 1.37942 | 1.37847 | 1.37928 | 1.40006 | 1.38444 | 1.3828  |
| 1.42862         | 1.43337         | 1.4147  | 1.42598          | 1.42526 | 1.42764          | 1.41724         | 1.42325         | 1.42076 | 1.41614 | 1.42168 | 1.42469 | 1.40565 | 1.41269 |
| 1.39752         | 1.37445         | 1.37924 | 1.39555          | 1.40016 | 1.39114          | 1.38903         | 1.3874          | 1.41011 | 1.3841  | 1.39829 | 1.37524 | 1.38309 | 1.38279 |
| 1.45248         | 1.44854         | 1.44606 | 1.45444          | 1.44246 | 1.46199          | 1.45102         | 1.44989         | 1.44118 | 1.44651 | 1.44354 | 1.45167 | 1.43647 | 1.44492 |
| 1.37474         | 1.40492         | 1.38348 | 1.37053          | 1.37844 | 1.37159          | 1.37774         | 1.37957         | 1.37911 | 1.3785  | 1.37952 | 1.40016 | 1.38443 | 1.38277 |
| 1.42861         | 1.43347         | 1.41469 | 1.42626          | 1.42518 | 1.42771          | 1.41713         | 1.42326         | 1.42092 | 1.41611 | 1.42153 | 1.42458 | 1.40572 | 1.41272 |
| 1.39746         | 1.37448         | 1.37901 | 1.39558          | 1.40018 | 1.39065          | 1.38884         | 1.3872          | 1.41062 | 1.38385 | 1.39843 | 1.37519 | 1.38296 | 1.38281 |
| 1.45249         | 1.44855         | 1.44611 | 1.45443          | 1.44234 | 1.46231          | 1.4512          | 1.44996         | 1.44124 | 1.44676 | 1.44329 | 1.45103 | 1.43662 | 1.445   |
| 1.37471         | 1.40501         | 1.38342 | 1.3705           | 1.37851 | 1.37139          | 1.37755         | 1.37938         | 1.37932 | 1.37818 | 1.37957 | 1.39921 | 1.38431 | 1.3827  |
| 1.42866         | 1.43361         | 1.41481 | 1.42599          | 1.42522 | 1.42778          | 1.41734         | 1.42337         | 1.42079 | 1.41629 | 1.42143 | 1.42436 | 1.40589 | 1.41287 |
| 1.39753         | 1.37437         | 1.3788  | 1.39483          | 1.40016 | 1.39036          | 1.38851         | 1.38713         | 1.41011 | 1.38368 | 1.39853 | 1.37488 | 1.3828  | 1.38265 |
| 1.45252         | 1.44873         | 1.44633 | 1.45508          | 1.44256 | 1.46264          | 1.45128         | 1.45028         | 1.44126 | 1.44703 | 1.44327 | 1.45119 | 1.43701 | 1.44523 |
| 1.37465         | 1.40482         | 1.38305 | 1.37068          | 1.37838 | 1.3712           | 1.37729         | 1.37917         | 1.37885 | 1.37784 | 1.37941 | 1.39953 | 1.38381 | 1.38248 |

|             |         |             |                 |                  |                 |         |         |         |         |                  |         |             |         |
|-------------|---------|-------------|-----------------|------------------|-----------------|---------|---------|---------|---------|------------------|---------|-------------|---------|
| 1.42867     | 1.43388 | 1.41514     | 1.42612         | 1.42554          | 1.42771         | 1.41758 | 1.4237  | 1.42112 | 1.41671 | 1.42164          | 1.42491 | 1.40641     | 1.4133  |
| 1.39717     | 1.37417 | 1.37848     | 1.39481         | 1.39966          | 1.39068         | 1.38859 | 1.38672 | 1.41028 | 1.38329 | 1.39859          | 1.37512 | 1.38209     | 1.3822  |
| 1.4528      | 1.44917 | 1.44691     | 1.45565         | 1.44348          | 1.46249         | 1.45169 | 1.45078 | 1.4418  | 1.44764 | 1.44399          | 1.45167 | 1.43816     | 1.44614 |
| 1.37436     | 1.40444 | 1.38253     | 1.37012         | 1.37791          | 1.37115         | 1.377   | 1.37857 | 1.37857 | 1.37738 | 1.37943          | 1.39861 | 1.38276     | 1.38167 |
| 1.42929     | 1.43477 | 1.41622     | 1.42707         | 1.42665          | 1.42791         | 1.41823 | 1.42469 | 1.4221  | 1.41764 | 1.42267          | 1.42557 | 1.40834     | 1.41491 |
| 1.39637     | 1.373   | 1.37674     | 1.39431         | 1.39714          | 1.39056         | 1.38695 | 1.38533 | 1.40816 | 1.38191 | 1.39594          | 1.37324 | 1.37998     | 1.38027 |
| 1.45482     | 1.4513  | 1.44978     | 1.45579         | 1.44722          | 1.46277         | 1.45409 | 1.45316 | 1.44608 | 1.45022 | 1.44751          | 1.4538  | 1.44298     | 1.44972 |
| 1.37508     | 1.40291 | 1.38085     | 1.36906         | 1.37697          | 1.36997         | 1.37581 | 1.37727 | 1.38224 | 1.37703 | 1.37841          | 1.39647 | 1.38051     | 1.37939 |
| 1.43092     | 1.4421  | 1.42373     | 1.42968         | 1.4326           | 1.43101         | 1.42368 | 1.43092 | 1.42319 | 1.42252 | 1.42868          | 1.43425 | 1.41768     | 1.42277 |
| 1.37984     | 1.36092 | 1.36449     | 1.3719          | 1.37994          | 1.37108         | 1.36875 | 1.36989 | 1.379   | 1.36661 | 1.37898          | 1.36048 | 1.36456     | 1.36817 |
|             |         |             |                 |                  |                 |         |         |         |         |                  |         |             |         |
|             |         |             |                 |                  |                 |         |         |         |         |                  |         |             |         |
| <i>i</i> Pr | Li      | <i>n</i> Bu | NH <sub>2</sub> | NMe <sub>2</sub> | NO <sub>2</sub> | OH      | OMe     | Ph      | SH      | SiH <sub>3</sub> | SMe     | <i>t</i> Bu |         |
| 1.37104     | 1.37103 | 1.3649      | 1.373           | 1.36504          | 1.37036         | 1.36644 | 1.36749 | 1.36442 | 1.3645  | 1.36614          | 1.36315 | 1.37145     |         |
| 1.43298     | 1.43621 | 1.43342     | 1.43303         | 1.43378          | 1.41764         | 1.42507 | 1.42748 | 1.43436 | 1.43087 | 1.43593          | 1.43303 | 1.43632     |         |
| 1.3753      | 1.38857 | 1.38374     | 1.37992         | 1.39452          | 1.37576         | 1.38716 | 1.3917  | 1.38833 | 1.3849  | 1.38805          | 1.38815 | 1.37208     |         |
| 1.45782     | 1.46081 | 1.45782     | 1.44588         | 1.44827          | 1.45521         | 1.44197 | 1.44196 | 1.45627 | 1.4493  | 1.45502          | 1.45184 | 1.47002     |         |
| 1.38457     | 1.3988  | 1.37532     | 1.38805         | 1.37946          | 1.39199         | 1.38206 | 1.3836  | 1.37483 | 1.37647 | 1.37751          | 1.37415 | 1.3876      |         |
| 1.42866     | 1.43478 | 1.42856     | 1.42642         | 1.42496          | 1.41729         | 1.41608 | 1.41821 | 1.42773 | 1.42479 | 1.42986          | 1.42661 | 1.43426     |         |
| 1.37605     | 1.38758 | 1.38436     | 1.38174         | 1.3967           | 1.37301         | 1.38861 | 1.39347 | 1.39004 | 1.38576 | 1.38927          | 1.38915 | 1.37279     |         |
| 1.45658     | 1.46277 | 1.45709     | 1.4428          | 1.44426          | 1.45406         | 1.43633 | 1.43589 | 1.45433 | 1.44699 | 1.45327          | 1.44884 | 1.4703      |         |
| 1.38532     | 1.39819 | 1.37563     | 1.38982         | 1.38167          | 1.39265         | 1.38455 | 1.38637 | 1.37583 | 1.37757 | 1.37838          | 1.37555 | 1.3877      |         |
| 1.42821     | 1.43451 | 1.42806     | 1.42535         | 1.42356          | 1.41699         | 1.41447 | 1.41636 | 1.42708 | 1.42394 | 1.42913          | 1.42581 | 1.43402     |         |
| 1.37624     | 1.38726 | 1.38501     | 1.38234         | 1.39743          | 1.37311         | 1.38971 | 1.39473 | 1.39036 | 1.38622 | 1.38958          | 1.38926 | 1.37268     |         |
| 1.45637     | 1.46388 | 1.45656     | 1.44199         | 1.44341          | 1.45415         | 1.43483 | 1.4343  | 1.45404 | 1.44665 | 1.45305          | 1.44893 | 1.47032     |         |
| 1.38541     | 1.3975  | 1.37597     | 1.39033         | 1.38203          | 1.39259         | 1.38524 | 1.38718 | 1.37599 | 1.37774 | 1.37844          | 1.3753  | 1.38754     |         |
| 1.42801     | 1.43441 | 1.42803     | 1.42505         | 1.4232           | 1.41691         | 1.41389 | 1.41576 | 1.42693 | 1.42375 | 1.42898          | 1.4255  | 1.43422     |         |
| 1.37621     | 1.38711 | 1.38534     | 1.38263         | 1.39755          | 1.37303         | 1.39    | 1.39499 | 1.39041 | 1.38633 | 1.3897           | 1.38983 | 1.3726      |         |
| 1.45642     | 1.46418 | 1.45588     | 1.44154         | 1.44317          | 1.45428         | 1.43432 | 1.4337  | 1.45384 | 1.44658 | 1.45299          | 1.44854 | 1.47023     |         |
| 1.38544     | 1.39732 | 1.37631     | 1.39049         | 1.38213          | 1.39248         | 1.38551 | 1.38742 | 1.37608 | 1.37774 | 1.37849          | 1.37571 | 1.38738     |         |
| 1.42794     | 1.43436 | 1.42799     | 1.42499         | 1.42302          | 1.41689         | 1.41378 | 1.41565 | 1.42682 | 1.42374 | 1.42893          | 1.42561 | 1.43437     |         |
| 1.37611     | 1.387   | 1.38488     | 1.38275         | 1.39764          | 1.3731          | 1.3901  | 1.39522 | 1.39051 | 1.38639 | 1.38974          | 1.38998 | 1.37255     |         |
| 1.45653     | 1.46409 | 1.45656     | 1.44134         | 1.44289          | 1.45449         | 1.43409 | 1.43346 | 1.45378 | 1.44644 | 1.45298          | 1.44784 | 1.47052     |         |
| 1.38539     | 1.39731 | 1.37592     | 1.39067         | 1.38233          | 1.39249         | 1.3856  | 1.38761 | 1.37615 | 1.37783 | 1.37848          | 1.37607 | 1.38745     |         |
| 1.42799     | 1.43439 | 1.42817     | 1.425           | 1.42295          | 1.417           | 1.41366 | 1.41543 | 1.42677 | 1.42374 | 1.42894          | 1.42558 | 1.43425     |         |
| 1.37622     | 1.38683 | 1.38409     | 1.38263         | 1.39755          | 1.37296         | 1.39007 | 1.39516 | 1.39058 | 1.38641 | 1.38977          | 1.38988 | 1.37271     |         |
| 1.45641     | 1.46407 | 1.45764     | 1.44146         | 1.44282          | 1.45463         | 1.43417 | 1.43356 | 1.45367 | 1.44646 | 1.4529           | 1.44857 | 1.47059     |         |
| 1.38533     | 1.39726 | 1.37538     | 1.39061         | 1.38243          | 1.39228         | 1.38552 | 1.38743 | 1.37614 | 1.37793 | 1.37849          | 1.37612 | 1.38747     |         |



**Table 5ESI.** Population of the  $\sigma$ - and  $\pi$ - valence orbitals in 3-substituted thiophenes and substituent effect descriptors based on the thiophene ring C-atoms based on NBO populations calculated from B3LYP/6-31G\*\* optimized structures.

| Substituent      | population of valence orbitals |         | sEDA <sub>T</sub> | pEDA <sub>T</sub> | (s+p)EDA <sub>T</sub> |
|------------------|--------------------------------|---------|-------------------|-------------------|-----------------------|
|                  | sigma                          | pi      |                   |                   |                       |
| BF <sub>2</sub>  | 13.24416                       | 4.29465 | 0.181             | -0.051            | 0.130                 |
| BH <sub>2</sub>  | 13.21942                       | 4.23218 | 0.156             | -0.114            | 0.043                 |
| Br               | 12.88661                       | 4.40015 | -0.176            | 0.054             | -0.122                |
| CBr <sub>3</sub> | 12.87874                       | 4.32028 | -0.184            | -0.026            | -0.210                |
| CCH              | 12.86739                       | 4.34119 | -0.196            | -0.005            | -0.200                |
| CCl <sub>3</sub> | 12.87137                       | 4.32561 | -0.192            | -0.020            | -0.212                |
| CF <sub>3</sub>  | 12.93227                       | 4.33546 | -0.131            | -0.010            | -0.141                |
| CH <sub>3</sub>  | 12.84201                       | 4.34636 | -0.221            | 0.000             | -0.221                |
| CHO-1            | 12.95171                       | 4.28908 | -0.111            | -0.057            | -0.168                |
| CHO-2            | 12.95640                       | 4.27443 | -0.107            | -0.071            | -0.178                |
| Cl               | 12.81577                       | 4.40524 | -0.247            | 0.059             | -0.188                |
| CN               | 12.90128                       | 4.33436 | -0.162            | -0.012            | -0.173                |
| COOH-1           | 12.94267                       | 4.29709 | -0.120            | -0.049            | -0.169                |
| COOH-2           | 12.94239                       | 4.29653 | -0.121            | -0.049            | -0.170                |
| F                | 12.45335                       | 4.40832 | -0.610            | 0.062             | -0.547                |
| H                | 13.06300                       | 4.34593 | 0.000             | 0.000             | 0.000                 |
| iPr              | 12.83910                       | 4.34218 | -0.224            | -0.004            | -0.228                |
| Li               | 13.51715                       | 4.30231 | 0.454             | -0.044            | 0.411                 |
| nBu              | 12.83696                       | 4.34519 | -0.226            | -0.001            | -0.227                |
| NH <sub>2</sub>  | 12.64319                       | 4.43925 | -0.420            | 0.093             | -0.326                |
| NMe <sub>2</sub> | 12.63290                       | 4.43857 | -0.430            | 0.093             | -0.337                |
| NO <sub>2</sub>  | 12.73194                       | 4.29979 | -0.331            | -0.046            | -0.377                |
| OH-1             | 12.52177                       | 4.44049 | -0.541            | 0.095             | -0.447                |
| OH-2             | 12.52809                       | 4.43020 | -0.535            | 0.084             | -0.451                |
| OMe-1            | 12.52083                       | 4.44340 | -0.542            | 0.097             | -0.445                |
| OMe-2            | 12.52789                       | 4.43082 | -0.535            | 0.085             | -0.450                |
| Ph               | 12.83674                       | 4.34137 | -0.226            | -0.005            | -0.231                |
| SH-1             | 12.96271                       | 4.37009 | -0.100            | 0.024             | -0.076                |
| SH-2             | 12.93700                       | 4.42259 | -0.126            | 0.077             | -0.049                |
| SiH <sub>3</sub> | 13.25088                       | 4.33657 | 0.188             | -0.009            | 0.179                 |
| SMe-1            | 12.95514                       | 4.43078 | -0.108            | 0.085             | -0.023                |
| SMe-2            | 12.98536                       | 4.36267 | -0.078            | 0.017             | -0.061                |
| tBu              | 12.83414                       | 4.35164 | -0.229            | 0.006             | -0.223                |



**Table 6ESI.** Volume of 3-substituted thiophenes and pure substituents estimated based on cavity volume or surface calculated assuming the scrf=(iefpcm,solvent=water,read) key and PCMDoc PDens=1.0 as the "read" parameters using the single point at the 6-31G\*\* calculations of the structures optimized in vacuum. Index "rel" means that unsubstituted and thiophene with abstracted hydrogen in position 3 was subtracted.  $L_{\text{subst}}$  denotes length of the substituent from the ipso C-atom to the most distanced atom of the substituent or the position of the face defined by atoms as in  $\text{CF}_3$  or  $\text{CBr}_3$  groups.  $W$  is the substituent width calculated from the cavity, and surface, assuming that the substituent volume is equal to the volume of a cylinder, or a cuboid or with one dimension equal to two radii of the bulkiest atom of the substituent.

| Substituent | 3-subst thiophene |                   | sole substituent     |                       |                    |                      |                       |                          |                     |
|-------------|-------------------|-------------------|----------------------|-----------------------|--------------------|----------------------|-----------------------|--------------------------|---------------------|
|             | $C_{\text{vol}}$  | $C_{\text{surf}}$ | $C_{\text{vol/rel}}$ | $C_{\text{surf/rel}}$ | $L_{\text{subst}}$ | $W_{\text{rel-cav}}$ | $W_{\text{rel-surf}}$ | $W_{\text{bulkiest-at}}$ | $W_{\text{rel/at}}$ |
|             | $\text{\AA}^3$    | $\text{\AA}^2$    | $\text{\AA}^3$       | $\text{\AA}^2$        | $\text{\AA}$       | $\text{\AA}^2$       | $\text{\AA}^2$        | $\text{\AA}$             | $\text{\AA}$        |
| bf2         | 159.6             | 165.8             | 42.2                 | 39.9                  | 2.23079            | 4.9                  | 17.9                  | 0.8141                   | 22.0                |
| bh2         | 149.5             | 157.1             | 32.1                 | 31.2                  | 2.13122            | 4.4                  | 14.7                  | 0.8141                   | 18.0                |
| br          | 150.9             | 157               | 33.5                 | 31.1                  | 1.89861            | 4.7                  | 16.4                  | 1.0305                   | 15.9                |
| cbr3        | 233.5             | 221.3             | 116.1                | 95.4                  | 2.20429            | 8.2                  | 43.3                  | 1.0305                   | 42.0                |
| cch         | 156.3             | 163.8             | 38.9                 | 37.9                  | 3.69828            | 3.7                  | 10.3                  | 0.6513                   | 15.8                |
| ccl3        | 211.6             | 206.6             | 94.2                 | 80.7                  | 2.14666            | 7.5                  | 37.6                  | 0.7807                   | 48.2                |
| cf3         | 166.7             | 171.6             | 49.3                 | 45.7                  | 1.99203            | 5.6                  | 23.0                  | 0.6513                   | 35.3                |
| ch3         | 146.4             | 155.5             | 29.0                 | 29.6                  | 1.90155            | 4.4                  | 15.6                  | 0.6513                   | 23.9                |
| cho-1       | 151.6             | 160.1             | 34.2                 | 34.2                  | 2.04784            | 4.6                  | 16.7                  | 0.6513                   | 25.7                |
| cho-2       | 151.1             | 157.8             | 33.7                 | 31.9                  | 2.04784            | 4.6                  | 15.6                  | 0.6513                   | 23.9                |
| cl          | 143.6             | 151.5             | 26.2                 | 25.6                  | 1.74755            | 4.4                  | 14.7                  | 0.7807                   | 18.8                |
| cn          | 150.0             | 157.9             | 32.6                 | 32.0                  | 2.59015            | 4.0                  | 12.4                  | 0.6513                   | 19.0                |
| cooh-1      | 162.3             | 167               | 44.9                 | 41.1                  | 2.56628            | 4.7                  | 16.0                  | 0.6513                   | 24.6                |
| cooh-2      | 162.3             | 167.6             | 44.9                 | 41.7                  | 2.56628            | 4.7                  | 16.3                  | 0.6513                   | 25.0                |
| f           | 127.8             | 137               | 10.4                 | 11.1                  | 1.34421            | 3.1                  | 8.3                   | 0.4071                   | 20.4                |
| h           | 120.8             | 130.8             | 3.4                  | 4.9                   | 1.08390            | 2.0                  | 4.6                   | 0.5292                   | 8.6                 |
| ipr         | 196.1             | 197.4             | 78.7                 | 71.5                  | 3.22870            | 5.6                  | 22.2                  | 0.6513                   | 34.0                |
| li          | 124.4             | 136.1             | 7.0                  | 10.2                  | 1.95828            | 2.1                  | 5.2                   | 1.6282                   | 3.2                 |
| nbu         | 223.3             | 226               | 105.9                | 100.1                 | 6.02258            | 4.7                  | 16.6                  | 0.6513                   | 25.5                |
| nh2         | 140.3             | 149.2             | 22.9                 | 23.3                  | 1.85288            | 4.0                  | 12.6                  | 0.5427                   | 23.2                |
| nme         | 187.5             | 187.1             | 70.1                 | 61.2                  | 3.13000            | 5.3                  | 19.6                  | 0.6513                   | 30.0                |
| no2         | 156.3             | 161.3             | 38.9                 | 35.4                  | 2.01781            | 5.0                  | 17.6                  | 0.5427                   | 32.4                |
| oh-1        | 133.6             | 142.1             | 16.2                 | 16.2                  | 1.91181            | 3.3                  | 8.5                   | 0.4652                   | 18.3                |
| oh-2        | 133.7             | 142.1             | 16.3                 | 16.2                  | 1.91181            | 3.3                  | 8.5                   | 0.4652                   | 18.3                |
| ome-1       | 159.4             | 164.5             | 42.0                 | 38.6                  | 3.25775            | 4.1                  | 11.9                  | 0.6513                   | 18.2                |
| ome-2       | 159.1             | 165.9             | 41.7                 | 40.0                  | 3.25775            | 4.0                  | 12.3                  | 0.6513                   | 18.9                |
| ph          | 223.4             | 215.6             | 106.0                | 89.7                  | 5.38096            | 5.0                  | 16.7                  | 0.6513                   | 25.6                |
| sh-1        | 149.7             | 157.0             | 32.3                 | 31.1                  | 2.37628            | 4.2                  | 13.1                  | 0.8738                   | 15.0                |
| sh-2        | 149.8             | 157.0             | 32.4                 | 31.1                  | 2.37628            | 4.2                  | 13.1                  | 0.8738                   | 15.0                |
| sih3        | 164.3             | 170.0             | 46.9                 | 44.1                  | 2.38643            | 5.0                  | 18.5                  | 1.1476                   | 16.1                |
| sme-1       | 175.2             | 178.3             | 57.8                 | 52.4                  | 3.73153            | 4.4                  | 14.1                  | 0.8738                   | 16.1                |
| sme-2       | 176.0             | 180.4             | 58.6                 | 54.5                  | 3.73153            | 4.5                  | 14.6                  | 0.8738                   | 16.7                |
| tbu         | 217.3             | 210.9             | 99.9                 | 85.0                  | 3.15483            | 6.4                  | 27.0                  | 0.6513                   | 41.4                |

**Table 7ESI.** Parameters of helix fitted using HELFIT program<sup>1</sup> based on coordinates of eleven S-atoms of each screw and spring conformers of the substituted undecathiophenes. The helix equation is expressed as follows:  $x=a\cdot\cos(t)$ ;  $y=a\cdot\sin(t)$ ;  $z=b\cdot t$ , where  $a$  is the helix radius and pitch is defined as  $2\cdot\pi\cdot b$ ,  $a$  and pitch are in angstroms. Number of thiophene rings per turn is denoted as NTRT. Bond length alternation (BLA), defined as the difference between the average long and short C-C distances in the conjugated  $\pi$  system.

| Substituent      | belt  |       | screw |      |       |       | spring |      |       |  |
|------------------|-------|-------|-------|------|-------|-------|--------|------|-------|--|
|                  | BLA   | Pitch | NTRT  | a    | BLA   | Pitch | NTRT   | a    | BLA   |  |
| BF <sub>2</sub>  | 0.057 | 9.77  | 2.51  | 0.92 | 0.058 | 22.25 | 7.92   | 2.23 | 0.057 |  |
| BH <sub>2</sub>  | 0.051 | 9.33  | 2.40  | 0.95 | 0.052 | 23.26 | 7.84   | 2.01 | 0.054 |  |
| Br               | 0.047 |       |       |      |       | 21.48 | 9.32   | 3.49 | 0.050 |  |
| CBR <sub>3</sub> | 0.059 | 10.48 | 2.71  | 0.87 | 0.062 | 22.26 | 7.10   | 1.31 | 0.060 |  |
| CCH              | 0.047 |       |       |      |       | 17.37 | 10.63  | 4.85 | 0.048 |  |
| CCl <sub>3</sub> | 0.062 | 10.85 | 2.81  | 0.83 | 0.064 | 20.08 | 6.08   | 0.56 | 0.065 |  |
| CF <sub>3</sub>  | 0.053 | 9.67  | 2.47  | 0.93 | 0.055 | 23.05 | 8.45   | 2.51 | 0.053 |  |
| CH <sub>3</sub>  | 0.048 |       |       |      |       | 24.08 | 8.40   | 2.32 | 0.056 |  |
| CHO              | 0.056 | 9.72  | 2.50  | 0.95 | 0.042 | 6.07  | 10.27  | 5.16 | 0.040 |  |
| Cl               | 0.047 |       |       |      |       | 22.76 | 9.05   | 3.09 | 0.053 |  |
| CN               | 0.046 |       |       |      |       | 18.04 | 10.6   | 4.78 | 0.047 |  |
| COOH             | 0.059 | 8.86  | 2.27  | 1.00 | 0.049 | 16.01 | 9.44   | 4.09 | 0.053 |  |
| F                | 0.043 |       |       |      |       | 1.64  | 13.07  | 6.99 | 0.041 |  |
| H                | 0.048 |       |       |      |       | 25.08 | 10.71  | 4.17 | 0.063 |  |
| <i>i</i> Pr      | 0.060 | 9.88  | 2.54  | 0.94 | 0.062 | 22.21 | 6.87   | 1.24 | 0.059 |  |
| Li               | 0.061 | 9.29  | 2.37  | 1.04 | 0.063 | 25.79 | 7.33   | 0.84 | 0.064 |  |
| <i>n</i> Bu      | 0.051 | 10.01 | 2.57  | 0.92 | 0.063 | 21.92 | 6.63   | 1.05 | 0.050 |  |
| NH <sub>2</sub>  | 0.045 | 9.08  | 2.47  | 1.01 | 0.051 | 25.70 | 9.07   | 2.65 | 0.047 |  |
| NMe <sub>2</sub> | 0.051 |       |       |      |       | 20.71 | 10.05  | 4.16 | 0.055 |  |
| NO <sub>2</sub>  | 0.047 | 9.01  | 2.30  | 0.98 | 0.048 | 19.59 | 6.94   | 1.79 | 0.041 |  |
| OH               | 0.049 | 9.14  | 2.34  | 1.01 | 0.050 | 2.17  | 12.48  | 6.61 | 0.038 |  |
| OMe              | 0.039 |       |       |      |       | 3.14  | 12.10  | 6.36 | 0.059 |  |
| Ph               | 0.059 | 9.66  | 2.49  | 0.93 | 0.060 | 23.44 | 7.81   | 1.9  | 0.055 |  |
| SH               | 0.049 | 8.61  | 2.22  | 1.01 | 0.050 | 24.09 | 8.44   | 2.38 | 0.059 |  |
| SiH <sub>3</sub> | 0.055 | 9.47  | 2.43  | 0.96 | 0.057 | 23.77 | 7.77   | 1.81 | 0.056 |  |
| SMe              | 0.049 | 8.46  | 2.15  | 1.02 | 0.050 | 23.25 | 8.50   | 2.51 | 0.073 |  |
| <i>t</i> Bu      | 0.071 | 11.90 | 3.14  | 0.73 | 0.071 | 15.41 | 4.34   | 0.2  | 0.057 |  |

(1) P. Enkhbayar, S. Damdinsuren, M. Osaki and N. Matsushima, HELFIT: Helix fitting by a total least squares method, *Comp. Biol. Chem.*, 2008, **32**, 307–310.

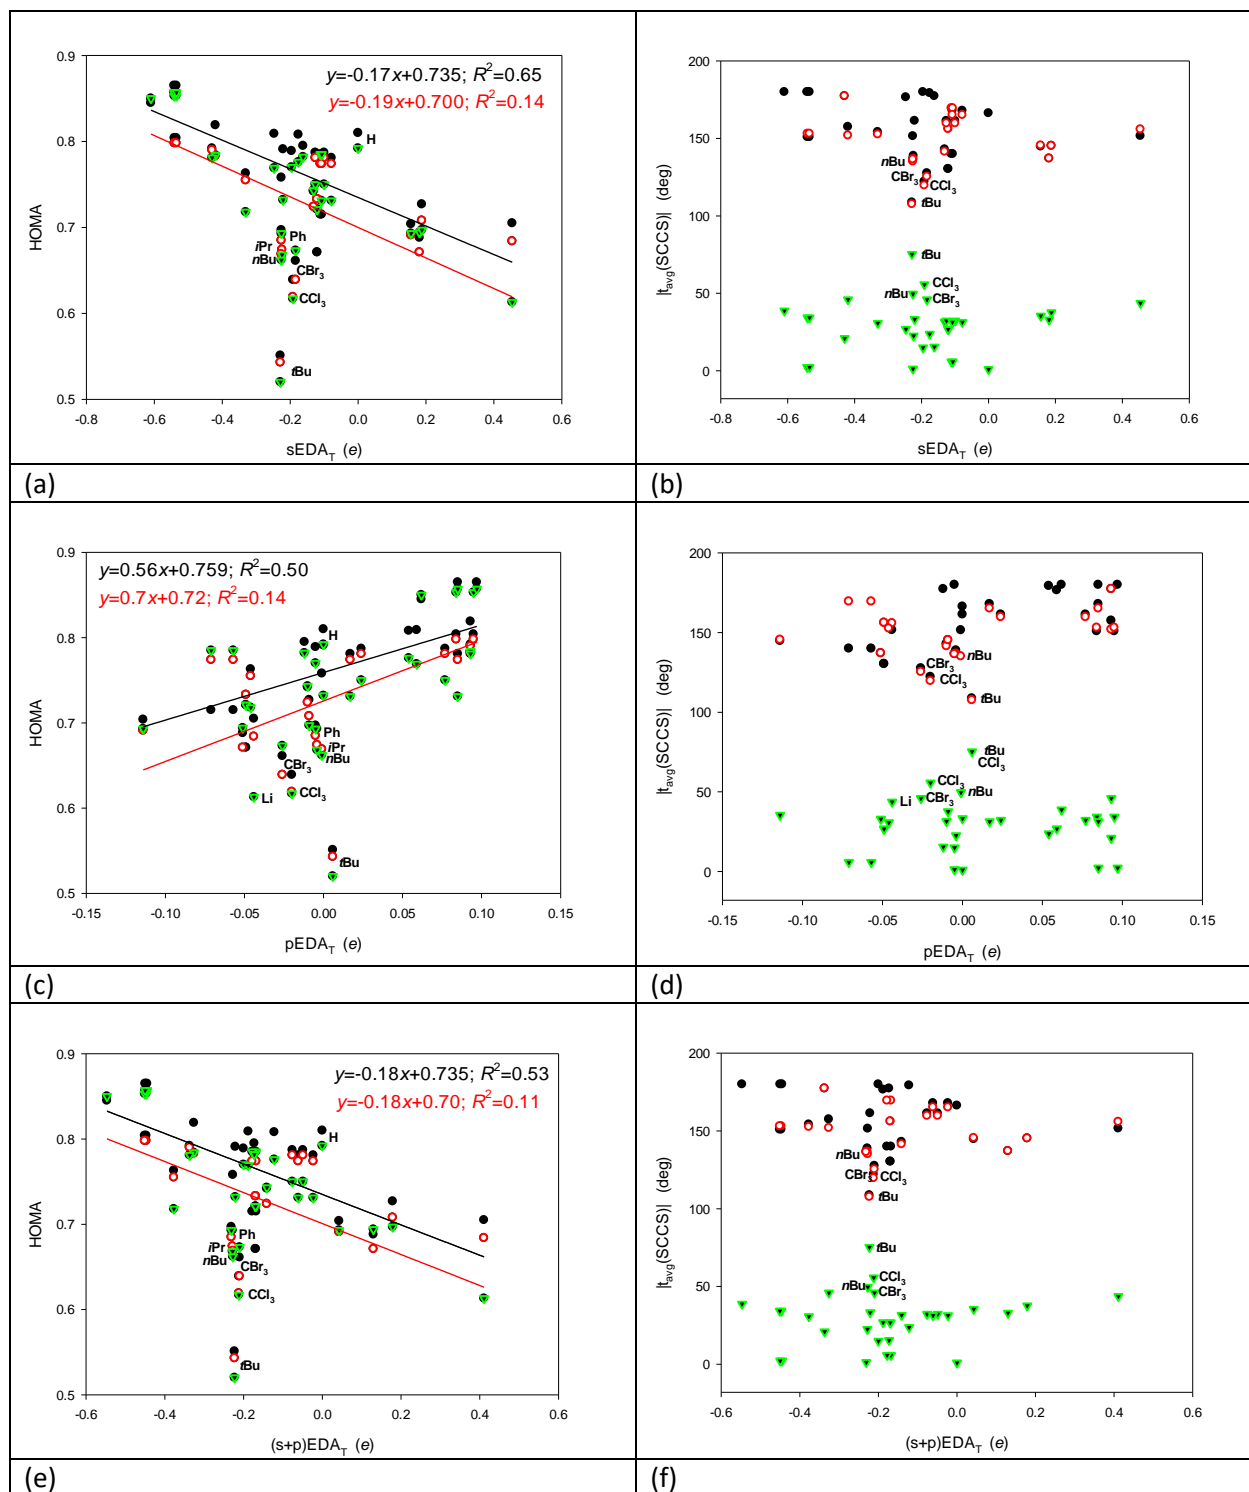

**Fig. 1ESI.** Correlations between substituent effect descriptors sEDAT (a, b), pEDAT (c,d) and (s+p)EDAT and HOMA index (a, c, e) and averaged module of the torsion SCCS angle (b, d, f) of the belt (black), screw (red) and spring (green) conformations of eleven substituted undecathiophenes

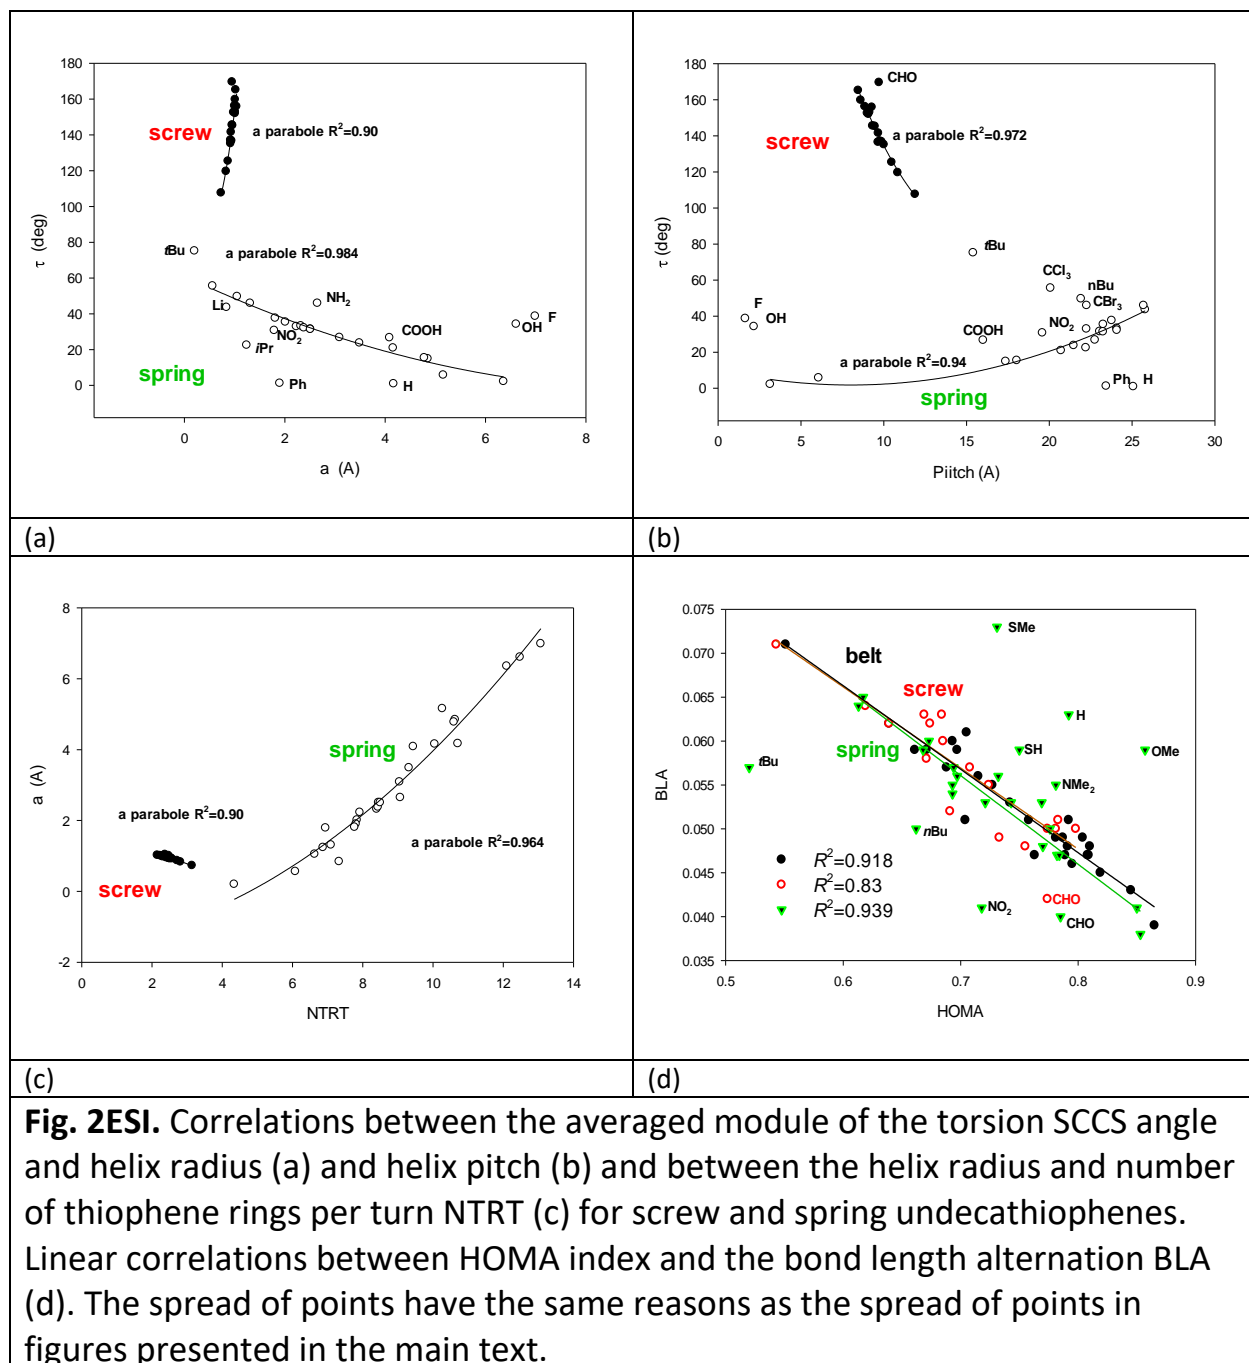

**Fig. 2ESI.** Correlations between the averaged module of the torsion SCCS angle and helix radius (a) and helix pitch (b) and between the helix radius and number of thiophene rings per turn NTRT (c) for screw and spring undecathiophenes. Linear correlations between HOMA index and the bond length alternation BLA (d). The spread of points have the same reasons as the spread of points in figures presented in the main text.

# BELTS XYZ

| BF <sub>2</sub> |              |             |             |
|-----------------|--------------|-------------|-------------|
| C               | 16.37615100  | 7.70657000  | -0.74432800 |
| C               | 16.57137500  | 7.24850100  | 0.52439600  |
| C               | 16.03269900  | 5.93739600  | 0.76498700  |
| C               | 15.41234000  | 5.42167200  | -0.37127000 |
| C               | 14.72247600  | 4.16143000  | -0.61548400 |
| C               | 14.77050000  | 3.39016200  | -1.75345400 |
| C               | 13.93739700  | 2.22828500  | -1.73393800 |
| C               | 13.21944500  | 2.13413100  | -0.54044300 |
| C               | 12.25981600  | 1.15189600  | -0.05815400 |
| C               | 12.12194900  | 0.68375700  | 1.22894000  |
| C               | 11.04558400  | -0.23524100 | 1.42713000  |
| C               | 10.33238500  | -0.45061400 | 0.24591100  |
| C               | 9.17666800   | -1.28039700 | -0.05814100 |
| C               | 8.93403800   | -1.97053200 | -1.22492500 |
| C               | 7.67871400   | -2.65037300 | -1.27673700 |
| C               | 6.93867700   | -2.44737400 | -0.11007500 |
| C               | 5.62573800   | -2.91952300 | 0.30242600  |
| C               | 5.23793400   | -3.30590500 | 1.56570200  |
| C               | 3.86086900   | -3.66542700 | 1.69264700  |
| C               | 3.18080600   | -3.52275700 | 0.48101800  |
| C               | 1.79384800   | -3.75576900 | 0.10911600  |
| C               | 1.32594100   | -4.24709500 | -1.08936700 |
| C               | -0.09656700  | -4.31020600 | -1.20388000 |
| C               | -0.72420600  | -3.82749400 | -0.05349300 |
| C               | -2.12794600  | -3.68921500 | 0.30266700  |
| C               | -2.69607700  | -3.88904700 | 1.54079300  |
| C               | -4.09727700  | -3.61969700 | 1.61468400  |
| C               | -4.59906400  | -3.17855700 | 0.38796400  |
| C               | -5.93457700  | -2.78598000 | -0.03423600 |
| C               | -6.51523700  | -3.00622300 | -1.26355600 |
| C               | -7.82214500  | -2.45242500 | -1.42399600 |
| C               | -8.23325500  | -1.77063500 | -0.27654500 |
| C               | -9.45856700  | -1.05449900 | 0.04296200  |
| C               | -10.10714100 | -1.01739000 | 1.25687800  |
| C               | -11.26338800 | -0.17922500 | 1.30050800  |
| C               | -11.48072900 | 0.45696000  | 0.07620700  |
| C               | -12.50493500 | 1.38934300  | -0.36887100 |
| C               | -13.07697900 | 1.46015000  | -1.61960000 |
| C               | -14.01665600 | 2.52198300  | -1.79568500 |
| C               | -14.14103800 | 3.29247300  | -0.63873000 |
| C               | -14.95752700 | 4.45865300  | -0.32747100 |
| C               | -15.59953000 | 4.73036900  | 0.85999600  |
| C               | -16.25403700 | 6.00198300  | 0.89642500  |
| C               | -16.07768200 | 6.68789200  | -0.28874600 |

|   |              |             |             |
|---|--------------|-------------|-------------|
| S | 15.49574800  | 6.55887100  | -1.69833300 |
| S | 13.57445800  | 3.47613000  | 0.51450100  |
| S | 10.99302100  | 0.48773700  | -1.06771000 |
| S | 7.79629400   | -1.42243600 | 1.01006000  |
| S | 4.24461800   | -2.94230500 | -0.77327800 |
| S | 0.44461200   | -3.30094500 | 1.12841000  |
| S | -3.33825900  | -3.09548900 | -0.81443500 |
| S | -7.00337700  | -1.81763600 | 0.95879300  |
| S | -10.25705800 | 0.01879100  | -1.08690600 |
| S | -13.09751400 | 2.70233000  | 0.62645900  |
| S | -15.14322500 | 5.81200200  | -1.43415600 |
| H | 16.69221400  | 8.64496400  | -1.17838000 |
| H | 17.10150700  | 7.81022200  | 1.28440500  |
| H | 15.42403700  | 3.62474700  | -2.58577700 |
| H | 12.80755200  | 0.95869600  | 2.02226300  |
| H | 9.66180700   | -2.02871500 | -2.02616300 |
| H | 5.93706100   | -3.37522100 | 2.39122700  |
| H | 1.98962200   | -4.60133900 | -1.86983400 |
| H | -2.13009000  | -4.26688600 | 2.38456100  |
| H | -6.03386100  | -3.59554900 | -2.03559500 |
| H | -9.78946600  | -1.61622300 | 2.10275600  |
| H | -12.86296500 | 0.73617900  | -2.39755700 |
| H | -15.62293100 | 4.02612700  | 1.68390200  |
| H | -16.46641000 | 7.66446800  | -0.54545500 |
| B | -17.06459600 | 6.55299100  | 2.08469600  |
| B | -14.82904500 | 2.62800500  | -3.10432500 |
| B | -12.15488600 | -0.16683800 | 2.56073400  |
| B | -8.63507700  | -2.75211700 | -2.70167700 |
| B | -4.87389000  | -3.94327700 | 2.90906200  |
| B | -0.74294400  | -4.97453300 | -2.43845900 |
| B | 3.33817900   | -4.25232700 | 3.02135500  |
| B | 7.34923300   | -3.57253000 | -2.47011000 |
| B | 10.87529900  | -0.93689800 | 2.79132300  |
| B | 14.00861000  | 1.20726000  | -2.88857400 |
| B | 16.27636200  | 5.23426000  | 2.11583900  |
| F | 15.94477500  | 3.97236400  | 2.36666400  |
| F | 16.87192400  | 5.89826300  | 3.10368800  |
| F | 14.74167000  | 1.48454600  | -3.96378800 |
| F | 13.38989000  | 0.03210500  | -2.87892000 |
| F | 8.17891500   | -3.61938800 | -3.50846100 |
| F | 6.27861300   | -4.35583200 | -2.52803500 |
| F | 0.02636800   | -5.35632100 | -3.45381700 |
| F | -2.04362000  | -5.21490300 | -2.55405300 |
| F | -8.05764700  | -3.40604300 | -3.70553300 |
| F | -9.90758200  | -2.41128300 | -2.86702300 |
| F | -14.55489800 | 1.80387800  | -4.11179800 |
| F | -15.81734600 | 3.49324000  | -3.29457900 |
| F | -17.64121200 | 7.74921900  | 2.03534700  |

|                 |              |             |             |
|-----------------|--------------|-------------|-------------|
| F               | -17.21311800 | 5.84972100  | 3.20179700  |
| F               | -13.32425800 | 0.45736600  | 2.63695000  |
| F               | -11.76106300 | -0.82907700 | 3.64487800  |
| F               | -6.19498400  | -3.86966900 | 3.01995300  |
| F               | -4.20681500  | -4.33986000 | 3.98909300  |
| F               | 2.11948000   | -4.75463700 | 3.18149600  |
| F               | 4.14070400   | -4.28743600 | 4.08119700  |
| F               | 10.00062400  | -1.90930400 | 3.02169000  |
| F               | 11.64978600  | -0.57876200 | 3.81152300  |
| BH <sub>2</sub> |              |             |             |
| C               | 17.83079900  | 6.13638700  | -0.14301100 |
| C               | 17.82970100  | 5.58885400  | 1.10252600  |
| C               | 16.99375300  | 4.42208000  | 1.24735700  |
| C               | 16.34535300  | 4.12271800  | 0.03875100  |
| C               | 15.40590100  | 3.07178300  | -0.30941100 |
| C               | 15.24852400  | 2.44918600  | -1.52527400 |
| C               | 14.20535200  | 1.46895200  | -1.59251100 |
| C               | 13.53255400  | 1.37561100  | -0.36051900 |
| C               | 12.41932100  | 0.54744400  | 0.05936900  |
| C               | 12.15572700  | 0.06582800  | 1.32147800  |
| C               | 10.95038300  | -0.69550200 | 1.45751100  |
| C               | 10.26496200  | -0.76325100 | 0.23042100  |
| C               | 9.01686200   | -1.40380200 | -0.13230200 |
| C               | 8.66127400   | -1.92307000 | -1.35670900 |
| C               | 7.33799800   | -2.46290500 | -1.44290500 |
| C               | 6.66064000   | -2.31440100 | -0.21816100 |
| C               | 5.32082700   | -2.69061600 | 0.18495200  |
| C               | 4.88831200   | -3.03917000 | 1.44471200  |
| C               | 3.49068600   | -3.32408900 | 1.56593000  |
| C               | 2.84053000   | -3.15410400 | 0.32926200  |
| C               | 1.45121700   | -3.31439000 | -0.04886400 |
| C               | 0.94979500   | -3.68440900 | -1.27651400 |
| C               | -0.47757100  | -3.72222600 | -1.37954300 |
| C               | -1.07337900  | -3.33357100 | -0.16494500 |
| C               | -2.46421600  | -3.20755100 | 0.22006900  |
| C               | -3.00675400  | -3.36668200 | 1.47550600  |
| C               | -4.41615000  | -3.13846700 | 1.57769900  |
| C               | -4.94983400  | -2.76393600 | 0.33027600  |
| C               | -6.30154600  | -2.42765100 | -0.06787100 |
| C               | -6.88533500  | -2.60896000 | -1.30153500 |
| C               | -8.23305600  | -2.14274400 | -1.42631600 |
| C               | -8.66919400  | -1.55750300 | -0.22282800 |
| C               | -9.93097900  | -0.94439200 | 0.13861400  |
| C               | -10.51511100 | -0.89178700 | 1.38427300  |
| C               | -11.75331700 | -0.17745900 | 1.46067100  |
| C               | -12.09830800 | 0.35336500  | 0.20379700  |
| C               | -13.23565700 | 1.14554600  | -0.21932100 |
| C               | -13.82656600 | 1.17171600  | -1.46260100 |

|   |              |             |             |
|---|--------------|-------------|-------------|
| C | -14.91753900 | 2.08705400  | -1.61199300 |
| C | -15.13259900 | 2.80083000  | -0.42010300 |
| C | -16.10004800 | 3.83061700  | -0.08558100 |
| C | -16.69449600 | 4.06621100  | 1.13322200  |
| C | -17.56478100 | 5.20711500  | 1.16980800  |
| C | -17.59207200 | 5.83042300  | -0.07073000 |
| S | 16.76924500  | 5.26812700  | -1.21067900 |
| S | 14.19002600  | 2.48178300  | 0.81362200  |
| S | 11.10915400  | 0.10189000  | -1.02437400 |
| S | 7.65610100   | -1.52408200 | 0.97382400  |
| S | 3.95125800   | -2.65283300 | -0.91631100 |
| S | 0.12279600   | -2.93646700 | 1.03837500  |
| S | -3.71921100  | -2.70134000 | -0.90186600 |
| S | -7.42577300  | -1.59608600 | 0.99726200  |
| S | -10.90570100 | -0.03343300 | -1.00592900 |
| S | -14.00621500 | 2.33342900  | 0.82192400  |
| S | -16.60800900 | 5.05977900  | -1.24468700 |
| H | 18.37748100  | 6.99506600  | -0.50752900 |
| H | 18.42177300  | 5.97924300  | 1.92251300  |
| H | 15.89944900  | 2.65326200  | -2.36827900 |
| H | 12.83864100  | 0.21180300  | 2.15116000  |
| H | 9.35340800   | -1.96528600 | -2.19055900 |
| H | 5.56850300   | -3.13878000 | 2.28348800  |
| H | 1.59212800   | -3.97566400 | -2.10038200 |
| H | -2.41538900  | -3.69070800 | 2.32491600  |
| H | -6.37644300  | -3.11560100 | -2.11425300 |
| H | -10.09122500 | -1.39845300 | 2.24438400  |
| H | -13.51937800 | 0.50867800  | -2.26397900 |
| H | -16.53617000 | 3.42145900  | 1.99079000  |
| H | -18.16316000 | 6.70855600  | -0.34339700 |
| B | -18.37304000 | 5.70464500  | 2.37156500  |
| H | -19.06190400 | 6.67479800  | 2.26461100  |
| H | -18.32156200 | 5.13210000  | 3.41872200  |
| B | -15.77093000 | 2.13195900  | -2.88359800 |
| H | -16.76941200 | 2.77592100  | -2.95958000 |
| H | -15.43376500 | 1.47643000  | -3.82390200 |
| B | -12.59164500 | -0.15074700 | 2.74212500  |
| H | -12.13609000 | -0.63468900 | 3.73498100  |
| H | -13.68780600 | 0.31217700  | 2.78008600  |
| B | -9.06200100  | -2.40207300 | -2.68768000 |
| H | -10.22476200 | -2.15457300 | -2.75188000 |
| H | -8.52487600  | -2.89436100 | -3.63460200 |
| B | -5.18496700  | -3.41337100 | 2.87341000  |
| H | -4.56807700  | -3.70528800 | 3.85411000  |
| H | -6.37312200  | -3.37086300 | 2.93461300  |
| B | -1.18118000  | -4.24982600 | -2.63323000 |
| H | -0.51958600  | -4.51707900 | -3.59157100 |
| H | -2.35763600  | -4.42609000 | -2.68113000 |



|    |              |             |             |
|----|--------------|-------------|-------------|
| B  | 2.88786600   | -3.86124800 | 2.86724600  |
| H  | 3.58255400   | -3.92294900 | 3.83739000  |
| H  | 1.76218200   | -4.24137800 | 2.94292800  |
| B  | 6.84817300   | -3.20106300 | -2.69190300 |
| H  | 7.54719500   | -3.21420000 | -3.66082900 |
| H  | 5.80932200   | -3.78172300 | -2.72653500 |
| B  | 10.59419900  | -1.41491900 | 2.76136600  |
| H  | 9.67679400   | -2.16911100 | 2.84675800  |
| H  | 11.27837400  | -1.22991500 | 3.72339200  |
| B  | 13.99905800  | 0.59291200  | -2.83053100 |
| H  | 13.23772800  | -0.32252500 | -2.84802000 |
| H  | 14.64476200  | 0.82203200  | -3.80981600 |
| B  | 16.96166000  | 3.60080000  | 2.53728000  |
| H  | 17.55332900  | 4.00683300  | 3.49354900  |
| H  | 16.39026900  | 2.55875600  | 2.61906500  |
| Br |              |             |             |
| C  | -21.62267600 | 0.01189000  | 0.07543200  |
| C  | -21.16557100 | -1.26929300 | -0.01135000 |
| C  | -19.74315100 | -1.33088600 | -0.03164900 |
| C  | -19.10349200 | -0.10832400 | 0.03834200  |
| C  | -17.70581800 | 0.26734200  | 0.04487300  |
| C  | -17.20553100 | 1.55162000  | 0.10078500  |
| C  | -15.79451000 | 1.60708000  | 0.09797100  |
| C  | -15.16136900 | 0.37959900  | 0.04040600  |
| C  | -13.76890500 | -0.00068600 | 0.01947100  |
| C  | -13.27203600 | -1.28854700 | -0.02474700 |
| C  | -11.86221200 | -1.34763300 | -0.03825900 |
| C  | -11.22400900 | -0.12110400 | -0.00546500 |
| C  | -9.83098900  | 0.25519800  | -0.00552400 |
| C  | -9.33137200  | 1.54296900  | 0.01162200  |
| C  | -7.92175800  | 1.59983200  | 0.01188300  |
| C  | -7.28546300  | 0.37178600  | -0.00465600 |
| C  | -5.89294800  | -0.00571500 | -0.00888600 |
| C  | -5.39356100  | -1.29378900 | -0.01192000 |
| C  | -3.98391900  | -1.35085400 | -0.01761500 |
| C  | -3.34734000  | -0.12285000 | -0.01952400 |
| C  | -1.95500700  | 0.25516400  | -0.02512800 |
| C  | -1.45685800  | 1.54358200  | -0.04209800 |
| C  | -0.04733000  | 1.60217700  | -0.03987800 |
| C  | 0.59065500   | 0.37503900  | -0.02100900 |
| C  | 1.98354300   | -0.00088400 | -0.01193600 |
| C  | 2.48417200   | -1.28807300 | 0.01709700  |
| C  | 3.89392900   | -1.34390000 | 0.01823300  |
| C  | 4.52958200   | -0.11577400 | -0.00992400 |
| C  | 5.92165400   | 0.26337100  | -0.01874900 |
| C  | 6.41900300   | 1.55148100  | -0.05615900 |
| C  | 7.82868200   | 1.61107700  | -0.05409900 |
| C  | 8.46760500   | 0.38503600  | -0.01523400 |

|                  |              |             |             |
|------------------|--------------|-------------|-------------|
| C                | 9.86085200   | 0.00972500  | -0.00015000 |
| C                | 10.36198800  | -1.27647700 | 0.04168100  |
| C                | 11.77220100  | -1.33160900 | 0.04725900  |
| C                | 12.40736400  | -0.10391200 | 0.01020800  |
| C                | 13.79995800  | 0.27655900  | 0.00233700  |
| C                | 14.29681700  | 1.56374800  | -0.03325600 |
| C                | 15.70799800  | 1.62285800  | -0.03345900 |
| C                | 16.34631900  | 0.39825300  | 0.00133600  |
| C                | 17.74341200  | 0.01955700  | 0.01194100  |
| C                | 18.24096800  | -1.26939100 | 0.03302600  |
| C                | 19.65770300  | -1.31368700 | 0.04206200  |
| C                | 20.25440600  | -0.08616200 | 0.02816900  |
| S                | -20.32659100 | 1.15890500  | 0.13435200  |
| S                | -16.38424100 | -0.88985300 | -0.01471900 |
| S                | -12.44183500 | 1.15329300  | 0.04643500  |
| S                | -8.50575100  | -0.90146600 | -0.02375800 |
| S                | -4.56730000  | 1.15073900  | -0.01181000 |
| S                | -0.62810300  | -0.89982900 | -0.00752900 |
| S                | 3.30838300   | 1.15643900  | -0.03757000 |
| S                | 7.24964200   | -0.89015700 | 0.01927600  |
| S                | 11.18575500  | 1.16719600  | -0.03341300 |
| S                | 15.12922700  | -0.87590000 | 0.03739800  |
| S                | 19.07144000  | 1.17870000  | 0.00273100  |
| H                | -22.64666800 | 0.35623800  | 0.10907500  |
| H                | -21.79717200 | -2.14652600 | -0.06006000 |
| H                | -17.82116600 | 2.44090800  | 0.14278100  |
| H                | -13.89061900 | -2.17644100 | -0.04655900 |
| H                | -9.94836200  | 2.43213600  | 0.02321600  |
| H                | -6.01078400  | -2.18287400 | -0.00937200 |
| H                | -2.07495000  | 2.43194200  | -0.05652200 |
| H                | 1.86778000   | -2.17750100 | 0.03786600  |
| H                | 5.80043300   | 2.43917500  | -0.08504100 |
| H                | 9.74618600   | -2.16619100 | 0.06826500  |
| H                | 13.67887600  | 2.45202400  | -0.05891500 |
| H                | 17.62344200  | -2.15839800 | 0.04100900  |
| H                | 21.30842400  | 0.14828700  | 0.02980600  |
| Br               | -18.86839300 | -3.00759200 | -0.14972100 |
| Br               | -14.91408000 | 3.28417600  | 0.17109100  |
| Br               | -10.98580500 | -3.02741800 | -0.09848100 |
| Br               | -7.04288400  | 3.27939000  | 0.03401000  |
| Br               | -3.10463300  | -3.03038900 | -0.02169200 |
| Br               | 0.82955100   | 3.28291500  | -0.06286400 |
| Br               | 4.77427300   | -3.02259100 | 0.05777800  |
| Br               | 8.70409800   | 3.29226100  | -0.10406500 |
| Br               | 12.65245900  | -3.01027200 | 0.10418700  |
| Br               | 16.58135000  | 3.30635500  | -0.08087600 |
| Br               | 20.62425300  | -2.94667000 | 0.06952900  |
| CBr <sub>3</sub> |              |             |             |

|   |              |             |             |
|---|--------------|-------------|-------------|
| C | -14.66501900 | 9.30094200  | 1.63715900  |
| C | -15.13361500 | 8.98830600  | 0.39631300  |
| C | -14.94166700 | 7.61209400  | 0.04133700  |
| C | -14.29676300 | 6.89483600  | 1.04555100  |
| C | -13.87914600 | 5.50120200  | 1.18034400  |
| C | -14.13113400 | 4.69612700  | 2.26501000  |
| C | -13.54697100 | 3.39696200  | 2.19056400  |
| C | -12.80260800 | 3.22641300  | 1.02412000  |
| C | -12.04525500 | 2.11230700  | 0.46202900  |
| C | -12.11588900 | 1.68920100  | -0.84508900 |
| C | -11.21777700 | 0.63385900  | -1.17887400 |
| C | -10.42111200 | 0.26534900  | -0.09528200 |
| C | -9.38962500  | -0.74693700 | 0.10690600  |
| C | -9.30830500  | -1.58053700 | 1.19858700  |
| C | -8.15969100  | -2.42402200 | 1.21966200  |
| C | -7.33061200  | -2.20245600 | 0.12073200  |
| C | -6.07855000  | -2.79712200 | -0.33618400 |
| C | -5.82007100  | -3.20547200 | -1.62410100 |
| C | -4.49242300  | -3.67599100 | -1.84397100 |
| C | -3.71179000  | -3.59124300 | -0.69165200 |
| C | -2.33293100  | -3.94783900 | -0.37320100 |
| C | -1.93499700  | -4.62387300 | 0.75709800  |
| C | -0.52445900  | -4.77319300 | 0.89600400  |
| C | 0.16908900   | -4.16513900 | -0.14931200 |
| C | 1.58410300   | -4.04186700 | -0.48522600 |
| C | 2.12650200   | -4.27033400 | -1.72843300 |
| C | 3.52231300   | -3.99762500 | -1.82770000 |
| C | 4.04625600   | -3.51750500 | -0.62796700 |
| C | 5.38060900   | -3.11649500 | -0.19377000 |
| C | 5.96758200   | -3.48749400 | 0.99406100  |
| C | 7.23991600   | -2.89379200 | 1.24017400  |
| C | 7.61397700   | -2.02188400 | 0.21882300  |
| C | 8.79421400   | -1.19731200 | -0.02070400 |
| C | 9.48851700   | -1.13188600 | -1.20609700 |
| C | 10.55945100  | -0.19074300 | -1.21642400 |
| C | 10.65666700  | 0.50213100  | -0.00993900 |
| C | 11.56598300  | 1.52239100  | 0.50228600  |
| C | 12.14177000  | 1.50594200  | 1.75200900  |
| C | 12.93070200  | 2.65303900  | 2.05815600  |
| C | 12.92742000  | 3.58006000  | 1.01816800  |
| C | 13.57567100  | 4.87474500  | 0.81870900  |
| C | 14.29323100  | 5.24222300  | -0.29221700 |
| C | 14.72293100  | 6.60676600  | -0.26964100 |
| C | 14.30337600  | 7.26224900  | 0.85997400  |
| S | -13.94981100 | 7.93354500  | 2.40751200  |
| S | -12.84444500 | 4.66928900  | 0.04723400  |
| S | -10.79841900 | 1.22990200  | 1.30681100  |
| S | -7.98680600  | -0.96022300 | -0.91073900 |

|    |              |             |             |
|----|--------------|-------------|-------------|
| S  | -4.63465100  | -2.93767700 | 0.63482400  |
| S  | -0.93389800  | -3.42748300 | -1.27936000 |
| S  | 2.80676200   | -3.41780200 | 0.59337300  |
| S  | 6.39179000   | -1.95796500 | -1.02164700 |
| S  | 9.42861600   | -0.02723300 | 1.10823300  |
| S  | 11.95612300  | 3.01611600  | -0.31324000 |
| S  | 13.39518100  | 6.24377100  | 1.91003300  |
| H  | -14.70488000 | 10.25697800 | 2.13972400  |
| H  | -15.61914900 | 9.70141700  | -0.25406500 |
| H  | -14.75782000 | 5.01286400  | 3.08624300  |
| H  | -12.82795500 | 2.09979100  | -1.54659500 |
| H  | -10.07965200 | -1.61710000 | 1.95463200  |
| H  | -6.58000200  | -3.20732400 | -2.39249700 |
| H  | -2.64231900  | -5.04212600 | 1.45882000  |
| H  | 1.54474800   | -4.66636100 | -2.54849000 |
| H  | 5.51381200   | -4.20517100 | 1.66271500  |
| H  | 9.26332300   | -1.77730900 | -2.04311300 |
| H  | 12.03626800  | 0.66706000  | 2.42514500  |
| H  | 14.53111800  | 4.55506000  | -1.09427500 |
| H  | 14.49620900  | 8.28976000  | 1.12982900  |
| C  | 15.54984700  | 7.19567200  | -1.36459200 |
| C  | 13.64992300  | 2.81331500  | 3.36760800  |
| C  | 11.45282600  | 0.00401500  | -2.40820200 |
| C  | 8.04437500   | -3.18939900 | 2.47379400  |
| C  | 4.29839300   | -4.20804400 | -3.09628700 |
| C  | 0.10005000   | -5.49491500 | 2.05584000  |
| C  | -4.02713700  | -4.18725500 | -3.17738300 |
| C  | -7.90321400  | -3.41177200 | 2.32194500  |
| C  | -11.16074900 | 0.02565200  | -2.55099900 |
| C  | -15.37476100 | 7.05273400  | -1.28336200 |
| C  | -13.73090300 | 2.36630700  | 3.26707300  |
| Br | -16.66259500 | 8.22274500  | -2.22073700 |
| Br | -16.24982100 | 5.29201200  | -1.12461200 |
| Br | -13.80448600 | 6.86409600  | -2.49528200 |
| Br | -15.19092900 | 2.81664000  | 4.51923500  |
| Br | -14.15754300 | 0.58055200  | 2.54337300  |
| Br | -12.07690700 | 2.22041100  | 4.36739000  |
| Br | -12.71456300 | 0.50646000  | -3.66913300 |
| Br | -9.54897000  | 0.68121300  | -3.52061500 |
| Br | -11.10216500 | -1.94634600 | -2.50558800 |
| Br | -5.51785400  | -4.56454600 | -4.41582300 |
| Br | -2.88599700  | -2.82277700 | -4.07301500 |
| Br | -2.99556400  | -5.86289700 | -3.02989000 |
| Br | -7.32740900  | -5.17329400 | 1.64601000  |
| Br | -6.49417700  | -2.71664900 | 3.54636000  |
| Br | -9.49634700  | -3.74211800 | 3.44033200  |
| Br | -1.19618700  | -6.59478300 | 3.06049100  |
| Br | 0.84556300   | -4.18090600 | 3.35367700  |

|     |             |             |             |
|-----|-------------|-------------|-------------|
| Br  | 1.54784800  | -6.71513300 | 1.50297800  |
| Br  | 3.32180500  | -5.30105500 | -4.41939400 |
| Br  | 4.66115000  | -2.45773700 | -3.97426300 |
| Br  | 6.02056200  | -5.12052800 | -2.78903500 |
| Br  | 11.28221000 | -1.44392100 | -3.73990900 |
| Br  | 10.97451600 | 1.69105300  | -3.35210400 |
| Br  | 13.36273300 | 0.08039100  | -1.91986500 |
| Br  | 9.95293700  | -3.49833700 | 2.08320500  |
| Br  | 7.90326900  | -1.67468000 | 3.75981600  |
| Br  | 7.40980800  | -4.79430800 | 3.43339000  |
| Br  | 13.80279000 | 1.11512700  | 4.36624800  |
| Br  | 12.64656300 | 4.06783600  | 4.54550300  |
| Br  | 15.48564000 | 3.49499800  | 3.15147900  |
| Br  | 14.60961400 | 7.02015700  | -3.10088500 |
| Br  | 17.26999800 | 6.21819900  | -1.51845000 |
| Br  | 15.95788200 | 9.09551100  | -1.08709000 |
| CCH |             |             |             |
| C   | 21.26922800 | 0.07059700  | 0.00001300  |
| C   | 20.79331500 | 1.34505500  | 0.00000900  |
| C   | 19.35787700 | 1.41543000  | 0.00000500  |
| C   | 18.75645500 | 0.15615600  | 0.00000700  |
| C   | 17.36124500 | -0.22280000 | 0.00000500  |
| C   | 16.84962800 | -1.50164100 | 0.00000500  |
| C   | 15.42663400 | -1.57090200 | 0.00000300  |
| C   | 14.82675600 | -0.30887000 | 0.00000100  |
| C   | 13.43464700 | 0.06846400  | 0.00000000  |
| C   | 12.92196200 | 1.34870900  | -0.00000100 |
| C   | 11.50016600 | 1.41785500  | -0.00000300 |
| C   | 10.89922600 | 0.15547800  | -0.00000400 |
| C   | 9.50745300  | -0.22080100 | -0.00000500 |
| C   | 8.99434400  | -1.50120200 | -0.00000500 |
| C   | 7.57281600  | -1.57018100 | -0.00000700 |
| C   | 6.97181200  | -0.30765000 | -0.00000800 |
| C   | 5.58011800  | 0.06835900  | -0.00001100 |
| C   | 5.06658600  | 1.34866500  | -0.00001800 |
| C   | 3.64506800  | 1.41722800  | -0.00001800 |
| C   | 3.04438600  | 0.15449800  | -0.00001000 |
| C   | 1.65289100  | -0.22210300 | -0.00000800 |
| C   | 1.14014800  | -1.50272500 | -0.00000800 |
| C   | -0.28129500 | -1.57223600 | -0.00000400 |
| C   | -0.88285000 | -0.30989800 | -0.00000100 |
| C   | -2.27464300 | 0.06557000  | 0.00000300  |
| C   | -2.78871100 | 1.34564000  | 0.00001200  |
| C   | -4.21027600 | 1.41369200  | 0.00001500  |
| C   | -4.81053500 | 0.15073900  | 0.00000700  |
| C   | -6.20187200 | -0.22648700 | 0.00000800  |
| C   | -6.71406400 | -1.50723300 | 0.00001200  |
| C   | -8.13556300 | -1.57743500 | 0.00001100  |

|   |              |             |             |
|---|--------------|-------------|-------------|
| C | -8.73773700  | -0.31542700 | 0.00000600  |
| C | -10.12979700 | 0.05957700  | 0.00000500  |
| C | -10.64450900 | 1.33912500  | 0.00000500  |
| C | -12.06642600 | 1.40641200  | 0.00000400  |
| C | -12.66588000 | 0.14339100  | 0.00000200  |
| C | -14.05754200 | -0.23526200 | 0.00000100  |
| C | -14.56897400 | -1.51547100 | 0.00000200  |
| C | -15.99167000 | -1.58549400 | 0.00000000  |
| C | -16.59334600 | -0.32499000 | -0.00000200 |
| C | -17.98921900 | 0.05264100  | -0.00000400 |
| C | -18.50152500 | 1.33393700  | 0.00000400  |
| C | -19.92987900 | 1.39121500  | -0.00000200 |
| C | -20.49179400 | 0.13085900  | -0.00001400 |
| S | 19.98625500  | -1.09649700 | 0.00001300  |
| S | 16.04923100  | 0.94846400  | 0.00000300  |
| S | 12.12087200  | -1.10256200 | -0.00000200 |
| S | 8.19352000   | 0.95037600  | -0.00000600 |
| S | 4.26644400   | -1.10317900 | -0.00000200 |
| S | 0.33840400   | 0.94859700  | -0.00000400 |
| S | -3.58797700  | -1.10646600 | -0.00000400 |
| S | -7.51705500  | 0.94359300  | 0.00000400  |
| S | -11.44282700 | -1.11303400 | 0.00000300  |
| S | -15.37406600 | 0.93338700  | -0.00000300 |
| S | -19.30613000 | -1.11968400 | -0.00001800 |
| H | 22.29756100  | -0.26201100 | 0.00001600  |
| H | 21.41902900  | 2.22881600  | 0.00000800  |
| H | 17.46521900  | -2.39302500 | 0.00000600  |
| H | 13.53786700  | 2.23973600  | 0.00000000  |
| H | 9.61019300   | -2.39225600 | -0.00000400 |
| H | 5.68220600   | 2.23987700  | -0.00002400 |
| H | 1.75632700   | -2.39355200 | -0.00001100 |
| H | -2.17344400  | 2.23710500  | 0.00001800  |
| H | -6.09752500  | -2.39782500 | 0.00001600  |
| H | -10.02982600 | 2.23101800  | 0.00000700  |
| H | -13.95266200 | -2.40625800 | 0.00000400  |
| H | -17.88493100 | 2.22457200  | 0.00001400  |
| H | -21.54379100 | -0.11616500 | -0.00002000 |
| C | -16.67878400 | -2.82954300 | 0.00000100  |
| C | -17.21511600 | -3.91525500 | 0.00000200  |
| H | -17.70726800 | -4.86021000 | 0.00001000  |
| C | -20.67950500 | 2.60217600  | 0.00000400  |
| C | -21.30833400 | 3.63580500  | 0.00000800  |
| H | -21.86544900 | 4.54378300  | 0.00001100  |
| C | -12.75668600 | 2.64843000  | 0.00000400  |
| C | -13.29469300 | 3.73342800  | 0.00000400  |
| H | -13.78807600 | 4.67780600  | 0.00000200  |
| C | -8.82311900  | -2.82088800 | 0.00001400  |
| C | -9.35837500  | -3.90726100 | 0.00001700  |

|                  |              |             |             |
|------------------|--------------|-------------|-------------|
| H                | -9.84896700  | -4.85309700 | 0.00001900  |
| C                | -4.89996400  | 2.65594200  | 0.00002400  |
| C                | -5.43735200  | 3.74126200  | 0.00003300  |
| H                | -5.92951600  | 4.68629400  | 0.00003900  |
| C                | -0.96960200  | -2.81524700 | -0.00000400 |
| C                | -1.50562900  | -3.90123800 | -0.00000400 |
| H                | -1.99649700  | -4.84694900 | -0.00000500 |
| C                | 2.95578800   | 2.65969400  | -0.00002500 |
| C                | 2.41874700   | 3.74518300  | -0.00003100 |
| H                | 1.92713100   | 4.69051000  | -0.00003800 |
| C                | 6.88401400   | -2.81290700 | -0.00000700 |
| C                | 6.34754700   | -3.89867800 | -0.00000700 |
| H                | 5.85649700   | -4.84430400 | -0.00001000 |
| C                | 10.81142100  | 2.66059000  | -0.00000300 |
| C                | 10.27488300  | 3.74633400  | -0.00000400 |
| H                | 9.78379800   | 4.69194200  | -0.00000500 |
| C                | 14.73822300  | -2.81368800 | 0.00000200  |
| C                | 14.20242700  | -3.89981800 | 0.00000200  |
| H                | 13.71247700  | -4.84602400 | 0.00000100  |
| C                | 18.66945600  | 2.65720500  | 0.00000100  |
| C                | 18.13599500  | 3.74480100  | -0.00000300 |
| H                | 17.64693800  | 4.69143300  | -0.00000700 |
| CCl <sub>3</sub> |              |             |             |
| C                | -12.89780000 | 9.51489100  | 0.98386400  |
| C                | -13.49671500 | 9.19721700  | -0.19909100 |
| C                | -13.56222800 | 7.78670000  | -0.44252000 |
| C                | -12.97920100 | 7.04503400  | 0.57822200  |
| C                | -12.77528200 | 5.61272100  | 0.79616900  |
| C                | -13.14824400 | 4.90700200  | 1.91413000  |
| C                | -12.75578300 | 3.53559300  | 1.90262600  |
| C                | -12.03636800 | 3.20308200  | 0.75941800  |
| C                | -11.42296300 | 1.96719800  | 0.27529700  |
| C                | -11.60959100 | 1.41323800  | -0.96881100 |
| C                | -10.82945000 | 0.24555400  | -1.21555700 |
| C                | -10.00314600 | -0.07276500 | -0.14262100 |
| C                | -9.03445900  | -1.13900800 | 0.10662100  |
| C                | -9.00325500  | -1.94918300 | 1.21672500  |
| C                | -7.90380300  | -2.85639500 | 1.25190400  |
| C                | -7.06007000  | -2.70443100 | 0.15609500  |
| C                | -5.82716300  | -3.36538200 | -0.26830900 |
| C                | -5.59271500  | -3.90602200 | -1.51044700 |
| C                | -4.27637100  | -4.42474900 | -1.68681300 |
| C                | -3.48181100  | -4.24038000 | -0.55953400 |
| C                | -2.09974500  | -4.58168200 | -0.22728800 |
| C                | -1.69177000  | -5.24158200 | 0.90783600  |
| C                | -0.27821600  | -5.37651500 | 1.03390100  |
| C                | 0.40435800   | -4.77188300 | -0.01669300 |
| C                | 1.82031600   | -4.62446700 | -0.34918100 |

|   |              |             |             |
|---|--------------|-------------|-------------|
| C | 2.39855500   | -4.93947500 | -1.55590900 |
| C | 3.78632500   | -4.62354400 | -1.64283900 |
| C | 4.26294100   | -4.01946700 | -0.48367500 |
| C | 5.57086600   | -3.51356900 | -0.07089400 |
| C | 6.21591300   | -3.82617700 | 1.10215900  |
| C | 7.44647000   | -3.13359500 | 1.29890400  |
| C | 7.72300600   | -2.24587300 | 0.26392500  |
| C | 8.82264700   | -1.32178900 | -0.00821000 |
| C | 9.54027600   | -1.25342300 | -1.17867300 |
| C | 10.51189200  | -0.21031900 | -1.21233700 |
| C | 10.50399800  | 0.55498500  | -0.05063900 |
| C | 11.27662800  | 1.70984900  | 0.40425000  |
| C | 11.93389100  | 1.80998200  | 1.60741600  |
| C | 12.55096400  | 3.07536500  | 1.83563900  |
| C | 12.32223000  | 3.96887000  | 0.79492100  |
| C | 12.71618100  | 5.35660700  | 0.54914300  |
| C | 13.34327000  | 5.82827300  | -0.57680000 |
| C | 13.50130700  | 7.24957200  | -0.58577500 |
| C | 12.97427500  | 7.83960700  | 0.53394500  |
| S | -12.37339500 | 8.10587600  | 1.82791100  |
| S | -11.86543900 | 4.58925500  | -0.28401100 |
| S | -10.21304200 | 1.07155600  | 1.15614900  |
| S | -7.64644900  | -1.44992100 | -0.90321700 |
| S | -4.37856300  | -3.43571500 | 0.70042700  |
| S | -0.71369400  | -4.05639300 | -1.14712400 |
| S | 2.98992600   | -3.86292700 | 0.69708300  |
| S | 6.46165500   | -2.29073800 | -0.93898700 |
| S | 9.30358200   | -0.03527900 | 1.06740400  |
| S | 11.36054300  | 3.22564200  | -0.45436900 |
| S | 12.28109800  | 6.68778700  | 1.61089600  |
| H | -12.74361800 | 10.49800200 | 1.40571000  |
| H | -13.89666000 | 9.93710400  | -0.87730500 |
| H | -13.72495100 | 5.35492100  | 2.71076300  |
| H | -12.32085000 | 1.81458100  | -1.67650400 |
| H | -9.77564300  | -1.91950600 | 1.97207700  |
| H | -6.36285000  | -3.96518500 | -2.26632900 |
| H | -2.39515300  | -5.65450000 | 1.61682100  |
| H | 1.84695600   | -5.42396300 | -2.34906700 |
| H | 5.83293200   | -4.56695400 | 1.78952100  |
| H | 9.40033500   | -1.96302000 | -1.98170900 |
| H | 12.00605900  | 0.97914800  | 2.29491100  |
| H | 13.70040000  | 5.17832800  | -1.36580800 |
| H | 12.96450500  | 8.88919300  | 0.78648900  |
| C | 14.19005400  | 7.96955000  | -1.71123300 |
| C | 13.34010400  | 3.37335600  | 3.09168100  |
| C | 11.42081400  | 0.00914300  | -2.40161000 |
| C | 8.31609400   | -3.36032300 | 2.51586800  |
| C | 4.60719700   | -4.91944700 | -2.87874500 |



|                 |              |             |             |
|-----------------|--------------|-------------|-------------|
| C               | 0.36381000   | -6.09296200 | 2.20148200  |
| C               | -3.83223700  | -5.08578500 | -2.97299700 |
| C               | -7.70878200  | -3.84455200 | 2.38066800  |
| C               | -10.91415000 | -0.52297400 | -2.51593000 |
| C               | -14.18030000 | 7.21176600  | -1.69707700 |
| C               | -13.09312900 | 2.58906300  | 3.03285100  |
| Cl              | -15.25345100 | 8.40966200  | -2.52666200 |
| Cl              | -15.19068800 | 5.75246500  | -1.35727900 |
| Cl              | -12.87268900 | 6.75062300  | -2.88337300 |
| Cl              | -14.41322600 | 3.23916300  | 4.08510800  |
| Cl              | -11.63202300 | 2.34235600  | 4.09749200  |
| Cl              | -13.64830000 | 0.97828600  | 2.43115300  |
| Cl              | -12.40564700 | -0.10523500 | -3.44907200 |
| Cl              | -9.48561500  | -0.11499100 | -3.57433600 |
| Cl              | -10.94505400 | -2.30994700 | -2.24933500 |
| Cl              | -9.22223300  | -4.07506500 | 3.34253100  |
| Cl              | -6.43026800  | -3.23201900 | 3.52884300  |
| Cl              | -7.21435600  | -5.47573600 | 1.78097800  |
| Cl              | -5.23670200  | -5.55017700 | -4.01263800 |
| Cl              | -2.80401500  | -3.93303700 | -3.94317800 |
| Cl              | -2.88236100  | -6.59274400 | -2.66863800 |
| Cl              | -0.81946300  | -7.13704500 | 3.08360000  |
| Cl              | 1.00592600   | -4.87665600 | 3.40024900  |
| Cl              | 1.72261100   | -7.16364000 | 1.67993700  |
| Cl              | 3.78760600   | -6.11339200 | -3.96127200 |
| Cl              | 4.84816100   | -3.39248000 | -3.84665800 |
| Cl              | 6.22741400   | -5.60735100 | -2.46995500 |
| Cl              | 7.88797400   | -4.89437500 | 3.37300400  |
| Cl              | 8.08741100   | -1.99756000 | 3.70669400  |
| Cl              | 10.06847600  | -3.46911600 | 2.09002800  |
| Cl              | 11.47607100  | -1.44014400 | -3.48227100 |
| Cl              | 10.80884600  | 1.40424200  | -3.40447200 |
| Cl              | 13.12216300  | 0.35681500  | -1.90310400 |
| Cl              | 13.84065300  | 1.85695400  | 3.94398600  |
| Cl              | 12.31434100  | 4.33121700  | 4.25690900  |
| Cl              | 14.84752300  | 4.30370100  | 2.74762900  |
| Cl              | 15.91077100  | 7.40397900  | -1.85188200 |
| Cl              | 13.35471300  | 7.60826100  | -3.28383100 |
| Cl              | 14.20138200  | 9.75572400  | -1.47823500 |
| CF <sub>3</sub> |              |             |             |
| C               | 19.29375700  | 5.47547700  | -1.58385200 |
| C               | 19.26338000  | 5.20539600  | -0.24600100 |
| C               | 18.26147800  | 4.25302500  | 0.10481500  |
| C               | 17.52604900  | 3.80120900  | -0.97877500 |
| C               | 16.44276800  | 2.83514800  | -1.08695000 |
| C               | 16.23320400  | 1.95229200  | -2.12392200 |
| C               | 15.06638700  | 1.16032100  | -1.97733200 |
| C               | 14.35939600  | 1.43196000  | -0.81472100 |

|   |              |             |             |
|---|--------------|-------------|-------------|
| C | 13.15785000  | 0.84477300  | -0.24585500 |
| C | 12.88895500  | 0.67364000  | 1.09613800  |
| C | 11.61742800  | 0.10657500  | 1.35932800  |
| C | 10.88733900  | -0.16510100 | 0.21088400  |
| C | 9.58731000   | -0.77985000 | 0.00370900  |
| C | 9.22799900   | -1.58400000 | -1.05793300 |
| C | 7.87878600   | -2.01359900 | -1.02230900 |
| C | 7.17787600   | -1.53639000 | 0.07650200  |
| C | 5.81458000   | -1.75373000 | 0.52904900  |
| C | 5.39062600   | -1.83307500 | 1.83933500  |
| C | 3.99330900   | -2.01953300 | 1.98018800  |
| C | 3.32094200   | -2.08289200 | 0.76731600  |
| C | 1.92520000   | -2.31215700 | 0.43624500  |
| C | 1.45209300   | -2.98063400 | -0.67407400 |
| C | 0.03907300   | -3.02545600 | -0.75920100 |
| C | -0.59661100  | -2.38331100 | 0.29470400  |
| C | -1.99992800  | -2.22967200 | 0.63725100  |
| C | -2.52845900  | -2.19221400 | 1.91102900  |
| C | -3.93193500  | -2.00359900 | 1.94547500  |
| C | -4.50349300  | -1.89022600 | 0.68541300  |
| C | -5.88120900  | -1.74648400 | 0.24846900  |
| C | -6.42685200  | -2.26843900 | -0.90617500 |
| C | -7.79212000  | -1.94247100 | -1.09527600 |
| C | -8.31674600  | -1.15667000 | -0.07800100 |
| C | -9.65183000  | -0.63833600 | 0.16424100  |
| C | -10.23969900 | -0.44745600 | 1.39765700  |
| C | -11.54125600 | 0.10788700  | 1.33425900  |
| C | -11.97276300 | 0.35333300  | 0.03807300  |
| C | -13.22692300 | 0.85774200  | -0.49473800 |
| C | -13.81184100 | 0.48417100  | -1.68685100 |
| C | -15.01952500 | 1.16830600  | -1.97264900 |
| C | -15.37602100 | 2.08573200  | -0.99648300 |
| C | -16.53042000 | 2.96241200  | -0.85992200 |
| C | -17.19038400 | 3.26798300  | 0.30984700  |
| C | -18.24205800 | 4.20903500  | 0.12780000  |
| C | -18.37534600 | 4.61769900  | -1.17204500 |
| S | 18.08431700  | 4.58567300  | -2.44101000 |
| S | 15.14533400  | 2.70920500  | 0.07999800  |
| S | 11.78737800  | 0.32621800  | -1.20275800 |
| S | 8.20977700   | -0.51941100 | 1.05185000  |
| S | 4.44421000   | -1.87185600 | -0.55307200 |
| S | 0.58625200   | -1.69114400 | 1.37732100  |
| S | -3.26730200  | -1.98429000 | -0.54469600 |
| S | -7.07932900  | -0.79695100 | 1.10110900  |
| S | -10.72395000 | -0.08143200 | -1.10264900 |
| S | -14.17784100 | 2.11197800  | 0.27184700  |
| S | -17.21635100 | 3.86696400  | -2.20188000 |
| H | 19.95541000  | 6.14425500  | -2.11590900 |

|   |              |             |             |
|---|--------------|-------------|-------------|
| H | 19.93521400  | 5.64918000  | 0.47666100  |
| H | 16.91803700  | 1.84260100  | -2.95470900 |
| H | 13.60123100  | 0.90833900  | 1.87644500  |
| H | 9.92480500   | -1.89629800 | -1.82483800 |
| H | 6.06845500   | -1.80319000 | 2.68259400  |
| H | 2.09993000   | -3.46765300 | -1.39134900 |
| H | -1.93351800  | -2.34087700 | 2.80278000  |
| H | -5.87584100  | -2.90764700 | -1.58377400 |
| H | -9.76896200  | -0.73708700 | 2.32820300  |
| H | -13.41115700 | -0.29333000 | -2.32430800 |
| H | -16.94541400 | 2.81573900  | 1.26341600  |
| H | -19.09935800 | 5.31271600  | -1.57187900 |
| C | -19.12524600 | 4.67237300  | 1.24284900  |
| C | -15.82658100 | 0.86056600  | -3.20032500 |
| C | -12.35676700 | 0.33914300  | 2.57263500  |
| C | -8.56755200  | -2.46737700 | -2.26815800 |
| C | -4.69032600  | -1.99521500 | 3.24058000  |
| C | -0.65644500  | -3.75613300 | -1.87054100 |
| C | 3.35518200   | -2.18522100 | 3.32841500  |
| C | 7.32201000   | -2.93663600 | -2.06677800 |
| C | 11.17026000  | -0.20344300 | 2.75788800  |
| C | 18.07244800  | 3.79437900  | 1.52036800  |
| C | 14.70033200  | 0.10843100  | -2.98266500 |
| F | -18.40279300 | 5.19040700  | 2.26175600  |
| F | -19.99315800 | 5.62006700  | 0.83122400  |
| F | -19.84839100 | 3.65357100  | 1.76000000  |
| F | -15.79837600 | 1.88352900  | -4.09190500 |
| F | -17.12424900 | 0.62718200  | -2.91484800 |
| F | -15.34688500 | -0.22862900 | -3.83591400 |
| F | -12.56008000 | 1.66194100  | 2.80126200  |
| F | -13.57618700 | -0.23493700 | 2.49818800  |
| F | -11.73876300 | -0.15855600 | 3.66291000  |
| F | -7.83420100  | -3.34351700 | -2.98404300 |
| F | -8.93436200  | -1.47178500 | -3.11560700 |
| F | -9.70145500  | -3.09642400 | -1.89295600 |
| F | -5.21973700  | -0.77351100 | 3.50685700  |
| F | -5.71700000  | -2.87184500 | 3.23809500  |
| F | -3.88811900  | -2.31132900 | 4.27692600  |
| F | -1.31658900  | -2.90449900 | -2.69666100 |
| F | -1.56903200  | -4.63868000 | -1.41138300 |
| F | 0.22327100   | -4.43906600 | -2.63034000 |
| F | 2.54824300   | -1.13719100 | 3.63565800  |
| F | 2.59282500   | -3.29722700 | 3.40053500  |
| F | 4.28451400   | -2.26538100 | 4.30153100  |
| F | 6.40884000   | -2.31256400 | -2.85433300 |
| F | 6.70326700   | -4.00806300 | -1.52644300 |
| F | 8.29441700   | -3.39578600 | -2.87983200 |
| F | 10.13762800  | 0.58959100  | 3.14383400  |

|                 |              |             |             |
|-----------------|--------------|-------------|-------------|
| F               | 10.75071800  | -1.47996800 | 2.89048400  |
| F               | 12.16850400  | -0.00907300 | 3.64277200  |
| F               | 13.56944900  | 0.43230500  | -3.66162200 |
| F               | 14.47854900  | -1.09390700 | -2.40991800 |
| F               | 15.67633300  | -0.05148000 | -3.89948000 |
| F               | 16.91570000  | 4.26527000  | 2.05462600  |
| F               | 18.02728100  | 2.44851900  | 1.62306600  |
| F               | 19.07485300  | 4.22835200  | 2.31179600  |
| CH <sub>3</sub> |              |             |             |
| C               | 20.62487900  | 0.31582400  | -2.57607900 |
| C               | 20.32116200  | 1.46401800  | -1.90249200 |
| C               | 19.00807200  | 1.47854800  | -1.33642900 |
| C               | 18.31703100  | 0.30414700  | -1.59568200 |
| C               | 16.98752000  | -0.12421800 | -1.20581900 |
| C               | 16.51825500  | -1.41611000 | -1.08742000 |
| C               | 15.14873400  | -1.53457000 | -0.73066600 |
| C               | 14.53982900  | -0.29607200 | -0.56297300 |
| C               | 13.19532700  | 0.05876700  | -0.16780500 |
| C               | 12.74058500  | 1.28755300  | 0.27194500  |
| C               | 11.35346400  | 1.35595600  | 0.55943700  |
| C               | 10.70957100  | 0.14269800  | 0.34156400  |
| C               | 9.33415700   | -0.25366800 | 0.53606500  |
| C               | 8.82664200   | -1.53749300 | 0.60565100  |
| C               | 7.42103200   | -1.62837400 | 0.76842300  |
| C               | 6.81488400   | -0.37771500 | 0.83177100  |
| C               | 5.43515800   | 0.00288500  | 1.02399300  |
| C               | 4.93988100   | 1.25439400  | 1.34087800  |
| C               | 3.52825900   | 1.34424400  | 1.43707300  |
| C               | 2.90416200   | 0.12529700  | 1.19307500  |
| C               | 1.51077200   | -0.25335000 | 1.21862400  |
| C               | 0.98338700   | -1.52984700 | 1.27592800  |
| C               | -0.43195900  | -1.60566900 | 1.25002600  |
| C               | -1.02740500  | -0.35021100 | 1.17377600  |
| C               | -2.41597300  | 0.04450800  | 1.15426700  |
| C               | -2.93552700  | 1.31811600  | 1.29691700  |
| C               | -4.34704900  | 1.41404900  | 1.20873100  |
| C               | -4.94802400  | 0.17768800  | 0.99517500  |
| C               | -6.33711600  | -0.19884200 | 0.87786700  |
| C               | -6.87630800  | -1.46995500 | 0.94735700  |
| C               | -8.28015400  | -1.54703400 | 0.76518000  |
| C               | -8.85446200  | -0.29815300 | 0.55111200  |
| C               | -10.23023500 | 0.09607000  | 0.35663900  |
| C               | -10.76011200 | 1.37184000  | 0.41000300  |
| C               | -12.15104200 | 1.46512800  | 0.14874700  |
| C               | -12.72313400 | 0.22494800  | -0.11101700 |
| C               | -14.09062100 | -0.15592600 | -0.38503100 |
| C               | -14.64696800 | -1.41805200 | -0.30584700 |
| C               | -16.01803700 | -1.50166400 | -0.66608700 |

|   |              |             |             |
|---|--------------|-------------|-------------|
| C | -16.54128200 | -0.26930100 | -1.03165200 |
| C | -17.88170600 | 0.11954700  | -1.42645700 |
| C | -18.45670300 | 1.37068600  | -1.34230300 |
| C | -19.78372200 | 1.45167300  | -1.86419300 |
| C | -20.21071500 | 0.24265300  | -2.34721700 |
| S | 19.30002800  | -0.79640300 | -2.55671600 |
| S | 15.68292200  | 1.00235200  | -0.88499100 |
| S | 11.84749000  | -1.06299800 | -0.24843800 |
| S | 8.01502700   | 0.89838400  | 0.65994700  |
| S | 4.09584800   | -1.11429500 | 0.81855200  |
| S | 0.20000900   | 0.91054600  | 1.11298500  |
| S | -3.73077300  | -1.08837500 | 0.88288600  |
| S | -7.62011700  | 0.95672300  | 0.55604900  |
| S | -11.50395300 | -1.04198400 | -0.05261900 |
| S | -15.30580600 | 0.97828400  | -0.94995400 |
| S | -19.01131500 | -0.99901100 | -2.18246200 |
| H | 21.54411700  | 0.05711300  | -3.08253800 |
| H | 21.01469900  | 2.29100100  | -1.79405300 |
| H | 17.15795700  | -2.28028800 | -1.23121700 |
| H | 13.40198500  | 2.13596000  | 0.41101900  |
| H | 9.46142800   | -2.41599600 | 0.56314400  |
| H | 5.58655000   | 2.10534500  | 1.52613100  |
| H | 1.60764900   | -2.41309200 | 1.35773400  |
| H | -2.30959500  | 2.18426600  | 1.48304500  |
| H | -6.27172900  | -2.34751900 | 1.14977500  |
| H | -10.15993900 | 2.24089900  | 0.65751200  |
| H | -14.08442100 | -2.28058800 | 0.03528300  |
| H | -17.94418900 | 2.21604600  | -0.89540700 |
| H | -21.17267500 | 0.00350200  | -2.77990900 |
| C | -20.60750000 | 2.71118400  | -1.86438200 |
| H | -20.74868300 | 3.09444200  | -0.84734900 |
| H | -20.12086000 | 3.50423800  | -2.44363100 |
| H | -21.59617700 | 2.53943200  | -2.29762400 |
| C | -16.78142200 | -2.79929300 | -0.61204000 |
| H | -17.78102100 | -2.66746000 | -0.18787600 |
| H | -16.90761800 | -3.23925900 | -1.60854200 |
| H | -16.24674600 | -3.52960200 | 0.00143800  |
| C | -12.88428500 | 2.78032800  | 0.18707000  |
| H | -13.16451000 | 3.12077100  | -0.81678200 |
| H | -13.80472400 | 2.71788200  | 0.77591900  |
| H | -12.25256100 | 3.55447000  | 0.63061100  |
| C | -9.02139200  | -2.85647800 | 0.83096800  |
| H | -9.87782200  | -2.80775300 | 1.51115200  |
| H | -9.40406700  | -3.15909000 | -0.15079700 |
| H | -8.35773100  | -3.65051200 | 1.18299100  |
| C | -5.06830500  | 2.72761100  | 1.35919200  |
| H | -5.49336000  | 3.07092200  | 0.40868000  |
| H | -5.89202600  | 2.66179600  | 2.07713200  |

|     |             |             |             |
|-----|-------------|-------------|-------------|
| H   | -4.37910800 | 3.50095800  | 1.70822100  |
| C   | -1.15988900 | -2.92207500 | 1.32298000  |
| H   | -1.91838600 | -2.92721800 | 2.11260200  |
| H   | -1.66988200 | -3.15956300 | 0.38210900  |
| H   | -0.45659900 | -3.73310500 | 1.52881400  |
| C   | 2.83246800  | 2.63194200  | 1.79219700  |
| H   | 2.31176500  | 3.06530100  | 0.93009700  |
| H   | 2.08818100  | 2.49001700  | 2.58204900  |
| H   | 3.55773800  | 3.37132100  | 2.14184000  |
| C   | 6.71605300  | -2.95457300 | 0.88021800  |
| H   | 6.04667700  | -2.99056400 | 1.74568900  |
| H   | 6.11011200  | -3.17087100 | -0.00749900 |
| H   | 7.44401500  | -3.76326400 | 0.98476500  |
| C   | 10.70522700 | 2.61715900  | 1.06706000  |
| H   | 10.07628800 | 3.08880100  | 0.30275500  |
| H   | 10.06980500 | 2.42869700  | 1.93805700  |
| H   | 11.46742200 | 3.34486000  | 1.35779700  |
| C   | 18.49010500 | 2.64975500  | -0.54302800 |
| H   | 17.83290800 | 3.29135700  | -1.14262600 |
| H   | 17.91883700 | 2.32985900  | 0.33311500  |
| H   | 19.32109100 | 3.27026600  | -0.19596700 |
| C   | 14.48725900 | -2.87410000 | -0.53956300 |
| H   | 13.91988300 | -2.92099800 | 0.39526900  |
| H   | 13.79026500 | -3.10513600 | -1.35387800 |
| H   | 15.23831500 | -3.66804300 | -0.51723800 |
| CHO |             |             |             |
| C   | 17.55777000 | 6.59456500  | -0.51096500 |
| C   | 17.62308100 | 6.09324600  | 0.75267000  |
| C   | 16.85344900 | 4.89776900  | 0.92483600  |
| C   | 16.19510800 | 4.50758100  | -0.23822200 |
| C   | 15.31319800 | 3.38374200  | -0.51363900 |
| C   | 15.23359000 | 2.64175900  | -1.66603600 |
| C   | 14.23163500 | 1.62860400  | -1.63977100 |
| C   | 13.51651300 | 1.60331100  | -0.44431600 |
| C   | 12.42967500 | 0.75286300  | 0.01012000  |
| C   | 12.20021800 | 0.29498700  | 1.28494500  |
| C   | 11.01920800 | -0.49006200 | 1.41855800  |
| C   | 10.31761200 | -0.62384800 | 0.22198200  |
| C   | 9.08654800  | -1.32378200 | -0.10034200 |
| C   | 8.77174200  | -1.96704900 | -1.27312400 |
| C   | 7.46259000  | -2.52707900 | -1.29736200 |
| C   | 6.75073300  | -2.29458400 | -0.12217100 |
| C   | 5.41023600  | -2.67778400 | 0.28460200  |
| C   | 4.98596000  | -3.02454700 | 1.54461200  |
| C   | 3.59428400  | -3.31318100 | 1.63198900  |
| C   | 2.93209400  | -3.16831700 | 0.41420000  |
| C   | 1.53984000  | -3.35542500 | 0.04654000  |
| C   | 1.04491200  | -3.82382200 | -1.14682100 |

|   |              |             |             |
|---|--------------|-------------|-------------|
| C | -0.37700600  | -3.85660300 | -1.21526900 |
| C | -0.98745300  | -3.38734000 | -0.05360200 |
| C | -2.38577300  | -3.24753900 | 0.31196700  |
| C | -2.94461400  | -3.41445300 | 1.55619100  |
| C | -4.34630600  | -3.16873300 | 1.60313900  |
| C | -4.87251200  | -2.78843300 | 0.36984300  |
| C | -6.22420100  | -2.44859300 | -0.03749100 |
| C | -6.82147300  | -2.70219800 | -1.24885100 |
| C | -8.15291900  | -2.20907300 | -1.35648100 |
| C | -8.58149200  | -1.54733900 | -0.20724000 |
| C | -9.83975300  | -0.90056400 | 0.11994900  |
| C | -10.45831700 | -0.84758300 | 1.34583200  |
| C | -11.67098800 | -0.10123000 | 1.35469700  |
| C | -11.98124000 | 0.44524000  | 0.11094800  |
| C | -13.09770400 | 1.26225000  | -0.33143600 |
| C | -13.71345800 | 1.24216700  | -1.55967100 |
| C | -14.76036500 | 2.19759500  | -1.70080100 |
| C | -14.93917100 | 2.97935100  | -0.56254200 |
| C | -15.87286200 | 4.05678100  | -0.27376100 |
| C | -16.50308600 | 4.32489800  | 0.91759100  |
| C | -17.31368800 | 5.49931800  | 0.87807900  |
| C | -17.28354600 | 6.12144300  | -0.35002100 |
| S | 16.53253000  | 5.63365700  | -1.53233900 |
| S | 14.08330100  | 2.85827800  | 0.62939200  |
| S | 11.12476400  | 0.24911400  | -1.05738200 |
| S | 7.71148200   | -1.35911400 | 0.99687400  |
| S | 4.04714000   | -2.65235000 | -0.82764500 |
| S | 0.21706900   | -2.88722900 | 1.10815700  |
| S | -3.61029300  | -2.71930800 | -0.83578500 |
| S | -7.31222500  | -1.52599000 | 0.99250200  |
| S | -10.74705800 | 0.04157000  | -1.05712700 |
| S | -13.78881800 | 2.53192800  | 0.67166400  |
| S | -16.26794400 | 5.29637800  | -1.46653300 |
| H | 18.04588700  | 7.47128000  | -0.91369900 |
| H | 18.20375300  | 6.52095600  | 1.56005300  |
| H | 15.89386500  | 2.76830200  | -2.51517600 |
| H | 12.86841600  | 0.46347700  | 2.12063600  |
| H | 9.45853200   | -2.09196900 | -2.10144300 |
| H | 5.64131200   | -3.12356300 | 2.40141000  |
| H | 1.66092400   | -4.18716600 | -1.96044600 |
| H | -2.39742400  | -3.74968000 | 2.42894600  |
| H | -6.35906700  | -3.26717600 | -2.04915500 |
| H | -10.10026300 | -1.35996600 | 2.23057500  |
| H | -13.47406100 | 0.53978700  | -2.34889800 |
| H | -16.42412100 | 3.70230100  | 1.80052800  |
| H | -17.80971800 | 7.01806400  | -0.65085900 |
| C | 14.09419800  | 0.67186700  | -2.75477400 |
| O | 14.73381500  | 0.76528000  | -3.78718700 |

|    |              |             |             |
|----|--------------|-------------|-------------|
| H  | 13.38420200  | -0.16315300 | -2.60101800 |
| C  | 16.87423900  | 4.15536200  | 2.19767200  |
| O  | 17.44831000  | 4.56093700  | 3.19324000  |
| H  | 16.34943000  | 3.18034200  | 2.20494900  |
| C  | 10.69307100  | -1.15053100 | 2.69811800  |
| O  | 11.33859200  | -0.97045500 | 3.71482900  |
| H  | 9.83155300   | -1.84500000 | 2.68768100  |
| C  | 7.01381300   | -3.34801100 | -2.43979400 |
| O  | 7.68042200   | -3.49079200 | -3.44870300 |
| H  | 6.03558900   | -3.85313200 | -2.32839700 |
| C  | 3.00683100   | -3.81202300 | 2.89184900  |
| O  | 3.64320500   | -3.89077100 | 3.92692300  |
| H  | 1.94972700   | -4.13572900 | 2.84836200  |
| C  | -1.06185900  | -4.44059000 | -2.38620100 |
| O  | -0.46319800  | -4.81081500 | -3.37969300 |
| H  | -2.16065200  | -4.54707700 | -2.31155000 |
| C  | -5.11289800  | -3.41614300 | 2.84111400  |
| O  | -4.58082600  | -3.72563200 | 3.89161800  |
| H  | -6.21301800  | -3.32589100 | 2.76573500  |
| C  | -8.97026800  | -2.50050700 | -2.55155600 |
| O  | -8.52132900  | -3.06574200 | -3.53206500 |
| H  | -10.03270200 | -2.19480700 | -2.50772200 |
| C  | -12.51286800 | -0.04584100 | 2.56691600  |
| O  | -12.16565000 | -0.52799400 | 3.62962000  |
| H  | -13.49907300 | 0.44408300  | 2.45946400  |
| C  | -15.59754500 | 2.23033000  | -2.91708500 |
| O  | -15.36846400 | 1.53726500  | -3.89156000 |
| H  | -16.46941000 | 2.91122300  | -2.89413800 |
| C  | -18.10536000 | 5.98810200  | 2.02153100  |
| O  | -18.13432900 | 5.43592500  | 3.10427100  |
| H  | -18.68776800 | 6.91396400  | 1.82848100  |
| Cl |              |             |             |
| C  | 21.33830400  | -0.05543100 | 0.18890300  |
| C  | 20.87398800  | -1.33701200 | 0.18816700  |
| C  | 19.45082700  | -1.39113000 | 0.16761900  |
| C  | 18.81993900  | -0.16057700 | 0.15293600  |
| C  | 17.42311900  | 0.21672800  | 0.13219800  |
| C  | 16.92196600  | 1.50190700  | 0.13109000  |
| C  | 15.51031000  | 1.55403500  | 0.10613900  |
| C  | 14.88028900  | 0.32195800  | 0.08790000  |
| C  | 13.48728700  | -0.05542500 | 0.06307900  |
| C  | 12.98541800  | -1.34207900 | 0.05591700  |
| C  | 11.57479200  | -1.39376800 | 0.02905600  |
| C  | 10.94372300  | -0.16136200 | 0.01496100  |
| C  | 9.55128100   | 0.21550300  | -0.01053300 |
| C  | 9.04985100   | 1.50266500  | -0.01957700 |
| C  | 7.63954000   | 1.55512300  | -0.04486000 |
| C  | 7.00746200   | 0.32302700  | -0.05612100 |



|   |              |             |             |
|---|--------------|-------------|-------------|
| C | 5.61476700   | -0.05238600 | -0.07996200 |
| C | 5.11169600   | -1.33894900 | -0.09247200 |
| C | 3.70124500   | -1.38959100 | -0.11310000 |
| C | 3.07055400   | -0.15671600 | -0.11754900 |
| C | 1.67835900   | 0.22073700  | -0.13607100 |
| C | 1.17733700   | 1.50807100  | -0.15046700 |
| C | -0.23313100  | 1.56105200  | -0.16235600 |
| C | -0.86597700  | 0.32930600  | -0.15840300 |
| C | -2.25891400  | -0.04581100 | -0.16807500 |
| C | -2.76218300  | -1.33215700 | -0.18515600 |
| C | -4.17285100  | -1.38286000 | -0.18381500 |
| C | -4.80365900  | -0.15021100 | -0.16721000 |
| C | -6.19608800  | 0.22724100  | -0.16345100 |
| C | -6.69769600  | 1.51408500  | -0.18273100 |
| C | -8.10831900  | 1.56693900  | -0.16267400 |
| C | -8.74057100  | 0.33551800  | -0.12984100 |
| C | -10.13350200 | -0.04046300 | -0.10832300 |
| C | -10.63674100 | -1.32620600 | -0.13611300 |
| C | -12.04709800 | -1.37814500 | -0.08886600 |
| C | -12.67697300 | -0.14703500 | -0.02766100 |
| C | -14.06990300 | 0.23004900  | 0.02012800  |
| C | -14.57437200 | 1.51446600  | -0.02518500 |
| C | -15.98412200 | 1.56684300  | 0.06088700  |
| C | -16.60849700 | 0.33808800  | 0.16751200  |
| C | -18.00320500 | -0.04309300 | 0.24724100  |
| C | -18.51877400 | -1.30933100 | 0.05269400  |
| C | -19.92233900 | -1.36751300 | 0.25434200  |
| C | -20.48675200 | -0.17098700 | 0.59646700  |
| S | 20.04965100  | 1.10113100  | 0.16405000  |
| S | 16.10468100  | -0.94365300 | 0.10142200  |
| S | 12.16726500  | 1.10500300  | 0.03566800  |
| S | 8.23025300   | -0.94422500 | -0.03411700 |
| S | 4.29491100   | 1.10897100  | -0.09414800 |
| S | 0.35640600   | -0.93839400 | -0.13711100 |
| S | -3.57905700  | 1.11536600  | -0.14931100 |
| S | -7.51766800  | -0.93163900 | -0.11782300 |
| S | -11.45287200 | 1.11850200  | -0.01834700 |
| S | -15.38504700 | -0.92477600 | 0.18525900  |
| S | -19.29033400 | 1.07665200  | 0.68012000  |
| H | 22.36422000  | 0.28427100  | 0.20220900  |
| H | 21.49973600  | -2.21994300 | 0.20157900  |
| H | 17.53558400  | 2.39368000  | 0.14829100  |
| H | 13.59898800  | -2.23389400 | 0.07006700  |
| H | 9.66399500   | 2.39410600  | -0.00817100 |
| H | 5.72484600   | -2.23113400 | -0.08710700 |
| H | 1.79199700   | 2.39922900  | -0.15300200 |
| H | -2.14903800  | -2.22425700 | -0.19943600 |
| H | -6.08356500  | 2.40513800  | -0.21255300 |

|    |              |             |             |
|----|--------------|-------------|-------------|
| H  | -10.02441300 | -2.21723600 | -0.19248300 |
| H  | -13.96485400 | 2.40351200  | -0.12638900 |
| H  | -17.92556700 | -2.16735600 | -0.23712800 |
| H  | -21.52761400 | 0.04772800  | 0.78338700  |
| Cl | 18.62506300  | -2.92709700 | 0.16305800  |
| Cl | 14.68547700  | 3.09089300  | 0.10147000  |
| Cl | 10.74910000  | -2.93010000 | 0.01669700  |
| Cl | 6.81493600   | 3.09211800  | -0.05959000 |
| Cl | 2.87459400   | -2.92549700 | -0.13165300 |
| Cl | -1.05721700  | 3.09841200  | -0.18234700 |
| Cl | -4.99943100  | -2.91895600 | -0.20569600 |
| Cl | -8.93305800  | 3.10421200  | -0.18553200 |
| Cl | -12.87382400 | -2.91450800 | -0.11962600 |
| Cl | -16.81677500 | 3.10013800  | 0.00503600  |
| Cl | -20.83460900 | -2.84440800 | 0.06172500  |
| CN |              |             |             |
| C  | 21.25884700  | -0.07988700 | 0.08888300  |
| C  | 20.78013600  | -1.35431400 | 0.08286300  |
| C  | 19.34780400  | -1.40533600 | 0.07350200  |
| C  | 18.74694100  | -0.14689900 | 0.07256300  |
| C  | 17.34970900  | 0.22981500  | 0.06468100  |
| C  | 16.83695800  | 1.50840600  | 0.06697400  |
| C  | 15.41622200  | 1.55773800  | 0.05720500  |
| C  | 14.81705200  | 0.29647300  | 0.04731400  |
| C  | 13.42345200  | -0.08063500 | 0.03637700  |
| C  | 12.91163500  | -1.36143000 | 0.03135700  |
| C  | 11.49214800  | -1.41091000 | 0.01998100  |
| C  | 10.89128100  | -0.14933400 | 0.01626100  |
| C  | 9.49777200   | 0.22603400  | 0.00595900  |
| C  | 8.98552800   | 1.50699300  | 0.00549200  |
| C  | 7.56643900   | 1.55643300  | -0.00624900 |
| C  | 6.96575900   | 0.29444100  | -0.01494700 |
| C  | 5.57230700   | -0.08049900 | -0.02739800 |
| C  | 5.05951400   | -1.36128200 | -0.03534000 |
| C  | 3.64047000   | -1.41003500 | -0.04707200 |
| C  | 3.04030600   | -0.14765000 | -0.04825300 |
| C  | 1.64712600   | 0.22809500  | -0.05869000 |
| C  | 1.13539500   | 1.50930900  | -0.06450300 |
| C  | -0.28356700  | 1.55938400  | -0.07391200 |
| C  | -0.88487200  | 0.29745000  | -0.07562300 |
| C  | -2.27839300  | -0.07683000 | -0.08514000 |
| C  | -2.79164000  | -1.35733100 | -0.10040200 |
| C  | -4.21071100  | -1.40576900 | -0.10521400 |
| C  | -4.81058400  | -0.14315500 | -0.09402700 |
| C  | -6.20358000  | 0.23300400  | -0.09713700 |
| C  | -6.71492600  | 1.51413200  | -0.11684500 |
| C  | -8.13395100  | 1.56494500  | -0.11149600 |
| C  | -8.73573600  | 0.30337400  | -0.08838600 |

|   |              |             |             |
|---|--------------|-------------|-------------|
| C | -10.12937200 | -0.07049200 | -0.08203400 |
| C | -10.64349900 | -1.34996400 | -0.11980600 |
| C | -12.06266800 | -1.39835200 | -0.09618400 |
| C | -12.66116300 | -0.13644700 | -0.04140000 |
| C | -14.05414900 | 0.24083000  | -0.01498900 |
| C | -14.56661200 | 1.51927800  | -0.08314000 |
| C | -15.98546400 | 1.57147200  | -0.02370200 |
| C | -16.58290700 | 0.31439700  | 0.08939200  |
| C | -17.97845700 | -0.06210100 | 0.15775100  |
| C | -18.49680800 | -1.33580000 | 0.04116100  |
| C | -19.91518300 | -1.37976000 | 0.18050100  |
| C | -20.46354500 | -0.13304200 | 0.40118000  |
| S | 19.98224500  | 1.09246700  | 0.08318600  |
| S | 16.04403700  | -0.94779000 | 0.04988000  |
| S | 12.11609500  | 1.09652500  | 0.02678200  |
| S | 8.19041900   | -0.95137400 | -0.00840300 |
| S | 4.26541400   | 1.09757100  | -0.03419400 |
| S | 0.33915000   | -0.94887400 | -0.06416600 |
| S | -3.58509400  | 1.10161700  | -0.07464900 |
| S | -7.51214400  | -0.94320200 | -0.06782800 |
| S | -11.43512600 | 1.10697200  | -0.00857300 |
| S | -15.35950600 | -0.92868900 | 0.13857800  |
| S | -19.27054600 | 1.10071600  | 0.44048400  |
| H | 22.28816500  | 0.24945300  | 0.09627600  |
| H | 21.40116000  | -2.24099500 | 0.08486700  |
| H | 17.44630500  | 2.40381300  | 0.07562700  |
| H | 13.52157500  | -2.25672800 | 0.03589600  |
| H | 9.59526700   | 2.40241300  | 0.01347400  |
| H | 5.66884200   | -2.25703900 | -0.03301800 |
| H | 1.74547800   | 2.40456000  | -0.06270200 |
| H | -2.18260300  | -2.25326400 | -0.10947200 |
| H | -6.10457500  | 2.40898200  | -0.13773700 |
| H | -10.03533900 | -2.24519700 | -0.16938300 |
| H | -13.95874400 | 2.41028800  | -0.18498200 |
| H | -17.89735300 | -2.21775700 | -0.14964800 |
| H | -21.50816700 | 0.11130300  | 0.53226500  |
| C | -20.68927800 | -2.57630300 | 0.09362200  |
| N | -21.31733500 | -3.55268800 | 0.02266300  |
| C | -16.69614400 | 2.80473100  | -0.09306700 |
| N | -17.25814600 | 3.82294000  | -0.14600600 |
| C | -12.77442700 | -2.63187000 | -0.13575400 |
| N | -13.34122300 | -3.64853200 | -0.16547100 |
| C | -8.84280000  | 2.80048400  | -0.13295600 |
| N | -9.40833500  | 3.81819700  | -0.14894700 |
| C | -4.92191900  | -2.64000500 | -0.12229000 |
| N | -5.49040600  | -3.65611000 | -0.13538900 |
| C | -0.99340500  | 2.79450400  | -0.08168200 |
| N | -1.56105100  | 3.81115000  | -0.08754700 |

|      |              |             |             |
|------|--------------|-------------|-------------|
| C    | 2.92916600   | -2.64430200 | -0.05678100 |
| N    | 2.35972400   | -3.65992900 | -0.06450100 |
| C    | 6.85593900   | 2.79119700  | -0.00849600 |
| N    | 6.28746800   | 3.80740900  | -0.01021900 |
| C    | 10.78130100  | -2.64545100 | 0.01355600  |
| N    | 10.21179700  | -3.66107900 | 0.00830100  |
| C    | 14.70746800  | 2.79329600  | 0.05810400  |
| N    | 14.14395800  | 3.81240100  | 0.05886400  |
| C    | 18.63736500  | -2.63905100 | 0.06616200  |
| N    | 18.07229700  | -3.65758200 | 0.06016900  |
| COOH |              |             |             |
| C    | 13.65519200  | 8.83195200  | -0.46723900 |
| C    | 14.10898500  | 8.40098600  | 0.74180300  |
| C    | 14.00789100  | 6.98273700  | 0.91352700  |
| C    | 13.45657800  | 6.34099600  | -0.19012400 |
| C    | 13.13314600  | 4.94916200  | -0.49085600 |
| C    | 13.37213200  | 4.29129400  | -1.67180900 |
| C    | 12.85425100  | 2.96401600  | -1.72066400 |
| C    | 12.18009800  | 2.60539000  | -0.55631300 |
| C    | 11.48379000  | 1.39934100  | -0.12142000 |
| C    | 11.54327400  | 0.83281600  | 1.12884600  |
| C    | 10.67208300  | -0.27922200 | 1.31294100  |
| C    | 9.90617400   | -0.55621600 | 0.18324600  |
| C    | 8.88685800   | -1.55239100 | -0.12680800 |
| C    | 8.75712700   | -2.24419300 | -1.30680300 |
| C    | 7.60092800   | -3.07333600 | -1.37861100 |
| C    | 6.81042400   | -2.99575800 | -0.23442200 |
| C    | 5.55858700   | -3.62170500 | 0.17577900  |
| C    | 5.26545700   | -4.10346800 | 1.42895300  |
| C    | 3.92531300   | -4.55946000 | 1.58576100  |
| C    | 3.16359700   | -4.40014400 | 0.43048200  |
| C    | 1.77673200   | -4.69071700 | 0.08527000  |
| C    | 1.32856100   | -5.21763000 | -1.10212400 |
| C    | -0.08939100  | -5.29035000 | -1.21572200 |
| C    | -0.74605300  | -4.78279400 | -0.09696700 |
| C    | -2.14908400  | -4.62513200 | 0.26865900  |
| C    | -2.69401100  | -4.85273700 | 1.50961800  |
| C    | -4.07120400  | -4.50683200 | 1.62013400  |
| C    | -4.58950500  | -3.97689000 | 0.44094700  |
| C    | -5.90213800  | -3.47617300 | 0.04889200  |
| C    | -6.53405000  | -3.70467300 | -1.14955300 |
| C    | -7.76191300  | -3.00074300 | -1.31075800 |
| C    | -8.06630500  | -2.19132100 | -0.21860400 |
| C    | -9.16857400  | -1.29024500 | 0.09751400  |
| C    | -9.77974900  | -1.15423700 | 1.32087200  |
| C    | -10.75461900 | -0.11753900 | 1.37980100  |
| C    | -10.87685600 | 0.57580200  | 0.17789400  |
| C    | -11.70332300 | 1.69248000  | -0.26695300 |

|   |              |             |             |
|---|--------------|-------------|-------------|
| C | -12.32356800 | 1.80618900  | -1.48796600 |
| C | -12.97848500 | 3.05333600  | -1.70034800 |
| C | -12.83371100 | 3.92770400  | -0.62702600 |
| C | -13.29595000 | 5.28767100  | -0.36409200 |
| C | -13.83651700 | 5.75255700  | 0.81112500  |
| C | -14.06842900 | 7.15955600  | 0.81109800  |
| C | -13.68225300 | 7.75810200  | -0.36600200 |
| S | 13.06388200  | 7.51601900  | -1.42625900 |
| S | 12.19793600  | 3.92895700  | 0.58035700  |
| S | 10.28362200  | 0.57337400  | -1.09189300 |
| S | 7.51996500   | -1.88947400 | 0.91334200  |
| S | 4.13003400   | -3.68442700 | -0.83395500 |
| S | 0.41433300   | -4.22209700 | 1.07940000  |
| S | -3.35251900  | -3.91817600 | -0.78814500 |
| S | -6.81670500  | -2.31995500 | 0.99264000  |
| S | -9.77382000  | -0.07477100 | -1.00727300 |
| S | -11.88617100 | 3.18264700  | 0.63338800  |
| S | -13.04796400 | 6.62031100  | -1.48630600 |
| H | 13.63297400  | 9.84059000  | -0.85544800 |
| H | 14.52715200  | 9.03947000  | 1.50906200  |
| H | 13.93514400  | 4.71342300  | -2.49450100 |
| H | 12.21530300  | 1.16450800  | 1.90997800  |
| H | 9.48042800   | -2.20616300 | -2.11132200 |
| H | 5.98756500   | -4.17433200 | 2.23232300  |
| H | 1.98100900   | -5.58707400 | -1.88297000 |
| H | -2.15030900  | -5.29218500 | 2.33617500  |
| H | -6.16702200  | -4.38753900 | -1.90511000 |
| H | -9.57996400  | -1.79487800 | 2.17031200  |
| H | -12.35730200 | 1.01339800  | -2.22432200 |
| H | -14.08306100 | 5.11959900  | 1.65423000  |
| H | -13.75862900 | 8.80435200  | -0.62526900 |
| C | -14.66616700 | 7.85436700  | 1.96728600  |
| O | -15.00235600 | 7.31039400  | 3.00001700  |
| O | -14.80609700 | 9.18840000  | 1.76259200  |
| H | -15.20173400 | 9.54250100  | 2.57621200  |
| C | -13.76278200 | 3.22491900  | -2.94379600 |
| O | -13.77954200 | 2.40897300  | -3.84481400 |
| O | -14.48656900 | 4.36638100  | -2.99144400 |
| H | -14.95019900 | 4.35283900  | -3.84568000 |
| C | -11.53491200 | 0.03072700  | 2.62867300  |
| O | -11.30992200 | -0.60452600 | 3.64026900  |
| O | -12.54476900 | 0.92705400  | 2.54987900  |
| H | -12.97069600 | 0.92869800  | 3.42371000  |
| C | -8.56106400  | -3.27025400 | -2.52699800 |
| O | -8.17055700  | -3.96144400 | -3.44747200 |
| O | -9.78577600  | -2.69610100 | -2.52571100 |
| H | -10.20055200 | -2.94688700 | -3.36835800 |
| C | -4.76514600  | -4.81618400 | 2.89030500  |

|   |              |             |             |
|---|--------------|-------------|-------------|
| O | -4.19832200  | -5.23751300 | 3.87957500  |
| O | -6.10141100  | -4.60943900 | 2.85783600  |
| H | -6.43098800  | -4.84586700 | 3.74128700  |
| C | -0.65687300  | -5.94047300 | -2.41800700 |
| O | 0.01367900   | -6.30601400 | -3.36361600 |
| O | -1.99724600  | -6.11677600 | -2.37352300 |
| H | -2.23938200  | -6.54645100 | -3.21122900 |
| C | 3.55345300   | -5.19044100 | 2.87187200  |
| O | 4.29059100   | -5.23151700 | 3.83748800  |
| O | 2.31924900   | -5.74385600 | 2.88306200  |
| H | 2.20086100   | -6.11749300 | 3.77267100  |
| C | 7.43751400   | -3.93401800 | -2.57132400 |
| O | 8.16781900   | -3.88301900 | -3.54166200 |
| O | 6.40929700   | -4.80911200 | -2.48826500 |
| H | 6.41155600   | -5.30569500 | -3.32396600 |
| C | 10.74728300  | -1.01588800 | 2.59431000  |
| O | 11.41672700  | -0.65086900 | 3.54095400  |
| O | 10.01890500  | -2.15553800 | 2.62356900  |
| H | 10.15266700  | -2.53629600 | 3.50794600  |
| C | 13.15388200  | 2.14388700  | -2.91525000 |
| O | 13.70624600  | 2.57725800  | -3.90749900 |
| O | 12.77800200  | 0.84826800  | -2.80842400 |
| H | 13.02782900  | 0.42757100  | -3.64836400 |
| C | 14.54443800  | 6.39044100  | 2.15908800  |
| O | 14.94745100  | 7.04919500  | 3.09796900  |
| O | 14.57517200  | 5.03738300  | 2.16449100  |
| H | 14.94457300  | 4.78315300  | 3.02691300  |
| F |              |             |             |
| C | -21.11797300 | 0.13226800  | -0.00000200 |
| C | -20.59896200 | 1.39603500  | -0.00000200 |
| C | -19.18204500 | 1.36657200  | -0.00000100 |
| C | -18.60429700 | 0.11571700  | -0.00000100 |
| C | -17.20803400 | -0.24205600 | 0.00000000  |
| C | -16.65639200 | -1.50733300 | 0.00000100  |
| C | -15.24899900 | -1.47102900 | 0.00000100  |
| C | -14.67246300 | -0.21836700 | 0.00000000  |
| C | -13.28077800 | 0.14070600  | 0.00000000  |
| C | -12.73058600 | 1.40860900  | 0.00000000  |
| C | -11.32426600 | 1.37479000  | 0.00000000  |
| C | -10.74395300 | 0.12303400  | 0.00000000  |
| C | -9.35233700  | -0.23266400 | 0.00000000  |
| C | -8.79995400  | -1.50007700 | 0.00000100  |
| C | -7.39405800  | -1.46422200 | 0.00000100  |
| C | -6.81507500  | -0.21165300 | 0.00000000  |
| C | -5.42396700  | 0.14499300  | 0.00000000  |
| C | -4.87184500  | 1.41264900  | 0.00000000  |
| C | -3.46593800  | 1.37724000  | 0.00000000  |
| C | -2.88642000  | 0.12490900  | 0.00000000  |

|   |              |             |             |
|---|--------------|-------------|-------------|
| C | -1.49542000  | -0.23185800 | 0.00000000  |
| C | -0.94380100  | -1.49972700 | 0.00000100  |
| C | 0.46210600   | -1.46501700 | 0.00000100  |
| C | 1.04237200   | -0.21306400 | 0.00000100  |
| C | 2.43367000   | 0.14267600  | 0.00000100  |
| C | 2.98674900   | 1.40982700  | 0.00000100  |
| C | 4.39275700   | 1.37362900  | 0.00000100  |
| C | 4.97169200   | 0.12115100  | 0.00000100  |
| C | 6.36255400   | -0.23678800 | 0.00000100  |
| C | 6.91348500   | -1.50468300 | 0.00000200  |
| C | 8.31972900   | -1.47103900 | 0.00000200  |
| C | 8.90091600   | -0.21978600 | 0.00000100  |
| C | 10.29270600  | 0.13591000  | 0.00000000  |
| C | 10.84628700  | 1.40222700  | 0.00000000  |
| C | 12.25298300  | 1.36574000  | -0.00000100 |
| C | 12.83138000  | 0.11370900  | 0.00000000  |
| C | 14.22305700  | -0.24641600 | -0.00000100 |
| C | 14.77275800  | -1.51335700 | -0.00000100 |
| C | 16.18102100  | -1.48045200 | -0.00000100 |
| C | 16.76177300  | -0.23144700 | -0.00000100 |
| C | 18.15842100  | 0.12736600  | 0.00000000  |
| C | 18.70964800  | 1.39192300  | 0.00000300  |
| C | 20.12655200  | 1.35589800  | 0.00000200  |
| C | 20.67332500  | 0.10607800  | -0.00000300 |
| S | -19.88352600 | -1.08803400 | -0.00000100 |
| S | -15.94909900 | 0.98897600  | -0.00000100 |
| S | -12.01757900 | -1.08796600 | 0.00000100  |
| S | -8.09045700  | 0.99787300  | 0.00000000  |
| S | -4.16142600  | -1.08509600 | 0.00000100  |
| S | -0.23215000  | 0.99761500  | 0.00000000  |
| S | 3.69582200   | -1.08808900 | 0.00000100  |
| S | 7.62712000   | 0.99163800  | 0.00000000  |
| S | 11.55516900  | -1.09483100 | 0.00000000  |
| S | 15.48971200  | 0.97976000  | 0.00000000  |
| S | 19.42416800  | -1.09800300 | -0.00000500 |
| H | -22.15764200 | -0.16214900 | -0.00000200 |
| H | -21.17826200 | 2.31021100  | -0.00000200 |
| H | -17.22362900 | -2.42950300 | 0.00000200  |
| H | -13.29980900 | 2.32950300  | -0.00000100 |
| H | -9.36799800  | -2.42167100 | 0.00000100  |
| H | -5.44025000  | 2.33401900  | -0.00000100 |
| H | -1.51264600  | -2.42082500 | 0.00000100  |
| H | 2.41892200   | 2.33156400  | 0.00000000  |
| H | 6.34412700   | -2.42549500 | 0.00000300  |
| H | 10.27898700  | 2.32434400  | -0.00000100 |
| H | 14.20333600  | -2.43422400 | -0.00000200 |
| H | 18.13952900  | 2.31261100  | 0.00000600  |
| H | 21.71778700  | -0.16569200 | -0.00000400 |

|          |              |              |             |
|----------|--------------|--------------|-------------|
| F        | 20.85721300  | 2.48385900   | 0.00000500  |
| F        | 12.99049100  | 2.49187600   | -0.00000100 |
| F        | 16.91406400  | -2.61006700  | -0.00000200 |
| F        | 5.13089000   | 2.49883700   | 0.00000100  |
| F        | 9.05551700   | -2.59800300  | 0.00000300  |
| F        | 1.19914700   | -2.59080300  | 0.00000100  |
| F        | -6.65602200  | -2.58913100  | 0.00000100  |
| F        | -2.72819700  | 2.50244100   | -0.00000100 |
| F        | -14.51108600 | -2.59584300  | 0.00000200  |
| F        | -10.58783600 | 2.50062100   | -0.00000100 |
| F        | -18.44604400 | 2.49289200   | -0.00000200 |
| H-planar |              |              |             |
| C        | 0.00000000   | 20.86104000  | 0.14696800  |
| C        | 0.00000000   | 20.33662700  | 1.40990500  |
| C        | 0.00000000   | 18.91410700  | 1.41888100  |
| C        | 0.00000000   | 18.35297400  | 0.15832900  |
| C        | 0.00000000   | 16.95703300  | -0.21833100 |
| C        | 0.00000000   | 16.39506500  | -1.47900500 |
| C        | 0.00000000   | 14.98097500  | -1.47602100 |
| C        | 0.00000000   | 14.42484700  | -0.21168200 |
| C        | 0.00000000   | 13.03511900  | 0.17088100  |
| C        | 0.00000000   | 12.47816800  | 1.43562600  |
| C        | 0.00000000   | 11.06525500  | 1.43893700  |
| C        | 0.00000000   | 10.50236100  | 0.17673300  |
| C        | 0.00000000   | 9.11160200   | -0.19912500 |
| C        | 0.00000000   | 8.54976000   | -1.46208500 |
| C        | 0.00000000   | 7.13725800   | -1.46017200 |
| C        | 0.00000000   | 6.57879000   | -0.19574400 |
| C        | 0.00000000   | 5.18924700   | 0.18385000  |
| C        | 0.00000000   | 4.62997700   | 1.44803200  |
| C        | 0.00000000   | 3.21747800   | 1.44901200  |
| C        | 0.00000000   | 2.65642800   | 0.18564600  |
| C        | 0.00000000   | 1.26639700   | -0.19198800 |
| C        | 0.00000000   | 0.70619800   | -1.45576700 |
| C        | 0.00000000   | -0.70619800  | -1.45576700 |
| C        | 0.00000000   | -1.26639700  | -0.19198800 |
| C        | 0.00000000   | -2.65642800  | 0.18564600  |
| C        | 0.00000000   | -3.21747800  | 1.44901200  |
| C        | 0.00000000   | -4.62997700  | 1.44803200  |
| C        | 0.00000000   | -5.18924700  | 0.18385000  |
| C        | 0.00000000   | -6.57879000  | -0.19574400 |
| C        | 0.00000000   | -7.13725800  | -1.46017200 |
| C        | 0.00000000   | -8.54976000  | -1.46208500 |
| C        | 0.00000000   | -9.11160200  | -0.19912500 |
| C        | 0.00000000   | -10.50236100 | 0.17673300  |
| C        | 0.00000000   | -11.06525500 | 1.43893700  |
| C        | 0.00000000   | -12.47816800 | 1.43562600  |
| C        | 0.00000000   | -13.03511900 | 0.17088100  |



|            |             |              |             |
|------------|-------------|--------------|-------------|
| C          | 0.00000000  | -14.42484700 | -0.21168200 |
| C          | 0.00000000  | -14.98097500 | -1.47602100 |
| C          | 0.00000000  | -16.39506500 | -1.47900500 |
| C          | 0.00000000  | -16.95703300 | -0.21833100 |
| H          | 0.00000000  | 21.89984300  | -0.15150300 |
| S          | 0.00000000  | 19.61751800  | -1.06301000 |
| H          | 0.00000000  | 20.94378300  | 2.30762900  |
| S          | 0.00000000  | 15.69514600  | 1.00463800  |
| H          | 0.00000000  | 18.32149500  | 2.32683500  |
| S          | 0.00000000  | 11.76619400  | -1.04650500 |
| H          | 0.00000000  | 16.98793900  | -2.38669200 |
| S          | 0.00000000  | 7.84692200   | 1.02304800  |
| H          | 0.00000000  | 14.38419900  | -2.38116700 |
| S          | 0.00000000  | 3.92200700   | -1.03570000 |
| H          | 0.00000000  | 13.07522800  | 2.34054000  |
| S          | 0.00000000  | 0.00000000   | 1.02851900  |
| H          | 0.00000000  | 10.47251000  | 2.34672100  |
| S          | 0.00000000  | -3.92200700  | -1.03570000 |
| H          | 0.00000000  | 9.14348300   | -2.36918600 |
| S          | 0.00000000  | -7.84692200  | 1.02304800  |
| H          | 0.00000000  | 6.54117800   | -2.36575600 |
| S          | 0.00000000  | -11.76619400 | -1.04650500 |
| H          | 0.00000000  | 5.22554600   | 2.35393500  |
| S          | 0.00000000  | -15.69514600 | 1.00463800  |
| H          | 0.00000000  | 2.62320100   | 2.35577600  |
| H          | 0.00000000  | 1.30110800   | -2.36210400 |
| H          | 0.00000000  | -1.30110800  | -2.36210400 |
| H          | 0.00000000  | -2.62320100  | 2.35577600  |
| H          | 0.00000000  | -5.22554600  | 2.35393500  |
| H          | 0.00000000  | -6.54117800  | -2.36575600 |
| H          | 0.00000000  | -9.14348300  | -2.36918600 |
| H          | 0.00000000  | -10.47251000 | 2.34672100  |
| H          | 0.00000000  | -13.07522800 | 2.34054000  |
| H          | 0.00000000  | -14.38419900 | -2.38116700 |
| H          | 0.00000000  | -16.98793900 | -2.38669200 |
| C          | 0.00000000  | -18.35297400 | 0.15832900  |
| C          | 0.00000000  | -18.91410700 | 1.41888100  |
| S          | 0.00000000  | -19.61751800 | -1.06301000 |
| C          | 0.00000000  | -20.33662700 | 1.40990500  |
| H          | 0.00000000  | -18.32149500 | 2.32683500  |
| C          | 0.00000000  | -20.86104000 | 0.14696800  |
| H          | 0.00000000  | -20.94378300 | 2.30762900  |
| H          | 0.00000000  | -21.89984300 | -0.15150300 |
| H C-shaped |             |              |             |
| C          | -1.26574300 | -0.22504200  | -0.75589200 |
| C          | -0.70652900 | -1.48593900  | -0.84287100 |
| C          | 0.70652800  | -1.48593900  | -0.84287100 |
| C          | 1.26574300  | -0.22504200  | -0.75589200 |

|   |             |            |            |
|---|-------------|------------|------------|
| S | 0.0000000   | 0.9907070  | -0.6507710 |
| H | -1.3025900  | -2.3876870 | -0.9258370 |
| H | 1.3025900   | -2.3876870 | -0.9258370 |
| C | 2.6560810   | 0.1539270  | -0.7376040 |
| C | 3.2185670   | 1.4113160  | -0.8503340 |
| S | 3.9166950   | -1.0559600 | -0.5421020 |
| C | 4.6307200   | 1.4126170  | -0.7994210 |
| H | 2.6262720   | 2.3088620  | -0.9878880 |
| C | 5.1858130   | 0.1562410  | -0.6463720 |
| H | 5.2299890   | 2.3110180  | -0.8945440 |
| C | 6.5746260   | -0.2203340 | -0.5645890 |
| C | 7.1417660   | -1.4792580 | -0.6222410 |
| S | 7.8259800   | 0.9963720  | -0.3528480 |
| C | 8.5511770   | -1.4767370 | -0.5179410 |
| H | 6.5557640   | -2.3810290 | -0.7591690 |
| C | 9.0989970   | -0.2158050 | -0.3778190 |
| H | 9.1545540   | -2.3760640 | -0.5673570 |
| C | -2.6560810  | 0.1539270  | -0.7376050 |
| C | -3.2185670  | 1.4113160  | -0.8503340 |
| S | -3.9166950  | -1.0559600 | -0.5421030 |
| C | -4.6307200  | 1.4126170  | -0.7994210 |
| H | -2.6262720  | 2.3088620  | -0.9878880 |
| C | -5.1858130  | 0.1562410  | -0.6463720 |
| H | -5.2299890  | 2.3110180  | -0.8945440 |
| C | -6.5746260  | -0.2203340 | -0.5645900 |
| C | -7.1417660  | -1.4792580 | -0.6222420 |
| S | -7.8259800  | 0.9963720  | -0.3528480 |
| C | -8.5511770  | -1.4767370 | -0.5179410 |
| H | -6.5557640  | -2.3810290 | -0.7591700 |
| C | -9.0989970  | -0.2158050 | -0.3778190 |
| H | -9.1545540  | -2.3760640 | -0.5673580 |
| C | 10.4836090  | 0.1659670  | -0.2544700 |
| C | 11.0520560  | 1.4226410  | -0.3371860 |
| S | 11.7256970  | -1.0394080 | 0.0541570  |
| C | 12.4566380  | 1.4263820  | -0.1774200 |
| H | 10.4717940  | 2.3173190  | -0.5326430 |
| C | 12.9982720  | 0.1727970  | 0.0317000  |
| H | 13.0620680  | 2.3235450  | -0.2392160 |
| C | 14.3780200  | -0.2021110 | 0.2229230  |
| C | 14.9549610  | -1.4560220 | 0.1779040  |
| S | 15.5987560  | 1.0116210  | 0.5780430  |
| C | 16.3524820  | -1.4500480 | 0.3998460  |
| H | 14.3887240  | -2.3551490 | -0.0373100 |
| C | 16.8763780  | -0.1927650 | 0.6206630  |
| H | 16.9658170  | -2.3435300 | 0.3713370  |
| C | -10.4836090 | 0.1659670  | -0.2544710 |
| C | -11.0520560 | 1.4226410  | -0.3371870 |
| S | -11.7256970 | -1.0394080 | 0.0541560  |

|            |              |             |             |
|------------|--------------|-------------|-------------|
| C          | -12.45663800 | 1.42638200  | -0.17742000 |
| H          | -10.47179400 | 2.31731900  | -0.53264300 |
| C          | -12.99827200 | 0.17279700  | 0.03170000  |
| H          | -13.06206800 | 2.32354500  | -0.23921600 |
| C          | -14.37802000 | -0.20211100 | 0.22292200  |
| C          | -14.95496100 | -1.45602200 | 0.17790400  |
| S          | -15.59875600 | 1.01162100  | 0.57804300  |
| C          | -16.35248200 | -1.45004800 | 0.39984600  |
| H          | -14.38872400 | -2.35514900 | -0.03731000 |
| C          | -16.87637800 | -0.19276500 | 0.62066300  |
| H          | -16.96581700 | -2.34352900 | 0.37133700  |
| C          | 18.24800400  | 0.19501000  | 0.86850400  |
| C          | 18.82864800  | 1.44265100  | 0.77427600  |
| S          | 19.44292900  | -0.99052600 | 1.37271100  |
| C          | 20.21546000  | 1.45018800  | 1.09237700  |
| H          | 18.27820900  | 2.32401800  | 0.46509300  |
| C          | 20.69181100  | 0.21255700  | 1.42697400  |
| H          | 20.83418900  | 2.33958900  | 1.06485800  |
| H          | 21.69792700  | -0.06954500 | 1.70346400  |
| C          | -18.24800400 | 0.19501000  | 0.86850400  |
| C          | -18.82864800 | 1.44265100  | 0.77427600  |
| S          | -19.44292900 | -0.99052600 | 1.37271100  |
| C          | -20.21545900 | 1.45018800  | 1.09237800  |
| H          | -18.27821000 | 2.32401800  | 0.46509300  |
| C          | -20.69181100 | 0.21255700  | 1.42697600  |
| H          | -20.83418800 | 2.33958900  | 1.06486000  |
| H          | -21.69792600 | -0.06954400 | 1.70346700  |
| H S-shaped |              |             |             |
| C          | 1.26483000   | -0.20397500 | 0.06051200  |
| C          | 0.70544600   | -1.46771000 | 0.03345300  |
| C          | -0.70543500  | -1.46771100 | -0.03597300 |
| C          | -1.26484800  | -0.20397700 | -0.06244300 |
| S          | -0.00002700  | 1.01641700  | -0.00062900 |
| H          | 1.29962900   | -2.37396000 | 0.06546900  |
| H          | -1.29959300  | -2.37395800 | -0.06850900 |
| C          | -2.65344500  | 0.17414300  | -0.12814300 |
| C          | -3.21060900  | 1.43603300  | -0.21695500 |
| S          | -3.92171100  | -1.04387000 | -0.09789100 |
| C          | -4.62229900  | 1.43586300  | -0.27105700 |
| H          | -2.61387000  | 2.34047600  | -0.25271500 |
| C          | -5.18392000  | 0.17381600  | -0.22427800 |
| H          | -5.21521500  | 2.33941200  | -0.35682300 |
| C          | 2.65342000   | 0.17414700  | 0.12634100  |
| C          | 3.21058500   | 1.43605800  | 0.21485300  |
| S          | 3.92167800   | -1.04389200 | 0.09672900  |
| C          | 4.62226400   | 1.43589200  | 0.26918300  |
| H          | 2.61385400   | 2.34052500  | 0.25016100  |
| C          | 5.18388300   | 0.17382500  | 0.22287800  |

|   |              |             |             |
|---|--------------|-------------|-------------|
| H | 5.21517400   | 2.33946700  | 0.35471900  |
| C | 6.57370200   | -0.20467300 | 0.26032000  |
| C | 7.13200200   | -1.46361100 | 0.37686200  |
| S | 7.84101900   | 1.00896000  | 0.14585000  |
| C | 8.54494800   | -1.46368900 | 0.39069800  |
| H | 6.53538100   | -2.36412500 | 0.46896400  |
| C | 9.10533200   | -0.20480500 | 0.28491200  |
| H | 9.13991900   | -2.36385500 | 0.49557500  |
| C | -6.57374700  | -0.20468600 | -0.26141300 |
| C | -7.13206900  | -1.46362500 | -0.37782800 |
| S | -7.84103800  | 1.00894400  | -0.14665200 |
| C | -8.54501900  | -1.46370500 | -0.39135200 |
| H | -6.53546400  | -2.36413300 | -0.47008300 |
| C | -9.10538000  | -0.20482100 | -0.28544800 |
| H | -9.14001300  | -2.36386900 | -0.49610800 |
| C | 10.49608900  | 0.17346700  | 0.27256000  |
| C | 11.05806400  | 1.43274800  | 0.36112000  |
| S | 11.75824600  | -1.04125900 | 0.12118100  |
| C | 12.47115500  | 1.43202400  | 0.32721100  |
| H | 10.46502200  | 2.33377800  | 0.46984900  |
| C | 13.02661300  | 0.17229100  | 0.21176800  |
| H | 13.07028100  | 2.33185200  | 0.40861200  |
| C | -10.49613600 | 0.17345100  | -0.27279600 |
| C | -11.05813200 | 1.43272500  | -0.36133000 |
| S | -11.75825400 | -1.04126100 | -0.12099700 |
| C | -12.47121500 | 1.43200300  | -0.32707900 |
| H | -10.46511600 | 2.33374400  | -0.47028900 |
| C | -13.02664300 | 0.17227900  | -0.21139000 |
| H | -13.07036200 | 2.33182200  | -0.40842000 |
| C | 14.41688400  | -0.20773400 | 0.15604400  |
| C | 14.98337100  | -1.46152700 | 0.27637900  |
| S | 15.66927100  | 0.99757100  | -0.10577200 |
| C | 16.39524300  | -1.46183300 | 0.18357500  |
| H | 14.39702500  | -2.35615900 | 0.45305000  |
| C | 16.94144000  | -0.20965200 | -0.01086100 |
| H | 17.00016100  | -2.35596200 | 0.28306500  |
| C | -14.41690100 | -0.20774200 | -0.15529800 |
| C | -14.98342200 | -1.46153400 | -0.27547600 |
| S | -15.66921400 | 0.99756800  | 0.10684800  |
| C | -16.39527100 | -1.46183500 | -0.18229800 |
| H | -14.39712600 | -2.35616700 | -0.45230200 |
| C | -16.94141100 | -0.20965100 | 0.01227600  |
| H | -17.00021900 | -2.35596100 | -0.28162700 |
| C | 18.33128700  | 0.17057200  | -0.13992300 |
| C | 18.90457200  | 1.42016800  | -0.02748200 |
| S | 19.56453300  | -1.02939700 | -0.49621100 |
| C | 20.31504900  | 1.41801600  | -0.21476400 |
| H | 18.33052900  | 2.31055700  | 0.20291000  |

|            |              |             |             |
|------------|--------------|-------------|-------------|
| C          | 20.81670200  | 0.17113100  | -0.46804200 |
| H          | 20.93122700  | 2.30761200  | -0.15512300 |
| H          | 21.84331500  | -0.11919800 | -0.64138700 |
| C          | -18.33122300 | 0.17058000  | 0.14170000  |
| C          | -18.90453600 | 1.42017400  | 0.02937500  |
| S          | -19.56437600 | -1.02937500 | 0.49836000  |
| C          | -20.31496200 | 1.41803100  | 0.21703700  |
| H          | -18.33055300 | 2.31055300  | -0.20120100 |
| C          | -20.81654900 | 0.17115500  | 0.47048900  |
| H          | -20.93115400 | 2.30762700  | 0.15753300  |
| H          | -21.84311700 | -0.11916600 | 0.64411900  |
| <i>iPr</i> |              |             |             |
| C          | 17.75790700  | 6.72648800  | -0.78882300 |
| C          | 17.89027000  | 6.20334100  | 0.46485000  |
| C          | 17.12045400  | 5.01438600  | 0.68664400  |
| C          | 16.39504400  | 4.65487300  | -0.43679200 |
| C          | 15.49296500  | 3.53764400  | -0.68642800 |
| C          | 15.38392600  | 2.78894200  | -1.83620200 |
| C          | 14.36512900  | 1.79022500  | -1.81719100 |
| C          | 13.66844400  | 1.78478500  | -0.61829000 |
| C          | 12.58576300  | 0.94433200  | -0.12994000 |
| C          | 12.38125600  | 0.51008900  | 1.16177400  |
| C          | 11.19719600  | -0.25764100 | 1.36559200  |
| C          | 10.46906800  | -0.40652200 | 0.19479300  |
| C          | 9.23752800   | -1.12373600 | -0.09689700 |
| C          | 8.92367100   | -1.81199000 | -1.24876700 |
| C          | 7.61428700   | -2.37487300 | -1.28369600 |
| C          | 6.90098900   | -2.09851800 | -0.12673400 |
| C          | 5.56648800   | -2.48329900 | 0.30532100  |
| C          | 5.15868200   | -2.78807700 | 1.58598200  |
| C          | 3.77020800   | -3.07698300 | 1.73028500  |
| C          | 3.09318600   | -2.97926300 | 0.52358300  |
| C          | 1.70120700   | -3.21197600 | 0.17175800  |
| C          | 1.21308800   | -3.75735300 | -0.99600500 |
| C          | -0.20808800  | -3.81576500 | -1.09291600 |
| C          | -0.82564100  | -3.28746600 | 0.03102900  |
| C          | -2.22695600  | -3.16248600 | 0.39996300  |
| C          | -2.77263800  | -3.28322500 | 1.65970200  |
| C          | -4.17690600  | -3.05111500 | 1.73950900  |
| C          | -4.71978500  | -2.73179600 | 0.50374500  |
| C          | -6.08461500  | -2.44594200 | 0.09005300  |
| C          | -6.68947600  | -2.78987000 | -1.09954400 |
| C          | -8.02727300  | -2.32286400 | -1.25907300 |
| C          | -8.45381000  | -1.58941200 | -0.16203200 |
| C          | -9.72407800  | -0.94984400 | 0.14392900  |
| C          | -10.32971200 | -0.84386200 | 1.37720700  |
| C          | -11.54880500 | -0.10447700 | 1.39476200  |
| C          | -11.87875300 | 0.37891100  | 0.13809600  |

|   |              |             |             |
|---|--------------|-------------|-------------|
| C | -13.01770400 | 1.15358200  | -0.33236800 |
| C | -13.68132200 | 1.02650900  | -1.53274900 |
| C | -14.72757600 | 1.97211000  | -1.75069900 |
| C | -14.85655600 | 2.85442800  | -0.69081800 |
| C | -15.78533900 | 3.95290200  | -0.45446500 |
| C | -16.39638800 | 4.29539400  | 0.73022600  |
| C | -17.19676700 | 5.48066400  | 0.67078500  |
| C | -17.17421300 | 6.03528200  | -0.58298600 |
| S | 16.66645500  | 5.79277900  | -1.75249200 |
| S | 14.26958300  | 3.03579000  | 0.46191600  |
| S | 11.24988200  | 0.43069400  | -1.14022300 |
| S | 7.85647700   | -1.12150600 | 0.98081400  |
| S | 4.18488300   | -2.50548100 | -0.77162300 |
| S | 0.36586900   | -2.70222200 | 1.18473000  |
| S | -3.47551100  | -2.70065200 | -0.73897000 |
| S | -7.18022900  | -1.46758700 | 1.04463300  |
| S | -10.66084800 | -0.07104800 | -1.04781800 |
| S | -13.66645000 | 2.51645300  | 0.55727700  |
| S | -16.18300800 | 5.13880300  | -1.68894400 |
| H | 18.23488800  | 7.60475800  | -1.20120600 |
| H | 18.53177200  | 6.64422300  | 1.21959800  |
| H | 16.05293800  | 2.93580400  | -2.67647900 |
| H | 13.09589200  | 0.71456300  | 1.95090600  |
| H | 9.64381300   | -1.94001100 | -2.04891900 |
| H | 5.86149200   | -2.83658600 | 2.40987400  |
| H | 1.87464300   | -4.14381000 | -1.76300800 |
| H | -2.17075700  | -3.56920700 | 2.51489600  |
| H | -6.18458500  | -3.40205800 | -1.83830600 |
| H | -9.91533400  | -1.32274600 | 2.25719600  |
| H | -13.43875500 | 0.23872900  | -2.23721400 |
| H | -16.28391800 | 3.69849900  | 1.62932000  |
| H | -17.68807700 | 6.91937400  | -0.93246400 |
| C | -17.98367700 | 5.99937800  | 1.86061900  |
| C | -19.16419600 | 5.06246100  | 2.18872400  |
| C | -18.46878200 | 7.44357900  | 1.68175100  |
| H | -17.30226700 | 5.98189300  | 2.72358700  |
| H | -18.82867400 | 4.03411000  | 2.35310400  |
| H | -19.68503500 | 5.39752700  | 3.09224300  |
| H | -19.88537000 | 5.04960300  | 1.36435400  |
| H | -17.63860800 | 8.12281700  | 1.46511200  |
| H | -19.19344400 | 7.52032600  | 0.86309700  |
| H | -18.96610400 | 7.79452700  | 2.59126700  |
| C | -15.60781500 | 1.94478600  | -2.98712200 |
| C | -16.27828700 | 0.57073200  | -3.17544800 |
| C | -14.81913000 | 2.35249700  | -4.24669500 |
| H | -16.40703500 | 2.67874100  | -2.84353100 |
| H | -16.85130300 | 0.28408600  | -2.28863900 |
| H | -16.96263100 | 0.59574400  | -4.03021500 |

|   |              |             |             |
|---|--------------|-------------|-------------|
| H | -15.54023100 | -0.21567300 | -3.36707400 |
| H | -14.38175500 | 3.34942400  | -4.13725600 |
| H | -14.00213400 | 1.64999200  | -4.44545500 |
| H | -15.47383800 | 2.36197100  | -5.12482400 |
| C | -12.38077500 | 0.06499800  | 2.65353900  |
| C | -11.70651900 | 1.03516100  | 3.64335800  |
| C | -12.68091900 | -1.28827900 | 3.32494600  |
| H | -13.34119100 | 0.50243700  | 2.36282800  |
| H | -11.54239800 | 2.01697500  | 3.18927200  |
| H | -12.32939300 | 1.17120000  | 4.53413600  |
| H | -10.73324900 | 0.65212300  | 3.96962900  |
| H | -13.17408000 | -1.97540900 | 2.63099700  |
| H | -11.76664000 | -1.77254600 | 3.68448500  |
| H | -13.33872400 | -1.14505200 | 4.18878200  |
| C | -8.86563800  | -2.65525000 | -2.48034800 |
| C | -8.89589600  | -4.17003400 | -2.75779700 |
| C | -8.38307800  | -1.87553400 | -3.71926200 |
| H | -9.89470300  | -2.34450600 | -2.27394500 |
| H | -9.25020400  | -4.72658900 | -1.88507800 |
| H | -9.56547600  | -4.38856000 | -3.59642400 |
| H | -7.90412900  | -4.55328400 | -3.02075200 |
| H | -8.41345800  | -0.79548800 | -3.54691400 |
| H | -7.35227500  | -2.14304800 | -3.97681500 |
| H | -9.01458700  | -2.10025300 | -4.58567800 |
| C | -4.95309200  | -3.19714400 | 3.03627600  |
| C | -4.64999200  | -2.03556900 | 4.00322000  |
| C | -4.69086100  | -4.55753500 | 3.70940500  |
| H | -6.01983300  | -3.15712000 | 2.79404500  |
| H | -4.88841000  | -1.06804500 | 3.55136400  |
| H | -5.23714200  | -2.13663900 | 4.92246300  |
| H | -3.59040600  | -2.02116300 | 4.28163400  |
| H | -4.91388100  | -5.38644000 | 3.03112800  |
| H | -3.64806100  | -4.65614900 | 4.02946600  |
| H | -5.31940100  | -4.66647800 | 4.59959700  |
| C | -0.91801200  | -4.43850800 | -2.28166300 |
| C | -0.39491900  | -5.85604700 | -2.58131100 |
| C | -0.81710500  | -3.53776400 | -3.52838800 |
| H | -1.97812200  | -4.53352900 | -2.02606200 |
| H | -0.47134400  | -6.50217300 | -1.70176100 |
| H | -0.97609700  | -6.31121700 | -3.39029800 |
| H | 0.65347500   | -5.84182100 | -2.89818300 |
| H | -1.23812000  | -2.54587800 | -3.33855300 |
| H | 0.22642200   | -3.40383800 | -3.83419000 |
| H | -1.35908500  | -3.98273200 | -4.36998800 |
| C | 3.15813300   | -3.48728300 | 3.05772300  |
| C | 3.06152400   | -2.28917000 | 4.02280200  |
| C | 3.92450300   | -4.65611800 | 3.70503200  |
| H | 2.14001400   | -3.83831800 | 2.86201400  |

|    |             |             |             |
|----|-------------|-------------|-------------|
| H  | 2.47217200  | -1.47510900 | 3.59025200  |
| H  | 2.58826700  | -2.58979000 | 4.96395000  |
| H  | 4.05518900  | -1.89234300 | 4.25879300  |
| H  | 3.98748800  | -5.51342000 | 3.02829800  |
| H  | 4.94520500  | -4.36859300 | 3.97927700  |
| H  | 3.41757000  | -4.98005600 | 4.62010400  |
| C  | 7.12001500  | -3.21298800 | -2.44913300 |
| C  | 8.09717100  | -4.35477300 | -2.78722300 |
| C  | 6.84250400  | -2.33869600 | -3.68800600 |
| H  | 6.17409800  | -3.67599300 | -2.15071900 |
| H  | 8.28887600  | -4.98510300 | -1.91379000 |
| H  | 7.68211800  | -4.98695100 | -3.57936400 |
| H  | 9.05958100  | -3.97169800 | -3.14307100 |
| H  | 6.11133400  | -1.55515400 | -3.46764100 |
| H  | 7.75847000  | -1.85017500 | -4.03856500 |
| H  | 6.45166000  | -2.94806600 | -4.51015300 |
| C  | 10.84385100 | -0.86493700 | 2.71143400  |
| C  | 10.40939000 | 0.21834800  | 3.71801200  |
| C  | 12.00023100 | -1.71189100 | 3.27580400  |
| H  | 9.99360200  | -1.53793700 | 2.56233200  |
| H  | 9.55460500  | 0.78981600  | 3.34395400  |
| H  | 10.12400800 | -0.23609700 | 4.67303900  |
| H  | 11.22312000 | 0.92555900  | 3.91350600  |
| H  | 12.29826400 | -2.49523100 | 2.57260400  |
| H  | 12.88275200 | -1.09959800 | 3.49003600  |
| H  | 11.69713000 | -2.19149500 | 4.21257000  |
| C  | 14.14030800 | 0.83743100  | -2.97777400 |
| C  | 15.44256200 | 0.12749900  | -3.39398800 |
| C  | 13.49753700 | 1.56059200  | -4.17768900 |
| H  | 13.44286200 | 0.06239200  | -2.64461200 |
| H  | 15.89254100 | -0.40335300 | -2.54977400 |
| H  | 15.24049300 | -0.60083000 | -4.18652300 |
| H  | 16.18412100 | 0.83551300  | -3.77917700 |
| H  | 12.54341900 | 2.01964700  | -3.90185300 |
| H  | 14.15179400 | 2.35381900  | -4.55624500 |
| H  | 13.31355700 | 0.85764700  | -4.99747800 |
| C  | 17.16028500 | 4.24791100  | 1.99619400  |
| C  | 16.47045600 | 5.03169800  | 3.12964200  |
| C  | 18.60167800 | 3.86822100  | 2.38534500  |
| H  | 16.60630500 | 3.31443000  | 1.85425300  |
| H  | 15.43032900 | 5.26131600  | 2.87949900  |
| H  | 16.47742400 | 4.45161900  | 4.05892000  |
| H  | 16.98338400 | 5.98029300  | 3.32407500  |
| H  | 19.08717700 | 3.29101400  | 1.59285500  |
| H  | 19.21446400 | 4.75560400  | 2.57749800  |
| H  | 18.60300900 | 3.26307600  | 3.29827200  |
| Li |             |             |             |
| C  | 21.01590600 | 0.15966400  | -0.04845200 |



|   |              |             |             |
|---|--------------|-------------|-------------|
| C | 20.45797800  | 1.36062300  | 0.30732100  |
| C | 19.02220300  | 1.39854000  | 0.34778800  |
| C | 18.52806300  | 0.14873800  | -0.00240900 |
| C | 17.13568700  | -0.26492900 | -0.04459900 |
| C | 16.52187200  | -1.46940500 | 0.22406400  |
| C | 15.08730300  | -1.49200200 | 0.23449300  |
| C | 14.58634800  | -0.23124800 | -0.03852100 |
| C | 13.20555800  | 0.19835100  | -0.07131500 |
| C | 12.60358200  | 1.41011500  | 0.20128300  |
| C | 11.17063800  | 1.44478100  | 0.22649600  |
| C | 10.65547900  | 0.18875600  | -0.04128900 |
| C | 9.27256500   | -0.23406400 | -0.05910700 |
| C | 8.66884500   | -1.43932900 | 0.23750100  |
| C | 7.23624200   | -1.46908500 | 0.27283900  |
| C | 6.72331200   | -0.21598100 | -0.01134400 |
| C | 5.34113800   | 0.20967300  | -0.03094200 |
| C | 4.74121400   | 1.42261700  | 0.24043000  |
| C | 3.30861700   | 1.45594000  | 0.28083400  |
| C | 2.79287800   | 0.19732300  | 0.02926600  |
| C | 1.40983700   | -0.22717900 | 0.02473700  |
| C | 0.80985300   | -1.42904700 | 0.34059400  |
| C | -0.62272700  | -1.46080500 | 0.38135700  |
| C | -1.13788400  | -0.21222000 | 0.08299000  |
| C | -2.52143100  | 0.20984000  | 0.05702100  |
| C | -3.12422800  | 1.42434300  | 0.31351200  |
| C | -4.55713600  | 1.45535800  | 0.34761700  |
| C | -5.06878900  | 0.19287500  | 0.10820200  |
| C | -6.45155500  | -0.23302400 | 0.09752200  |
| C | -7.05318600  | -1.43153200 | 0.42221100  |
| C | -8.48619600  | -1.46480400 | 0.44635000  |
| C | -8.99884700  | -0.22073200 | 0.12615200  |
| C | -10.38308900 | 0.19674300  | 0.07305100  |
| C | -10.99345700 | 1.41325800  | 0.29918200  |
| C | -12.42707500 | 1.43999200  | 0.30451400  |
| C | -12.92989400 | 0.17258400  | 0.07511100  |
| C | -14.31234800 | -0.25616000 | 0.03846200  |
| C | -14.92089800 | -1.44690400 | 0.37445600  |
| C | -16.35530000 | -1.48385500 | 0.35080800  |
| C | -16.85807100 | -0.25182200 | -0.01825000 |
| C | -18.24655200 | 0.15241900  | -0.13949000 |
| C | -18.88352700 | 1.35670800  | 0.04793400  |
| C | -20.32960300 | 1.35836400  | -0.03710900 |
| C | -20.77602200 | 0.08692400  | -0.28416300 |
| S | 19.80579700  | -1.04055600 | -0.37668400 |
| S | 15.89278500  | 0.95423000  | -0.40964100 |
| S | 11.94998800  | -1.00669300 | -0.43075500 |
| S | 8.01867600   | 0.96964300  | -0.42867600 |
| S | 4.08429600   | -1.00002400 | -0.36559700 |

|             |              |             |             |
|-------------|--------------|-------------|-------------|
| S           | 0.15372000   | 0.97024800  | -0.35330800 |
| S           | -3.77383800  | -1.00641500 | -0.26691800 |
| S           | -7.70425900  | 0.95827000  | -0.30837900 |
| S           | -11.62528400 | -1.02854000 | -0.25411900 |
| S           | -15.55494800 | 0.92122200  | -0.43653900 |
| S           | -19.45831600 | -1.08528300 | -0.51890500 |
| H           | 22.06438200  | -0.09441100 | -0.14444500 |
| H           | 21.08385100  | 2.21791200  | 0.54559900  |
| H           | 17.12869100  | -2.33605600 | 0.47460000  |
| H           | 13.21789500  | 2.27461100  | 0.44332900  |
| H           | 9.28236100   | -2.30119500 | 0.49083000  |
| H           | 5.35711600   | 2.28948300  | 0.46997800  |
| H           | 1.42573900   | -2.28673300 | 0.60241800  |
| H           | -2.51090300  | 2.29509300  | 0.53513600  |
| H           | -6.43926100  | -2.28516300 | 0.70119100  |
| H           | -10.38712900 | 2.28957500  | 0.51768600  |
| H           | -14.31468400 | -2.29172200 | 0.69356500  |
| H           | -18.30394200 | 2.24383600  | 0.29359200  |
| H           | -21.78414400 | -0.28724800 | -0.41980900 |
| Li          | -21.62739300 | 2.83840200  | 0.07562800  |
| Li          | -17.98349000 | -2.53551600 | 0.83128000  |
| Li          | -14.06878200 | 2.49145000  | 0.71913000  |
| Li          | -10.10705000 | -2.50865900 | 0.96508600  |
| Li          | -6.18558200  | 2.51168800  | 0.81163200  |
| Li          | -2.24291000  | -2.49949600 | 0.91043800  |
| Li          | 1.68357400   | 2.50487300  | 0.77059900  |
| Li          | 5.61318200   | -2.50579000 | 0.79292800  |
| Li          | 9.54381300   | 2.48495700  | 0.72203600  |
| Li          | 13.46222500  | -2.53469600 | 0.72501200  |
| Li          | 17.38518900  | 2.37010900  | 0.89823500  |
| <i>n</i> Bu |              |             |             |
| C           | 19.93315000  | -0.87173400 | 4.84717300  |
| C           | 19.83196900  | -1.94821500 | 4.01439500  |
| C           | 18.72002300  | -1.88820800 | 3.11247500  |
| C           | 17.97570400  | -0.73347100 | 3.28715600  |
| C           | 16.78425900  | -0.23899700 | 2.61096200  |
| C           | 16.49543500  | 1.06522100  | 2.27333200  |
| C           | 15.21974900  | 1.26977100  | 1.67352400  |
| C           | 14.50892900  | 0.08156100  | 1.54994100  |
| C           | 13.21089400  | -0.20386400 | 0.97239500  |
| C           | 12.76997100  | -1.40774900 | 0.45776700  |
| C           | 11.42351500  | -1.42017600 | 0.00575000  |
| C           | 10.80510600  | -0.18415100 | 0.17501800  |
| C           | 9.47749800   | 0.27781400  | -0.16841200 |
| C           | 9.05461100   | 1.58727300  | -0.30676000 |
| C           | 7.67620400   | 1.75511300  | -0.60316300 |
| C           | 7.01237700   | 0.53574100  | -0.70214200 |
| C           | 5.63848500   | 0.21424100  | -1.02396900 |

|   |              |             |             |
|---|--------------|-------------|-------------|
| C | 5.15431100   | -0.97650400 | -1.53306200 |
| C | 3.74626300   | -1.03772700 | -1.70574000 |
| C | 3.12167100   | 0.14509300  | -1.31959700 |
| C | 1.73332000   | 0.55131800  | -1.35539500 |
| C | 1.23616000   | 1.84149200  | -1.36611900 |
| C | -0.17927100  | 1.94946800  | -1.34791200 |
| C | -0.79813100  | 0.70189200  | -1.32644700 |
| C | -2.19367300  | 0.32260000  | -1.34741900 |
| C | -2.72063700  | -0.91075600 | -1.68545100 |
| C | -4.13068600  | -1.02378800 | -1.57188700 |
| C | -4.71629700  | 0.16285600  | -1.13775000 |
| C | -6.10017300  | 0.52597000  | -0.92435000 |
| C | -6.63444200  | 1.80044600  | -0.87006200 |
| C | -8.02728900  | 1.86702800  | -0.60256700 |
| C | -8.58988200  | 0.60313100  | -0.44816000 |
| C | -9.95453800  | 0.18180600  | -0.21316000 |
| C | -10.50565100 | -1.05788700 | -0.47932800 |
| C | -11.86616000 | -1.21398800 | -0.10154100 |
| C | -12.38296900 | -0.05713700 | 0.47195600  |
| C | -13.71052300 | 0.26127600  | 0.95923500  |
| C | -14.28312500 | 1.51172800  | 1.07946500  |
| C | -15.59036500 | 1.53094500  | 1.64318700  |
| C | -16.03460200 | 0.26046000  | 1.97013600  |
| C | -17.29598900 | -0.20937000 | 2.52865100  |
| C | -18.01760300 | -1.32098400 | 2.15550200  |
| C | -19.19107700 | -1.55916800 | 2.93891000  |
| C | -19.34170900 | -0.61258100 | 3.91843400  |
| S | 18.65390300  | 0.26033100  | 4.57367300  |
| S | 15.42127900  | -1.26466500 | 2.21943600  |
| S | 11.90621400  | 0.96464700  | 0.92403800  |
| S | 8.11264600   | -0.79993600 | -0.39267200 |
| S | 4.29970200   | 1.30382400  | -0.71786400 |
| S | 0.39992400   | -0.58537900 | -1.29585300 |
| S | -3.49154500  | 1.39090900  | -0.84746600 |
| S | -7.36453100  | -0.64736500 | -0.60865700 |
| S | -11.15590200 | 1.19782900  | 0.56050500  |
| S | -14.81530600 | -0.94648200 | 1.59075600  |
| S | -18.06330100 | 0.55991200  | 3.91124300  |
| H | 20.67712700  | -0.68056200 | 5.60798100  |
| H | 20.53391600  | -2.77516700 | 4.02972800  |
| H | 17.21234800  | 1.86159200  | 2.43025700  |
| H | 13.42456000  | -2.26696200 | 0.38356900  |
| H | 9.74312600   | 2.41890800  | -0.22174600 |
| H | 5.81741100   | -1.78755100 | -1.80729900 |
| H | 1.89151900   | 2.70209400  | -1.41489000 |
| H | -2.09258900  | -1.71932900 | -2.03808300 |
| H | -6.02811500  | 2.67920400  | -1.05131200 |
| H | -9.93798500  | -1.83820600 | -0.97084200 |

|   |              |             |             |
|---|--------------|-------------|-------------|
| H | -13.78019100 | 2.41192300  | 0.74212000  |
| H | -17.72628600 | -1.94150800 | 1.31462200  |
| H | -20.14383300 | -0.52791200 | 4.63934300  |
| C | -20.13423000 | -2.71479300 | 2.71256700  |
| C | -19.56147200 | -4.07417100 | 3.15757500  |
| H | -20.39385800 | -2.76919100 | 1.64650900  |
| H | -21.07305800 | -2.52673400 | 3.24721900  |
| C | -20.52333800 | -5.24173700 | 2.90807000  |
| H | -18.61519900 | -4.26024900 | 2.63201000  |
| H | -19.30982700 | -4.02316600 | 4.22502600  |
| C | -19.96043400 | -6.59280800 | 3.35881400  |
| H | -21.47070100 | -5.04746200 | 3.42934000  |
| H | -20.77028200 | -5.28534300 | 1.83844200  |
| H | -20.66921100 | -7.40515400 | 3.16835500  |
| H | -19.03096100 | -6.83170600 | 2.82972300  |
| H | -19.73713800 | -6.59076600 | 4.43160400  |
| C | -16.38945300 | 2.80824500  | 1.75237000  |
| C | -16.83523200 | 3.36013900  | 0.38314500  |
| H | -15.78289900 | 3.56788700  | 2.26383500  |
| H | -17.27423400 | 2.65195300  | 2.37463700  |
| C | -17.62684700 | 4.66847800  | 0.49545800  |
| H | -15.95484600 | 3.51812100  | -0.25384800 |
| H | -17.44541000 | 2.60153400  | -0.12406300 |
| C | -18.07611900 | 5.21706400  | -0.86214900 |
| H | -18.50528700 | 4.50572200  | 1.13425900  |
| H | -17.01310000 | 5.42044500  | 1.01015700  |
| H | -18.63777700 | 6.15018100  | -0.75066600 |
| H | -17.21703500 | 5.42136800  | -1.51114600 |
| H | -18.72058500 | 4.50120300  | -1.38463500 |
| C | -12.65845800 | -2.48364600 | -0.33288500 |
| C | -12.06535900 | -3.44915700 | -1.36951800 |
| H | -13.67738400 | -2.21720700 | -0.63955900 |
| H | -12.77178600 | -3.02160300 | 0.61961100  |
| C | -12.96185700 | -4.66793100 | -1.62088800 |
| H | -11.90024900 | -2.91634500 | -2.31539400 |
| H | -11.07948000 | -3.79736900 | -1.03444400 |
| C | -12.37175500 | -5.64718700 | -2.63968800 |
| H | -13.13886400 | -5.18984600 | -0.67069300 |
| H | -13.94672900 | -4.32704700 | -1.96734400 |
| H | -13.03511400 | -6.50278100 | -2.80156300 |
| H | -12.21180900 | -5.16205400 | -3.60919900 |
| H | -11.40439100 | -6.03597700 | -2.30197100 |
| C | -8.80470000  | 3.16429700  | -0.52959300 |
| C | -8.10851000  | 4.38746000  | -1.14383400 |
| H | -9.04170300  | 3.38826000  | 0.52079100  |
| H | -9.77477500  | 3.02605900  | -1.02310100 |
| C | -8.99070100  | 5.64176800  | -1.11446900 |
| H | -7.17512100  | 4.59711600  | -0.60492700 |

|   |             |             |             |
|---|-------------|-------------|-------------|
| H | -7.82420700 | 4.16577800  | -2.18105800 |
| C | -8.30634400 | 6.87213100  | -1.71679600 |
| H | -9.92433500 | 5.43940700  | -1.65624100 |
| H | -9.28228200 | 5.85532700  | -0.07723800 |
| H | -8.96006300 | 7.74949800  | -1.68223500 |
| H | -7.38746800 | 7.12098900  | -1.17385900 |
| H | -8.03420500 | 6.70131600  | -2.76449800 |
| C | -4.90019300 | -2.28218900 | -1.91358700 |
| C | -4.11541400 | -3.34888100 | -2.69038600 |
| H | -5.79259000 | -2.00908400 | -2.49113700 |
| H | -5.28081800 | -2.73708700 | -0.98758900 |
| C | -4.97954100 | -4.56123100 | -3.05882500 |
| H | -3.69890600 | -2.90715700 | -3.60544800 |
| H | -3.25950000 | -3.69046800 | -2.09352900 |
| C | -4.20460600 | -5.64237100 | -3.81771800 |
| H | -5.40813200 | -4.99175000 | -2.14372200 |
| H | -5.83225600 | -4.22685400 | -3.66480400 |
| H | -4.84639700 | -6.49346100 | -4.06678400 |
| H | -3.79261900 | -5.25110200 | -4.75481200 |
| H | -3.36654200 | -6.02120000 | -3.22183500 |
| C | -0.91849500 | 3.27051200  | -1.38002200 |
| C | -0.06764600 | 4.49717900  | -1.73827300 |
| H | -1.38841300 | 3.44711200  | -0.40162300 |
| H | -1.74997100 | 3.19717800  | -2.09267500 |
| C | -0.89737500 | 5.78462400  | -1.81759600 |
| H | 0.72662100  | 4.63113100  | -0.99207900 |
| H | 0.43558000  | 4.32828600  | -2.69961500 |
| C | -0.05897300 | 7.01900500  | -2.16177100 |
| H | -1.69001500 | 5.65831500  | -2.56728400 |
| H | -1.40952500 | 5.94480600  | -0.85918700 |
| H | -0.67789200 | 7.92043100  | -2.21319700 |
| H | 0.71888800  | 7.19235800  | -1.40955500 |
| H | 0.43941500  | 6.90210400  | -3.13070200 |
| C | 3.02555100  | -2.24024800 | -2.27786200 |
| C | 3.90989800  | -3.23684500 | -3.04125900 |
| H | 2.22767300  | -1.89258200 | -2.94570900 |
| H | 2.51317400  | -2.77833700 | -1.46699500 |
| C | 3.10267200  | -4.38037300 | -3.66808400 |
| H | 4.46466500  | -2.70764900 | -3.82736100 |
| H | 4.66254900  | -3.66345800 | -2.36528100 |
| C | 3.97516200  | -5.38898700 | -4.42087400 |
| H | 2.53849000  | -4.89914800 | -2.88113100 |
| H | 2.35270200  | -3.96120400 | -4.35219600 |
| H | 3.37179600  | -6.19133800 | -4.85727300 |
| H | 4.52601400  | -4.90611400 | -5.23587400 |
| H | 4.71149900  | -5.85193700 | -3.75413900 |
| C | 7.02360200  | 3.10448400  | -0.81730600 |
| C | 7.98622800  | 4.26332900  | -1.11531200 |

|   |             |             |             |
|---|-------------|-------------|-------------|
| H | 6.42714100  | 3.36545700  | 0.06910900  |
| H | 6.30223000  | 3.02445800  | -1.63986700 |
| C | 7.25157000  | 5.57702300  | -1.40964400 |
| H | 8.66098000  | 4.41781500  | -0.26306100 |
| H | 8.62282100  | 4.00089700  | -1.97062900 |
| C | 8.20004000  | 6.74341300  | -1.70144000 |
| H | 6.57728900  | 5.43068900  | -2.26411600 |
| H | 6.60863200  | 5.83141600  | -0.55618500 |
| H | 7.64719000  | 7.66485400  | -1.91027000 |
| H | 8.86265100  | 6.93924200  | -0.85074300 |
| H | 8.83303700  | 6.53115200  | -2.57040200 |
| C | 10.76083500 | -2.63265200 | -0.61386200 |
| C | 11.70919400 | -3.77160100 | -1.01526300 |
| H | 10.19366000 | -2.31685700 | -1.49881600 |
| H | 10.01176500 | -3.03387900 | 0.08408100  |
| C | 10.97639900 | -4.93279500 | -1.69852100 |
| H | 12.48568000 | -3.38431400 | -1.68829500 |
| H | 12.23061700 | -4.15303200 | -0.12750200 |
| C | 11.90855600 | -6.08123900 | -2.09504400 |
| H | 10.19316500 | -5.31112500 | -1.02774300 |
| H | 10.45641900 | -4.55748900 | -2.59016600 |
| H | 11.35716700 | -6.89362800 | -2.57907100 |
| H | 12.68134300 | -5.74156200 | -2.79375700 |
| H | 12.41676900 | -6.50027600 | -1.21928200 |
| C | 14.72449500 | 2.62043900  | 1.20054800  |
| C | 15.81558600 | 3.67890700  | 0.98032000  |
| H | 13.99609900 | 3.01615300  | 1.92357700  |
| H | 14.16502300 | 2.48889500  | 0.26637700  |
| C | 15.25773700 | 4.99269900  | 0.41911700  |
| H | 16.32940400 | 3.88812400  | 1.92770100  |
| H | 16.57774300 | 3.28338000  | 0.29593400  |
| C | 16.33519500 | 6.06096400  | 0.21133600  |
| H | 14.75042500 | 4.79256400  | -0.53424100 |
| H | 14.48534800 | 5.37769700  | 1.09864300  |
| H | 15.90925200 | 6.98459900  | -0.19337400 |
| H | 16.83366700 | 6.31032900  | 1.15483800  |
| H | 17.10555800 | 5.71575000  | -0.48736900 |
| C | 18.48290300 | -2.95598600 | 2.07082700  |
| C | 19.60276100 | -3.03863000 | 1.01417100  |
| H | 17.53089700 | -2.78518500 | 1.56180500  |
| H | 18.39277100 | -3.93098100 | 2.56999200  |
| C | 19.36384600 | -4.14497200 | -0.02006800 |
| H | 19.68647100 | -2.06908100 | 0.50623400  |
| H | 20.56792000 | -3.20595500 | 1.51057100  |
| C | 20.47334000 | -4.23533600 | -1.07195400 |
| H | 19.26931900 | -5.10960900 | 0.49726900  |
| H | 18.39994300 | -3.97263200 | -0.51763100 |
| H | 20.27454600 | -5.03255800 | -1.79546800 |

|                 |              |             |             |
|-----------------|--------------|-------------|-------------|
| H               | 20.56834200  | -3.29662400 | -1.62923900 |
| H               | 21.44425300  | -4.44231000 | -0.60766700 |
| NH <sub>2</sub> |              |             |             |
| C               | 20.66927200  | -0.39474200 | 2.45528400  |
| C               | 20.30219800  | -1.58101800 | 1.89199500  |
| C               | 18.96491900  | -1.57509300 | 1.37703200  |
| C               | 18.32557500  | -0.35371200 | 1.56684700  |
| C               | 17.00252200  | 0.07010000  | 1.17755200  |
| C               | 16.55151900  | 1.35702600  | 0.97868200  |
| C               | 15.17626400  | 1.45544100  | 0.62213200  |
| C               | 14.54677200  | 0.21462100  | 0.53754200  |
| C               | 13.19931400  | -0.12049500 | 0.16418600  |
| C               | 12.71882100  | -1.33570100 | -0.28087200 |
| C               | 11.32245900  | -1.35867400 | -0.55234500 |
| C               | 10.70037500  | -0.13312200 | -0.31596500 |
| C               | 9.33496100   | 0.26910200  | -0.50946700 |
| C               | 8.83586400   | 1.55139100  | -0.62743900 |
| C               | 7.42525100   | 1.62680400  | -0.79342600 |
| C               | 6.80907600   | 0.37558300  | -0.80773300 |
| C               | 5.43125800   | 0.01912200  | -0.99996900 |
| C               | 4.91571000   | -1.20485400 | -1.37945200 |
| C               | 3.49694200   | -1.25095800 | -1.46561600 |
| C               | 2.89008800   | -0.03570900 | -1.14865700 |
| C               | 1.50528900   | 0.34384600  | -1.16314200 |
| C               | 0.97364300   | 1.61770700  | -1.21417900 |
| C               | -0.44748000  | 1.66956200  | -1.19846800 |
| C               | -1.04034900  | 0.40862300  | -1.13519100 |
| C               | -2.42525600  | 0.02945900  | -1.15086200 |
| C               | -2.96458500  | -1.20569100 | -1.45373400 |
| C               | -4.38223300  | -1.27350100 | -1.36326200 |
| C               | -4.96463300  | -0.06442000 | -0.98415000 |
| C               | -6.34687300  | 0.29561200  | -0.83351800 |
| C               | -6.90105400  | 1.56058600  | -0.83884100 |
| C               | -8.31033700  | 1.59285900  | -0.64857200 |
| C               | -8.87054900  | 0.32561500  | -0.49224300 |
| C               | -10.24171600 | -0.07249800 | -0.33222600 |
| C               | -10.79614200 | -1.31874500 | -0.54784600 |
| C               | -12.19215000 | -1.40192200 | -0.28542000 |
| C               | -12.74097700 | -0.19436700 | 0.14141400  |
| C               | -14.10277700 | 0.15432500  | 0.44568800  |
| C               | -14.67278100 | 1.41092400  | 0.46993100  |
| C               | -16.05186800 | 1.43080000  | 0.82508900  |
| C               | -16.56789600 | 0.16440900  | 1.07962000  |
| C               | -17.91255300 | -0.24638600 | 1.40366500  |
| C               | -18.49309000 | -1.48319100 | 1.21780200  |
| C               | -19.84627800 | -1.57153500 | 1.67362100  |
| C               | -20.29970500 | -0.38742800 | 2.20115800  |
| S               | 19.39738500  | 0.77578700  | 2.39658700  |

|   |              |             |             |
|---|--------------|-------------|-------------|
| S | 15.68153300  | -1.07093100 | 0.95372800  |
| S | 11.87530900  | 1.03414900  | 0.29488400  |
| S | 8.01180300   | -0.89353800 | -0.56238200 |
| S | 4.11578200   | 1.15161900  | -0.69456700 |
| S | 0.20498700   | -0.84039600 | -1.04684600 |
| S | -3.71113900  | 1.14489000  | -0.69346800 |
| S | -7.60397100  | -0.90410200 | -0.53791600 |
| S | -11.47860900 | 1.03363000  | 0.26239500  |
| S | -15.29737200 | -1.04949500 | 0.92473400  |
| S | -19.05854800 | 0.83391100  | 2.20004700  |
| H | 21.61596600  | -0.14298200 | 2.91222700  |
| H | 20.95236300  | -2.44750500 | 1.83691700  |
| H | 17.19900400  | 2.22353500  | 1.06016000  |
| H | 13.35903700  | -2.19729600 | -0.43682100 |
| H | 9.47176400   | 2.43010300  | -0.62182000 |
| H | 5.54407000   | -2.05576200 | -1.61954300 |
| H | 1.59024100   | 2.50696700  | -1.28886000 |
| H | -2.35742800  | -2.04974700 | -1.76277900 |
| H | -6.31272200  | 2.45690600  | -1.00336200 |
| H | -10.21918200 | -2.16134000 | -0.91369500 |
| H | -14.12163700 | 2.30904400  | 0.21222300  |
| H | -17.97067400 | -2.31273900 | 0.75357500  |
| H | -21.27916200 | -0.16279900 | 2.59864200  |
| N | 18.39443900  | -2.70419900 | 0.79586300  |
| H | 17.64677800  | -2.52094200 | 0.13731000  |
| H | 19.06576500  | -3.36383300 | 0.42600600  |
| N | 14.55828800  | 2.68212200  | 0.40827700  |
| H | 15.19492800  | 3.43851300  | 0.19679100  |
| H | 13.76465600  | 2.66748700  | -0.22085000 |
| N | 10.67644700  | -2.51006000 | -0.98810500 |
| H | 9.84335900   | -2.35913200 | -1.54412600 |
| H | 11.28831500  | -3.19952500 | -1.40325300 |
| N | 6.76187400   | 2.84344800  | -0.90691700 |
| H | 7.35115500   | 3.61399800  | -1.19166200 |
| H | 5.89252200   | 2.81968400  | -1.42615900 |
| N | 2.81838000   | -2.41332100 | -1.81516300 |
| H | 1.91722600   | -2.27571800 | -2.25675000 |
| H | 3.38198200   | -3.09117300 | -2.31016500 |
| N | -1.13979200  | 2.87540400  | -1.22533200 |
| H | -0.60322500  | 3.65463200  | -1.58180000 |
| H | -2.06645800  | 2.83678700  | -1.63256200 |
| N | -5.08041000  | -2.44962900 | -1.61662100 |
| H | -6.03189300  | -2.32860000 | -1.94248300 |
| H | -4.57268500  | -3.12148100 | -2.17614700 |
| N | -9.01986800  | 2.78912300  | -0.60921600 |
| H | -8.54552900  | 3.56647600  | -1.04860400 |
| H | -9.98937700  | 2.72811700  | -0.89663000 |
| N | -12.89874300 | -2.59215400 | -0.43355400 |



|                  |              |             |             |
|------------------|--------------|-------------|-------------|
| H                | -13.88650900 | -2.48576300 | -0.63221400 |
| H                | -12.46026100 | -3.25825400 | -1.05529200 |
| N                | -16.77064200 | 2.62123800  | 0.91868300  |
| H                | -16.38430900 | 3.37798100  | 0.36999200  |
| H                | -17.76978000 | 2.52927100  | 0.77618900  |
| N                | -20.57514400 | -2.76847600 | 1.61440200  |
| H                | -21.57545300 | -2.63810300 | 1.69636400  |
| H                | -20.36207800 | -3.32821100 | 0.79795100  |
| NMe <sub>2</sub> |              |             |             |
| C                | 21.33796800  | -0.03096100 | 1.02590600  |
| C                | 20.84433100  | -1.29799900 | 0.92957900  |
| C                | 19.42100800  | -1.33392100 | 0.76460900  |
| C                | 18.84267900  | -0.07558900 | 0.73843900  |
| C                | 17.45042200  | 0.28767900  | 0.59656100  |
| C                | 16.91119600  | 1.55502500  | 0.56255400  |
| C                | 15.49630400  | 1.58248400  | 0.41717500  |
| C                | 14.93396400  | 0.31812400  | 0.33887500  |
| C                | 13.54533200  | -0.04658900 | 0.20143100  |
| C                | 13.01306000  | -1.31623000 | 0.11154800  |
| C                | 11.59700300  | -1.34771200 | -0.00697900 |
| C                | 11.02250200  | -0.08579400 | -0.00857700 |
| C                | 9.62966300   | 0.27324300  | -0.10517400 |
| C                | 9.08575400   | 1.54157000  | -0.10287300 |
| C                | 7.66902800   | 1.56864600  | -0.20873600 |
| C                | 7.10460900   | 0.30480600  | -0.29407100 |
| C                | 5.71352500   | -0.05744000 | -0.39955300 |
| C                | 5.17969500   | -1.32587100 | -0.50547200 |
| C                | 3.76127100   | -1.35743200 | -0.58510700 |
| C                | 3.18532600   | -0.09617100 | -0.53840500 |
| C                | 1.78998100   | 0.26336400  | -0.56455700 |
| C                | 1.24763200   | 1.53262200  | -0.55244600 |
| C                | -0.17289200  | 1.55998600  | -0.55391200 |
| C                | -0.74333900  | 0.29616300  | -0.57125500 |
| C                | -2.13853300  | -0.06511200 | -0.57634600 |
| C                | -2.67938000  | -1.33488100 | -0.60007300 |
| C                | -4.10004700  | -1.36467300 | -0.59612600 |
| C                | -4.67082600  | -0.10027400 | -0.56661100 |
| C                | -6.06456900  | 0.26338600  | -0.52285700 |
| C                | -6.60360500  | 1.53413000  | -0.54528900 |
| C                | -8.02159500  | 1.56939700  | -0.46003600 |
| C                | -8.59321900  | 0.30786300  | -0.37234700 |
| C                | -9.98338100  | -0.05145400 | -0.24721500 |
| C                | -10.52725200 | -1.31974700 | -0.23002300 |
| C                | -11.93812100 | -1.34823300 | -0.05921900 |
| C                | -12.49977700 | -0.08542700 | 0.05364700  |
| C                | -13.88245300 | 0.27910900  | 0.24087700  |
| C                | -14.41471900 | 1.54903000  | 0.32025700  |
| C                | -15.82323300 | 1.58139300  | 0.51836200  |

|   |              |             |             |
|---|--------------|-------------|-------------|
| C | -16.39145700 | 0.31963000  | 0.59092200  |
| C | -17.77667800 | -0.04425700 | 0.79415300  |
| C | -18.30837400 | -1.31508000 | 0.80336100  |
| C | -19.71737200 | -1.36538900 | 1.06162500  |
| C | -20.23820400 | -0.10196600 | 1.23846300  |
| S | 20.07770900  | 1.16082500  | 0.91701600  |
| S | 16.17829100  | -0.92284100 | 0.44179500  |
| S | 12.25852000  | 1.15938800  | 0.13610300  |
| S | 8.35225900   | -0.93666900 | -0.24538000 |
| S | 4.42449200   | 1.14768000  | -0.40490900 |
| S | 0.50409200   | -0.94636600 | -0.58509800 |
| S | -3.42417800  | 1.14342900  | -0.55539700 |
| S | -7.35068000  | -0.93905800 | -0.40442700 |
| S | -11.25691700 | 1.15631700  | -0.05668800 |
| S | -15.16120200 | -0.92501000 | 0.40889800  |
| S | -19.03066000 | 1.14598700  | 1.11886500  |
| H | 22.36336900  | 0.28623100  | 1.15336700  |
| H | 21.46395600  | -2.18634800 | 0.97366200  |
| H | 17.51352000  | 2.45353000  | 0.64022600  |
| H | 13.62411500  | -2.21183400 | 0.13133900  |
| H | 9.68964600   | 2.43875800  | -0.02476000 |
| H | 5.79310000   | -2.21958100 | -0.52721300 |
| H | 1.85601900   | 2.43014100  | -0.54023200 |
| H | -2.06918800  | -2.23081100 | -0.61949000 |
| H | -5.99362500  | 2.42693300  | -0.62316500 |
| H | -9.92691800  | -2.21608000 | -0.33882400 |
| H | -13.80943000 | 2.44457800  | 0.23616200  |
| H | -17.69670100 | -2.19543700 | 0.64965900  |
| H | -21.26408800 | 0.17644400  | 1.42549000  |
| N | 18.62824400  | -2.51297000 | 0.63179300  |
| N | 14.69299900  | 2.76051300  | 0.34603700  |
| N | 10.80050500  | -2.52808200 | -0.11886700 |
| N | 6.86167000   | 2.74644100  | -0.23437200 |
| N | 2.96473100   | -2.53441300 | -0.71719500 |
| N | -0.97936100  | 2.73893800  | -0.54079100 |
| N | -4.90449100  | -2.54282200 | -0.63026000 |
| N | -8.82278800  | 2.74980500  | -0.47717300 |
| N | -12.74286900 | -2.52740300 | -0.01485200 |
| N | -16.61472500 | 2.76509700  | 0.62083600  |
| N | -20.43581400 | -2.56987100 | 1.16843000  |
| C | 18.85654000  | -3.23205600 | -0.62253800 |
| H | 18.10793700  | -4.02455000 | -0.72354600 |
| H | 18.74370200  | -2.54420500 | -1.46364700 |
| H | 19.85662000  | -3.69593200 | -0.68317300 |
| C | 18.67887300  | -3.39079900 | 1.80109900  |
| H | 19.66061300  | -3.87596000 | 1.94250200  |
| H | 18.44560200  | -2.81562100 | 2.70005200  |
| H | 17.92610200  | -4.17811700 | 1.69122200  |

|   |             |             |             |
|---|-------------|-------------|-------------|
| C | 10.86091400 | -3.39147100 | 1.06054400  |
| H | 11.84349800 | -3.87589500 | 1.19903000  |
| H | 10.63728400 | -2.80453100 | 1.95435300  |
| H | 10.10562100 | -4.17878400 | 0.96801200  |
| C | 11.01641700 | -3.26260100 | -1.36571200 |
| H | 10.26431000 | -4.05375500 | -1.45151600 |
| H | 10.89921500 | -2.58427400 | -2.21400700 |
| H | 12.01437400 | -3.73080500 | -1.42977900 |
| C | 6.97711900  | 3.56771300  | 0.97017800  |
| H | 6.80690800  | 2.94703600  | 1.85291900  |
| H | 7.96057300  | 4.05896000  | 1.07432300  |
| H | 6.21051700  | 4.34917000  | 0.94620000  |
| C | 7.00779700  | 3.52673200  | -1.46389400 |
| H | 6.84943200  | 2.87818100  | -2.32861700 |
| H | 6.24827900  | 4.31527300  | -1.48214900 |
| H | 7.99920600  | 4.00268700  | -1.56242900 |
| C | 14.78266500 | 3.60989700  | 1.53336400  |
| H | 14.59154900 | 3.01050000  | 2.42647000  |
| H | 15.76407700 | 4.10279600  | 1.64790900  |
| H | 14.01817800 | 4.39136000  | 1.47338100  |
| C | 14.86863600 | 3.51149000  | -0.89816200 |
| H | 14.72675000 | 2.84355600  | -1.75088100 |
| H | 14.11253300 | 4.30162300  | -0.95108800 |
| H | 15.86353100 | 3.98207200  | -0.98572900 |
| C | 3.23543400  | -3.55794400 | 0.29006100  |
| H | 4.21670800  | -4.04955300 | 0.16751100  |
| H | 3.19580900  | -3.11097900 | 1.28603800  |
| H | 2.46368000  | -4.33226100 | 0.22889400  |
| C | 2.95213800  | -3.07624700 | -2.07778100 |
| H | 2.20125500  | -3.87054900 | -2.14274700 |
| H | 2.67872400  | -2.28809000 | -2.78290700 |
| H | 3.92636000  | -3.49574100 | -2.38390300 |
| C | -0.84399200 | 3.52780800  | 0.68377000  |
| H | -1.00720700 | 2.88491500  | 1.55178800  |
| H | 0.14473600  | 4.00833900  | 0.78756300  |
| H | -1.60572700 | 4.31441400  | 0.69051000  |
| C | -0.84983400 | 3.55097400  | -1.75067600 |
| H | -1.01850200 | 2.92497500  | -2.63000100 |
| H | -1.61070600 | 4.33835500  | -1.73819600 |
| H | 0.13883600  | 4.03250200  | -1.85073000 |
| C | -4.55542200 | -3.53897200 | 0.37972000  |
| H | -3.58879100 | -4.03888100 | 0.19155300  |
| H | -4.51261400 | -3.06459700 | 1.36283000  |
| H | -5.33140200 | -4.31116900 | 0.40327200  |
| C | -5.03148300 | -3.12265200 | -1.96907500 |
| H | -5.79299700 | -3.90930800 | -1.95079400 |
| H | -5.35317700 | -2.35157900 | -2.67261800 |
| H | -4.08897600 | -3.56234000 | -2.33965000 |

|                 |              |             |             |
|-----------------|--------------|-------------|-------------|
| C               | -8.39491700  | 3.78260900  | 0.46278200  |
| H               | -8.27104500  | 3.34554500  | 1.45622700  |
| H               | -7.44811200  | 4.27464100  | 0.17770000  |
| H               | -9.16818000  | 4.55578200  | 0.52050600  |
| C               | -9.05323700  | 3.27826800  | -1.82351100 |
| H               | -9.43402600  | 2.48345000  | -2.46861900 |
| H               | -9.80698300  | 4.07111500  | -1.77601100 |
| H               | -8.14061500  | 3.69526600  | -2.28414500 |
| C               | -12.35485400 | -3.47108500 | 1.03151200  |
| H               | -11.38470300 | -3.96402200 | 0.84264700  |
| H               | -12.29507300 | -2.94962500 | 1.98958400  |
| H               | -13.11845000 | -4.25192700 | 1.11174700  |
| C               | -12.90666700 | -3.16954700 | -1.31959300 |
| H               | -13.66110700 | -3.95936500 | -1.24068400 |
| H               | -13.25666300 | -2.43326600 | -2.04676600 |
| H               | -11.97430500 | -3.62127600 | -1.70188400 |
| C               | -20.14022900 | -3.60289400 | 0.18186200  |
| H               | -20.50543500 | -3.35297600 | -0.82921900 |
| H               | -19.06544800 | -3.77968000 | 0.11904800  |
| H               | -20.61116100 | -4.53977300 | 0.49444200  |
| C               | -21.85262500 | -2.43619200 | 1.45651300  |
| H               | -22.27649100 | -3.42747500 | 1.63937100  |
| H               | -21.99129700 | -1.83549100 | 2.35999300  |
| H               | -22.42399700 | -1.96364500 | 0.63721200  |
| C               | -16.13624200 | 3.72058200  | 1.61616600  |
| H               | -15.98495500 | 3.20991300  | 2.56999500  |
| H               | -15.19104900 | 4.21797800  | 1.33393500  |
| H               | -16.89349500 | 4.49874300  | 1.75862100  |
| C               | -16.89314400 | 3.39154000  | -0.67219300 |
| H               | -17.31412600 | 2.64921000  | -1.35398800 |
| H               | -17.63139700 | 4.18872100  | -0.53571800 |
| H               | -15.99510400 | 3.82924100  | -1.14311700 |
| NO <sub>2</sub> |              |             |             |
| C               | 19.77569200  | 4.16709600  | -2.22683100 |
| C               | 19.59406800  | 4.39805400  | -0.89949700 |
| C               | 18.43911100  | 3.73236400  | -0.39475500 |
| C               | 17.73901900  | 2.96843100  | -1.32562600 |
| C               | 16.58873100  | 2.07914800  | -1.28568000 |
| C               | 16.33307100  | 1.10959600  | -2.23129000 |
| C               | 15.09506100  | 0.45594300  | -2.04838400 |
| C               | 14.36692100  | 0.88284200  | -0.93873900 |
| C               | 13.13016000  | 0.47021100  | -0.29769900 |
| C               | 12.82815100  | 0.71535200  | 1.02590700  |
| C               | 11.51485500  | 0.33990500  | 1.38091400  |
| C               | 10.76876500  | -0.22987200 | 0.34944800  |
| C               | 9.45484200   | -0.84059500 | 0.24608500  |
| C               | 9.09893700   | -1.74281000 | -0.73513200 |
| C               | 7.73247100   | -2.09362100 | -0.70648400 |

|   |              |             |             |
|---|--------------|-------------|-------------|
| C | 6.99412600   | -1.49301200 | 0.31321900  |
| C | 5.62987500   | -1.60592100 | 0.79884300  |
| C | 5.23761900   | -1.27757500 | 2.08031400  |
| C | 3.84194700   | -1.34784600 | 2.27570800  |
| C | 3.11338000   | -1.75716100 | 1.15883100  |
| C | 1.71873200   | -2.06706100 | 0.89696600  |
| C | 1.29038900   | -2.88386900 | -0.12916300 |
| C | -0.11361300  | -2.92960400 | -0.26197200 |
| C | -0.81631500  | -2.16958000 | 0.67334500  |
| C | -2.21892900  | -1.97795900 | 0.99811000  |
| C | -2.67415800  | -1.55206000 | 2.22904200  |
| C | -4.06546100  | -1.31947600 | 2.26393900  |
| C | -4.73410800  | -1.58240400 | 1.06815100  |
| C | -6.12367200  | -1.59019600 | 0.64603200  |
| C | -6.59777600  | -2.31205100 | -0.43003700 |
| C | -7.95420000  | -2.05746900 | -0.72376100 |
| C | -8.57871200  | -1.14954600 | 0.13161700  |
| C | -9.93410300  | -0.65382800 | 0.29343300  |
| C | -10.43041800 | -0.13554200 | 1.47156100  |
| C | -11.72865400 | 0.40376600  | 1.34510800  |
| C | -12.28572300 | 0.29867000  | 0.07037100  |
| C | -13.57687600 | 0.60912300  | -0.51797300 |
| C | -14.06801300 | 0.00895000  | -1.65883000 |
| C | -15.28077200 | 0.57202400  | -2.11192500 |
| C | -15.77527600 | 1.60969000  | -1.32291400 |
| C | -16.98714600 | 2.41404700  | -1.31784300 |
| C | -17.52870800 | 2.99058000  | -0.18349700 |
| C | -18.62333100 | 3.83290900  | -0.48215300 |
| C | -18.92533700 | 3.91668600  | -1.81760900 |
| S | 18.54285900  | 3.13841100  | -2.87580700 |
| S | 15.26112300  | 2.15489800  | -0.13659800 |
| S | 11.74860900  | -0.26329800 | -1.09900300 |
| S | 8.05349600   | -0.44663700 | 1.23112700  |
| S | 4.22282200   | -2.02912100 | -0.16578300 |
| S | 0.33251900   | -1.36508100 | 1.71890100  |
| S | -3.56619400  | -2.10605700 | -0.12404000 |
| S | -7.41132600  | -0.59360100 | 1.30927300  |
| S | -11.12712100 | -0.47670800 | -0.98560900 |
| S | -14.66820500 | 1.88679600  | -0.00004500 |
| S | -17.88396600 | 2.92887200  | -2.75032600 |
| H | 20.55424100  | 4.54677300  | -2.87328000 |
| H | 20.22929500  | 5.01096600  | -0.27604600 |
| H | 17.00069400  | 0.84184100  | -3.03848300 |
| H | 13.51296500  | 1.13729100  | 1.74874900  |
| H | 9.77967800   | -2.17074800 | -1.45826000 |
| H | 5.91009600   | -1.00672600 | 2.88276400  |
| H | 1.94032800   | -3.45938800 | -0.77405600 |
| H | -2.05478600  | -1.41782200 | 3.10530000  |

|    |              |             |             |
|----|--------------|-------------|-------------|
| H  | -6.01757000  | -3.02381200 | -1.00120700 |
| H  | -9.90880400  | -0.14326700 | 2.41888000  |
| H  | -13.60435900 | -0.82479900 | -2.16825500 |
| H  | -17.18208200 | 2.81570700  | 0.82599200  |
| H  | -19.73074600 | 4.48048500  | -2.26503000 |
| N  | -19.38067300 | 4.53740500  | 0.53662500  |
| O  | -20.31488300 | 5.24591300  | 0.16149000  |
| O  | -19.03149500 | 4.37689300  | 1.70634200  |
| N  | -15.91775600 | 0.02079500  | -3.28740100 |
| O  | -16.82455400 | 0.67219500  | -3.81641000 |
| O  | -15.50651100 | -1.06198500 | -3.70120100 |
| N  | -12.37266800 | 0.96505300  | 2.51135100  |
| O  | -13.39213300 | 1.64350900  | 2.34220600  |
| O  | -11.85785900 | 0.74706700  | 3.60614100  |
| N  | -8.57922900  | -2.76043500 | -1.82175400 |
| O  | -9.67307800  | -2.35029900 | -2.22643500 |
| O  | -7.97626300  | -3.71799100 | -2.30147900 |
| N  | -4.67351800  | -0.88064100 | 3.50009900  |
| O  | -5.82987100  | -0.44503700 | 3.45558500  |
| O  | -3.99733600  | -0.95056800 | 4.52385700  |
| N  | -0.69440000  | -3.75960900 | -1.29349800 |
| O  | -1.88969500  | -3.59686200 | -1.56515100 |
| O  | 0.04039700   | -4.56943500 | -1.85407500 |
| N  | 3.29857500   | -1.03946200 | 3.57963100  |
| O  | 2.07896800   | -0.85762900 | 3.67190900  |
| O  | 4.08524000   | -0.95895100 | 4.52011600  |
| N  | 7.23045200   | -3.04176700 | -1.67576400 |
| O  | 6.00511400   | -3.14415300 | -1.80693000 |
| O  | 8.05363100   | -3.68033200 | -2.32728500 |
| N  | 11.07319600  | 0.53178700  | 2.74420800  |
| O  | 9.86262900   | 0.44224800  | 2.98015500  |
| O  | 11.92741500  | 0.79019300  | 3.58874900  |
| N  | 14.71146400  | -0.58998100 | -2.96894600 |
| O  | 13.54007700  | -0.98505900 | -2.94550600 |
| O  | 15.57142400  | -1.01662900 | -3.73712600 |
| N  | 18.09952100  | 3.87633000  | 1.00117900  |
| O  | 16.97919900  | 3.50455200  | 1.37216700  |
| O  | 18.94267400  | 4.37531900  | 1.74344300  |
| OH |              |             |             |
| C  | 20.46813700  | 2.28792300  | -1.93812400 |
| C  | 20.12705500  | 2.76022700  | -0.70442600 |
| C  | 18.82905000  | 2.33147900  | -0.29679700 |
| C  | 18.18649400  | 1.53415600  | -1.23239000 |
| C  | 16.88878700  | 0.90613600  | -1.15399600 |
| C  | 16.45789200  | -0.25634200 | -1.75022400 |
| C  | 15.10843800  | -0.58245400 | -1.45110700 |
| C  | 14.47568300  | 0.32587800  | -0.61345200 |
| C  | 13.14375500  | 0.28946200  | -0.06715000 |

|   |              |             |             |
|---|--------------|-------------|-------------|
| C | 12.67684500  | 0.83183100  | 1.10930800  |
| C | 11.29644000  | 0.59191500  | 1.33719900  |
| C | 10.67199800  | -0.14133800 | 0.33670200  |
| C | 9.31298100   | -0.60868700 | 0.25727500  |
| C | 8.81515800   | -1.70530400 | -0.41106000 |
| C | 7.41343600   | -1.87201600 | -0.26457600 |
| C | 6.80271700   | -0.90390000 | 0.52189500  |
| C | 5.42510700   | -0.78836500 | 0.92286600  |
| C | 4.89988700   | -0.20244600 | 2.05323400  |
| C | 3.48502300   | -0.28444900 | 2.13069000  |
| C | 2.89147600   | -0.93571800 | 1.05726500  |
| C | 1.50438900   | -1.24412300 | 0.82734900  |
| C | 0.95984700   | -2.27302300 | 0.09125000  |
| C | -0.45936200  | -2.27973300 | 0.08713900  |
| C | -1.03680700  | -1.25286500 | 0.82230900  |
| C | -2.42737300  | -0.98223800 | 1.07871000  |
| C | -2.99878800  | -0.34672600 | 2.15864400  |
| C | -4.41389200  | -0.26290400 | 2.08522500  |
| C | -4.96053000  | -0.83370600 | 0.94347300  |
| C | -6.34202400  | -0.97571000 | 0.56352900  |
| C | -6.92363100  | -1.93537000 | -0.23471900 |
| C | -8.32502400  | -1.77137300 | -0.39100000 |
| C | -8.85026600  | -0.67911400 | 0.28631700  |
| C | -10.21839700 | -0.24226200 | 0.39402200  |
| C | -10.82475000 | 0.45663800  | 1.41365500  |
| C | -12.20352400 | 0.71002900  | 1.18739100  |
| C | -12.68540300 | 0.20895900  | -0.01378300 |
| C | -14.02634200 | 0.23173900  | -0.54168100 |
| C | -14.63387400 | -0.66203800 | -1.39389000 |
| C | -15.98161100 | -0.32997900 | -1.69823100 |
| C | -16.43538300 | 0.82660300  | -1.08407600 |
| C | -17.74966000 | 1.42586700  | -1.12481800 |
| C | -18.39771200 | 2.15669700  | -0.15763800 |
| C | -19.69908300 | 2.58871400  | -0.55452700 |
| C | -20.05293700 | 2.18459200  | -1.81551800 |
| S | 19.21889000  | 1.31376000  | -2.64031100 |
| S | 15.57886800  | 1.64385100  | -0.22979200 |
| S | 11.82828400  | -0.49697700 | -0.94359800 |
| S | 8.00353800   | 0.27231900  | 1.04883400  |
| S | 4.12937900   | -1.41319400 | -0.10115900 |
| S | 0.22597700   | -0.22413200 | 1.49278400  |
| S | -3.66987500  | -1.44492300 | -0.08725300 |
| S | -7.55273800  | 0.19368800  | 1.09618000  |
| S | -11.37186600 | -0.55130900 | -0.90640200 |
| S | -15.13342100 | 1.54835200  | -0.14535700 |
| S | -18.75672500 | 1.30169400  | -2.57119200 |
| H | 21.38611000  | 2.45662100  | -2.48326300 |
| H | 20.75765500  | 3.38418100  | -0.08366000 |

|     |              |             |             |
|-----|--------------|-------------|-------------|
| H   | 17.08819600  | -0.89596700 | -2.35539400 |
| H   | 13.29974000  | 1.35265400  | 1.82577300  |
| H   | 9.42685900   | -2.40978800 | -0.96069400 |
| H   | 5.49754000   | 0.23920100  | 2.84084000  |
| H   | 1.54313500   | -3.03945600 | -0.40368700 |
| H   | -2.44117400  | 0.01703700  | 3.01268900  |
| H   | -6.38637500  | -2.76871200 | -0.67011700 |
| H   | -10.32489600 | 0.75036900  | 2.32829800  |
| H   | -14.16023500 | -1.56142500 | -1.76736700 |
| H   | -17.98730600 | 2.36243200  | 0.82325300  |
| H   | -20.97952800 | 2.35373900  | -2.34535900 |
| O   | -20.45275000 | 3.31333500  | 0.31891600  |
| H   | -21.29979800 | 3.52949300  | -0.09217000 |
| O   | -12.92260300 | 1.36262500  | 2.13619900  |
| H   | -13.87118700 | 1.28609800  | 1.94479600  |
| O   | -5.09776000  | 0.31172800  | 3.10725300  |
| H   | -6.04464800  | 0.11370300  | 3.02790200  |
| O   | 2.85010000   | 0.22608900  | 3.21634600  |
| H   | 1.93228200   | -0.08830600 | 3.24482500  |
| O   | 10.72476700  | 1.04722600  | 2.48100700  |
| H   | 9.85549000   | 0.63435100  | 2.60726900  |
| O   | 18.35227600  | 2.70731600  | 0.91957600  |
| H   | 17.56186400  | 2.18969500  | 1.14033700  |
| O   | 14.57483300  | -1.72387000 | -1.95613300 |
| H   | 13.73699700  | -1.92625000 | -1.50993300 |
| O   | 6.80838900   | -2.93700500 | -0.84920800 |
| H   | 5.90947400   | -3.04400100 | -0.49902000 |
| O   | -1.11523400  | -3.26545900 | -0.57646500 |
| H   | -2.05243000  | -3.27144400 | -0.32401700 |
| O   | -9.02003200  | -2.67414400 | -1.12893100 |
| H   | -9.97288000  | -2.56143000 | -0.98185900 |
| O   | -16.70253300 | -1.15140500 | -2.50426800 |
| H   | -17.64079700 | -0.90434100 | -2.47110600 |
| OMe |              |             |             |
| C   | -21.20394600 | -0.04721100 | 0.00004800  |
| C   | -20.70645100 | -1.32016300 | 0.00004500  |
| C   | -19.27851500 | -1.34290700 | 0.00003600  |
| C   | -18.69411700 | -0.08275200 | 0.00003300  |
| C   | -17.29938900 | 0.27422000  | 0.00002500  |
| C   | -16.76008900 | 1.54850100  | 0.00002300  |
| C   | -15.34380200 | 1.55878800  | 0.00001500  |
| C   | -14.76603000 | 0.29335400  | 0.00001200  |
| C   | -13.37766300 | -0.06814200 | 0.00000500  |
| C   | -12.84212800 | -1.34678100 | 0.00000100  |
| C   | -11.42742000 | -1.36305000 | -0.00000500 |
| C   | -10.84160700 | -0.10044800 | -0.00000700 |
| C   | -9.45280800  | 0.25349000  | -0.00001200 |
| C   | -8.91115800  | 1.53031800  | -0.00001300 |



|   |              |             |             |
|---|--------------|-------------|-------------|
| C | -7.49691100  | 1.54048200  | -0.00001700 |
| C | -6.91544100  | 0.27563900  | -0.00002000 |
| C | -5.52848800  | -0.08304100 | -0.00002300 |
| C | -4.99070300  | -1.36183900 | -0.00002500 |
| C | -3.57659000  | -1.37655700 | -0.00002800 |
| C | -2.99050800  | -0.11387200 | -0.00002700 |
| C | -1.60269000  | 0.24057100  | -0.00002800 |
| C | -1.06123300  | 1.51789300  | -0.00002700 |
| C | 0.35288600   | 1.52874900  | -0.00002700 |
| C | 0.93587500   | 0.26472800  | -0.00002900 |
| C | 2.32279300   | -0.09327400 | -0.00002800 |
| C | 2.86141100   | -1.37173600 | -0.00003000 |
| C | 4.27566200   | -1.38586800 | -0.00002800 |
| C | 4.86168800   | -0.12346900 | -0.00002500 |
| C | 6.24956500   | 0.23184300  | -0.00002100 |
| C | 6.79070100   | 1.50899000  | -0.00001600 |
| C | 8.20524900   | 1.52038900  | -0.00001200 |
| C | 8.78884800   | 0.25726700  | -0.00001300 |
| C | 10.17655800  | -0.10144700 | -0.00000900 |
| C | 10.71500100  | -1.37915600 | -0.00001000 |
| C | 12.13025700  | -1.39335000 | -0.00000500 |
| C | 12.71581800  | -0.13199800 | 0.00000100  |
| C | 14.10587100  | 0.22437700  | 0.00000900  |
| C | 14.64651000  | 1.49989900  | 0.00001500  |
| C | 16.06371600  | 1.50944700  | 0.00002300  |
| C | 16.64353600  | 0.24843900  | 0.00002300  |
| C | 18.03760300  | -0.11710300 | 0.00003100  |
| C | 18.57494500  | -1.38711800 | 0.00003200  |
| C | 19.99969600  | -1.39967900 | 0.00004100  |
| C | 20.55719600  | -0.14574600 | 0.00004700  |
| S | -19.95055900 | 1.14605900  | 0.00004100  |
| S | -16.02490100 | -0.93415900 | 0.00001800  |
| S | -12.09471800 | 1.13435500  | 0.00000000  |
| S | -8.17408300  | -0.95456400 | -0.00001700 |
| S | -4.24529400  | 1.12076600  | -0.00002400 |
| S | -0.32243500  | -0.96668000 | -0.00002900 |
| S | 3.60618600   | 1.11086200  | -0.00002500 |
| S | 7.53095500   | -0.97450600 | -0.00002000 |
| S | 11.46076500  | 1.10195300  | -0.00000100 |
| S | 15.38701000  | -0.98102200 | 0.00001300  |
| S | 19.32625200  | 1.08770000  | 0.00004200  |
| H | -22.23977300 | 0.26055100  | 0.00005400  |
| H | -21.33176200 | -2.20313400 | 0.00004800  |
| H | -17.37036500 | 2.44219000  | 0.00002700  |
| H | -13.45698400 | -2.23713200 | 0.00000400  |
| H | -9.52258200  | 2.42295700  | -0.00001000 |
| H | -5.60524100  | -2.25232400 | -0.00002500 |
| H | -1.67343000  | 2.40997600  | -0.00002600 |

|   |              |             |             |
|---|--------------|-------------|-------------|
| H | 2.24715100   | -2.26241800 | -0.00003200 |
| H | 6.17819600   | 2.40090100  | -0.00001600 |
| H | 10.10104900  | -2.27012700 | -0.00001500 |
| H | 14.03510500  | 2.39266500  | 0.00001400  |
| H | 17.98747500  | -2.29719000 | 0.00002600  |
| H | 21.59857900  | 0.13589600  | 0.00005400  |
| O | 20.64423300  | -2.60209600 | 0.00004200  |
| O | 16.86075100  | 2.61442200  | 0.00003100  |
| O | 12.92543500  | -2.49739000 | -0.00000500 |
| O | 9.00254500   | 2.62281500  | -0.00000700 |
| O | 5.07110200   | -2.48904600 | -0.00002800 |
| O | 1.15091000   | 2.62973100  | -0.00002600 |
| O | -2.78136800  | -2.47925800 | -0.00002900 |
| O | -6.69808300  | 2.64025500  | -0.00001900 |
| O | -10.63304800 | -2.46581300 | -0.00000900 |
| O | -14.54491100 | 2.65768000  | 0.00001100  |
| O | -18.48772400 | -2.44783500 | 0.00003100  |
| C | 22.06032700  | -2.54905100 | 0.00005200  |
| H | 22.44173500  | -2.03595400 | 0.89314800  |
| H | 22.40966400  | -3.58283000 | 0.00005200  |
| H | 22.44174700  | -2.03595000 | -0.89303600 |
| C | 16.22797000  | 3.88506900  | 0.00003400  |
| H | 15.60780700  | 4.02457900  | -0.89431800 |
| H | 15.60779800  | 4.02457000  | 0.89438000  |
| H | 17.03135100  | 4.62285800  | 0.00004100  |
| C | 12.29321300  | -3.76944800 | -0.00000500 |
| H | 11.67362400  | -3.90803900 | 0.89462400  |
| H | 11.67362900  | -3.90804100 | -0.89463900 |
| H | 13.09741100  | -4.50603900 | -0.00000300 |
| C | 8.37171900   | 3.89588400  | -0.00000800 |
| H | 7.75243900   | 4.03501100  | -0.89466100 |
| H | 7.75243300   | 4.03501000  | 0.89464100  |
| H | 9.17665400   | 4.63169700  | -0.00000400 |
| C | 4.43870300   | -3.76174600 | -0.00002900 |
| H | 3.81944000   | -3.89982400 | 0.89470200  |
| H | 3.81944100   | -3.89982400 | -0.89476100 |
| H | 5.24286400   | -4.49832400 | -0.00002800 |
| C | 0.52177100   | 3.90429100  | -0.00002600 |
| H | -0.09701100  | 4.04382900  | -0.89480700 |
| H | -0.09701100  | 4.04382900  | 0.89475600  |
| H | 1.32790800   | 4.63866400  | -0.00002500 |
| C | -3.41341800  | -3.75258600 | -0.00003500 |
| H | -4.03239100  | -3.89061200 | 0.89480800  |
| H | -4.03239100  | -3.89060400 | -0.89487800 |
| H | -2.60889800  | -4.48867700 | -0.00003800 |
| C | -7.32549900  | 3.91611300  | -0.00001300 |
| H | -7.94381300  | 4.05633800  | -0.89493000 |
| H | -7.94380600  | 4.05633300  | 0.89490900  |

|    |              |             |             |
|----|--------------|-------------|-------------|
| H  | -6.51819900  | 4.64909500  | -0.00001400 |
| C  | -11.26517500 | -3.73949500 | -0.00000600 |
| H  | -11.88382900 | -3.87745800 | 0.89501500  |
| H  | -11.88383700 | -3.87745800 | -0.89502200 |
| H  | -10.46054100 | -4.47534100 | -0.00001000 |
| C  | -15.17070500 | 3.93511000  | 0.00001500  |
| H  | -15.78826500 | 4.07631800  | -0.89516600 |
| H  | -15.78825500 | 4.07631800  | 0.89520200  |
| H  | -14.36212100 | 4.66646700  | 0.00001000  |
| C  | -19.12344000 | -3.72070200 | 0.00003300  |
| H  | -19.74163700 | -3.85774100 | 0.89539500  |
| H  | -19.74164700 | -3.85773900 | -0.89532200 |
| H  | -18.32029400 | -4.45791000 | 0.00002800  |
| Ph |              |             |             |
| C  | 15.90641700  | 8.55832200  | -1.34700800 |
| C  | 16.22097800  | 8.11135500  | -0.09681300 |
| C  | 15.83477400  | 6.75166200  | 0.14865300  |
| C  | 15.20554800  | 6.18458800  | -0.95062800 |
| C  | 14.59194700  | 4.87698600  | -1.13816000 |
| C  | 14.62153200  | 4.08917600  | -2.26618000 |
| C  | 13.88285200  | 2.87089700  | -2.16728600 |
| C  | 13.25912400  | 2.74095600  | -0.93278000 |
| C  | 12.37889300  | 1.71101800  | -0.40396000 |
| C  | 12.31554300  | 1.24671000  | 0.89127700  |
| C  | 11.31080900  | 0.26091400  | 1.12728600  |
| C  | 10.57543200  | -0.01627400 | -0.01875800 |
| C  | 9.44353800   | -0.90016700 | -0.24514300 |
| C  | 9.16801400   | -1.63534200 | -1.37734200 |
| C  | 7.95211800   | -2.38030900 | -1.32829900 |
| C  | 7.27283300   | -2.18939600 | -0.13112100 |
| C  | 5.99570600   | -2.69625000 | 0.34322900  |
| C  | 5.65501400   | -3.02221000 | 1.63805100  |
| C  | 4.30471200   | -3.44785600 | 1.81458300  |
| C  | 3.59308300   | -3.42616200 | 0.62149300  |
| C  | 2.20021000   | -3.72466100 | 0.32978800  |
| C  | 1.69086100   | -4.34937100 | -0.78710500 |
| C  | 0.26839900   | -4.46223000 | -0.81507500 |
| C  | -0.32117300  | -3.88531400 | 0.30355000  |
| C  | -1.71585600  | -3.71567300 | 0.67659200  |
| C  | -2.25196300  | -3.74033600 | 1.94564500  |
| C  | -3.65508300  | -3.48829400 | 2.01004300  |
| C  | -4.19730100  | -3.24604200 | 0.75380800  |
| C  | -5.54899900  | -2.90722100 | 0.33854300  |
| C  | -6.20493600  | -3.32286600 | -0.79924700 |
| C  | -7.51685100  | -2.78693400 | -0.96485900 |
| C  | -7.85961000  | -1.92009800 | 0.06568300  |
| C  | -9.04893300  | -1.11503000 | 0.28865600  |
| C  | -9.61818100  | -0.77814800 | 1.49754600  |

|   |              |             |             |
|---|--------------|-------------|-------------|
| C | -10.75868700 | 0.07463400  | 1.40733600  |
| C | -11.05344600 | 0.41033700  | 0.09188300  |
| C | -12.07750500 | 1.27462900  | -0.47410600 |
| C | -12.77896700 | 1.08700500  | -1.64428000 |
| C | -13.69248900 | 2.13517900  | -1.97034600 |
| C | -13.66624500 | 3.15719400  | -1.03092100 |
| C | -14.37714000 | 4.42807400  | -0.97645300 |
| C | -14.89726800 | 5.05161800  | 0.13435500  |
| C | -15.44108600 | 6.35287800  | -0.11790600 |
| C | -15.31412300 | 6.69684000  | -1.44478800 |
| S | 15.09866600  | 7.33844600  | -2.27045000 |
| S | 13.58332500  | 4.13317800  | 0.08302300  |
| S | 11.13012400  | 0.95501000  | -1.36986500 |
| S | 8.14282000   | -1.07972500 | 0.91256000  |
| S | 4.60086600   | -2.86876400 | -0.70099700 |
| S | 0.89280800   | -3.20300200 | 1.37002200  |
| S | -2.96156000  | -3.32095300 | -0.48840400 |
| S | -6.54777500  | -1.77230600 | 1.22133200  |
| S | -9.90846200  | -0.32342900 | -1.01500000 |
| S | -12.50704300 | 2.81443600  | 0.23841200  |
| S | -14.54142100 | 5.46778500  | -2.38258600 |
| H | 16.11545500  | 9.52449500  | -1.78462200 |
| H | 16.75228600  | 8.70866600  | 0.63507000  |
| H | 15.21074200  | 4.34530100  | -3.13943200 |
| H | 13.01647000  | 1.56049800  | 1.65644000  |
| H | 9.85346600   | -1.69228700 | -2.21529700 |
| H | 6.37543800   | -3.01536400 | 2.44813000  |
| H | 2.32622600   | -4.77763800 | -1.55401800 |
| H | -1.66398800  | -3.99392700 | 2.82044800  |
| H | -5.78082000  | -4.04935200 | -1.48306600 |
| H | -9.26387400  | -1.18055400 | 2.43982100  |
| H | -12.68908700 | 0.18361300  | -2.23672800 |
| H | -14.87709400 | 4.59246700  | 1.11609900  |
| H | -15.68143400 | 7.58939300  | -1.93192300 |
| C | 16.14772200  | 6.06964000  | 1.42772300  |
| C | 16.74506500  | 4.79835100  | 1.45331300  |
| C | 15.89725300  | 6.71577300  | 2.64963800  |
| C | 17.06958000  | 4.18922100  | 2.66374500  |
| H | 16.96479800  | 4.29520500  | 0.51719600  |
| C | 16.22292800  | 6.10550500  | 3.86021900  |
| H | 15.42946700  | 7.69609100  | 2.64687700  |
| C | 16.80934400  | 4.83921600  | 3.87187100  |
| H | 17.53448600  | 3.20754900  | 2.66292000  |
| H | 16.01509100  | 6.61895600  | 4.79459000  |
| H | 17.06448200  | 4.36358600  | 4.81427100  |
| C | 13.87876200  | 1.87125900  | -3.26328100 |
| C | 14.16407400  | 0.51732500  | -3.02082000 |
| C | 13.63924900  | 2.27884800  | -4.58594700 |

|   |             |             |             |
|---|-------------|-------------|-------------|
| C | 14.19749100 | -0.40089800 | -4.06834300 |
| H | 14.37123500 | 0.19101000  | -2.00670300 |
| C | 13.67315900 | 1.35908200  | -5.63333900 |
| H | 13.41092300 | 3.32136200  | -4.78806800 |
| C | 13.95127000 | 0.01555200  | -5.37823400 |
| H | 14.42428100 | -1.44289400 | -3.86187400 |
| H | 13.47898100 | 1.69263000  | -6.64865700 |
| H | 13.97905200 | -0.70119300 | -6.19368000 |
| C | 11.16846400 | -0.40312800 | 2.44622700  |
| C | 11.11500300 | -1.80224200 | 2.55947500  |
| C | 11.14107100 | 0.36583400  | 3.62131200  |
| C | 11.02496100 | -2.41132600 | 3.80944500  |
| H | 11.15649300 | -2.41016200 | 1.66140200  |
| C | 11.05122000 | -0.24492300 | 4.87156500  |
| H | 11.17617300 | 1.44898800  | 3.54872200  |
| C | 10.99126300 | -1.63569100 | 4.97008200  |
| H | 10.98910300 | -3.49479500 | 3.87749800  |
| H | 11.02492200 | 0.36711000  | 5.76853500  |
| H | 10.92210500 | -2.11211800 | 5.94359600  |
| C | 7.55235700  | -3.28913100 | -2.43078200 |
| C | 7.20448600  | -4.62769800 | -2.18562800 |
| C | 7.57126500  | -2.83376600 | -3.75927500 |
| C | 6.87381500  | -5.48017900 | -3.23712000 |
| H | 7.20664000  | -4.99886800 | -1.16574100 |
| C | 7.24076100  | -3.68799200 | -4.81063000 |
| H | 7.83351100  | -1.79964700 | -3.96307100 |
| C | 6.88940000  | -5.01380300 | -4.55322800 |
| H | 6.61125800  | -6.51335200 | -3.02868800 |
| H | 7.25505200  | -3.31576600 | -5.83095400 |
| H | 6.63282200  | -5.67985900 | -5.37178800 |
| C | 3.80025400  | -3.91738600 | 3.12810900  |
| C | 3.11851500  | -5.13910700 | 3.25479000  |
| C | 4.04734100  | -3.16424000 | 4.28760100  |
| C | 2.68727900  | -5.58644600 | 4.50194200  |
| H | 2.93845500  | -5.74146600 | 2.37014200  |
| C | 3.61559300  | -3.61329800 | 5.53506700  |
| H | 4.56848300  | -2.21496100 | 4.20404800  |
| C | 2.93286500  | -4.82537800 | 5.64661200  |
| H | 2.16482400  | -6.53546200 | 4.58096200  |
| H | 3.81033300  | -3.01362300 | 6.41954100  |
| H | 2.59696600  | -5.17597300 | 6.61808500  |
| C | -0.43309400 | -5.18599100 | -1.90363700 |
| C | -1.38277100 | -6.18308500 | -1.62572400 |
| C | -0.11374400 | -4.92021600 | -3.24539100 |
| C | -2.00182400 | -6.88337600 | -2.65907400 |
| H | -1.62521100 | -6.41309800 | -0.59318700 |
| C | -0.73368400 | -5.62204600 | -4.27857400 |
| H | 0.61465300  | -4.14814600 | -3.47578900 |

|   |              |             |             |
|---|--------------|-------------|-------------|
| C | -1.68102000  | -6.60510500 | -3.98930900 |
| H | -2.73080000  | -7.65367900 | -2.42442200 |
| H | -0.47808100  | -5.39766500 | -5.31015800 |
| H | -2.16353000  | -7.15256000 | -4.79365500 |
| C | -4.40149500  | -3.56322100 | 3.28963600  |
| C | -5.58089600  | -4.31734400 | 3.40631800  |
| C | -3.90304600  | -2.91795500 | 4.43341900  |
| C | -6.24557700  | -4.41326000 | 4.62721400  |
| H | -5.96715500  | -4.83862800 | 2.53633500  |
| C | -4.56895000  | -3.01513100 | 5.65460000  |
| H | -2.99557400  | -2.32600700 | 4.35709400  |
| C | -5.74330400  | -3.76220100 | 5.75577900  |
| H | -7.15389900  | -5.00455900 | 4.69903700  |
| H | -4.17090300  | -2.50382900 | 6.52635900  |
| H | -6.26190200  | -3.83912700 | 6.70689900  |
| C | -8.38978600  | -3.20287400 | -2.09040200 |
| C | -9.69225600  | -3.67894300 | -1.86714400 |
| C | -7.90048500  | -3.18066800 | -3.40664400 |
| C | -10.48474100 | -4.10700900 | -2.93033800 |
| H | -10.07543400 | -3.72234800 | -0.85257400 |
| C | -8.69443800  | -3.60963800 | -4.46974300 |
| H | -6.89648600  | -2.81117600 | -3.59435800 |
| C | -9.98985300  | -4.07286600 | -4.23562700 |
| H | -11.48830500 | -4.47534400 | -2.73793500 |
| H | -8.30080600  | -3.57875000 | -5.48164100 |
| H | -10.60828200 | -4.40776300 | -5.06321100 |
| C | -11.53827700 | 0.46301900  | 2.60818400  |
| C | -12.93421200 | 0.31341100  | 2.65380300  |
| C | -10.87775100 | 0.94047800  | 3.75205800  |
| C | -13.64717600 | 0.64230900  | 3.80492500  |
| H | -13.45572600 | -0.07405400 | 1.78445400  |
| C | -11.59242000 | 1.26926500  | 4.90327700  |
| H | -9.79926900  | 1.06713900  | 3.72938400  |
| C | -12.97988100 | 1.12246400  | 4.93363600  |
| H | -14.72582000 | 0.51527300  | 3.82307400  |
| H | -11.06438300 | 1.64349900  | 5.77558300  |
| H | -13.53681000 | 1.37747500  | 5.83047400  |
| C | -14.58678900 | 2.05109500  | -3.15050200 |
| C | -15.96167900 | 2.32090300  | -3.04799300 |
| C | -14.07562300 | 1.64251900  | -4.39349300 |
| C | -16.79559600 | 2.19533100  | -4.15710800 |
| H | -16.37489300 | 2.61953500  | -2.09005800 |
| C | -14.91139600 | 1.51655700  | -5.50234500 |
| H | -13.01343100 | 1.43758000  | -4.49061300 |
| C | -16.27447200 | 1.79334300  | -5.38857400 |
| H | -17.85666100 | 2.40505200  | -4.05728900 |
| H | -14.49580500 | 1.20530400  | -6.45643000 |
| H | -16.92612600 | 1.69479300  | -6.25178800 |

|    |              |             |             |
|----|--------------|-------------|-------------|
| C  | -16.07280000 | 7.20596500  | 0.91081900  |
| C  | -16.00047300 | 8.60716800  | 0.83263700  |
| C  | -16.76587400 | 6.63618400  | 1.99208400  |
| C  | -16.60874100 | 9.40996700  | 1.79510200  |
| H  | -15.44134000 | 9.06678200  | 0.02304900  |
| C  | -17.36882700 | 7.43965100  | 2.95831800  |
| H  | -16.85056200 | 5.55601600  | 2.06359900  |
| C  | -17.29538000 | 8.83011300  | 2.86359400  |
| H  | -16.53618200 | 10.49097500 | 1.71679600  |
| H  | -17.90312500 | 6.97758900  | 3.78356300  |
| H  | -17.76527200 | 9.45578800  | 3.61658200  |
| SH |              |             |             |
| C  | -9.78135900  | 9.67837900  | 0.47794600  |
| C  | -10.65464600 | 9.51128800  | -0.55788500 |
| C  | -11.14314100 | 8.16909700  | -0.71861400 |
| C  | -10.59579600 | 7.32441600  | 0.23659900  |
| C  | -10.74772900 | 5.89003900  | 0.51632800  |
| C  | -11.32708300 | 5.31643300  | 1.62146300  |
| C  | -11.27258200 | 3.88548700  | 1.68223600  |
| C  | -10.59866000 | 3.36882400  | 0.58378600  |
| C  | -10.26608300 | 2.00467400  | 0.15395900  |
| C  | -10.69071600 | 1.37060100  | -0.98884500 |
| C  | -10.14994700 | 0.06274500  | -1.21354300 |
| C  | -9.26210000  | -0.28582200 | -0.20528000 |
| C  | -8.46093300  | -1.48701100 | 0.06453200  |
| C  | -8.59900400  | -2.34736400 | 1.12661500  |
| C  | -7.63038000  | -3.40029800 | 1.20560900  |
| C  | -6.71140600  | -3.30574400 | 0.16922900  |
| C  | -5.53901600  | -4.10418200 | -0.21222400 |
| C  | -5.37783000  | -4.85324400 | -1.35260100 |
| C  | -4.09625600  | -5.47456300 | -1.51318800 |
| C  | -3.25419900  | -5.15230100 | -0.45778400 |
| C  | -1.86957200  | -5.51078800 | -0.12418500 |
| C  | -1.44177100  | -6.23738500 | 0.96053600  |
| C  | -0.02168200  | -6.36710500 | 1.10205900  |
| C  | 0.64078300   | -5.68449600 | 0.09130300  |
| C  | 2.06063600   | -5.49043100 | -0.23070800 |
| C  | 2.72926400   | -5.94185100 | -1.34254900 |
| C  | 4.09986600   | -5.53737900 | -1.45157600 |
| C  | 4.46287300   | -4.72616100 | -0.38533000 |
| C  | 5.71302500   | -4.05301200 | -0.00914300 |
| C  | 6.48833500   | -4.30151700 | 1.09747900  |
| C  | 7.61550500   | -3.43475900 | 1.27525200  |
| C  | 7.66935000   | -2.47972700 | 0.26944700  |
| C  | 8.59089700   | -1.37377300 | -0.02113300 |
| C  | 9.41006800   | -1.24090800 | -1.11606600 |
| C  | 10.15037300  | -0.01622100 | -1.19506900 |
| C  | 9.84935600   | 0.81408000  | -0.12373900 |

|   |              |             |             |
|---|--------------|-------------|-------------|
| C | 10.31130800  | 2.14685300  | 0.28455100  |
| C | 10.98427800  | 2.46900100  | 1.43868200  |
| C | 11.24095300  | 3.86422800  | 1.64080400  |
| C | 10.71614300  | 4.62010100  | 0.60211700  |
| C | 10.70803500  | 6.06030300  | 0.30911500  |
| C | 11.36431900  | 6.70604200  | -0.70915100 |
| C | 11.08246800  | 8.10944600  | -0.81461600 |
| C | 10.18230400  | 8.50110900  | 0.14300800  |
| S | -9.50531300  | 8.19349300  | 1.30783400  |
| S | -10.05067600 | 4.64623300  | -0.48852100 |
| S | -9.10931100  | 0.99643900  | 0.98368900  |
| S | -7.05782800  | -1.93360000 | -0.87017400 |
| S | -4.05091700  | -4.09842100 | 0.69759800  |
| S | -0.48964800  | -4.90413500 | -1.00168600 |
| S | 3.11935400   | -4.47931200 | 0.71722700  |
| S | 6.34117400   | -2.66739100 | -0.86279700 |
| S | 8.67049000   | 0.07513200  | 0.94638500  |
| S | 9.91874500   | 3.60524900  | -0.58779900 |
| S | 9.66966700   | 7.19370700  | 1.15897700  |
| H | -9.29699700  | 10.58994600 | 0.79974100  |
| H | -10.95783700 | 10.33527300 | -1.18999400 |
| H | -11.81322900 | 5.92785100  | 2.37001800  |
| H | -11.41250200 | 1.83824700  | -1.64518900 |
| H | -9.41388500  | -2.23071300 | 1.82865700  |
| H | -6.19259900  | -4.97564900 | -2.05379700 |
| H | -2.15343100  | -6.69580000 | 1.63425900  |
| H | 2.23796000   | -6.58537900 | -2.06018900 |
| H | 6.25786300   | -5.12360500 | 1.76191900  |
| H | 9.49517100   | -2.03807300 | -1.84272200 |
| H | 11.31353100  | 1.69695200  | 2.12125700  |
| H | 12.04764500  | 6.17751800  | -1.36417500 |
| H | 9.78578400   | 9.49017600  | 0.32072000  |
| C | 11.72240700  | 9.01767000  | -1.86357700 |
| C | 13.25578400  | 9.02798200  | -1.66465800 |
| C | 11.39369900  | 8.47952400  | -3.27542100 |
| C | 11.19801200  | 10.46031100 | -1.74960100 |
| H | 13.51961600  | 9.41651400  | -0.67584700 |
| H | 13.68091500  | 8.02352800  | -1.75429000 |
| H | 13.73452100  | 9.66221900  | -2.41923300 |
| H | 10.31289900  | 8.46397700  | -3.44778700 |
| H | 11.85265000  | 9.11420600  | -4.04173600 |
| H | 11.76958700  | 7.46166200  | -3.41801300 |
| H | 11.66480400  | 11.09091900 | -2.51299700 |
| H | 10.11401600  | 10.50601300 | -1.89740300 |
| H | 11.42998200  | 10.89619900 | -0.77225100 |
| C | 12.01063300  | 4.39008500  | 2.86681000  |
| C | 13.06736600  | 5.43941600  | 2.45600800  |
| C | 11.01915300  | 5.01335800  | 3.87790000  |



|   |             |             |             |
|---|-------------|-------------|-------------|
| C | 12.75398800 | 3.23953600  | 3.58042400  |
| H | 13.78976400 | 5.01086500  | 1.75326700  |
| H | 12.62049500 | 6.31595400  | 1.98488600  |
| H | 13.61782200 | 5.77690400  | 3.34124600  |
| H | 10.25478300 | 4.28789400  | 4.17499300  |
| H | 11.55210400 | 5.33308000  | 4.78085100  |
| H | 10.51378000 | 5.88689900  | 3.46051000  |
| H | 13.34271300 | 3.64648600  | 4.40858500  |
| H | 12.06455300 | 2.50307700  | 4.00464400  |
| H | 13.44079800 | 2.71952600  | 2.90475900  |
| C | 11.14513500 | 0.26857200  | -2.33508700 |
| C | 10.49978800 | 1.22457700  | -3.36682500 |
| C | 12.45644300 | 0.88295600  | -1.79656300 |
| C | 11.51897700 | -1.03672800 | -3.07260000 |
| H | 9.56474100  | 0.80749300  | -3.75477100 |
| H | 10.27954400 | 2.20162200  | -2.93134400 |
| H | 11.17836500 | 1.37995200  | -4.21362000 |
| H | 12.94019100 | 0.20546500  | -1.08517500 |
| H | 13.15169200 | 1.05380400  | -2.62583100 |
| H | 12.29520600 | 1.83743300  | -1.29386000 |
| H | 12.28186200 | -0.82037300 | -3.82716100 |
| H | 11.92755300 | -1.78708300 | -2.38808100 |
| H | 10.66367100 | -1.47625100 | -3.59497400 |
| C | 8.60437300  | -3.60509900 | 2.44368300  |
| C | 10.06687000 | -3.45883300 | 1.96840100  |
| C | 8.30070900  | -2.55863200 | 3.54259100  |
| C | 8.46375000  | -5.00764500 | 3.07679700  |
| H | 10.30306400 | -4.20247800 | 1.20010100  |
| H | 10.27403500 | -2.47134200 | 1.55392000  |
| H | 10.74670100 | -3.61797700 | 2.81268300  |
| H | 7.26540200  | -2.64408200 | 3.88849100  |
| H | 8.95951000  | -2.71437100 | 4.40481200  |
| H | 8.45441800  | -1.53848900 | 3.18385400  |
| H | 9.22364400  | -5.13236300 | 3.85477700  |
| H | 7.48853300  | -5.15026200 | 3.55233600  |
| H | 8.60640700  | -5.80304000 | 2.33814400  |
| C | 4.99870900  | -5.98988300 | -2.61709800 |
| C | 5.13564100  | -4.84304600 | -3.64719400 |
| C | 6.39726100  | -6.41404800 | -2.11698400 |
| C | 4.37983300  | -7.20577300 | -3.34205900 |
| H | 4.15318300  | -4.52143600 | -4.00784500 |
| H | 5.64058400  | -3.97409000 | -3.21931200 |
| H | 5.71997700  | -5.17952400 | -4.51158200 |
| H | 6.32183000  | -7.23485000 | -1.39609100 |
| H | 7.00151400  | -6.76176400 | -2.96208000 |
| H | 6.93369500  | -5.59453300 | -1.63696600 |
| H | 5.06714000  | -7.55418900 | -4.11954800 |
| H | 4.20064100  | -8.03907100 | -2.65489500 |

|   |              |             |             |
|---|--------------|-------------|-------------|
| H | 3.43475800   | -6.95659300 | -3.83425500 |
| C | 0.61816300   | -7.18040100 | 2.24248000  |
| C | 1.79039800   | -8.04584800 | 1.72962400  |
| C | 1.11931100   | -6.22210300 | 3.34931800  |
| C | -0.41686400  | -8.13631900 | 2.87704600  |
| H | 1.45379400   | -8.73841100 | 0.95109300  |
| H | 2.60182200   | -7.44548400 | 1.31621100  |
| H | 2.19900700   | -8.63889200 | 2.55512300  |
| H | 0.30332300   | -5.59511200 | 3.72304000  |
| H | 1.51924600   | -6.79631300 | 4.19314200  |
| H | 1.91207400   | -5.56432300 | 2.98592500  |
| H | 0.07577000   | -8.75258800 | 3.63579700  |
| H | -1.22754100  | -7.59638300 | 3.37566200  |
| H | -0.85774700  | -8.80795300 | 2.13323400  |
| C | -3.76880700  | -6.38267100 | -2.71248400 |
| C | -2.90854200  | -5.60670400 | -3.73854500 |
| C | -3.02397300  | -7.65959100 | -2.26305500 |
| C | -5.06333800  | -6.83213300 | -3.42608600 |
| H | -3.41751500  | -4.69384000 | -4.06459800 |
| H | -1.93917700  | -5.32367300 | -3.32229100 |
| H | -2.72545600  | -6.22667400 | -4.62387300 |
| H | -3.62480900  | -8.22995400 | -1.54698600 |
| H | -2.83457600  | -8.30070400 | -3.13099100 |
| H | -2.06373300  | -7.43925100 | -1.79461300 |
| H | -4.81089500  | -7.53250400 | -4.22845100 |
| H | -5.74893500  | -7.34087200 | -2.74066000 |
| H | -5.59558900  | -5.99316800 | -3.88503500 |
| C | -7.67070200  | -4.47030700 | 2.31230300  |
| C | -7.41400300  | -5.88164700 | 1.73961400  |
| C | -6.61519500  | -4.14317900 | 3.39576200  |
| C | -9.05610000  | -4.49541700 | 2.99604200  |
| H | -8.16322000  | -6.13751000 | 0.98312200  |
| H | -6.42893700  | -5.97160500 | 1.28004900  |
| H | -7.47855300  | -6.62341700 | 2.54325400  |
| H | -6.77712400  | -3.14318200 | 3.81112800  |
| H | -6.68149100  | -4.86579900 | 4.21737400  |
| H | -5.59975900  | -4.18316700 | 2.99569100  |
| H | -9.08405200  | -5.30707700 | 3.73002000  |
| H | -9.26824700  | -3.56619100 | 3.53368500  |
| H | -9.86188800  | -4.66725700 | 2.27507000  |
| C | -10.55561900 | -0.79683300 | -2.42478900 |
| C | -9.43644500  | -0.75675500 | -3.49270500 |
| C | -10.83118200 | -2.25875500 | -2.00831800 |
| C | -11.84717100 | -0.25083400 | -3.07350100 |
| H | -9.21904700  | 0.27331300  | -3.79340300 |
| H | -8.51030200  | -1.20414500 | -3.12510200 |
| H | -9.74636300  | -1.31187900 | -4.38576800 |
| H | -11.63494900 | -2.30728500 | -1.26626300 |

|                  |              |             |             |
|------------------|--------------|-------------|-------------|
| H                | -11.14359000 | -2.83925500 | -2.88343900 |
| H                | -9.95163200  | -2.74300900 | -1.58182500 |
| H                | -12.15457600 | -0.91583100 | -3.88687500 |
| H                | -12.67110500 | -0.19775200 | -2.35452600 |
| H                | -11.70332700 | 0.74409000  | -3.50595000 |
| C                | -11.91234900 | 3.08971700  | 2.83497200  |
| C                | -12.68034900 | 1.85654800  | 2.30990200  |
| C                | -10.81755900 | 2.64368000  | 3.83347400  |
| C                | -12.92429800 | 3.96636800  | 3.60675900  |
| H                | -13.47139700 | 2.15707200  | 1.61494000  |
| H                | -12.03113100 | 1.14932200  | 1.79214500  |
| H                | -13.14934900 | 1.32946100  | 3.14819800  |
| H                | -10.26079600 | 3.50618600  | 4.21397400  |
| H                | -11.27174900 | 2.12979000  | 4.68876200  |
| H                | -10.10389200 | 1.95774300  | 3.37196000  |
| H                | -13.41856100 | 3.36064600  | 4.37289700  |
| H                | -12.43989200 | 4.80318800  | 4.11916800  |
| H                | -13.69892300 | 4.36959400  | 2.94641300  |
| C                | -12.14542600 | 7.78642600  | -1.82381700 |
| C                | -11.40061700 | 7.08647400  | -2.98563600 |
| C                | -13.25564800 | 6.85968100  | -1.28161600 |
| C                | -12.83374600 | 9.04655200  | -2.39383400 |
| H                | -10.60152300 | 7.72379800  | -3.37823500 |
| H                | -10.95431300 | 6.14178400  | -2.66687700 |
| H                | -12.09566700 | 6.87093900  | -3.80560600 |
| H                | -13.80504400 | 7.34384500  | -0.46750500 |
| H                | -13.96890800 | 6.62989300  | -2.08104200 |
| H                | -12.86079400 | 5.91563900  | -0.90411700 |
| H                | -13.59245300 | 8.74795000  | -3.12431400 |
| H                | -13.33187900 | 9.62569200  | -1.60961500 |
| H                | -12.12783600 | 9.70381400  | -2.91097000 |
| SiH <sub>3</sub> |              |             |             |
| C                | 19.39878400  | 4.99445500  | -0.95907300 |
| C                | 19.26545900  | 4.66101300  | 0.35888400  |
| C                | 18.18803000  | 3.75082800  | 0.63174100  |
| C                | 17.51022000  | 3.40736200  | -0.53079400 |
| C                | 16.37987500  | 2.51878300  | -0.74567400 |
| C                | 16.12894100  | 1.71358200  | -1.83636400 |
| C                | 14.92086800  | 0.95440200  | -1.76887400 |
| C                | 14.23409500  | 1.19589000  | -0.58396400 |
| C                | 12.99671300  | 0.63861000  | -0.07100700 |
| C                | 12.65470900  | 0.39797600  | 1.24400200  |
| C                | 11.35295500  | -0.15265600 | 1.44422700  |
| C                | 10.68530000  | -0.33277500 | 0.23693000  |
| C                | 9.37398500   | -0.88010400 | -0.05264000 |
| C                | 8.97384200   | -1.57827000 | -1.17406800 |
| C                | 7.60646500   | -1.98705700 | -1.18188800 |
| C                | 6.94761800   | -1.58216800 | -0.02503100 |

|   |              |             |             |
|---|--------------|-------------|-------------|
| C | 5.58270100   | -1.79359600 | 0.41661800  |
| C | 5.12165200   | -1.93375000 | 1.71001400  |
| C | 3.71318700   | -2.12478900 | 1.83780600  |
| C | 3.08507200   | -2.12723900 | 0.59598400  |
| C | 1.69424700   | -2.31683300 | 0.23294400  |
| C | 1.18814900   | -2.88422200 | -0.91916300 |
| C | -0.23568900  | -2.92994000 | -1.00183800 |
| C | -0.82927100  | -2.37544700 | 0.12813000  |
| C | -2.22372900  | -2.23248600 | 0.49838000  |
| C | -2.76923800  | -2.24053900 | 1.76639000  |
| C | -4.18470600  | -2.06845900 | 1.82227800  |
| C | -4.73042900  | -1.92356800 | 0.55043100  |
| C | -6.10419200  | -1.75644200 | 0.11775000  |
| C | -6.68329000  | -2.19299400 | -1.05668100 |
| C | -8.06515500  | -1.87147500 | -1.21116300 |
| C | -8.54877400  | -1.16440900 | -0.11461400 |
| C | -9.87473500  | -0.65838200 | 0.18325200  |
| C | -10.46868400 | -0.51386200 | 1.42072300  |
| C | -11.78917800 | 0.02744300  | 1.40337700  |
| C | -12.20874800 | 0.30347600  | 0.10604800  |
| C | -13.46511000 | 0.82551300  | -0.39786200 |
| C | -14.08217200 | 0.53708500  | -1.59783700 |
| C | -15.31763300 | 1.21617000  | -1.82516000 |
| C | -15.64346400 | 2.04869500  | -0.76135100 |
| C | -16.79952000 | 2.90245000  | -0.53936300 |
| C | -17.43410900 | 3.17635300  | 0.65272100  |
| C | -18.53420500 | 4.08769500  | 0.54539300  |
| C | -18.71211700 | 4.49583400  | -0.75642100 |
| S | 18.19523400  | 4.22026600  | -1.92993000 |
| S | 15.06786200  | 2.38365100  | 0.40335000  |
| S | 11.65813700  | 0.21821800  | -1.11655000 |
| S | 8.01453000   | -0.66978800 | 1.02884800  |
| S | 4.23678900   | -1.85165100 | -0.70008900 |
| S | 0.37869900   | -1.77057700 | 1.24931100  |
| S | -3.48374200  | -1.95996800 | -0.68502500 |
| S | -7.28149100  | -0.87354700 | 1.06459300  |
| S | -10.95345800 | -0.06969500 | -1.06246600 |
| S | -14.40583800 | 2.01038900  | 0.48105300  |
| S | -17.55453700 | 3.80455800  | -1.84265200 |
| H | 20.13033100  | 5.64656900  | -1.41578800 |
| H | 19.92901200  | 5.04004300  | 1.12823800  |
| H | 16.82919200  | 1.63600700  | -2.66092300 |
| H | 13.35207400  | 0.57444600  | 2.05564800  |
| H | 9.67045900   | -1.83382500 | -1.96505400 |
| H | 5.79761500   | -1.94478900 | 2.55805300  |
| H | 1.83638600   | -3.30555300 | -1.67975100 |
| H | -2.16142600  | -2.41398900 | 2.64773900  |
| H | -6.12962300  | -2.77962500 | -1.78170200 |

|    |              |             |             |
|----|--------------|-------------|-------------|
| H  | -9.97519300  | -0.83655400 | 2.33104100  |
| H  | -13.67298600 | -0.19117400 | -2.28964900 |
| H  | -17.12940700 | 2.70781100  | 1.58259500  |
| H  | -19.46355700 | 5.16909700  | -1.14714500 |
| Si | 17.90472400  | 3.09858600  | 2.37176700  |
| H  | 16.69987100  | 3.68545900  | 3.01528600  |
| H  | 17.77137600  | 1.62000200  | 2.38847300  |
| H  | 19.09205900  | 3.48980700  | 3.17670900  |
| Si | 14.49693100  | -0.28040300 | -3.12404700 |
| H  | 14.16300400  | -1.61324900 | -2.56232500 |
| H  | 13.36310700  | 0.17207800  | -3.97170000 |
| H  | 15.70165200  | -0.40002200 | -3.98606200 |
| Si | 10.78759200  | -0.64829100 | 3.16978700  |
| H  | 9.73648200   | 0.25579300  | 3.70458100  |
| H  | 10.27111900  | -2.03964800 | 3.19405300  |
| H  | 11.97836700  | -0.55108400 | 4.05349200  |
| Si | 6.94015900   | -3.04950500 | -2.58563100 |
| H  | 6.24389800   | -4.25523700 | -2.07149100 |
| H  | 6.00572900   | -2.30285500 | -3.46721900 |
| H  | 8.11237100   | -3.46806200 | -3.39739200 |
| Si | 2.95000700   | -2.45054100 | 3.52753200  |
| H  | 2.14277500   | -1.30245400 | 4.01546600  |
| H  | 2.09104100   | -3.66077900 | 3.51240900  |
| H  | 4.07852600   | -2.66100100 | 4.47118300  |
| Si | -1.07262400  | -3.78067000 | -2.45763400 |
| H  | -2.06985600  | -4.78198800 | -2.00388600 |
| H  | -1.74780300  | -2.81754300 | -3.36552200 |
| H  | 0.00014500   | -4.46826400 | -3.22215800 |
| Si | -5.08888700  | -2.17491600 | 3.46999900  |
| H  | -5.60116000  | -0.85531600 | 3.92153100  |
| H  | -6.22496600  | -3.12788900 | 3.40663900  |
| H  | -4.09900600  | -2.65644800 | 4.46823500  |
| Si | -9.02538400  | -2.49990000 | -2.70345200 |
| H  | -10.27128800 | -3.19520200 | -2.29458900 |
| H  | -9.37933100  | -1.41037100 | -3.64970200 |
| H  | -8.13631200  | -3.45933800 | -3.40871500 |
| Si | -12.77724200 | 0.17685400  | 2.99851500  |
| H  | -12.93952600 | 1.58816100  | 3.43408900  |
| H  | -14.12275100 | -0.43493300 | 2.86404900  |
| H  | -12.01025500 | -0.54820500 | 4.04462200  |
| Si | -16.34619500 | 0.84639800  | -3.35814100 |
| H  | -17.76021600 | 0.56597800  | -3.00653000 |
| H  | -16.31238700 | 1.95780100  | -4.34370100 |
| H  | -15.74822900 | -0.35678400 | -3.99339700 |
| Si | -19.62613100 | 4.66388000  | 1.95528000  |
| H  | -20.30201100 | 3.51449900  | 2.61342100  |
| H  | -18.83316900 | 5.38078900  | 2.98887700  |
| H  | -20.65473400 | 5.58428400  | 1.40610300  |

| SMe |              |             |             |
|-----|--------------|-------------|-------------|
| C   | -21.19523400 | 0.23882500  | -2.43238500 |
| C   | -20.81217400 | 1.46233800  | -1.97014500 |
| C   | -19.44516300 | 1.50663600  | -1.54817500 |
| C   | -18.78655200 | 0.29251700  | -1.69883800 |
| C   | -17.42921100 | -0.11883300 | -1.39684000 |
| C   | -16.94690800 | -1.41011300 | -1.38371700 |
| C   | -15.56296000 | -1.52476600 | -1.08620200 |
| C   | -14.95111800 | -0.29615900 | -0.86375400 |
| C   | -13.58998300 | 0.05483400  | -0.52259600 |
| C   | -13.13000100 | 1.30349100  | -0.15505300 |
| C   | -11.73679300 | 1.37086600  | 0.10500700  |
| C   | -11.09149600 | 0.15013900  | -0.06387200 |
| C   | -9.70972200  | -0.24047500 | 0.10464600  |
| C   | -9.21487200  | -1.52946500 | 0.10805500  |
| C   | -7.80820800  | -1.62560200 | 0.26392400  |
| C   | -7.18696800  | -0.38621500 | 0.38237300  |
| C   | -5.80090600  | -0.01835700 | 0.56494600  |
| C   | -5.31505000  | 1.24128400  | 0.85555600  |
| C   | -3.90220300  | 1.32550200  | 0.95180600  |
| C   | -3.26791500  | 0.10695400  | 0.73144700  |
| C   | -1.87185400  | -0.26842200 | 0.74571700  |
| C   | -1.36574500  | -1.55273100 | 0.74819800  |
| C   | 0.05046500   | -1.63340700 | 0.72489300  |
| C   | 0.66784700   | -0.38649700 | 0.69754800  |
| C   | 2.06127400   | -0.00275000 | 0.67769500  |
| C   | 2.56320100   | 1.27974400  | 0.77963500  |
| C   | 3.97723700   | 1.37179800  | 0.71766200  |
| C   | 4.59759700   | 0.13615400  | 0.56074600  |
| C   | 5.99100600   | -0.23648100 | 0.46621100  |
| C   | 6.50408300   | -1.51776000 | 0.50446900  |
| C   | 7.91365400   | -1.59828400 | 0.36640900  |
| C   | 8.51855000   | -0.35446500 | 0.21332500  |
| C   | 9.90344500   | 0.03038900  | 0.05935900  |
| C   | 10.40772900  | 1.31541500  | 0.08779300  |
| C   | 11.80942100  | 1.40877900  | -0.11059300 |
| C   | 12.41656900  | 0.17136600  | -0.29901100 |
| C   | 13.79764800  | -0.20166600 | -0.51226900 |
| C   | 14.32097300  | -1.47836500 | -0.46640400 |
| C   | 15.71145700  | -1.56054300 | -0.74104100 |
| C   | 16.28634600  | -0.32360400 | -1.00642300 |
| C   | 17.65148900  | 0.06255500  | -1.30979000 |
| C   | 18.17421000  | 1.33696100  | -1.23389300 |
| C   | 19.53691300  | 1.43243800  | -1.64765400 |
| C   | 20.04516300  | 0.21911000  | -2.03615700 |
| S   | -19.88898700 | -0.89943500 | -2.37890900 |
| S   | -16.12639700 | 1.00586100  | -1.03435000 |
| S   | -12.24721500 | -1.08288700 | -0.56211600 |

|   |              |             |             |
|---|--------------|-------------|-------------|
| S | -8.38441200  | 0.90321100  | 0.29207700  |
| S | -4.45935000  | -1.14528300 | 0.39268600  |
| S | -0.54702300  | 0.89037200  | 0.70409000  |
| S | 3.38876300   | -1.14329100 | 0.48185700  |
| S | 7.30050400   | 0.91858800  | 0.23845900  |
| S | 11.21087200  | -1.11130400 | -0.23792100 |
| S | 15.06935800  | 0.94362800  | -0.92248700 |
| S | 18.87293800  | -1.05684900 | -1.90257300 |
| H | -22.15985200 | -0.06728900 | -2.81222800 |
| H | -21.46371800 | 2.32653700  | -1.92530600 |
| H | -17.56386800 | -2.27924800 | -1.57940200 |
| H | -13.77103800 | 2.17250600  | -0.06554300 |
| H | -9.84041400  | -2.40812900 | 0.00469000  |
| H | -5.95145600  | 2.10540500  | 1.00516500  |
| H | -1.98928100  | -2.43862400 | 0.76954100  |
| H | 1.93869200   | 2.15728400  | 0.89821800  |
| H | 5.89090300   | -2.40183800 | 0.63303900  |
| H | 9.79404400   | 2.19337500  | 0.25134700  |
| H | 13.73138600  | -2.35640600 | -0.23076700 |
| H | 17.60368000  | 2.18809200  | -0.87976400 |
| H | 21.04102100  | -0.01584300 | -2.38130500 |
| S | 16.55860900  | -3.13137900 | -0.75406600 |
| S | 20.37039900  | 2.99960400  | -1.60239600 |
| S | 12.63761800  | 2.98866800  | -0.13916300 |
| S | 8.75483500   | -3.17141700 | 0.36257300  |
| S | 4.80705400   | 2.94891700  | 0.79949500  |
| S | 0.88745800   | -3.20836100 | 0.69780600  |
| S | -3.08741500  | 2.87620200  | 1.29018600  |
| S | -6.98298300  | -3.20729100 | 0.26323700  |
| S | -10.95238600 | 2.90595700  | 0.56418700  |
| S | -14.74977500 | -3.11192900 | -1.05657800 |
| S | -18.70505600 | 3.01130000  | -0.94251600 |
| C | 22.02577600  | 2.55516700  | -2.22038100 |
| H | 22.60442100  | 3.48056500  | -2.23115500 |
| H | 22.51428700  | 1.83653000  | -1.55801600 |
| H | 21.97198000  | 2.15626600  | -3.23611900 |
| C | 17.36278200  | -3.11865100 | 0.89711000  |
| H | 18.10004500  | -2.31664000 | 0.96392000  |
| H | 16.61796000  | -3.01780100 | 1.68848200  |
| H | 17.86915300  | -4.08148500 | 0.99774200  |
| C | 13.21355000  | 3.12184900  | 1.60023600  |
| H | 12.36994300  | 3.07312900  | 2.29105400  |
| H | 13.93864000  | 2.33930500  | 1.83101700  |
| H | 13.69703500  | 4.09755800  | 1.68864800  |
| C | 9.23958200   | -3.32126800 | 2.12841300  |
| H | 9.94891900   | -2.53905900 | 2.40496600  |
| H | 8.36080800   | -3.28236100 | 2.77454500  |
| H | 9.72107000   | -4.29652000 | 2.23164200  |

|            |              |             |             |
|------------|--------------|-------------|-------------|
| C          | 5.20978900   | 3.04743800  | 2.58937800  |
| H          | 4.30283400   | 2.98293100  | 3.19313300  |
| H          | 5.91201000   | 2.26178300  | 2.87426400  |
| H          | 5.67808800   | 4.02229400  | 2.74415100  |
| C          | 1.17013700   | -3.49165900 | 2.49115800  |
| H          | 1.84398200   | -2.73814700 | 2.90298800  |
| H          | 0.22412500   | -3.49251300 | 3.03556500  |
| H          | 1.63605800   | -4.47622700 | 2.57567100  |
| C          | -2.82796600  | 2.75570900  | 3.10499000  |
| H          | -3.77901400  | 2.61770700  | 3.62235400  |
| H          | -2.14220500  | 1.94176800  | 3.34748000  |
| H          | -2.38344300  | 3.70472800  | 3.41379700  |
| C          | -6.87517300  | -3.55403200 | 2.06425500  |
| H          | -6.23860500  | -2.82173200 | 2.56433100  |
| H          | -7.86897500  | -3.56391700 | 2.51530400  |
| H          | -6.42592900  | -4.54543600 | 2.15857000  |
| C          | -10.97114900 | 2.78036100  | 2.39705700  |
| H          | -11.99253800 | 2.67061400  | 2.76585200  |
| H          | -10.35368400 | 1.94667000  | 2.73645700  |
| H          | -10.55044000 | 3.71619100  | 2.77232100  |
| C          | -14.86577900 | -3.54013500 | 0.72652100  |
| H          | -14.29771900 | -2.83302500 | 1.33376200  |
| H          | -15.90761900 | -3.56710300 | 1.05068400  |
| H          | -14.42933400 | -4.53625100 | 0.83065200  |
| C          | -18.94734200 | 2.82608700  | 0.86960800  |
| H          | -20.00635800 | 2.71333800  | 1.10826200  |
| H          | -18.38018500 | 1.97571600  | 1.25256100  |
| H          | -18.57061200 | 3.74520800  | 1.32444500  |
| <b>tBu</b> |              |             |             |
| C          | -9.78135900  | 9.67837900  | 0.47794600  |
| C          | -10.65464600 | 9.51128800  | -0.55788500 |
| C          | -11.14314100 | 8.16909700  | -0.71861400 |
| C          | -10.59579600 | 7.32441600  | 0.23659900  |
| C          | -10.74772900 | 5.89003900  | 0.51632800  |
| C          | -11.32708300 | 5.31643300  | 1.62146300  |
| C          | -11.27258200 | 3.88548700  | 1.68223600  |
| C          | -10.59866000 | 3.36882400  | 0.58378600  |
| C          | -10.26608300 | 2.00467400  | 0.15395900  |
| C          | -10.69071600 | 1.37060100  | -0.98884500 |
| C          | -10.14994700 | 0.06274500  | -1.21354300 |
| C          | -9.26210000  | -0.28582200 | -0.20528000 |
| C          | -8.46093300  | -1.48701100 | 0.06453200  |
| C          | -8.59900400  | -2.34736400 | 1.12661500  |
| C          | -7.63038000  | -3.40029800 | 1.20560900  |
| C          | -6.71140600  | -3.30574400 | 0.16922900  |
| C          | -5.53901600  | -4.10418200 | -0.21222400 |
| C          | -5.37783000  | -4.85324400 | -1.35260100 |
| C          | -4.09625600  | -5.47456300 | -1.51318800 |



|   |              |             |             |
|---|--------------|-------------|-------------|
| C | -3.25419900  | -5.15230100 | -0.45778400 |
| C | -1.86957200  | -5.51078800 | -0.12418500 |
| C | -1.44177100  | -6.23738500 | 0.96053600  |
| C | -0.02168200  | -6.36710500 | 1.10205900  |
| C | 0.64078300   | -5.68449600 | 0.09130300  |
| C | 2.06063600   | -5.49043100 | -0.23070800 |
| C | 2.72926400   | -5.94185100 | -1.34254900 |
| C | 4.09986600   | -5.53737900 | -1.45157600 |
| C | 4.46287300   | -4.72616100 | -0.38533000 |
| C | 5.71302500   | -4.05301200 | -0.00914300 |
| C | 6.48833500   | -4.30151700 | 1.09747900  |
| C | 7.61550500   | -3.43475900 | 1.27525200  |
| C | 7.66935000   | -2.47972700 | 0.26944700  |
| C | 8.59089700   | -1.37377300 | -0.02113300 |
| C | 9.41006800   | -1.24090800 | -1.11606600 |
| C | 10.15037300  | -0.01622100 | -1.19506900 |
| C | 9.84935600   | 0.81408000  | -0.12373900 |
| C | 10.31130800  | 2.14685300  | 0.28455100  |
| C | 10.98427800  | 2.46900100  | 1.43868200  |
| C | 11.24095300  | 3.86422800  | 1.64080400  |
| C | 10.71614300  | 4.62010100  | 0.60211700  |
| C | 10.70803500  | 6.06030300  | 0.30911500  |
| C | 11.36431900  | 6.70604200  | -0.70915100 |
| C | 11.08246800  | 8.10944600  | -0.81461600 |
| C | 10.18230400  | 8.50110900  | 0.14300800  |
| S | -9.50531300  | 8.19349300  | 1.30783400  |
| S | -10.05067600 | 4.64623300  | -0.48852100 |
| S | -9.10931100  | 0.99643900  | 0.98368900  |
| S | -7.05782800  | -1.93360000 | -0.87017400 |
| S | -4.05091700  | -4.09842100 | 0.69759800  |
| S | -0.48964800  | -4.90413500 | -1.00168600 |
| S | 3.11935400   | -4.47931200 | 0.71722700  |
| S | 6.34117400   | -2.66739100 | -0.86279700 |
| S | 8.67049000   | 0.07513200  | 0.94638500  |
| S | 9.91874500   | 3.60524900  | -0.58779900 |
| S | 9.66966700   | 7.19370700  | 1.15897700  |
| H | -9.29699700  | 10.58994600 | 0.79974100  |
| H | -10.95783700 | 10.33527300 | -1.18999400 |
| H | -11.81322900 | 5.92785100  | 2.37001800  |
| H | -11.41250200 | 1.83824700  | -1.64518900 |
| H | -9.41388500  | -2.23071300 | 1.82865700  |
| H | -6.19259900  | -4.97564900 | -2.05379700 |
| H | -2.15343100  | -6.69580000 | 1.63425900  |
| H | 2.23796000   | -6.58537900 | -2.06018900 |
| H | 6.25786300   | -5.12360500 | 1.76191900  |
| H | 9.49517100   | -2.03807300 | -1.84272200 |
| H | 11.31353100  | 1.69695200  | 2.12125700  |
| H | 12.04764500  | 6.17751800  | -1.36417500 |

|   |             |             |             |
|---|-------------|-------------|-------------|
| H | 9.78578400  | 9.49017600  | 0.32072000  |
| C | 11.72240700 | 9.01767000  | -1.86357700 |
| C | 13.25578400 | 9.02798200  | -1.66465800 |
| C | 11.39369900 | 8.47952400  | -3.27542100 |
| C | 11.19801200 | 10.46031100 | -1.74960100 |
| H | 13.51961600 | 9.41651400  | -0.67584700 |
| H | 13.68091500 | 8.02352800  | -1.75429000 |
| H | 13.73452100 | 9.66221900  | -2.41923300 |
| H | 10.31289900 | 8.46397700  | -3.44778700 |
| H | 11.85265000 | 9.11420600  | -4.04173600 |
| H | 11.76958700 | 7.46166200  | -3.41801300 |
| H | 11.66480400 | 11.09091900 | -2.51299700 |
| H | 10.11401600 | 10.50601300 | -1.89740300 |
| H | 11.42998200 | 10.89619900 | -0.77225100 |
| C | 12.01063300 | 4.39008500  | 2.86681000  |
| C | 13.06736600 | 5.43941600  | 2.45600800  |
| C | 11.01915300 | 5.01335800  | 3.87790000  |
| C | 12.75398800 | 3.23953600  | 3.58042400  |
| H | 13.78976400 | 5.01086500  | 1.75326700  |
| H | 12.62049500 | 6.31595400  | 1.98488600  |
| H | 13.61782200 | 5.77690400  | 3.34124600  |
| H | 10.25478300 | 4.28789400  | 4.17499300  |
| H | 11.55210400 | 5.33308000  | 4.78085100  |
| H | 10.51378000 | 5.88689900  | 3.46051000  |
| H | 13.34271300 | 3.64648600  | 4.40858500  |
| H | 12.06455300 | 2.50307700  | 4.00464400  |
| H | 13.44079800 | 2.71952600  | 2.90475900  |
| C | 11.14513500 | 0.26857200  | -2.33508700 |
| C | 10.49978800 | 1.22457700  | -3.36682500 |
| C | 12.45644300 | 0.88295600  | -1.79656300 |
| C | 11.51897700 | -1.03672800 | -3.07260000 |
| H | 9.56474100  | 0.80749300  | -3.75477100 |
| H | 10.27954400 | 2.20162200  | -2.93134400 |
| H | 11.17836500 | 1.37995200  | -4.21362000 |
| H | 12.94019100 | 0.20546500  | -1.08517500 |
| H | 13.15169200 | 1.05380400  | -2.62583100 |
| H | 12.29520600 | 1.83743300  | -1.29386000 |
| H | 12.28186200 | -0.82037300 | -3.82716100 |
| H | 11.92755300 | -1.78708300 | -2.38808100 |
| H | 10.66367100 | -1.47625100 | -3.59497400 |
| C | 8.60437300  | -3.60509900 | 2.44368300  |
| C | 10.06687000 | -3.45883300 | 1.96840100  |
| C | 8.30070900  | -2.55863200 | 3.54259100  |
| C | 8.46375000  | -5.00764500 | 3.07679700  |
| H | 10.30306400 | -4.20247800 | 1.20010100  |
| H | 10.27403500 | -2.47134200 | 1.55392000  |
| H | 10.74670100 | -3.61797700 | 2.81268300  |
| H | 7.26540200  | -2.64408200 | 3.88849100  |

|   |             |             |             |
|---|-------------|-------------|-------------|
| H | 8.95951000  | -2.71437100 | 4.40481200  |
| H | 8.45441800  | -1.53848900 | 3.18385400  |
| H | 9.22364400  | -5.13236300 | 3.85477700  |
| H | 7.48853300  | -5.15026200 | 3.55233600  |
| H | 8.60640700  | -5.80304000 | 2.33814400  |
| C | 4.99870900  | -5.98988300 | -2.61709800 |
| C | 5.13564100  | -4.84304600 | -3.64719400 |
| C | 6.39726100  | -6.41404800 | -2.11698400 |
| C | 4.37983300  | -7.20577300 | -3.34205900 |
| H | 4.15318300  | -4.52143600 | -4.00784500 |
| H | 5.64058400  | -3.97409000 | -3.21931200 |
| H | 5.71997700  | -5.17952400 | -4.51158200 |
| H | 6.32183000  | -7.23485000 | -1.39609100 |
| H | 7.00151400  | -6.76176400 | -2.96208000 |
| H | 6.93369500  | -5.59453300 | -1.63696600 |
| H | 5.06714000  | -7.55418900 | -4.11954800 |
| H | 4.20064100  | -8.03907100 | -2.65489500 |
| H | 3.43475800  | -6.95659300 | -3.83425500 |
| C | 0.61816300  | -7.18040100 | 2.24248000  |
| C | 1.79039800  | -8.04584800 | 1.72962400  |
| C | 1.11931100  | -6.22210300 | 3.34931800  |
| C | -0.41686400 | -8.13631900 | 2.87704600  |
| H | 1.45379400  | -8.73841100 | 0.95109300  |
| H | 2.60182200  | -7.44548400 | 1.31621100  |
| H | 2.19900700  | -8.63889200 | 2.55512300  |
| H | 0.30332300  | -5.59511200 | 3.72304000  |
| H | 1.51924600  | -6.79631300 | 4.19314200  |
| H | 1.91207400  | -5.56432300 | 2.98592500  |
| H | 0.07577000  | -8.75258800 | 3.63579700  |
| H | -1.22754100 | -7.59638300 | 3.37566200  |
| H | -0.85774700 | -8.80795300 | 2.13323400  |
| C | -3.76880700 | -6.38267100 | -2.71248400 |
| C | -2.90854200 | -5.60670400 | -3.73854500 |
| C | -3.02397300 | -7.65959100 | -2.26305500 |
| C | -5.06333800 | -6.83213300 | -3.42608600 |
| H | -3.41751500 | -4.69384000 | -4.06459800 |
| H | -1.93917700 | -5.32367300 | -3.32229100 |
| H | -2.72545600 | -6.22667400 | -4.62387300 |
| H | -3.62480900 | -8.22995400 | -1.54698600 |
| H | -2.83457600 | -8.30070400 | -3.13099100 |
| H | -2.06373300 | -7.43925100 | -1.79461300 |
| H | -4.81089500 | -7.53250400 | -4.22845100 |
| H | -5.74893500 | -7.34087200 | -2.74066000 |
| H | -5.59558900 | -5.99316800 | -3.88503500 |
| C | -7.67070200 | -4.47030700 | 2.31230300  |
| C | -7.41400300 | -5.88164700 | 1.73961400  |
| C | -6.61519500 | -4.14317900 | 3.39576200  |
| C | -9.05610000 | -4.49541700 | 2.99604200  |

|   |              |             |             |
|---|--------------|-------------|-------------|
| H | -8.16322000  | -6.13751000 | 0.98312200  |
| H | -6.42893700  | -5.97160500 | 1.28004900  |
| H | -7.47855300  | -6.62341700 | 2.54325400  |
| H | -6.77712400  | -3.14318200 | 3.81112800  |
| H | -6.68149100  | -4.86579900 | 4.21737400  |
| H | -5.59975900  | -4.18316700 | 2.99569100  |
| H | -9.08405200  | -5.30707700 | 3.73002000  |
| H | -9.26824700  | -3.56619100 | 3.53368500  |
| H | -9.86188800  | -4.66725700 | 2.27507000  |
| C | -10.55561900 | -0.79683300 | -2.42478900 |
| C | -9.43644500  | -0.75675500 | -3.49270500 |
| C | -10.83118200 | -2.25875500 | -2.00831800 |
| C | -11.84717100 | -0.25083400 | -3.07350100 |
| H | -9.21904700  | 0.27331300  | -3.79340300 |
| H | -8.51030200  | -1.20414500 | -3.12510200 |
| H | -9.74636300  | -1.31187900 | -4.38576800 |
| H | -11.63494900 | -2.30728500 | -1.26626300 |
| H | -11.14359000 | -2.83925500 | -2.88343900 |
| H | -9.95163200  | -2.74300900 | -1.58182500 |
| H | -12.15457600 | -0.91583100 | -3.88687500 |
| H | -12.67110500 | -0.19775200 | -2.35452600 |
| H | -11.70332700 | 0.74409000  | -3.50595000 |
| C | -11.91234900 | 3.08971700  | 2.83497200  |
| C | -12.68034900 | 1.85654800  | 2.30990200  |
| C | -10.81755900 | 2.64368000  | 3.83347400  |
| C | -12.92429800 | 3.96636800  | 3.60675900  |
| H | -13.47139700 | 2.15707200  | 1.61494000  |
| H | -12.03113100 | 1.14932200  | 1.79214500  |
| H | -13.14934900 | 1.32946100  | 3.14819800  |
| H | -10.26079600 | 3.50618600  | 4.21397400  |
| H | -11.27174900 | 2.12979000  | 4.68876200  |
| H | -10.10389200 | 1.95774300  | 3.37196000  |
| H | -13.41856100 | 3.36064600  | 4.37289700  |
| H | -12.43989200 | 4.80318800  | 4.11916800  |
| H | -13.69892300 | 4.36959400  | 2.94641300  |
| C | -12.14542600 | 7.78642600  | -1.82381700 |
| C | -11.40061700 | 7.08647400  | -2.98563600 |
| C | -13.25564800 | 6.85968100  | -1.28161600 |
| C | -12.83374600 | 9.04655200  | -2.39383400 |
| H | -10.60152300 | 7.72379800  | -3.37823500 |
| H | -10.95431300 | 6.14178400  | -2.66687700 |
| H | -12.09566700 | 6.87093900  | -3.80560600 |
| H | -13.80504400 | 7.34384500  | -0.46750500 |
| H | -13.96890800 | 6.62989300  | -2.08104200 |
| H | -12.86079400 | 5.91563900  | -0.90411700 |
| H | -13.59245300 | 8.74795000  | -3.12431400 |
| H | -13.33187900 | 9.62569200  | -1.60961500 |
| H | -12.12783600 | 9.70381400  | -2.91097000 |

# SCREWS XYZ

| BF <sub>2</sub> |              |             |             |
|-----------------|--------------|-------------|-------------|
| C               | -21.19146100 | -0.13468000 | -0.36060900 |
| C               | -20.73917700 | -1.41715900 | -0.26798500 |
| C               | -19.32184500 | -1.52574300 | -0.05305100 |
| C               | -18.71411700 | -0.27343700 | 0.00598200  |
| C               | -17.32507300 | 0.12922100  | 0.19399700  |
| C               | -16.86259600 | 1.20110200  | 0.92139100  |
| C               | -15.45285700 | 1.42647500  | 0.84190800  |
| C               | -14.82969000 | 0.48755300  | 0.01892300  |
| C               | -13.43496200 | 0.29167400  | -0.35433000 |
| C               | -12.95751900 | -0.12970500 | -1.57440300 |
| C               | -11.54646400 | -0.34819200 | -1.63259700 |
| C               | -10.93661200 | -0.08426800 | -0.40500600 |
| C               | -9.54690600  | -0.14734500 | 0.02750100  |
| C               | -9.08574400  | -0.53006800 | 1.26672600  |
| C               | -7.67691400  | -0.39181300 | 1.46041100  |
| C               | -7.05151700  | 0.11925900  | 0.32179700  |
| C               | -5.65672000  | 0.41899900  | 0.02708500  |
| C               | -5.18087400  | 1.45571300  | -0.74346000 |
| C               | -3.76924700  | 1.45102200  | -0.96390900 |
| C               | -3.15695100  | 0.36442700  | -0.33696900 |
| C               | -1.76515400  | -0.05856500 | -0.25793200 |
| C               | -1.29579300  | -1.35257300 | -0.24527300 |
| C               | 0.11242100   | -1.48613100 | -0.04402300 |
| C               | 0.72823400   | -0.24234000 | 0.10527700  |
| C               | 2.11884300   | 0.13778500  | 0.31585700  |
| C               | 2.58131000   | 1.17867200  | 1.08858900  |
| C               | 3.99168600   | 1.39973200  | 1.02903000  |
| C               | 4.61658700   | 0.49071100  | 0.17346700  |
| C               | 6.01218800   | 0.30380200  | -0.19972600 |
| C               | 6.49205000   | -0.08410400 | -1.43016300 |
| C               | 7.90259600   | -0.30324000 | -1.49099400 |
| C               | 8.50981000   | -0.07487400 | -0.25484200 |
| C               | 9.89814600   | -0.15310800 | 0.17906400  |
| C               | 10.35520800  | -0.57112900 | 1.40836000  |
| C               | 11.76382200  | -0.44142300 | 1.60925200  |
| C               | 12.39326700  | 0.09996600  | 0.48697100  |
| C               | 13.78953500  | 0.40448100  | 0.20449900  |
| C               | 14.27007500  | 1.46288500  | -0.53277700 |
| C               | 15.68208800  | 1.45791700  | -0.75244200 |
| C               | 16.28812800  | 0.35044300  | -0.15877700 |
| C               | 17.68085300  | -0.07579200 | -0.09410600 |
| C               | 18.16171500  | -1.36179700 | -0.19114100 |
| C               | 19.57555500  | -1.47668500 | -0.00396500 |

|   |              |             |             |
|---|--------------|-------------|-------------|
| C | 20.14632900  | -0.24537900 | 0.25011100  |
| S | -19.89226400 | 1.00150700  | -0.21464800 |
| S | -15.98622400 | -0.65346300 | -0.61843100 |
| S | -12.10662500 | 0.44476400  | 0.77661300  |
| S | -8.20475500  | 0.39390400  | -0.95874700 |
| S | -4.32550500  | -0.60562900 | 0.52222600  |
| S | -0.43205600  | 1.05383200  | -0.02867800 |
| S | 3.46098600   | -0.62149300 | -0.51407900 |
| S | 7.33817400   | 0.42453600  | 0.93804600  |
| S | 11.24411000  | 0.41209200  | -0.78862500 |
| S | 15.11651900  | -0.64115800 | 0.66837500  |
| S | 18.99883800  | 1.03299600  | 0.25825200  |
| H | -22.20452600 | 0.21378400  | -0.50615700 |
| H | -21.38791500 | -2.28276000 | -0.33142500 |
| H | -17.52031800 | 1.82853200  | 1.51177300  |
| H | -13.60540700 | -0.28453200 | -2.42948400 |
| H | -9.74424300  | -0.90976500 | 2.03949600  |
| H | -5.83024200  | 2.22101600  | -1.15284000 |
| H | -1.94785600  | -2.20818800 | -0.37867300 |
| H | 1.92297000   | 1.78615100  | 1.69894100  |
| H | 5.84644500   | -0.21369600 | -2.29118600 |
| H | 9.69404300   | -0.97068500 | 2.16878100  |
| H | 13.62427200  | 2.24313200  | -0.91907800 |
| H | 17.52144900  | -2.20800200 | -0.41336400 |
| H | 21.19295400  | -0.03070100 | 0.42103800  |
| B | 20.38066400  | -2.78732700 | -0.08116100 |
| B | 16.33088300  | 2.53609100  | -1.64668800 |
| B | 12.37916100  | -0.79266300 | 2.98074600  |
| B | 8.54160900   | -0.82905700 | -2.79421300 |
| B | 4.61322500   | 2.59538800  | 1.78222300  |
| B | 0.74252800   | -2.88979900 | 0.08173400  |
| B | -3.13248200  | 2.51134600  | -1.88766100 |
| B | -7.05796800  | -0.70371700 | 2.83980000  |
| B | -10.90932100 | -0.90792300 | -2.92226600 |
| B | -14.82952500 | 2.65330300  | 1.54028000  |
| B | -18.67741300 | -2.90679400 | 0.18535300  |
| F | 19.78473600  | -3.94731200 | -0.33512600 |
| F | 21.69645000  | -2.80532000 | 0.10378800  |
| F | 17.60508900  | 2.52255200  | -2.01750600 |
| F | 15.58632300  | 3.53854800  | -2.10598600 |
| F | 11.60713100  | -1.32230200 | 3.92577400  |
| F | 13.65034400  | -0.58234100 | 3.29976000  |
| F | 9.81651700   | -1.18120500 | -2.90609000 |
| F | 7.78786900   | -0.96520900 | -3.88174600 |
| F | 5.88597900   | 2.95757500  | 1.67762200  |
| F | 3.84567400   | 3.33661700  | 2.57642200  |
| F | 2.01429100   | -3.10532900 | 0.39509500  |
| F | -0.01473700  | -3.96605700 | -0.11114800 |

|                 |              |             |             |
|-----------------|--------------|-------------|-------------|
| F               | -1.85531800  | 2.50832300  | -2.24946900 |
| F               | -3.88936400  | 3.48790200  | -2.38027700 |
| F               | -5.78575400  | -0.48408000 | 3.14906400  |
| F               | -7.82678200  | -1.20668100 | 3.80163200  |
| F               | -9.63349400  | -1.25966700 | -3.02767400 |
| F               | -11.66458200 | -1.07543700 | -4.00442400 |
| F               | -13.55849700 | 3.01493700  | 1.41040000  |
| F               | -15.59218300 | 3.42571700  | 2.30960700  |
| F               | -17.40565600 | -3.08329500 | 0.52540900  |
| F               | -19.41860800 | -4.00599200 | 0.06934600  |
| BH <sub>2</sub> |              |             |             |
| C               | -20.92025600 | -0.24148200 | 0.03334300  |
| C               | -20.45420500 | -0.95275100 | 1.09567400  |
| C               | -19.02741200 | -0.87506100 | 1.29308300  |
| C               | -18.43205100 | -0.07411400 | 0.30650200  |
| C               | -17.04385900 | 0.28643000  | 0.07349700  |
| C               | -16.55604900 | 1.45425700  | -0.46334100 |
| C               | -15.13796500 | 1.50247100  | -0.66605600 |
| C               | -14.53544000 | 0.30211200  | -0.24984400 |
| C               | -13.14586500 | -0.11558300 | -0.23827200 |
| C               | -12.65481800 | -1.39497600 | -0.36098100 |
| C               | -11.23585100 | -1.53412000 | -0.22637800 |
| C               | -10.63370900 | -0.28406100 | 0.00465900  |
| C               | -9.24303100  | 0.08657100  | 0.18615500  |
| C               | -8.74605600  | 1.14420300  | 0.91303200  |
| C               | -7.32793900  | 1.33212700  | 0.85059600  |
| C               | -6.73261800  | 0.35317600  | 0.03450900  |
| C               | -5.34475800  | 0.11760900  | -0.31508400 |
| C               | -4.85612600  | -0.44861400 | -1.47025600 |
| C               | -3.43865800  | -0.64539900 | -1.51692800 |
| C               | -2.83505300  | -0.19450800 | -0.32882200 |
| C               | -1.44541300  | -0.16748000 | 0.08545800  |
| C               | -0.95344100  | -0.23904800 | 1.36878600  |
| C               | 0.46539000   | -0.10142200 | 1.50142500  |
| C               | 1.06698700   | 0.07809200  | 0.24239000  |
| C               | 2.45719700   | 0.24335500  | -0.13635100 |
| C               | 2.95292900   | 0.92255400  | -1.22595600 |
| C               | 4.37073500   | 0.85285900  | -1.41198900 |
| C               | 4.96740200   | 0.08146900  | -0.39802200 |
| C               | 6.35528800   | -0.25774100 | -0.14891700 |
| C               | 6.84356400   | -1.38529900 | 0.47094600  |
| C               | 8.26125900   | -1.42473200 | 0.66675200  |
| C               | 8.86564400   | -0.26053000 | 0.15810000  |
| C               | 10.25575100  | 0.14983800  | 0.10846800  |
| C               | 10.74946100  | 1.43454800  | 0.11472800  |
| C               | 12.16824700  | 1.55796100  | -0.03164400 |
| C               | 12.76767900  | 0.29070400  | -0.14826400 |
| C               | 14.15772400  | -0.09725500 | -0.29488500 |

|   |              |             |             |
|---|--------------|-------------|-------------|
| C | 14.65325300  | -1.21502000 | -0.92653800 |
| C | 16.07096500  | -1.39972800 | -0.84340900 |
| C | 16.66514900  | -0.35546200 | -0.11371700 |
| C | 18.05529500  | -0.09621200 | 0.21824200  |
| C | 18.55240000  | 0.50588000  | 1.35128900  |
| C | 19.97702400  | 0.68022200  | 1.36760600  |
| C | 20.53344600  | 0.19477300  | 0.19140400  |
| S | -19.62173300 | 0.54041500  | -0.81574600 |
| S | -15.71233900 | -0.81807800 | 0.38243700  |
| S | -11.81329200 | 0.99987200  | 0.02774000  |
| S | -7.91675300  | -0.75758000 | -0.60090200 |
| S | -4.01111500  | 0.46501900  | 0.77659400  |
| S | -0.11314300  | 0.04960200  | -1.04104800 |
| S | 3.78472600   | -0.50357500 | 0.74172100  |
| S | 7.68979200   | 0.81371600  | -0.55166000 |
| S | 11.58630800  | -0.98800900 | -0.05363400 |
| S | 15.48463400  | 0.80853600  | 0.41991300  |
| S | 19.37722400  | -0.45834000 | -0.89284100 |
| H | -21.93784600 | -0.12696600 | -0.31378900 |
| H | -21.09820000 | -1.51966300 | 1.75840200  |
| H | -17.20114900 | 2.28784200  | -0.71831800 |
| H | -13.29874300 | -2.24717200 | -0.54869400 |
| H | -9.38486200  | 1.79655500  | 1.49829100  |
| H | -5.50074100  | -0.72922700 | -2.29603600 |
| H | -1.59661100  | -0.39114600 | 2.22865600  |
| H | 2.31343600   | 1.47774200  | -1.90345500 |
| H | 6.19856100   | -2.19588900 | 0.79205900  |
| H | 10.10773600  | 2.30196800  | 0.22418800  |
| H | 14.01421400  | -1.91411100 | -1.45485600 |
| H | 17.91615200  | 0.80294500  | 2.17787000  |
| H | 21.58260500  | 0.18607400  | -0.07473800 |
| B | 20.81122700  | 1.29922000  | 2.49259300  |
| H | 21.99700800  | 1.38550800  | 2.37587700  |
| H | 20.28755800  | 1.69907400  | 3.48909100  |
| B | 16.75902400  | -2.65275600 | -1.39391700 |
| H | 17.90704500  | -2.89218800 | -1.18890800 |
| H | 16.11151600  | -3.43089000 | -2.02873700 |
| B | 12.84890200  | 2.92452500  | -0.15388800 |
| H | 14.00059100  | 3.04398500  | -0.43038100 |
| H | 12.19079000  | 3.90846100  | 0.00839100  |
| B | 8.93445000   | -2.56269900 | 1.43976500  |
| H | 10.08444000  | -2.53693600 | 1.74631900  |
| H | 8.27171900   | -3.50021300 | 1.77065100  |
| B | 5.05208800   | 1.46331700  | -2.64027300 |
| H | 4.39679200   | 2.12467900  | -3.38915200 |
| H | 6.20154300   | 1.28185600  | -2.89128500 |
| B | 1.14290600   | -0.05136700 | 2.87401100  |
| H | 0.48146400   | -0.26146800 | 3.84661500  |



|                  |              |             |             |
|------------------|--------------|-------------|-------------|
| H                | 2.29522300   | 0.21414300  | 3.01110400  |
| B                | -2.76472300  | -1.36398100 | -2.68945600 |
| H                | -3.42605200  | -1.64822700 | -3.64314700 |
| H                | -1.61523600  | -1.67342100 | -2.67623800 |
| B                | -6.64477600  | 2.53158300  | 1.51379300  |
| H                | -7.29847800  | 3.25165000  | 2.20798300  |
| H                | -5.49515800  | 2.78916300  | 1.34228200  |
| B                | -10.55857200 | -2.90740800 | -0.23085900 |
| H                | -9.40636400  | -3.05521300 | 0.02998000  |
| H                | -11.21942400 | -3.87113400 | -0.48064700 |
| B                | -14.46157500 | 2.68989700  | -1.35573400 |
| H                | -13.31235100 | 2.68022500  | -1.66739400 |
| H                | -15.11914900 | 3.65347800  | -1.61549000 |
| B                | -18.33851500 | -1.50485100 | 2.50528700  |
| H                | -17.18831000 | -1.32111500 | 2.75457500  |
| H                | -18.98412600 | -2.18671400 | 3.24523700  |
| CBr <sub>3</sub> |              |             |             |
| C                | 21.61122200  | 0.25069600  | -0.96477300 |
| C                | 21.28003400  | 0.95445100  | 0.15440900  |
| C                | 19.89334000  | 0.85284200  | 0.50520000  |
| C                | 19.17977400  | 0.06305700  | -0.39198800 |
| C                | 17.77933900  | -0.34711600 | -0.48278700 |
| C                | 17.34158000  | -1.63434700 | -0.68202400 |
| C                | 15.93332700  | -1.76132800 | -0.87230600 |
| C                | 15.28610500  | -0.52946300 | -0.81316100 |
| C                | 13.88950300  | -0.11792100 | -0.94313500 |
| C                | 13.44281900  | 0.91602300  | -1.73111900 |
| C                | 12.05512600  | 1.21472500  | -1.59090200 |
| C                | 11.43298800  | 0.37877800  | -0.66645100 |
| C                | 10.06275100  | 0.26830500  | -0.16957400 |
| C                | 9.70986900   | 0.17267900  | 1.15564600  |
| C                | 8.32275800   | -0.06656600 | 1.38627500  |
| C                | 7.60419700   | -0.15412500 | 0.19624500  |
| C                | 6.19498200   | -0.38564300 | -0.11565000 |
| C                | 5.73271200   | -1.28255700 | -1.04932800 |
| C                | 4.32576400   | -1.23220600 | -1.27768100 |
| C                | 3.70455800   | -0.26553400 | -0.49007100 |
| C                | 2.31971000   | 0.17983000  | -0.34730000 |
| C                | 1.90987100   | 1.49209000  | -0.34776100 |
| C                | 0.52644900   | 1.68359600  | -0.05771200 |
| C                | -0.13027000  | 0.47642800  | 0.16898900  |
| C                | -1.51198600  | 0.12504400  | 0.49151700  |
| C                | -1.89228500  | -0.74492300 | 1.48549500  |
| C                | -3.28715500  | -1.04069500 | 1.51602200  |
| C                | -3.98409000  | -0.37151000 | 0.51231100  |
| C                | -5.38962900  | -0.33330700 | 0.11367600  |
| C                | -5.84395800  | -0.45733800 | -1.17802400 |
| C                | -7.24587800  | -0.25130500 | -1.33891000 |

|   |              |             |             |
|---|--------------|-------------|-------------|
| C | -7.87254200  | 0.03654800  | -0.12837900 |
| C | -9.25538600  | 0.32171600  | 0.24889700  |
| C | -9.65113100  | 1.35462300  | 1.06521000  |
| C | -11.03661300 | 1.34902500  | 1.40344600  |
| C | -11.71103600 | 0.27801100  | 0.82137200  |
| C | -13.10175900 | -0.17037600 | 0.84322900  |
| C | -13.50856800 | -1.46597800 | 1.05665500  |
| C | -14.90768400 | -1.68609500 | 0.88560600  |
| C | -15.57992900 | -0.51768200 | 0.53521500  |
| C | -16.97991900 | -0.20502500 | 0.25229300  |
| C | -17.43213300 | 0.49695500  | -0.83670000 |
| C | -18.83859100 | 0.75844500  | -0.80553600 |
| C | -19.43191400 | 0.25916000  | 0.32585300  |
| S | 20.23882100  | -0.54226500 | -1.64371900 |
| S | 16.42768200  | 0.75708400  | -0.52851500 |
| S | 12.57211000  | -0.75415900 | 0.01012200  |
| S | 8.65357200   | 0.05955100  | -1.17931400 |
| S | 4.86793200   | 0.55977700  | 0.51220800  |
| S | 0.97150000   | -0.86645800 | 0.02216700  |
| S | -2.90410200  | 0.60612000  | -0.44597600 |
| S | -6.71902200  | 0.04978300  | 1.17903700  |
| S | -10.62116700 | -0.69992700 | -0.12531500 |
| S | -14.47360700 | 0.82401000  | 0.42023400  |
| S | -18.30705800 | -0.53260400 | 1.36135200  |
| H | 22.58567000  | 0.15267900  | -1.42201000 |
| H | 21.99355600  | 1.52172700  | 0.73439100  |
| H | 18.01544900  | -2.47912100 | -0.68847600 |
| H | 14.09534400  | 1.45154600  | -2.40593400 |
| H | 10.43042600  | 0.27643900  | 1.95445400  |
| H | 6.38790100   | -1.97262000 | -1.56158700 |
| H | 2.58596000   | 2.30855700  | -0.55839700 |
| H | -1.18628200  | -1.16445400 | 2.18789200  |
| H | -5.18647100  | -0.69823600 | -2.00116200 |
| H | -8.96328800  | 2.11116300  | 1.41499800  |
| H | -12.81904700 | -2.25018000 | 1.33532200  |
| H | -16.78825300 | 0.79798300  | -1.65331300 |
| H | -20.47688300 | 0.30980100  | 0.59273200  |
| C | -19.53251000 | 1.49364300  | -1.90432000 |
| C | -15.54540100 | -3.02837400 | 1.10604100  |
| C | -11.66164600 | 2.41284000  | 2.26097000  |
| C | -7.93199500  | -0.37668500 | -2.66979400 |
| C | -3.89765400  | -1.94793200 | 2.54652300  |
| C | -0.11580500  | 3.04188300  | -0.04740900 |
| C | 3.62955900   | -2.15420200 | -2.23848600 |
| C | 7.73929200   | -0.17155600 | 2.76682100  |
| C | 11.37535600  | 2.28895300  | -2.39146600 |
| C | 15.26153600  | -3.08976500 | -1.07425100 |
| C | 19.30819900  | 1.55771900  | 1.69592900  |

|                  |              |             |             |
|------------------|--------------|-------------|-------------|
| Br               | -21.46135000 | 1.69364500  | -1.60171500 |
| Br               | -19.27907900 | 0.54657800  | -3.62827600 |
| Br               | -18.75548800 | 3.30798300  | -2.10362900 |
| Br               | -16.87652700 | -3.47708300 | -0.27542800 |
| Br               | -16.44230100 | -3.07547000 | 2.88390100  |
| Br               | -14.22982800 | -4.50371200 | 1.10638600  |
| Br               | -12.90209800 | 1.67664900  | 3.60323700  |
| Br               | -12.65842400 | 3.70776600  | 1.12438300  |
| Br               | -10.32348400 | 3.46570700  | 3.26436000  |
| Br               | -9.23036100  | 1.06961500  | -2.99610900 |
| Br               | -6.66694800  | -0.33618700 | -4.18667700 |
| Br               | -8.88877000  | -2.11920400 | -2.78180800 |
| Br               | -4.82861600  | -0.87117700 | 3.93809400  |
| Br               | -5.19060400  | -3.21673300 | 1.76978500  |
| Br               | -2.55268700  | -3.04087900 | 3.49470500  |
| Br               | -1.14158800  | 3.32309000  | -1.73042600 |
| Br               | -1.33949000  | 3.29414500  | 1.47715300  |
| Br               | 1.20415500   | 4.50783200  | 0.05486700  |
| Br               | 2.31023400   | -1.22010700 | -3.36657100 |
| Br               | 2.69381000   | -3.60006400 | -1.24019700 |
| Br               | 4.88009500   | -3.05130000 | -3.47663300 |
| Br               | 6.46665400   | -1.66688200 | 2.94178600  |
| Br               | 6.79537800   | 1.51690200  | 3.23876700  |
| Br               | 9.11363300   | -0.44942200 | 4.15683100  |
| Br               | 10.15918900  | 3.39383600  | -1.30301900 |
| Br               | 10.32642900  | 1.47464300  | -3.87551600 |
| Br               | 12.65337300  | 3.53788000  | -3.23288200 |
| Br               | 13.91099200  | -3.04863100 | -2.51061800 |
| Br               | 14.36931700  | -3.66767400 | 0.60945300  |
| Br               | 16.53359200  | -4.52377900 | -1.55185900 |
| Br               | 18.07411800  | 0.42005400  | 2.72989600  |
| Br               | 18.32039200  | 3.18432900  | 1.10843400  |
| Br               | 20.68678800  | 2.17419200  | 2.97068400  |
| CCl <sub>3</sub> |              |             |             |
| C                | 21.33381700  | -0.37916700 | -0.36542300 |
| C                | 20.95636300  | 0.92563700  | -0.48544500 |
| C                | 19.56084200  | 1.13830300  | -0.23977400 |
| C                | 18.88755200  | -0.04229200 | 0.04966300  |
| C                | 17.48963000  | -0.35840700 | 0.34750100  |
| C                | 17.03858500  | -1.05489300 | 1.44195300  |
| C                | 15.64086800  | -1.34049300 | 1.42256800  |
| C                | 15.01633700  | -0.84066000 | 0.28605600  |
| C                | 13.62880800  | -0.84071400 | -0.18044200 |
| C                | 13.19269500  | -1.28678000 | -1.40416100 |
| C                | 11.80868600  | -1.05034400 | -1.65673500 |
| C                | 11.18050000  | -0.41175400 | -0.59382200 |
| C                | 9.80298700   | 0.02095600  | -0.35222600 |
| C                | 9.41306600   | 1.28601100  | 0.01469600  |

|   |              |             |             |
|---|--------------|-------------|-------------|
| C | 8.02423400   | 1.40851500  | 0.31640000  |
| C | 7.34509500   | 0.20452900  | 0.17024500  |
| C | 5.94371600   | -0.18578600 | 0.33357400  |
| C | 5.48531800   | -1.21795800 | 1.11551700  |
| C | 4.08629400   | -1.46923100 | 0.99611200  |
| C | 3.46929500   | -0.60117400 | 0.10243300  |
| C | 2.08563800   | -0.43237400 | -0.34418000 |
| C | 1.66430600   | -0.39910900 | -1.65150100 |
| C | 0.28240500   | -0.08618800 | -1.81624000 |
| C | -0.36008400  | 0.11844200  | -0.60050400 |
| C | -1.74091000  | 0.43284800  | -0.23051600 |
| C | -2.13412800  | 1.46270900  | 0.58956100  |
| C | -3.52560600  | 1.46697100  | 0.90228700  |
| C | -4.20473600  | 0.41436800  | 0.29899000  |
| C | -5.60730200  | -0.00329400 | 0.28585500  |
| C | -6.06935800  | -1.26406500 | 0.57762000  |
| C | -7.46724800  | -1.44360600 | 0.35874100  |
| C | -8.08083200  | -0.28596600 | -0.10663100 |
| C | -9.46165500  | 0.05472400  | -0.45188200 |
| C | -9.87168900  | 0.63458900  | -1.62827000 |
| C | -11.25107200 | 0.99561600  | -1.65702700 |
| C | -11.90462000 | 0.67596700  | -0.47193100 |
| C | -13.28650200 | 0.81920300  | -0.01197800 |
| C | -13.67765100 | 1.39960000  | 1.17048600  |
| C | -15.07260000 | 1.28794600  | 1.44730600  |
| C | -15.75640800 | 0.61095600  | 0.44438700  |
| C | -17.16481100 | 0.26608800  | 0.24203400  |
| C | -17.66366300 | -0.99057100 | 0.01071000  |
| C | -19.06902100 | -1.00358200 | -0.25572300 |
| C | -19.61438600 | 0.25416400  | -0.23774100 |
| S | 19.99650400  | -1.39278300 | 0.02934700  |
| S | 16.17069100  | -0.04343000 | -0.74999400 |
| S | 12.31396500  | -0.09954900 | 0.69382200  |
| S | 8.43657700   | -1.06270700 | -0.32292500 |
| S | 4.63124800   | 0.50135700  | -0.58692200 |
| S | 0.75770900   | -0.06442300 | 0.72529300  |
| S | -3.10895300  | -0.57148500 | -0.63315500 |
| S | -6.91661600  | 1.00064700  | -0.28028800 |
| S | -10.79935000 | -0.05365300 | 0.66257100  |
| S | -14.66206100 | 0.10807300  | -0.81612700 |
| S | -18.43939500 | 1.46730900  | 0.09995900  |
| H | 22.32468000  | -0.79540800 | -0.48049600 |
| H | 21.64620600  | 1.72147300  | -0.72675600 |
| H | 17.69638500  | -1.35109200 | 2.24662600  |
| H | 13.85101800  | -1.77936700 | -2.10561500 |
| H | 10.10808300  | 2.11237000  | 0.06118600  |
| H | 6.13818200   | -1.78052600 | 1.76764900  |
| H | 2.33211800   | -0.60037500 | -2.47712200 |

|    |              |             |             |
|----|--------------|-------------|-------------|
| H  | -1.43896300  | 2.20454900  | 0.95615500  |
| H  | -5.41935600  | -2.04444000 | 0.94715100  |
| H  | -9.19730400  | 0.79497500  | -2.45743400 |
| H  | -12.97901300 | 1.90065800  | 1.82554200  |
| H  | -17.05111600 | -1.88258700 | 0.05031000  |
| H  | -20.64560500 | 0.53024000  | -0.39849800 |
| C  | -19.82236600 | -2.27953100 | -0.50700800 |
| C  | -15.69796700 | 1.89021900  | 2.68637500  |
| C  | -11.89575700 | 1.62655000  | -2.87187200 |
| C  | -8.16779400  | -2.75376000 | 0.64553400  |
| C  | -4.15455100  | 2.53466600  | 1.77084300  |
| C  | -0.37524400  | -0.03000000 | -3.17787100 |
| C  | 3.38874800   | -2.54661400 | 1.79741600  |
| C  | 7.39763700   | 2.72856300  | 0.70967700  |
| C  | 11.13442700  | -1.49662800 | -2.93564500 |
| C  | 14.95248300  | -2.07477600 | 2.55223300  |
| C  | 18.92619400  | 2.50837700  | -0.32952700 |
| Cl | -19.70105200 | -3.37010300 | 0.94165900  |
| Cl | -21.56704400 | -1.99095300 | -0.84963000 |
| Cl | -19.10330900 | -3.15766300 | -1.92596700 |
| Cl | -16.46341300 | 3.49453100  | 2.28041400  |
| Cl | -14.46228800 | 2.19705200  | 3.97472900  |
| Cl | -16.95378200 | 0.81685100  | 3.41162200  |
| Cl | -13.00854400 | 2.97716600  | -2.42583400 |
| Cl | -12.83882600 | 0.37367700  | -3.80038700 |
| Cl | -10.66230400 | 2.31433600  | -4.00408900 |
| Cl | -9.04065800  | -2.65700700 | 2.24274100  |
| Cl | -9.35942800  | -3.18379200 | -0.64119000 |
| Cl | -6.99658100  | -4.12868700 | 0.75834200  |
| Cl | -5.34817500  | 1.84559500  | 2.93846000  |
| Cl | -5.00040800  | 3.76783700  | 0.72904400  |
| Cl | -2.91531000  | 3.41924600  | 2.74838200  |
| Cl | -1.28975700  | -1.57526000 | -3.49109500 |
| Cl | -1.51849500  | 1.35987000  | -3.32652600 |
| Cl | 0.84400600   | 0.14972300  | -4.50286600 |
| Cl | 2.18680300   | -3.46163600 | 0.80787700  |
| Cl | 2.52899400   | -1.80425600 | 3.22296900  |
| Cl | 4.56160100   | -3.75943400 | 2.45212500  |
| Cl | 6.56078200   | 3.47178400  | -0.72899200 |
| Cl | 8.63944600   | 3.91426900  | 1.28054200  |
| Cl | 6.19699500   | 2.54374500  | 2.04605100  |
| Cl | 9.98255100   | -0.25847600 | -3.56884000 |
| Cl | 10.22375800  | -3.04956300 | -2.64898800 |
| Cl | 12.33692400  | -1.81469900 | -4.25013900 |
| Cl | 13.73340600  | -3.26459600 | 1.95157500  |
| Cl | 14.11477900  | -0.88524200 | 3.65017300  |
| Cl | 16.13294100  | -3.00072400 | 3.56481300  |
| Cl | 17.72515800  | 2.79832100  | 0.98815300  |

|                 |              |             |             |
|-----------------|--------------|-------------|-------------|
| Cl              | 18.08480100  | 2.69985000  | -1.93688000 |
| Cl              | 20.15985000  | 3.82759200  | -0.21120200 |
| CF <sub>3</sub> |              |             |             |
| C               | -21.40156000 | 0.31523300  | 0.36654700  |
| C               | -20.91469000 | 1.59062300  | 0.38371400  |
| C               | -19.49963800 | 1.64575300  | 0.21506600  |
| C               | -18.91164200 | 0.40007700  | 0.07190400  |
| C               | -17.52913600 | -0.00689600 | -0.13833100 |
| C               | -17.09655400 | -1.05563300 | -0.91994600 |
| C               | -15.69559500 | -1.26987900 | -0.87026700 |
| C               | -15.03084600 | -0.37746200 | -0.04327900 |
| C               | -13.62545300 | -0.23186700 | 0.30332500  |
| C               | -13.12672100 | 0.17449100  | 1.52256500  |
| C               | -11.71630700 | 0.31059200  | 1.55075000  |
| C               | -11.10913800 | 0.00540900  | 0.34148500  |
| C               | -9.71743200  | 0.02086700  | -0.08140400 |
| C               | -9.25526700  | 0.33534400  | -1.34195500 |
| C               | -7.85329600  | 0.19423800  | -1.49229700 |
| C               | -7.21573400  | -0.23203400 | -0.33674400 |
| C               | -5.81836400  | -0.50646000 | -0.03994700 |
| C               | -5.34424500  | -1.47547500 | 0.81857700  |
| C               | -3.93693300  | -1.45730000 | 0.98491800  |
| C               | -3.30803100  | -0.46527800 | 0.24735000  |
| C               | -1.91098700  | -0.07769500 | 0.12819300  |
| C               | -1.43719000  | 1.20586900  | -0.04138400 |
| C               | -0.03176800  | 1.28267400  | -0.20616000 |
| C               | 0.59596400   | 0.04676300  | -0.16257500 |
| C               | 1.99314600   | -0.33829900 | -0.28967300 |
| C               | 2.47104400   | -1.48778100 | -0.88190500 |
| C               | 3.87727000   | -1.63962000 | -0.78923100 |
| C               | 4.50064200   | -0.59804400 | -0.11851000 |
| C               | 5.89550600   | -0.34711300 | 0.21016500  |
| C               | 6.36274600   | 0.26449300  | 1.35371500  |
| C               | 7.76663100   | 0.45799200  | 1.36951100  |
| C               | 8.39975600   | -0.00883100 | 0.22710100  |
| C               | 9.79577900   | -0.00381200 | -0.18188500 |
| C               | 10.26485700  | 0.14685000  | -1.46954300 |
| C               | 11.67314000  | 0.03601400  | -1.58462100 |
| C               | 12.30745000  | -0.20219500 | -0.37471600 |
| C               | 13.70955000  | -0.38515700 | -0.03126700 |
| C               | 14.20690000  | -1.23045800 | 0.93685500  |
| C               | 15.61070000  | -1.13697800 | 1.11443600  |
| C               | 16.21083000  | -0.21054400 | 0.27628000  |
| C               | 17.59650500  | 0.21270000  | 0.12595700  |
| C               | 18.03381900  | 1.49287300  | -0.13123000 |
| C               | 19.44471500  | 1.57949200  | -0.29431400 |
| C               | 20.07301100  | 0.37001300  | -0.16421800 |
| S               | -20.13772500 | -0.84639300 | 0.16341400  |

|   |              |             |             |
|---|--------------|-------------|-------------|
| S | -16.16893800 | 0.73974000  | 0.67061500  |
| S | -12.31427600 | -0.46303500 | -0.83346500 |
| S | -8.38093000  | -0.45153400 | 0.94591200  |
| S | -4.48754700  | 0.44274200  | -0.66658100 |
| S | -0.58231000  | -1.21706500 | 0.09285400  |
| S | 3.31780600   | 0.58175100  | 0.39072800  |
| S | 7.22862300   | -0.70315100 | -0.86738800 |
| S | 11.13233200  | -0.28029500 | 0.91474700  |
| S | 15.01228700  | 0.54029200  | -0.74680400 |
| S | 18.95549100  | -0.90171000 | 0.15339800  |
| H | -22.42819600 | -0.00937900 | 0.46048400  |
| H | -21.53107600 | 2.47267600  | 0.49582700  |
| H | -17.76348800 | -1.65915500 | -1.52173600 |
| H | -13.75313100 | 0.36861400  | 2.38350100  |
| H | -9.90196400  | 0.66637900  | -2.14419600 |
| H | -5.98618300  | -2.18882600 | 1.31906700  |
| H | -2.07777800  | 2.07826000  | -0.04312300 |
| H | 1.83312800   | -2.20758600 | -1.37827700 |
| H | 5.71826600   | 0.56682900  | 2.16893800  |
| H | 9.61875700   | 0.33830000  | -2.31655800 |
| H | 13.58525400  | -1.90769900 | 1.50813000  |
| H | 17.36945200  | 2.34730400  | -0.18001000 |
| H | 21.13228400  | 0.16842800  | -0.23162300 |
| C | 20.15730000  | 2.86817300  | -0.55747200 |
| C | 16.33225400  | -1.97447200 | 2.12943900  |
| C | 12.36666100  | 0.16134500  | -2.90966500 |
| C | 8.45404300   | 1.12467900  | 2.52525400  |
| C | 4.57905400   | -2.83446300 | -1.36554600 |
| C | 0.66355900   | 2.59618400  | -0.41626100 |
| C | -3.24095900  | -2.42560600 | 1.89642200  |
| C | -7.17105700  | 0.47855900  | -2.79859100 |
| C | -10.99615800 | 0.75924600  | 2.78877500  |
| C | -15.04260900 | -2.37555000 | -1.64654600 |
| C | -18.76049700 | 2.95059900  | 0.17682100  |
| F | 21.48218500  | 2.68052900  | -0.72908800 |
| F | 19.68115800  | 3.47666900  | -1.66729400 |
| F | 19.99699400  | 3.74259600  | 0.46169200  |
| F | 17.15319400  | -1.23988300 | 2.90857500  |
| F | 17.09750400  | -2.93038100 | 1.54391200  |
| F | 15.46161100  | -2.61033900 | 2.94104700  |
| F | 13.08120600  | 1.31212100  | -2.99823100 |
| F | 13.22988800  | -0.85180100 | -3.13174300 |
| F | 11.47856800  | 0.17010100  | -3.92481600 |
| F | 9.26477500   | 2.12728500  | 2.12679900  |
| F | 9.22314100   | 0.25321600  | 3.22679300  |
| F | 7.55855900   | 1.64376200  | 3.38979900  |
| F | 5.41038900   | -3.41629400 | -0.47587100 |
| F | 5.33094600   | -2.50451200 | -2.44668400 |

|     |              |             |             |
|-----|--------------|-------------|-------------|
| F   | 3.69562000   | -3.76946500 | -1.77031700 |
| F   | 1.49818300   | 2.56806200  | -1.47642000 |
| F   | 1.40976500   | 2.95010600  | 0.66136300  |
| F   | -0.22507000  | 3.58910400  | -0.62313500 |
| F   | -2.40769900  | -1.80550000 | 2.75810000  |
| F   | -2.49237100  | -3.32196300 | 1.20424200  |
| F   | -4.12869800  | -3.13250300 | 2.62481400  |
| F   | -6.40362900  | 1.59691300  | -2.73448300 |
| F   | -8.06972900  | 0.67351900  | -3.78472400 |
| F   | -6.35911000  | -0.52986300 | -3.17979400 |
| F   | -11.86442900 | 1.15834700  | 3.74008300  |
| F   | -10.15608000 | 1.78745100  | 2.54639000  |
| F   | -10.24909600 | -0.23858200 | 3.32734600  |
| F   | -14.23107400 | -3.13069100 | -0.87626200 |
| F   | -14.28245400 | -1.89727900 | -2.66495800 |
| F   | -15.96300700 | -3.19560600 | -2.19391200 |
| F   | -17.99016800 | 3.12724200  | 1.28171900  |
| F   | -17.93697200 | 3.04321500  | -0.88900800 |
| F   | -19.61437700 | 3.99341400  | 0.12260400  |
| CHO |              |             |             |
| C   | -21.01272500 | 0.12221700  | -0.31460600 |
| C   | -20.54627700 | 1.40074200  | -0.28787500 |
| C   | -19.12935400 | 1.47850100  | -0.09543600 |
| C   | -18.52977300 | 0.22741600  | 0.01459400  |
| C   | -17.13802800 | -0.15716300 | 0.20105000  |
| C   | -16.64824600 | -1.19449000 | 0.95492500  |
| C   | -15.23565100 | -1.36333200 | 0.86706300  |
| C   | -14.62800600 | -0.43194000 | 0.02896800  |
| C   | -13.23257300 | -0.22397200 | -0.32450500 |
| C   | -12.72892700 | 0.17828300  | -1.53723900 |
| C   | -11.31749700 | 0.37164700  | -1.54720700 |
| C   | -10.72414600 | 0.10945700  | -0.31487300 |
| C   | -9.33437600  | 0.15501600  | 0.11080900  |
| C   | -8.84841800  | 0.53765800  | 1.33706300  |
| C   | -7.43747100  | 0.39715400  | 1.47444300  |
| C   | -6.82666100  | -0.10252300 | 0.32681500  |
| C   | -5.43162400  | -0.37773000 | 0.02275200  |
| C   | -4.93208600  | -1.39330700 | -0.75542100 |
| C   | -3.51935100  | -1.35120900 | -0.93223300 |
| C   | -2.92071900  | -0.28038300 | -0.27282000 |
| C   | -1.52879100  | 0.12610000  | -0.16686500 |
| C   | -1.03605600  | 1.40685100  | -0.10804300 |
| C   | 0.37449700   | 1.48060800  | 0.07539600  |
| C   | 0.97833400   | 0.22814400  | 0.15655500  |
| C   | 2.37090100   | -0.15843600 | 0.31550500  |
| C   | 2.86349400   | -1.23867800 | 1.00608400  |
| C   | 4.27563300   | -1.39766000 | 0.90903700  |
| C   | 4.88073300   | -0.41563800 | 0.12823500  |



|   |              |             |             |
|---|--------------|-------------|-------------|
| C | 6.27415000   | -0.18495400 | -0.21663000 |
| C | 6.76932000   | 0.30880500  | -1.39886800 |
| C | 8.18112500   | 0.49650900  | -1.40609000 |
| C | 8.78340300   | 0.13647900  | -0.20300900 |
| C | 10.17649100  | 0.14421900  | 0.21329600  |
| C | 10.67305400  | 0.42480300  | 1.46269800  |
| C | 12.08456200  | 0.27053100  | 1.57654500  |
| C | 12.68467300  | -0.13566800 | 0.38717000  |
| C | 14.07623300  | -0.39091200 | 0.05123700  |
| C | 14.56532300  | -1.34631700 | -0.80550800 |
| C | 15.97689400  | -1.29401800 | -0.99098900 |
| C | 16.58380800  | -0.27774800 | -0.25848800 |
| C | 17.98029800  | 0.11302100  | -0.13586800 |
| C | 18.49054300  | 1.38511500  | -0.04283800 |
| C | 19.90780800  | 1.41629500  | 0.12730500  |
| C | 20.46273000  | 0.15672500  | 0.17057200  |
| S | -19.73078200 | -1.03458500 | -0.12785200 |
| S | -15.82355200 | 0.64543600  | -0.64953900 |
| S | -11.93155700 | -0.37357300 | 0.85108800  |
| S | -8.01713400  | -0.39725900 | -0.91695700 |
| S | -4.12495000  | 0.66981500  | 0.56288200  |
| S | -0.21833200  | -1.03548900 | 0.00588600  |
| S | 3.68333500   | 0.70022400  | -0.48214600 |
| S | 7.58395700   | -0.43275800 | 0.93210700  |
| S | 11.48390000  | -0.32432700 | -0.86720400 |
| S | 15.39141200  | 0.60949000  | 0.65753400  |
| S | 19.27509200  | -1.07726800 | 0.01437000  |
| H | -22.03144700 | -0.22028400 | -0.43297900 |
| H | -21.16112600 | 2.28693800  | -0.38068800 |
| H | -17.26283500 | -1.83946800 | 1.57085300  |
| H | -13.33171300 | 0.33848600  | -2.42291800 |
| H | -9.46333200  | 0.91901500  | 2.14328400  |
| H | -5.53794900  | -2.17125800 | -1.20410900 |
| H | -1.64519800  | 2.29855200  | -0.19437700 |
| H | 2.25305500   | -1.92266000 | 1.58331200  |
| H | 6.16085200   | 0.54010500  | -2.26484100 |
| H | 10.06600100  | 0.74064300  | 2.30258900  |
| H | 13.95295900  | -2.08665100 | -1.30609500 |
| H | 17.89365300  | 2.28626800  | -0.11519800 |
| H | 21.50759500  | -0.10225100 | 0.28238400  |
| C | 20.69410100  | 2.65849500  | 0.23429900  |
| O | 20.20431300  | 3.77045300  | 0.19142800  |
| H | 21.78809000  | 2.51280500  | 0.35962800  |
| C | 16.65113100  | -2.20119000 | -1.94144300 |
| O | 16.06596900  | -3.09591800 | -2.52424100 |
| H | 17.72721800  | -2.01394300 | -2.11860000 |
| C | 12.76337300  | 0.45771400  | 2.87476400  |
| O | 12.18105600  | 0.84704100  | 3.87065000  |

|      |              |             |             |
|------|--------------|-------------|-------------|
| H    | 13.83975800  | 0.20316100  | 2.90787800  |
| C    | 8.85787300   | 1.09457000  | -2.57486400 |
| O    | 8.27297100   | 1.35402400  | -3.61068800 |
| H    | 9.93471200   | 1.32040700  | -2.45736200 |
| C    | 4.94938400   | -2.55639600 | 1.52936200  |
| O    | 4.36188500   | -3.35990900 | 2.23053800  |
| H    | 6.02665600   | -2.67631100 | 1.30680300  |
| C    | 1.04827600   | 2.78490500  | 0.23763500  |
| O    | 0.46323200   | 3.84598700  | 0.11846700  |
| H    | 2.12321200   | 2.75409000  | 0.49852600  |
| C    | -2.83806100  | -2.32674800 | -1.80707000 |
| O    | -3.41950600  | -3.26183200 | -2.32671400 |
| H    | -1.76043700  | -2.15441500 | -1.99023000 |
| C    | -6.76948500  | 0.69197100  | 2.75804000  |
| O    | -7.35951700  | 1.16151300  | 3.71403400  |
| H    | -5.69315600  | 0.44246000  | 2.82072300  |
| C    | -10.63098300 | 0.87850900  | -2.75215000 |
| O    | -11.20356600 | 1.05138700  | -3.81282200 |
| H    | -9.55656700  | 1.11934300  | -2.64041000 |
| C    | -14.56079500 | -2.48167300 | 1.55377100  |
| O    | -15.14377000 | -3.24565000 | 2.30211800  |
| H    | -13.48305000 | -2.61137800 | 1.33717900  |
| C    | -18.44900700 | 2.77722700  | 0.05541300  |
| O    | -19.01962300 | 3.84547700  | -0.07948200 |
| H    | -17.37505500 | 2.73883800  | 0.32283200  |
| COOH |              |             |             |
| C    | -21.30264300 | 0.20884100  | -0.24722100 |
| C    | -20.93211300 | -1.06887000 | 0.03334700  |
| C    | -19.51401100 | -1.23200800 | 0.17068900  |
| C    | -18.80335300 | -0.04127500 | 0.00572700  |
| C    | -17.39923900 | 0.32981900  | 0.10002100  |
| C    | -16.94425300 | 1.61620300  | 0.29521700  |
| C    | -15.53261000 | 1.76504900  | 0.25205700  |
| C    | -14.86976300 | 0.56007400  | -0.00437600 |
| C    | -13.47610300 | 0.19431900  | -0.19553800 |
| C    | -13.05478600 | -0.96494400 | -0.81406200 |
| C    | -11.65027000 | -1.16837900 | -0.81156800 |
| C    | -10.95662200 | -0.14577800 | -0.15482600 |
| C    | -9.55593100  | 0.08653900  | 0.15571900  |
| C    | -9.10922800  | 0.94556700  | 1.13885100  |
| C    | -7.69974100  | 1.09902000  | 1.20408900  |
| C    | -7.02838500  | 0.35223500  | 0.22934000  |
| C    | -5.63251000  | 0.20874400  | -0.14925700 |
| C    | -5.20382300  | -0.26558900 | -1.37201200 |
| C    | -3.79803500  | -0.41609400 | -1.49625800 |
| C    | -3.11113300  | -0.06726200 | -0.32785300 |
| C    | -1.71274500  | -0.09279400 | 0.06711300  |
| C    | -1.27415100  | -0.07536300 | 1.37543400  |

|   |              |             |             |
|---|--------------|-------------|-------------|
| C | 0.13462400   | -0.00917400 | 1.53382700  |
| C | 0.81434600   | 0.04652400  | 0.31181500  |
| C | 2.21354300   | 0.17195700  | -0.06070700 |
| C | 2.65388500   | 0.59890800  | -1.29671600 |
| C | 4.06059200   | 0.55247700  | -1.47986700 |
| C | 4.73623600   | 0.05547800  | -0.35945300 |
| C | 6.13012400   | -0.23260000 | -0.06585100 |
| C | 6.55425100   | -1.06832100 | 0.94693100  |
| C | 7.96146200   | -1.13452600 | 1.11920300  |
| C | 8.65549000   | -0.31079800 | 0.22544800  |
| C | 10.05942600  | 0.00899400  | 0.02842600  |
| C | 10.51594000  | 1.12193500  | -0.64749700 |
| C | 11.92452500  | 1.18848800  | -0.80930000 |
| C | 12.58529800  | 0.08430000  | -0.25904900 |
| C | 13.97508300  | -0.33785200 | -0.20606400 |
| C | 14.38527000  | -1.63221700 | 0.03975400  |
| C | 15.79056200  | -1.80510500 | 0.14608500  |
| C | 16.49435800  | -0.60574000 | -0.00146700 |
| C | 17.90137500  | -0.24201900 | 0.07874100  |
| C | 18.36499400  | 1.03016300  | 0.36001700  |
| C | 19.77741600  | 1.15912600  | 0.26786800  |
| C | 20.38469200  | -0.02415500 | -0.08926100 |
| S | -19.92846300 | 1.25657200  | -0.36124200 |
| S | -16.02830200 | -0.74990400 | -0.10858600 |
| S | -12.07644700 | 1.08908900  | 0.38183900  |
| S | -8.17605100  | -0.58948600 | -0.69952000 |
| S | -4.23878600  | 0.51727100  | 0.87794500  |
| S | -0.32528700  | -0.06347600 | -1.01331700 |
| S | 3.59716100   | -0.26999600 | 0.93058100  |
| S | 7.52991500   | 0.47220400  | -0.86433300 |
| S | 11.43045900  | -0.97770200 | 0.51902000  |
| S | 15.38636900  | 0.70256500  | -0.34952600 |
| S | 19.26450700  | -1.30520800 | -0.28546800 |
| H | -22.29701600 | 0.60249400  | -0.40393900 |
| H | -21.62504900 | -1.89215800 | 0.14258300  |
| H | -17.59974700 | 2.45693400  | 0.47971100  |
| H | -13.73104700 | -1.66910000 | -1.28005500 |
| H | -9.77067000  | 1.46142800  | 1.82206700  |
| H | -5.87594200  | -0.49820700 | -2.18714200 |
| H | -1.94138900  | -0.11970100 | 2.22583500  |
| H | 1.98977900   | 0.95517500  | -2.07281500 |
| H | 5.87755400   | -1.64459700 | 1.56361100  |
| H | 9.86240000   | 1.89838200  | -1.02205600 |
| H | 13.70006300  | -2.46391300 | 0.13591900  |
| H | 17.71697700  | 1.85112400  | 0.63872000  |
| H | 21.44756700  | -0.18810400 | -0.20224700 |
| C | 20.56085000  | 2.38180200  | 0.52813400  |
| O | 21.76978200  | 2.46995100  | 0.44352800  |

|            |              |             |             |
|------------|--------------|-------------|-------------|
| C          | 16.38552700  | -3.12819100 | 0.39032000  |
| O          | 17.56772300  | -3.41316200 | 0.32209500  |
| C          | 12.56499400  | 2.32224100  | -1.49207300 |
| O          | 13.76079500  | 2.54898000  | -1.54859500 |
| C          | 8.56766800   | -1.99634700 | 2.14474400  |
| O          | 9.75467300   | -2.23846300 | 2.27479000  |
| C          | 4.68442400   | 0.99469400  | -2.73579700 |
| O          | 5.87740100   | 1.13882600  | -2.93742000 |
| C          | 0.75687000   | -0.00347100 | 2.86624400  |
| O          | 1.94683900   | -0.10530400 | 3.10737300  |
| C          | -3.18583000  | -0.89148600 | -2.74590500 |
| O          | -1.99554300  | -0.90735500 | -3.00584700 |
| C          | -7.06861000  | 1.96550300  | 2.21075500  |
| O          | -5.87632000  | 2.04466900  | 2.44879900  |
| C          | -11.04549900 | -2.34875600 | -1.44706600 |
| O          | -9.85659700  | -2.53682100 | -1.63528700 |
| C          | -14.89339600 | 3.07248700  | 0.46121100  |
| O          | -13.70112200 | 3.27857900  | 0.60265500  |
| C          | -18.91768800 | -2.54268900 | 0.46672700  |
| O          | -17.73165700 | -2.82027100 | 0.43806900  |
| O          | 19.77668500  | 3.43305700  | 0.88093700  |
| H          | 20.38345500  | 4.17791900  | 1.02549400  |
| O          | 15.45155800  | -4.06250900 | 0.70433700  |
| H          | 15.94149100  | -4.89315100 | 0.82147000  |
| O          | 11.66269800  | 3.14935800  | -2.07830800 |
| H          | 12.18394200  | 3.86496700  | -2.47826700 |
| O          | 7.64249600   | -2.54058400 | 2.97509000  |
| H          | 8.14109200   | -3.09981600 | 3.59349900  |
| O          | 3.76957500   | 1.25565800  | -3.70330200 |
| H          | 4.27975200   | 1.55510500  | -4.47391900 |
| O          | -0.15626800  | 0.11943400  | 3.86219900  |
| H          | 0.35161100   | 0.09263300  | 4.68994100  |
| O          | -4.10882800  | -1.32442700 | -3.64110000 |
| H          | -3.60658300  | -1.59444200 | -4.42766500 |
| O          | -7.97592700  | 2.70264500  | 2.89926800  |
| H          | -7.46271100  | 3.21859100  | 3.54289700  |
| O          | -11.97425000 | -3.25702300 | -1.83844400 |
| H          | -11.47688500 | -3.97901200 | -2.25705400 |
| O          | -15.79361300 | 4.08779100  | 0.49730700  |
| H          | -15.27497300 | 4.89332100  | 0.65879500  |
| O          | -19.85284600 | -3.47508700 | 0.77961000  |
| H          | -19.36104200 | -4.29841600 | 0.93548900  |
| <i>iPr</i> |              |             |             |
| C          | -21.15198600 | -0.02791400 | -0.36674800 |
| C          | -20.71303700 | -1.29206600 | -0.09779200 |
| C          | -19.29837800 | -1.38637500 | 0.11576400  |
| C          | -18.67708500 | -0.15545400 | -0.00594600 |
| C          | -17.27893800 | 0.23634500  | 0.13046300  |

|   |              |             |             |
|---|--------------|-------------|-------------|
| C | -16.78275900 | 1.36741600  | 0.73729500  |
| C | -15.36871300 | 1.53731800  | 0.64270500  |
| C | -14.76910300 | 0.50278900  | -0.05655000 |
| C | -13.37482200 | 0.24635100  | -0.39218000 |
| C | -12.88045900 | -0.26501800 | -1.57116100 |
| C | -11.47145300 | -0.48931900 | -1.59314500 |
| C | -10.87280000 | -0.13720900 | -0.39438300 |
| C | -9.48209900  | -0.17474300 | 0.03770500  |
| C | -9.00386300  | -0.51850200 | 1.28244600  |
| C | -7.59424500  | -0.37777500 | 1.45257200  |
| C | -6.97814800  | 0.08604300  | 0.30141700  |
| C | -5.58137000  | 0.36999300  | 0.00147100  |
| C | -5.08557500  | 1.40797200  | -0.75559100 |
| C | -3.67328300  | 1.39363600  | -0.95705300 |
| C | -3.07265600  | 0.31176300  | -0.33306500 |
| C | -1.67924000  | -0.10317900 | -0.24873600 |
| C | -1.18957800  | -1.39023700 | -0.26809100 |
| C | 0.21921600   | -1.50852300 | -0.07657300 |
| C | 0.82394300   | -0.27314800 | 0.09228700  |
| C | 2.21525400   | 0.10201900  | 0.30268500  |
| C | 2.69275300   | 1.11357300  | 1.10606600  |
| C | 4.10346500   | 1.31862800  | 1.05316700  |
| C | 4.72270700   | 0.43422800  | 0.18406800  |
| C | 6.12111000   | 0.25568200  | -0.18031200 |
| C | 6.62306900   | -0.08407600 | -1.41718200 |
| C | 8.03488400   | -0.28203300 | -1.46785600 |
| C | 8.62999400   | -0.08371600 | -0.23228600 |
| C | 10.02069900  | -0.15718400 | 0.19370500  |
| C | 10.50129400  | -0.63530700 | 1.39244400  |
| C | 11.90940900  | -0.50331600 | 1.57982500  |
| C | 12.52304900  | 0.09218900  | 0.48949200  |
| C | 13.91782900  | 0.41722800  | 0.22425200  |
| C | 14.40609200  | 1.53018900  | -0.42310200 |
| C | 15.81919400  | 1.54678600  | -0.62205700 |
| C | 16.42694100  | 0.41345800  | -0.10845700 |
| C | 17.82587800  | 0.00429200  | -0.06396800 |
| C | 18.33693400  | -1.25635600 | -0.27574000 |
| C | 19.75179400  | -1.36398200 | -0.08692900 |
| C | 20.30069400  | -0.16204600 | 0.27705400  |
| S | -19.84543800 | 1.10497600  | -0.38814400 |
| S | -15.96639200 | -0.66721600 | -0.59714800 |
| S | -12.06505100 | 0.46136400  | 0.75191600  |
| S | -8.15469400  | 0.34958100  | -0.97913400 |
| S | -4.26784200  | -0.68117500 | 0.49175000  |
| S | -0.36326400  | 1.02287500  | 0.01813900  |
| S | 3.54582200   | -0.63805100 | -0.56479800 |
| S | 7.42984000   | 0.33851600  | 0.98252400  |
| S | 11.34498100  | 0.48915600  | -0.75515000 |

|   |              |             |             |
|---|--------------|-------------|-------------|
| S | 15.24022600  | -0.66668900 | 0.60953900  |
| S | 19.11798000  | 1.09928600  | 0.40707600  |
| H | -22.16413200 | 0.30282200  | -0.55431300 |
| H | -21.38058500 | -2.14438500 | -0.04018100 |
| H | -17.43068000 | 2.06773000  | 1.25249700  |
| H | -13.52606400 | -0.46888000 | -2.41813500 |
| H | -9.66239500  | -0.87651900 | 2.06596100  |
| H | -5.73284800  | 2.18021800  | -1.15605100 |
| H | -1.83868000  | -2.24408800 | -0.42762100 |
| H | 2.03287300   | 1.69945600  | 1.73612700  |
| H | 5.98060300   | -0.18340900 | -2.28504500 |
| H | 9.84625000   | -1.08586200 | 2.12976500  |
| H | 13.75333400  | 2.33389000  | -0.74527200 |
| H | 17.70608500  | -2.08400700 | -0.58100800 |
| H | 21.34311700  | 0.05820400  | 0.46496400  |
| C | 20.54896400  | -2.63939500 | -0.27792000 |
| C | 20.47536300  | -3.14284800 | -1.73144400 |
| C | 20.10822700  | -3.73484800 | 0.71077800  |
| H | 21.59817000  | -2.39881400 | -0.06203500 |
| H | 20.82037500  | -2.37790100 | -2.43348800 |
| H | 21.09773200  | -4.03453600 | -1.86318700 |
| H | 19.44917800  | -3.41045500 | -2.00628800 |
| H | 20.19730100  | -3.39284600 | 1.74619100  |
| H | 19.06462500  | -4.02275900 | 0.54263200  |
| H | 20.72398100  | -4.63291200 | 0.59214300  |
| C | 16.53007800  | 2.68036100  | -1.33890500 |
| C | 16.51502000  | 3.97419700  | -0.50196500 |
| C | 15.93717000  | 2.92257800  | -2.74000100 |
| H | 17.57537000  | 2.38508700  | -1.47475400 |
| H | 16.98255600  | 3.82190600  | 0.47551800  |
| H | 17.05820500  | 4.77282600  | -1.01866800 |
| H | 15.49039000  | 4.32263400  | -0.33083000 |
| H | 15.96265700  | 2.01114400  | -3.34458900 |
| H | 14.89639700  | 3.25983000  | -2.68473500 |
| H | 16.50694300  | 3.69663200  | -3.26507700 |
| C | 12.60702300  | -0.95338700 | 2.85097200  |
| C | 12.62482600  | -2.48984600 | 2.96903700  |
| C | 11.97537600  | -0.31067000 | 4.10036400  |
| H | 13.64595300  | -0.61250200 | 2.80155200  |
| H | 13.11659200  | -2.95002700 | 2.10667000  |
| H | 13.16112400  | -2.79994700 | 3.87238500  |
| H | 11.60779800  | -2.89332800 | 3.02783800  |
| H | 11.97673600  | 0.78098600  | 4.02849800  |
| H | 10.93934000  | -0.63679100 | 4.24194800  |
| H | 12.53582900  | -0.59404000 | 4.99754900  |
| C | 8.75536800   | -0.68861700 | -2.74093300 |
| C | 8.78657200   | 0.46413600  | -3.76329900 |
| C | 8.13909000   | -1.95815700 | -3.35842600 |

|   |              |             |             |
|---|--------------|-------------|-------------|
| H | 9.79083900   | -0.92664100 | -2.47746500 |
| H | 9.27211800   | 1.35230400  | -3.34776700 |
| H | 9.33543200   | 0.16548400  | -4.66296900 |
| H | 7.77359300   | 0.74969400  | -4.06791900 |
| H | 8.13094300   | -2.78436500 | -2.64137500 |
| H | 7.10805500   | -1.78794000 | -3.68662100 |
| H | 8.71628800   | -2.27219600 | -4.23451500 |
| C | 4.79900900   | 2.40257300  | 1.85710400  |
| C | 4.81980000   | 2.06042900  | 3.35974100  |
| C | 4.16416500   | 3.78498600  | 1.61502100  |
| H | 5.83720600   | 2.45919400  | 1.51495600  |
| H | 5.31463800   | 1.10200600  | 3.54355100  |
| H | 5.35396600   | 2.83319500  | 3.92302500  |
| H | 3.80313800   | 1.99343200  | 3.76293300  |
| H | 4.16116000   | 4.03982300  | 0.55110000  |
| H | 3.12960500   | 3.82252600  | 1.97271600  |
| H | 4.72562900   | 4.55860000  | 2.14944400  |
| C | 0.92640400   | -2.85162800 | -0.04589700 |
| C | 0.96020700   | -3.50000900 | -1.44357500 |
| C | 0.29318200   | -3.80130100 | 0.98857600  |
| H | 1.96161200   | -2.67833700 | 0.26483300  |
| H | 1.45708800   | -2.85167200 | -2.17163100 |
| H | 1.49906800   | -4.45316400 | -1.41292400 |
| H | -0.05276000  | -3.69878400 | -1.81080300 |
| H | 0.28029800   | -3.35040800 | 1.98525500  |
| H | -0.73787200  | -4.05819900 | 0.72276900  |
| H | 0.86194900   | -4.73550100 | 1.04415700  |
| C | -2.95607400  | 2.44844000  | -1.78048400 |
| C | -2.91648500  | 3.80304000  | -1.04605000 |
| C | -3.58041400  | 2.59757400  | -3.18046300 |
| H | -1.92228400  | 2.11683900  | -1.92040800 |
| H | -2.42741500  | 3.71376100  | -0.07131500 |
| H | -2.36683400  | 4.54454900  | -1.63586000 |
| H | -3.92738800  | 4.19061200  | -0.87763500 |
| H | -3.59874600  | 1.64100900  | -3.71103600 |
| H | -4.60836300  | 2.97204600  | -3.12654300 |
| H | -3.00215100  | 3.30884100  | -3.77960600 |
| C | -6.89526900  | -0.68787100 | 2.76407900  |
| C | -6.86776700  | -2.20349900 | 3.04230100  |
| C | -7.53052400  | 0.07805700  | 3.93980600  |
| H | -5.85827900  | -0.34777100 | 2.67837800  |
| H | -6.37231600  | -2.74827300 | 2.23295800  |
| H | -6.33024200  | -2.41393300 | 3.97323100  |
| H | -7.88213400  | -2.60544000 | 3.14279100  |
| H | -7.53576600  | 1.15624400  | 3.75443600  |
| H | -8.56449200  | -0.23758300 | 4.11599300  |
| H | -6.96808500  | -0.10687700 | 4.86111000  |
| C | -10.75558600 | -1.06507100 | -2.80179400 |

|    |              |             |             |
|----|--------------|-------------|-------------|
| C  | -10.70111200 | -0.04801500 | -3.95848300 |
| C  | -11.39309100 | -2.39016000 | -3.26055000 |
| H  | -9.72516100  | -1.28676700 | -2.50587400 |
| H  | -10.20429300 | 0.87747900  | -3.65206900 |
| H  | -10.15193700 | -0.46282800 | -4.81063600 |
| H  | -11.70822600 | 0.21239400  | -4.30260200 |
| H  | -11.41880500 | -3.12061100 | -2.44651000 |
| H  | -12.41968600 | -2.24380300 | -3.61318300 |
| H  | -10.81890500 | -2.82133000 | -4.08741600 |
| C  | -14.65165600 | 2.74017500  | 1.22882700  |
| C  | -14.65979200 | 2.70481700  | 2.76951700  |
| C  | -15.24362700 | 4.06176200  | 0.70333100  |
| H  | -13.60783100 | 2.69994400  | 0.90171800  |
| H  | -14.19488300 | 1.79000300  | 3.14938400  |
| H  | -14.11024600 | 3.56034000  | 3.17682800  |
| H  | -15.68251400 | 2.74659500  | 3.16042800  |
| H  | -15.22194900 | 4.09890300  | -0.38982200 |
| H  | -16.28289300 | 4.19389000  | 1.02307700  |
| H  | -14.67009900 | 4.91309200  | 1.08513400  |
| C  | -18.60996400 | -2.69129600 | 0.47280100  |
| C  | -18.59874100 | -3.66667200 | -0.72022400 |
| C  | -19.24548000 | -3.34480700 | 1.71455700  |
| H  | -17.56913500 | -2.46253700 | 0.72345300  |
| H  | -18.10096800 | -3.22637500 | -1.58947600 |
| H  | -18.07178200 | -4.59045900 | -0.45778100 |
| H  | -19.61748800 | -3.93626000 | -1.02060100 |
| H  | -19.23798100 | -2.66207800 | 2.56937000  |
| H  | -20.28429200 | -3.63882100 | 1.52877800  |
| H  | -18.69248800 | -4.24786500 | 1.99421500  |
| Li |              |             |             |
| C  | -21.01130000 | 0.15172900  | 0.08909600  |
| C  | -20.44726900 | 0.96232200  | 1.04028700  |
| C  | -19.01089800 | 0.96863700  | 1.08876800  |
| C  | -18.52367500 | 0.11154400  | 0.11142900  |
| C  | -17.13125300 | -0.21455800 | -0.15218900 |
| C  | -16.51497300 | -1.37661400 | -0.56259400 |
| C  | -15.07948500 | -1.39234700 | -0.58130000 |
| C  | -14.58304100 | -0.17659700 | -0.14665400 |
| C  | -13.19906800 | 0.23469000  | -0.03161200 |
| C  | -12.57641400 | 1.45726200  | -0.17662700 |
| C  | -11.14206900 | 1.47471800  | -0.13953700 |
| C  | -10.65114900 | 0.19368900  | 0.03346700  |
| C  | -9.27056900  | -0.23171400 | 0.13368900  |
| C  | -8.65950500  | -1.25628100 | 0.82658900  |
| C  | -7.22517400  | -1.29853000 | 0.81049000  |
| C  | -6.72278000  | -0.24159400 | 0.07444400  |
| C  | -5.33879000  | 0.08051200  | -0.20552200 |
| C  | -4.72257300  | 0.66762900  | -1.29102000 |



|   |              |             |             |
|---|--------------|-------------|-------------|
| C | -3.28804600  | 0.70238800  | -1.29459800 |
| C | -2.79156200  | 0.09735700  | -0.15515800 |
| C | -1.40867300  | -0.06817100 | 0.24276800  |
| C | -0.79257100  | -0.09291900 | 1.47662000  |
| C | 0.64204900   | -0.12551600 | 1.49547400  |
| C | 1.13794800   | -0.11335500 | 0.20531900  |
| C | 2.52064800   | -0.14601100 | -0.22527000 |
| C | 3.13702300   | -0.68859600 | -1.33340900 |
| C | 4.57134300   | -0.65765600 | -1.36984900 |
| C | 5.06644500   | -0.07094800 | -0.22039900 |
| C | 6.44816600   | 0.17288900  | 0.13912100  |
| C | 7.05501500   | 1.17001600  | 0.87387100  |
| C | 8.48955700   | 1.18181100  | 0.90771600  |
| C | 8.99444400   | 0.14374300  | 0.14736800  |
| C | 10.38043200  | -0.21262500 | -0.07576600 |
| C | 11.00756500  | -1.42335200 | -0.28366300 |
| C | 12.44207600  | -1.42194900 | -0.32608900 |
| C | 12.92506900  | -0.14238900 | -0.12715200 |
| C | 14.30389300  | 0.30216700  | -0.10984600 |
| C | 14.90616500  | 1.48106100  | -0.49445900 |
| C | 16.34150700  | 1.52405000  | -0.47164600 |
| C | 16.84877300  | 0.30873400  | -0.05798000 |
| C | 18.23913200  | -0.07114000 | 0.11772400  |
| C | 18.86538600  | -0.91926900 | 1.00055400  |
| C | 20.31404500  | -0.94675900 | 0.97260400  |
| C | 20.77222600  | -0.06437900 | 0.03072500  |
| S | -19.80710700 | -0.67834200 | -0.84570500 |
| S | -15.89205500 | 1.01710500  | 0.18327100  |
| S | -11.96951700 | -1.01802600 | 0.25552900  |
| S | -8.02981900  | 0.74385800  | -0.68471800 |
| S | -4.10354500  | -0.42100200 | 0.97019000  |
| S | -0.17421100  | -0.16709300 | -1.03192900 |
| S | 3.75331800   | 0.53544900  | 0.85810600  |
| S | 7.69202700   | -0.90807100 | -0.52493200 |
| S | 11.60164000  | 1.07517500  | 0.00880100  |
| S | 15.55230000  | -0.85699100 | 0.39767700  |
| S | 19.46623300  | 0.72122500  | -0.88906600 |
| H | -22.06116700 | -0.00689100 | -0.12477400 |
| H | -21.06885100 | 1.55189100  | 1.71072900  |
| H | -17.11949400 | -2.24491200 | -0.81303900 |
| H | -13.17271500 | 2.34747300  | -0.36280000 |
| H | -9.26409600  | -1.95976900 | 1.39447700  |
| H | -5.32358200  | 1.03595500  | -2.11931500 |
| H | -1.39306200  | -0.03723100 | 2.38177200  |
| H | 2.53720700   | -1.15809300 | -2.10980500 |
| H | 6.44737500   | 1.93233900  | 1.35610700  |
| H | 10.41619800  | -2.33295700 | -0.35930600 |
| H | 14.29641300  | 2.31035900  | -0.84523400 |

|             |              |             |             |
|-------------|--------------|-------------|-------------|
| H           | 18.27496000  | -1.48927500 | 1.71429200  |
| H           | 21.78530600  | 0.17239600  | -0.27289300 |
| Li          | 21.56949700  | -2.00838300 | 2.06230100  |
| Li          | 17.96459900  | 2.67310600  | -0.63974800 |
| Li          | 14.09673000  | -2.45197900 | -0.76566200 |
| Li          | 10.12782800  | 1.95265300  | 1.75472600  |
| Li          | 6.21602400   | -0.92002100 | -2.47568000 |
| Li          | 2.29321000   | -0.37677200 | 2.59332200  |
| Li          | -1.63811000  | 1.43553900  | -2.15195000 |
| Li          | -5.57898700  | -2.35141800 | 1.22641000  |
| Li          | -9.48916600  | 2.58979900  | -0.03373500 |
| Li          | -13.43066900 | -2.33553700 | -1.19049000 |
| Li          | -17.36133400 | 1.45435800  | 2.08033500  |
| <i>n</i> Bu |              |             |             |
| C           | -21.31514800 | 0.32874900  | 0.56537600  |
| C           | -20.84106600 | 1.51989900  | 0.09719100  |
| C           | -19.42490900 | 1.53993300  | -0.12241700 |
| C           | -18.83626900 | 0.32868700  | 0.19676900  |
| C           | -17.45023200 | -0.11935600 | 0.13039200  |
| C           | -16.98920900 | -1.35369300 | -0.26649100 |
| C           | -15.57931200 | -1.54244200 | -0.15176100 |
| C           | -14.94422700 | -0.41782100 | 0.34733700  |
| C           | -13.54047800 | -0.13742900 | 0.61579900  |
| C           | -13.02098600 | 0.59184300  | 1.66170000  |
| C           | -11.60748500 | 0.78260700  | 1.62857900  |
| C           | -11.02837900 | 0.18012100  | 0.52446100  |
| C           | -9.64326700  | 0.09577600  | 0.08205700  |
| C           | -9.17828300  | 0.15002000  | -1.21283800 |
| C           | -7.77333900  | -0.04686200 | -1.36363700 |
| C           | -7.14596300  | -0.25705000 | -0.14775600 |
| C           | -5.74626300  | -0.48318600 | 0.18834600  |
| C           | -5.24098600  | -1.36643300 | 1.11522100  |
| C           | -3.82602100  | -1.31712900 | 1.29319700  |
| C           | -3.23412100  | -0.36564500 | 0.48040400  |
| C           | -1.84148900  | 0.02988000  | 0.31386500  |
| C           | -1.34877300  | 1.30698600  | 0.17207000  |
| C           | 0.05710400   | 1.39483600  | -0.05580100 |
| C           | 0.65566300   | 0.14646300  | -0.09135600 |
| C           | 2.04188400   | -0.25588600 | -0.28799500 |
| C           | 2.50125100   | -1.34450700 | -0.99499300 |
| C           | 3.91376600   | -1.54113200 | -0.95952800 |
| C           | 4.55313700   | -0.57474000 | -0.20182100 |
| C           | 5.96204900   | -0.35887400 | 0.10010900  |
| C           | 6.50665200   | 0.04649600  | 1.29758000  |
| C           | 7.91695800   | 0.26321900  | 1.28216700  |
| C           | 8.46586000   | 0.01699000  | 0.03526800  |
| C           | 9.83769700   | 0.09440500  | -0.44937700 |
| C           | 10.26468700  | 0.56372700  | -1.67094100 |

|   |              |             |             |
|---|--------------|-------------|-------------|
| C | 11.66626100  | 0.44728600  | -1.91140200 |
| C | 12.32971200  | -0.12996800 | -0.84206100 |
| C | 13.73892700  | -0.43284400 | -0.62923600 |
| C | 14.27035400  | -1.54615400 | -0.01874700 |
| C | 15.69015400  | -1.53915300 | 0.12790000  |
| C | 16.25852200  | -0.38696800 | -0.38591100 |
| C | 17.64846700  | 0.04675300  | -0.47245400 |
| C | 18.15133400  | 1.30374400  | -0.22625000 |
| C | 19.55326600  | 1.44359200  | -0.47761500 |
| C | 20.10203500  | 0.26991400  | -0.92439700 |
| S | -20.03921800 | -0.82046500 | 0.77389700  |
| S | -16.10596500 | 0.86207200  | 0.67824900  |
| S | -12.24677300 | -0.61255400 | -0.46756500 |
| S | -8.30723400  | -0.21696100 | 1.17320200  |
| S | -4.43955400  | 0.46401100  | -0.49561700 |
| S | -0.53412100  | -1.12657300 | 0.15445900  |
| S | 3.39328700   | 0.56619900  | 0.46727800  |
| S | 7.22480500   | -0.47642000 | -1.10998900 |
| S | 11.20598000  | -0.52905300 | 0.45170800  |
| S | 15.02679500  | 0.68333200  | -1.04057200 |
| S | 18.93195400  | -1.00305200 | -1.05768600 |
| H | -22.33486900 | 0.06141400  | 0.80546400  |
| H | -21.47896100 | 2.37569100  | -0.09635800 |
| H | -17.65503300 | -2.11927500 | -0.65059900 |
| H | -13.64629000 | 0.97906000  | 2.45936300  |
| H | -9.83747300  | 0.34267600  | -2.05280400 |
| H | -5.87754100  | -2.05797800 | 1.65723400  |
| H | -1.98790700  | 2.18056800  | 0.24597500  |
| H | 1.83286400   | -1.99311400 | -1.55161400 |
| H | 5.90266400   | 0.17665700  | 2.18948700  |
| H | 9.58045800   | 1.00377600  | -2.38878700 |
| H | 13.64913400  | -2.37206800 | 0.31158200  |
| H | 17.52773200  | 2.11146500  | 0.14237700  |
| H | 21.13643800  | 0.07730700  | -1.17612600 |
| C | 20.32754700  | 2.71637200  | -0.23976500 |
| C | 20.51547200  | 3.05379600  | 1.25190700  |
| H | 21.04188100  | 2.22413700  | 1.74189600  |
| H | 19.53223600  | 3.11726100  | 1.73704600  |
| C | 16.42595900  | -2.65853000 | 0.82590800  |
| C | 16.09525100  | -2.75441100 | 2.32888900  |
| H | 16.35685500  | -1.80406300 | 2.81210000  |
| H | 15.01178000  | -2.87453900 | 2.46113200  |
| C | 12.28276300  | 0.86639000  | -3.22523700 |
| C | 11.84501400  | -0.02001500 | -4.40870500 |
| H | 12.13924600  | -1.05766600 | -4.20444500 |
| H | 10.74928500  | -0.02301500 | -4.48110000 |
| C | 8.65414400   | 0.77048000  | 2.49919900  |
| C | 8.28552400   | 2.22292600  | 2.86290400  |

|   |              |             |             |
|---|--------------|-------------|-------------|
| H | 8.52272500   | 2.87387200  | 2.01141900  |
| H | 7.20024700   | 2.30014200  | 3.01148900  |
| C | 4.56693700   | -2.72546000 | -1.63195100 |
| C | 4.25734400   | -4.06233700 | -0.92803600 |
| H | 4.60658800   | -4.00579000 | 0.111108200 |
| H | 3.16999700   | -4.20723400 | -0.87625500 |
| C | 0.74114500   | 2.72238000  | -0.28226500 |
| C | 0.32431000   | 3.40397000  | -1.60140200 |
| H | 0.56803700   | 2.73769700  | -2.43901900 |
| H | -0.76600600  | 3.53270400  | -1.62196400 |
| C | -3.12413500  | -2.17887200 | 2.31604100  |
| C | -3.44124200  | -1.76784800 | 3.76830000  |
| H | -3.12611900  | -0.72735000 | 3.92017200  |
| H | -4.52800000  | -1.78250300 | 3.92512400  |
| C | -7.11728100  | -0.08267400 | -2.72385400 |
| C | -7.54510500  | -1.30268100 | -3.56426800 |
| H | -7.28691100  | -2.21903900 | -3.01771600 |
| H | -8.63791900  | -1.31040000 | -3.67143600 |
| C | -10.89723300 | 1.61352400  | 2.67119000  |
| C | -11.25655200 | 3.11134700  | 2.59419700  |
| H | -10.98380700 | 3.49203700  | 1.60137400  |
| H | -12.34458600 | 3.23328200  | 2.67835100  |
| C | -14.92661400 | -2.86185900 | -0.49104700 |
| C | -15.33527200 | -4.00069600 | 0.46496800  |
| H | -15.06174600 | -3.71988400 | 1.49030400  |
| H | -16.42784100 | -4.11055500 | 0.46114600  |
| C | -18.72660400 | 2.74729100  | -0.70204800 |
| C | -19.15070900 | 3.05846500  | -2.15148800 |
| H | -18.92647600 | 2.18900300  | -2.78295400 |
| H | -20.23955400 | 3.19421700  | -2.19650400 |
| C | 16.82481900  | -3.90720200 | 3.02860300  |
| H | 17.90802400  | -3.78343800 | 2.89580400  |
| H | 16.56515100  | -4.85344200 | 2.53445500  |
| C | 16.50012900  | -4.00462200 | 4.52218500  |
| H | 17.03440500  | -4.83540200 | 4.99434900  |
| H | 16.78107600  | -3.08598300 | 5.04942300  |
| H | 15.42808500  | -4.16320200 | 4.68522900  |
| C | 12.44331400  | 0.43301800  | -5.74581800 |
| H | 13.53896400  | 0.43484000  | -5.66982400 |
| H | 12.15106300  | 1.47439300  | -5.93863500 |
| C | 12.01393100  | -0.44539800 | -6.92461300 |
| H | 12.32323300  | -1.48608700 | -6.77630200 |
| H | 10.92501000  | -0.43965000 | -7.04797000 |
| H | 12.45642600  | -0.09801900 | -7.86380900 |
| C | 9.00973000   | 2.72826600  | 4.11628000  |
| H | 10.09454800  | 2.64881200  | 3.96421400  |
| H | 8.77306700   | 2.06840400  | 4.96221900  |
| C | 8.64854400   | 4.17215500  | 4.47728800  |

|   |              |             |             |
|---|--------------|-------------|-------------|
| H | 8.90756100   | 4.86020700  | 3.66472900  |
| H | 7.57438700   | 4.27675700  | 4.66769700  |
| H | 9.17917200   | 4.50404400  | 5.37550500  |
| C | 4.90193500   | -5.26662900 | -1.62441600 |
| H | 5.98832200   | -5.11438600 | -1.67736100 |
| H | 4.55142100   | -5.31434900 | -2.66452900 |
| C | 4.60540200   | -6.59535900 | -0.92278400 |
| H | 4.97547900   | -6.58918700 | 0.10857800  |
| H | 3.52802900   | -6.79249400 | -0.88519100 |
| H | 5.07901300   | -7.43546200 | -1.44090700 |
| C | 1.00331200   | 4.76293400  | -1.80756000 |
| H | 2.09316600   | 4.62948200  | -1.78400200 |
| H | 0.76015500   | 5.42100600  | -0.96209900 |
| C | 0.59962000   | 5.44411400  | -3.11861700 |
| H | 0.86149300   | 4.82455700  | -3.98369100 |
| H | -0.48089800  | 5.62322400  | -3.15665400 |
| H | 1.10074500   | 6.41013400  | -3.23789500 |
| C | -2.76314800  | -2.66988600 | 4.80619500  |
| H | -1.67716300  | -2.65673300 | 4.64292200  |
| H | -3.08133400  | -3.70911900 | 4.64569400  |
| C | -3.06828100  | -2.25826400 | 6.24956800  |
| H | -2.72693000  | -1.23654100 | 6.45015800  |
| H | -4.14469100  | -2.29188600 | 6.45265500  |
| H | -2.57379900  | -2.92074900 | 6.96729900  |
| C | -6.89581900  | -1.33032700 | -4.95300200 |
| H | -5.80322900  | -1.32413300 | -4.84166800 |
| H | -7.15099000  | -0.40704300 | -5.49111400 |
| C | -7.31842800  | -2.54238300 | -5.78837300 |
| H | -6.84122000  | -2.53473700 | -6.77363900 |
| H | -7.04340800  | -3.48032600 | -5.29300500 |
| H | -8.40308400  | -2.55784600 | -5.94422300 |
| C | -10.56360100 | 3.94751800  | 3.67650500  |
| H | -9.47593800  | 3.82195200  | 3.58997100  |
| H | -10.83618600 | 3.55609200  | 4.66620900  |
| C | -10.91465300 | 5.43641700  | 3.60060600  |
| H | -10.40727700 | 6.00742400  | 4.38487200  |
| H | -10.62086900 | 5.86346600  | 2.63517600  |
| H | -11.99255800 | 5.59595900  | 3.71735700  |
| C | -14.68636900 | -5.34274800 | 0.10656500  |
| H | -13.59388300 | -5.23016500 | 0.11493000  |
| H | -14.95538500 | -5.61139500 | -0.92422900 |
| C | -15.09069300 | -6.47697900 | 1.05295200  |
| H | -14.61242700 | -7.42103400 | 0.77261500  |
| H | -14.80275300 | -6.25224000 | 2.08608300  |
| H | -16.17480400 | -6.63683800 | 1.04045900  |
| C | -18.45838100 | 4.30255300  | -2.72053900 |
| H | -17.36994000 | 4.16280000  | -2.67668900 |
| H | -18.67910400 | 5.16556500  | -2.07744100 |

|                 |              |             |             |
|-----------------|--------------|-------------|-------------|
| C               | -18.87568800 | 4.61750900  | -4.16008400 |
| H               | -18.36652200 | 5.51005200  | -4.53775400 |
| H               | -18.63418300 | 3.78719400  | -4.83315000 |
| H               | -19.95482800 | 4.79532500  | -4.23053600 |
| C               | 21.28328200  | 4.36090800  | 1.48088700  |
| H               | 22.26450500  | 4.29522100  | 0.99119900  |
| H               | 20.75214200  | 5.18447400  | 0.98436200  |
| C               | 21.47326800  | 4.69499100  | 2.96346100  |
| H               | 22.03240900  | 3.90595000  | 3.47883000  |
| H               | 22.02330600  | 5.63233100  | 3.09502700  |
| H               | 20.50861700  | 4.80107000  | 3.47237900  |
| H               | 21.31073500  | 2.63869600  | -0.71903600 |
| H               | 19.81176400  | 3.55245500  | -0.73153200 |
| H               | 16.17256500  | -3.61245000 | 0.34318300  |
| H               | 17.50549900  | -2.53240300 | 0.70866200  |
| H               | 13.37346200  | 0.85032400  | -3.15734200 |
| H               | 12.00268900  | 1.90748700  | -3.43675500 |
| H               | 8.42650600   | 0.11901000  | 3.35397900  |
| H               | 9.73435800   | 0.70813000  | 2.34491000  |
| H               | 5.65094500   | -2.59194500 | -1.67313400 |
| H               | 4.22272400   | -2.78155600 | -2.67351000 |
| H               | 0.50629800   | 3.39334800  | 0.55542200  |
| H               | 1.82684900   | 2.59758800  | -0.27925900 |
| H               | -2.04179200  | -2.14377600 | 2.16728600  |
| H               | -3.42246900  | -3.22561100 | 2.16790600  |
| H               | -7.37180900  | 0.83538100  | -3.27097500 |
| H               | -6.02900800  | -0.08769600 | -2.62183300 |
| H               | -9.81394100  | 1.50605000  | 2.57441400  |
| H               | -11.15671000 | 1.23537000  | 3.66945300  |
| H               | -15.19715600 | -3.14344100 | -1.51806100 |
| H               | -13.83819400 | -2.76392000 | -0.47702300 |
| H               | -18.94121900 | 3.62238800  | -0.07290800 |
| H               | -17.64262700 | 2.60986900  | -0.67452900 |
| NH <sub>2</sub> |              |             |             |
| C               | -21.00706800 | -0.88425600 | 0.25180200  |
| C               | -20.38533900 | -1.96414400 | 0.80566900  |
| C               | -18.95604600 | -1.85891400 | 0.80285500  |
| C               | -18.50939400 | -0.67325700 | 0.22903500  |
| C               | -17.16367200 | -0.17843000 | 0.05746400  |
| C               | -16.75655300 | 1.12895600  | -0.09118800 |
| C               | -15.35348800 | 1.29599600  | -0.28416900 |
| C               | -14.65808100 | 0.09053400  | -0.26265300 |
| C               | -13.24447000 | -0.17057500 | -0.37861100 |
| C               | -12.62807200 | -1.29399100 | -0.88246200 |
| C               | -11.20403300 | -1.27613700 | -0.80679800 |
| C               | -10.70181000 | -0.10635700 | -0.24379800 |
| C               | -9.34207300  | 0.30393200  | -0.01402000 |
| C               | -8.88501000  | 1.26677600  | 0.86167400  |

|   |              |             |             |
|---|--------------|-------------|-------------|
| C | -7.47599600  | 1.47581900  | 0.83325900  |
| C | -6.82234400  | 0.64127600  | -0.06940600 |
| C | -5.41821300  | 0.50739700  | -0.36466400 |
| C | -4.83389800  | 0.10891700  | -1.54662100 |
| C | -3.41151100  | 0.01802700  | -1.50685500 |
| C | -2.87565100  | 0.36684100  | -0.27029700 |
| C | -1.50586300  | 0.42548600  | 0.16463600  |
| C | -1.02659900  | 0.41070700  | 1.45830200  |
| C | 0.38944300   | 0.51968000  | 1.56949300  |
| C | 1.02588000   | 0.59973500  | 0.33380400  |
| C | 2.42856300   | 0.67521400  | 0.01204000  |
| C | 3.01652300   | 1.25802800  | -1.08872400 |
| C | 4.43372900   | 1.11442500  | -1.15309700 |
| C | 4.96236400   | 0.41595400  | -0.07132000 |
| C | 6.32664400   | 0.08472400  | 0.24288200  |
| C | 6.78524800   | -0.89758700 | 1.09610700  |
| C | 8.20257700   | -0.95513800 | 1.22987300  |
| C | 8.85998000   | -0.01071400 | 0.44704600  |
| C | 10.26982600  | 0.22882000  | 0.26336200  |
| C | 10.89508700  | 1.41550800  | -0.04781400 |
| C | 12.30652700  | 1.31610700  | -0.22738800 |
| C | 12.79214900  | 0.02634200  | -0.03804400 |
| C | 14.13848000  | -0.47958000 | -0.11124800 |
| C | 14.54476400  | -1.78338500 | -0.30336900 |
| C | 15.95769300  | -1.97365000 | -0.29047900 |
| C | 16.66137600  | -0.79117500 | -0.10276600 |
| C | 18.08816200  | -0.55030700 | -0.06950700 |
| C | 18.77772600  | 0.37281800  | 0.68124200  |
| C | 20.18929300  | 0.39803600  | 0.43397600  |
| C | 20.57074700  | -0.52069100 | -0.51184100 |
| S | -19.87868000 | 0.29910100  | -0.31121000 |
| S | -15.77817900 | -1.25819300 | -0.06370000 |
| S | -12.03203300 | 0.95333200  | 0.23439500  |
| S | -7.99181500  | -0.36148900 | -0.93154600 |
| S | -4.17462300  | 0.76436000  | 0.85968500  |
| S | -0.16652900  | 0.60494300  | -0.96802000 |
| S | 3.66106300   | -0.10284900 | 1.00566000  |
| S | 7.68873800   | 0.99560900  | -0.40804000 |
| S | 11.45782300  | -1.07379000 | 0.32369700  |
| S | 15.54650600  | 0.55634700  | 0.11835700  |
| S | 19.20618800  | -1.40851700 | -1.13285000 |
| H | -22.06892400 | -0.71878700 | 0.13536000  |
| H | -20.91396100 | -2.82053600 | 1.21029600  |
| H | -17.44671500 | 1.96526400  | -0.06709200 |
| H | -13.18144100 | -2.11112500 | -1.33280000 |
| H | -9.54372900  | 1.82227100  | 1.52032600  |
| H | -5.40887800  | -0.08539900 | -2.44571200 |
| H | -1.67411900  | 0.32296700  | 2.32395800  |

|                 |              |             |             |
|-----------------|--------------|-------------|-------------|
| H               | 2.44905600   | 1.81259300  | -1.82844300 |
| H               | 6.12178800   | -1.57317800 | 1.62505300  |
| H               | 10.35984800  | 2.35657800  | -0.11653800 |
| H               | 13.84709400  | -2.60027000 | -0.45334500 |
| H               | 18.29591700  | 0.99450600  | 1.42825300  |
| H               | 21.56854900  | -0.74810700 | -0.85912600 |
| N               | 21.05605300  | 1.21948700  | 1.16834700  |
| H               | 21.95608400  | 1.35949800  | 0.72747600  |
| H               | 20.64725300  | 2.11053300  | 1.42079400  |
| N               | 16.52185100  | -3.24433000 | -0.38866200 |
| H               | 16.05975000  | -3.86671700 | -1.03745200 |
| H               | 17.52768400  | -3.26590700 | -0.48830400 |
| N               | 13.09242100  | 2.43292000  | -0.49785600 |
| H               | 13.95711600  | 2.24347000  | -0.99068200 |
| H               | 12.58606200  | 3.20391200  | -0.91210500 |
| N               | 8.81086000   | -1.83357600 | 2.11860700  |
| H               | 8.37643200   | -2.74161600 | 2.20212500  |
| H               | 9.81951800   | -1.87980900 | 2.08689900  |
| N               | 5.18381900   | 1.68739300  | -2.17507200 |
| H               | 6.06185400   | 1.22617900  | -2.38124400 |
| H               | 4.65718400   | 1.88692800  | -3.01471600 |
| N               | 1.01303400   | 0.60495900  | 2.80765800  |
| H               | 0.60437800   | 0.04791200  | 3.54427600  |
| H               | 2.02287600   | 0.58621100  | 2.80904900  |
| N               | -2.66612900  | -0.32334600 | -2.63038600 |
| H               | -1.76831100  | -0.75344600 | -2.44327500 |
| H               | -3.18549400  | -0.82676700 | -3.33672200 |
| N               | -6.87747300  | 2.47100800  | 1.59435500  |
| H               | -7.27920700  | 2.62907200  | 2.50723300  |
| H               | -5.86797000  | 2.50019000  | 1.59258000  |
| N               | -10.42871500 | -2.31239500 | -1.31579300 |
| H               | -9.51912900  | -2.42801100 | -0.88533400 |
| H               | -10.91786700 | -3.19244400 | -1.40685900 |
| N               | -14.80204000 | 2.54412900  | -0.53609200 |
| H               | -15.23215400 | 3.32288900  | -0.05869000 |
| H               | -13.79431600 | 2.60037500  | -0.56789900 |
| N               | -18.14052800 | -2.87602200 | 1.29287800  |
| H               | -17.22633100 | -2.57905900 | 1.61345000  |
| H               | -18.59290700 | -3.48001000 | 1.96619300  |
| NO <sub>2</sub> |              |             |             |
| C               | -21.30067100 | 0.16184100  | -0.16947800 |
| C               | -20.93928700 | -1.00053100 | 0.43627200  |
| C               | -19.52592000 | -1.10626400 | 0.58770900  |
| C               | -18.79488400 | -0.01847900 | 0.11729400  |
| C               | -17.39084500 | 0.36355700  | 0.10496400  |
| C               | -16.94899100 | 1.66389900  | -0.00489700 |
| C               | -15.54495800 | 1.77483100  | -0.11353800 |
| C               | -14.86079700 | 0.56061100  | -0.11316600 |



|   |              |             |             |
|---|--------------|-------------|-------------|
| C | -13.47161700 | 0.15845900  | -0.25525900 |
| C | -13.07473600 | -1.09618600 | -0.66726800 |
| C | -11.67670900 | -1.28805000 | -0.61950200 |
| C | -10.95172600 | -0.19530000 | -0.14572600 |
| C | -9.55085200  | 0.07161000  | 0.13344600  |
| C | -9.11564500  | 1.05247500  | 0.99956500  |
| C | -7.71197300  | 1.20259900  | 1.02022000  |
| C | -7.02037800  | 0.35831400  | 0.15222900  |
| C | -5.62753400  | 0.17783200  | -0.22045700 |
| C | -5.22024900  | -0.39856900 | -1.40514300 |
| C | -3.82198800  | -0.57128000 | -1.49545900 |
| C | -3.10731900  | -0.15593700 | -0.37232700 |
| C | -1.71080600  | -0.17745600 | 0.02833600  |
| C | -1.28954000  | -0.12135400 | 1.34023500  |
| C | 0.11301000   | -0.03853100 | 1.47807700  |
| C | 0.81813000   | -0.00282400 | 0.27543100  |
| C | 2.21545900   | 0.13579000  | -0.09797300 |
| C | 2.63724000   | 0.58388900  | -1.33211300 |
| C | 4.03747100   | 0.52818400  | -1.50285800 |
| C | 4.73964000   | 0.01187200  | -0.41421100 |
| C | 6.13293400   | -0.29075300 | -0.13464700 |
| C | 6.54352400   | -1.19658500 | 0.82056300  |
| C | 7.94419600   | -1.23550000 | 0.99407000  |
| C | 8.65779300   | -0.34214300 | 0.19546300  |
| C | 10.05628500  | 0.02512000  | 0.05357000  |
| C | 10.48268700  | 1.23001400  | -0.46351100 |
| C | 11.88415500  | 1.31371000  | -0.61399700 |
| C | 12.58240700  | 0.16499600  | -0.24207200 |
| C | 13.97423900  | -0.25020300 | -0.26816000 |
| C | 14.37978900  | -1.56801100 | -0.27724100 |
| C | 15.78005400  | -1.72721100 | -0.18522500 |
| C | 16.49755100  | -0.53701600 | -0.07375000 |
| C | 17.89659000  | -0.18633500 | 0.11208900  |
| C | 18.32182900  | 0.99418700  | 0.69317900  |
| C | 19.72517900  | 1.14608000  | 0.63363700  |
| C | 20.37998100  | 0.11108500  | 0.01559500  |
| S | -19.92485400 | 1.13633900  | -0.56491500 |
| S | -16.01831200 | -0.73425700 | 0.10671800  |
| S | -12.06207900 | 1.12082000  | 0.16652500  |
| S | -8.17088900  | -0.69608300 | -0.63950600 |
| S | -4.22697200  | 0.53854200  | 0.77932100  |
| S | -0.31872700  | -0.16050700 | -1.04570300 |
| S | 3.60502600   | -0.33073200 | 0.87326000  |
| S | 7.53285900   | 0.49783000  | -0.84899700 |
| S | 11.44262400  | -1.00414000 | 0.38742900  |
| S | 15.37955000  | 0.80378600  | -0.17473400 |
| S | 19.28347200  | -1.10335100 | -0.48672200 |
| H | -22.29385500 | 0.50665600  | -0.42030400 |

|    |              |             |             |
|----|--------------|-------------|-------------|
| H  | -21.61844500 | -1.77119200 | 0.77193900  |
| H  | -17.58745900 | 2.53631200  | -0.00132300 |
| H  | -13.74255200 | -1.87459500 | -1.00925800 |
| H  | -9.75972900  | 1.65692300  | 1.62301600  |
| H  | -5.88071300  | -0.69037700 | -2.20980600 |
| H  | -1.94292700  | -0.14712100 | 2.20123500  |
| H  | 1.98599700   | 0.95781900  | -2.10989000 |
| H  | 5.88377300   | -1.83618700 | 1.39028500  |
| H  | 9.83396700   | 2.05358200  | -0.72765100 |
| H  | 13.71697700  | -2.41848600 | -0.35702300 |
| H  | 17.67350100  | 1.72293900  | 1.16017200  |
| H  | 21.44680800  | 0.00935600  | -0.11997600 |
| N  | 20.42164200  | 2.28856300  | 1.19665400  |
| O  | 21.64709300  | 2.31866200  | 1.08455600  |
| O  | 19.73380200  | 3.14937400  | 1.74644800  |
| N  | 16.33768600  | -3.06113900 | -0.19923500 |
| O  | 17.55860500  | -3.18128200 | -0.34516200 |
| O  | 15.55740900  | -4.00400300 | -0.07421700 |
| N  | 12.46259600  | 2.53212000  | -1.13365200 |
| O  | 13.69028700  | 2.66486900  | -1.07772100 |
| O  | 11.69523100  | 3.37418700  | -1.59601800 |
| N  | 8.50708400   | -2.15416100 | 1.95789300  |
| O  | 9.73279600   | -2.31450800 | 1.96328000  |
| O  | 7.72955000   | -2.73186400 | 2.71474000  |
| N  | 4.61101200   | 0.98270500  | -2.74965500 |
| O  | 5.83883300   | 1.11215900  | -2.81336200 |
| O  | 3.84020300   | 1.22342400  | -3.67632000 |
| N  | 0.68581200   | 0.01115700  | 2.80453600  |
| O  | 1.91099900   | -0.11229000 | 2.91515300  |
| O  | -0.08296400  | 0.16504400  | 3.75104600  |
| N  | -3.26249300  | -1.15224100 | -2.69520600 |
| O  | -2.03517600  | -1.11918400 | -2.84077800 |
| O  | -4.04348200  | -1.63999200 | -3.50920200 |
| N  | -7.12434600  | 2.18970900  | 1.89790700  |
| O  | -5.89735400  | 2.17772800  | 2.04954300  |
| O  | -7.88282100  | 2.98230000  | 2.45191700  |
| N  | -11.12757400 | -2.55731300 | -1.04065700 |
| O  | -9.90205200  | -2.64461300 | -1.17960100 |
| O  | -11.91495300 | -3.47832200 | -1.24593400 |
| N  | -14.95180900 | 3.08783400  | -0.22616700 |
| O  | -13.72407600 | 3.18488300  | -0.11729500 |
| O  | -15.70702300 | 4.03918900  | -0.41701300 |
| N  | -18.97113900 | -2.28084600 | 1.21852400  |
| O  | -17.74941200 | -2.46172600 | 1.14645300  |
| O  | -19.75026200 | -3.04415000 | 1.78515700  |
| OH |              |             |             |
| C  | -21.09672300 | -0.03832200 | -0.00229700 |
| C  | -20.59935200 | -1.03892500 | 0.78056600  |

|   |              |             |             |
|---|--------------|-------------|-------------|
| C | -19.17510200 | -1.01348800 | 0.85700600  |
| C | -18.59588000 | 0.00986800  | 0.12185300  |
| C | -17.19914100 | 0.34927600  | -0.01706100 |
| C | -16.63146600 | 1.57882600  | -0.25803100 |
| C | -15.21415600 | 1.54314200  | -0.34525600 |
| C | -14.66283600 | 0.28405300  | -0.15335100 |
| C | -13.27925400 | -0.11634400 | -0.16019200 |
| C | -12.73880000 | -1.34732000 | -0.45746100 |
| C | -11.32302700 | -1.38516400 | -0.35841200 |
| C | -10.74319000 | -0.17602700 | 0.00055100  |
| C | -9.35224500  | 0.15386300  | 0.17329600  |
| C | -8.78978300  | 1.13693500  | 0.95645000  |
| C | -7.37332000  | 1.18602500  | 0.87660400  |
| C | -6.81463200  | 0.22717600  | 0.04251700  |
| C | -5.42963800  | -0.02552000 | -0.25917800 |
| C | -4.88401600  | -0.60928900 | -1.38070100 |
| C | -3.46851700  | -0.70799700 | -1.33841000 |
| C | -2.89348900  | -0.18351800 | -0.18888100 |
| C | -1.50435000  | -0.09792000 | 0.18021200  |
| C | -0.94901200  | -0.03670500 | 1.43878000  |
| C | 0.46786900   | 0.05114000  | 1.43110400  |
| C | 1.03374600   | 0.04020500  | 0.16350000  |
| C | 2.42131100   | 0.09920500  | -0.21709600 |
| C | 2.97513300   | 0.56103200  | -1.39013100 |
| C | 4.39111100   | 0.46425300  | -1.42672300 |
| C | 4.95769800   | -0.05819100 | -0.27230000 |
| C | 6.34536100   | -0.27813600 | 0.04474400  |
| C | 6.89726100   | -1.19113200 | 0.91505700  |
| C | 8.31353900   | -1.12141900 | 0.98910600  |
| C | 8.88181000   | -0.16346300 | 0.16123800  |
| C | 10.27032100  | 0.16951000  | -0.03076200 |
| C | 10.82303500  | 1.36652200  | -0.42666000 |
| C | 12.23973700  | 1.33469800  | -0.52119200 |
| C | 12.80679100  | 0.11487200  | -0.18176200 |
| C | 14.19619800  | -0.26864600 | -0.15381100 |
| C | 14.75061100  | -1.51579500 | -0.32979800 |
| C | 16.16848500  | -1.52602500 | -0.23174700 |
| C | 16.73147800  | -0.28265700 | 0.00677400  |
| C | 18.12441700  | 0.07543800  | 0.15082800  |
| C | 18.68595100  | 1.07201800  | 0.91263900  |
| C | 20.10785400  | 1.13346500  | 0.80178600  |
| C | 20.63674100  | 0.18278700  | -0.03198700 |
| S | -19.84762200 | 0.95819400  | -0.67245900 |
| S | -15.95069800 | -0.89517200 | 0.07734700  |
| S | -12.00376800 | 1.02054500  | 0.28787200  |
| S | -8.09626800  | -0.71569500 | -0.71382400 |
| S | -4.15873900  | 0.38517800  | 0.89695200  |
| S | -0.24087900  | -0.01289300 | -1.05134800 |

|    |              |             |             |
|----|--------------|-------------|-------------|
| S  | 3.68451800   | -0.50301200 | 0.86082300  |
| S  | 7.61077900   | 0.71740800  | -0.68186200 |
| S  | 11.53520100  | -1.04098000 | 0.20371300  |
| S  | 15.45939800  | 0.92197200  | 0.17177100  |
| S  | 19.37903000  | -0.78400600 | -0.74904200 |
| H  | -22.13187900 | 0.17552600  | -0.22827900 |
| H  | -21.19924800 | -1.77415200 | 1.30197300  |
| H  | -17.19565400 | 2.49815200  | -0.35399400 |
| H  | -13.32092700 | -2.20743500 | -0.76430500 |
| H  | -9.35666800  | 1.80154600  | 1.59659500  |
| H  | -5.46207700  | -0.94461700 | -2.23292900 |
| H  | -1.52116600  | -0.07486600 | 2.35752100  |
| H  | 2.40281300   | 0.98415900  | -2.20641400 |
| H  | 6.32323400   | -1.91607400 | 1.47887600  |
| H  | 10.24947200  | 2.26301000  | -0.62746500 |
| H  | 14.17829700  | -2.40876100 | -0.54914500 |
| H  | 18.12138500  | 1.72781900  | 1.56404300  |
| H  | 21.67372100  | -0.00599700 | -0.27079300 |
| O  | 20.78946600  | 2.07217900  | 1.51614500  |
| H  | 21.73535400  | 1.98243300  | 1.34166100  |
| O  | 16.83747100  | -2.69812100 | -0.38451700 |
| H  | 17.76870800  | -2.57952400 | -0.13773000 |
| O  | 12.90457900  | 2.45395200  | -0.90694700 |
| H  | 13.82708800  | 2.23738100  | -1.11744100 |
| O  | 8.97751300   | -1.96819500 | 1.81693400  |
| H  | 9.89713000   | -1.67702200 | 1.92452500  |
| O  | 5.05669800   | 0.88492300  | -2.53262300 |
| H  | 5.97519400   | 0.57215500  | -2.50921500 |
| O  | 1.13449800   | 0.12195500  | 2.61152400  |
| H  | 2.05494800   | 0.39017500  | 2.46040600  |
| O  | -2.81107700  | -1.26946200 | -2.38506100 |
| H  | -1.89439500  | -1.46909300 | -2.13653200 |
| O  | -6.69994300  | 2.11572800  | 1.60132100  |
| H  | -5.78232000  | 2.18138900  | 1.29215100  |
| O  | -10.66980300 | -2.54496700 | -0.62499100 |
| H  | -9.75024100  | -2.48870700 | -0.31982800 |
| O  | -14.53495800 | 2.69378300  | -0.58613800 |
| H  | -13.61680800 | 2.49514500  | -0.83001000 |
| O  | -18.52921600 | -1.93980500 | 1.61381400  |
| H  | -17.60419800 | -1.67688400 | 1.74310600  |
| Ph |              |             |             |
| C  | 21.63992800  | 0.09868800  | -0.54134700 |
| C  | 21.17140100  | 1.38026000  | -0.53981600 |
| C  | 19.76336400  | 1.48350500  | -0.28490100 |
| C  | 19.17562200  | 0.23957400  | -0.10536800 |
| C  | 17.78612200  | -0.14379400 | 0.11074100  |
| C  | 17.31483700  | -1.15135800 | 0.92093300  |
| C  | 15.90869200  | -1.38429900 | 0.83528900  |

|   |              |             |             |
|---|--------------|-------------|-------------|
| C | 15.29211200  | -0.52077100 | -0.06063100 |
| C | 13.88940000  | -0.33942500 | -0.40420800 |
| C | 13.37314800  | 0.02367000  | -1.62826700 |
| C | 11.96532800  | 0.25692400  | -1.64299300 |
| C | 11.39160000  | 0.05477500  | -0.39437400 |
| C | 10.00213500  | 0.09298700  | 0.03725300  |
| C | 9.52173000   | 0.49774800  | 1.26284500  |
| C | 8.12063200   | 0.30519100  | 1.45385900  |
| C | 7.51527200   | -0.25454900 | 0.33605600  |
| C | 6.11806200   | -0.54304800 | 0.04781600  |
| C | 5.62156700   | -1.58170200 | -0.70807900 |
| C | 4.21347600   | -1.54103600 | -0.93659100 |
| C | 3.61897400   | -0.44323400 | -0.32769400 |
| C | 2.22360400   | -0.04341300 | -0.22485200 |
| C | 1.72954000   | 1.24138100  | -0.17758400 |
| C | 0.32566000   | 1.33880300  | 0.05786300  |
| C | -0.26881500  | 0.08967300  | 0.18352700  |
| C | -1.66324800  | -0.29489000 | 0.34370400  |
| C | -2.15317200  | -1.37692100 | 1.04094200  |
| C | -3.55967200  | -1.58500700 | 0.91967800  |
| C | -4.15997600  | -0.62628300 | 0.11338500  |
| C | -5.55699100  | -0.39336300 | -0.22043900 |
| C | -6.05595700  | 0.11494900  | -1.39931200 |
| C | -7.46056700  | 0.36535200  | -1.40063100 |
| C | -8.05109200  | 0.02735000  | -0.18962900 |
| C | -9.44391900  | 0.03303000  | 0.23098400  |
| C | -9.92825200  | 0.26657300  | 1.49909200  |
| C | -11.33403700 | 0.07595600  | 1.65179300  |
| C | -11.94021100 | -0.30338700 | 0.46099800  |
| C | -13.33939100 | -0.52338900 | 0.12614400  |
| C | -13.84396500 | -1.42240300 | -0.78679400 |
| C | -15.25081400 | -1.32821900 | -1.01139400 |
| C | -15.83393500 | -0.33421700 | -0.23757200 |
| C | -17.22718400 | 0.06084100  | -0.07417300 |
| C | -17.72631300 | 1.33654800  | 0.05076800  |
| C | -19.14139000 | 1.40023900  | 0.26816300  |
| C | -19.69444600 | 0.14048400  | 0.31287100  |
| S | 20.36993500  | -1.03997600 | -0.25537800 |
| S | 16.46274500  | 0.56460400  | -0.79065000 |
| S | 12.60423200  | -0.41594900 | 0.78398200  |
| S | 8.69025800   | -0.54036100 | -0.93597800 |
| S | 4.81294800   | 0.52741700  | 0.51702000  |
| S | 0.92061600   | -1.19010900 | 0.01335600  |
| S | -2.97296800  | 0.51845400  | -0.48814900 |
| S | -6.85655500  | -0.59288100 | 0.93763000  |
| S | -10.75949000 | -0.42361700 | -0.83229700 |
| S | -14.63532400 | 0.47479900  | 0.75452300  |
| S | -18.52238900 | -1.11186000 | 0.10399300  |

|   |              |             |             |
|---|--------------|-------------|-------------|
| H | 22.65719200  | -0.24131100 | -0.67683700 |
| H | 21.80576200  | 2.24855600  | -0.67505200 |
| H | 17.96657700  | -1.74110900 | 1.55567200  |
| H | 13.99376900  | 0.14901800  | -2.50841200 |
| H | 10.16431600  | 0.90779300  | 2.03384800  |
| H | 6.25665400   | -2.35724200 | -1.12129000 |
| H | 2.36409300   | 2.11392400  | -0.28475700 |
| H | -1.51416700  | -2.03637200 | 1.61741000  |
| H | -5.42446100  | 0.33411200  | -2.25295200 |
| H | -9.28521800  | 0.54724100  | 2.32569200  |
| H | -13.21477200 | -2.12879100 | -1.31651400 |
| H | -17.09935500 | 2.21373600  | -0.05954300 |
| H | -20.72995900 | -0.11937000 | 0.48310500  |
| C | -19.90475200 | 2.65744500  | 0.41601400  |
| C | -19.31465000 | 3.79065300  | 1.00086100  |
| C | -21.23799200 | 2.75231600  | -0.01779700 |
| C | -20.03392600 | 4.97516900  | 1.14983400  |
| H | -18.29200200 | 3.73535400  | 1.36166400  |
| C | -21.95867300 | 3.93443300  | 0.13747200  |
| H | -21.70264200 | 1.89824700  | -0.50156500 |
| C | -21.35980300 | 5.05253300  | 0.72100600  |
| H | -19.55881800 | 5.83739200  | 1.60894800  |
| H | -22.98700800 | 3.98599900  | -0.20877500 |
| H | -21.92006900 | 5.97546400  | 0.83739000  |
| C | -15.94397800 | -2.19045200 | -1.99914300 |
| C | -16.83348700 | -1.65010800 | -2.94266500 |
| C | -15.67761600 | -3.56891900 | -2.04285800 |
| C | -17.44349700 | -2.46589300 | -3.89327300 |
| H | -17.03415200 | -0.58369700 | -2.93379900 |
| C | -16.28853400 | -4.38410800 | -2.99480200 |
| H | -14.99785600 | -4.00307300 | -1.31537000 |
| C | -17.17448000 | -3.83572300 | -3.92314100 |
| H | -18.12485600 | -2.02896600 | -4.61759700 |
| H | -16.07393700 | -5.44883400 | -3.00871600 |
| H | -17.64964500 | -4.46988000 | -4.66580400 |
| C | -12.00432300 | 0.24131700  | 2.96482100  |
| C | -12.86222500 | -0.74656000 | 3.47577600  |
| C | -11.74434100 | 1.37536900  | 3.75182700  |
| C | -13.45062700 | -0.59779100 | 4.73001300  |
| H | -13.05582500 | -1.63787600 | 2.88774400  |
| C | -12.33313600 | 1.52270200  | 5.00709900  |
| H | -11.08720500 | 2.15031400  | 3.36783400  |
| C | -13.18961000 | 0.53730400  | 5.49999900  |
| H | -14.10916700 | -1.37362900 | 5.10947700  |
| H | -12.12470400 | 2.40962600  | 5.59853300  |
| H | -13.64824000 | 0.65128400  | 6.47780700  |
| C | -8.14504500  | 0.95583600  | -2.57699300 |
| C | -8.98368300  | 2.07502700  | -2.44666900 |

|   |              |             |             |
|---|--------------|-------------|-------------|
| C | -7.91806300  | 0.43398200  | -3.86106600 |
| C | -9.58491000  | 2.64672000  | -3.56605200 |
| H | -9.15184300  | 2.50116600  | -1.46283700 |
| C | -8.52015900  | 1.00711700  | -4.98046200 |
| H | -7.27623400  | -0.43469800 | -3.97625800 |
| C | -9.35681900  | 2.11474200  | -4.83665200 |
| H | -10.22785400 | 3.51383500  | -3.44626200 |
| H | -8.33778700  | 0.58553700  | -5.96474700 |
| H | -9.82586300  | 2.56185700  | -5.70814000 |
| C | -4.23705200  | -2.73189900 | 1.57266400  |
| C | -5.09759400  | -3.57721600 | 0.85305000  |
| C | -3.98287200  | -3.02596200 | 2.92244600  |
| C | -5.69429800  | -4.67533200 | 1.46905000  |
| H | -5.28759100  | -3.37373700 | -0.19585700 |
| C | -4.58007300  | -4.12552600 | 3.53751500  |
| H | -3.32422800  | -2.37770300 | 3.49319300  |
| C | -5.43919600  | -4.95320200 | 2.81335700  |
| H | -6.35485300  | -5.31919300 | 0.89571200  |
| H | -4.37647500  | -4.33305600 | 4.58407900  |
| H | -5.90463600  | -5.80978100 | 3.29195300  |
| C | -0.35434300  | 2.65131700  | 0.18172000  |
| C | -1.20377800  | 2.93405400  | 1.26403700  |
| C | -0.11393400  | 3.66228800  | -0.76327400 |
| C | -1.80295300  | 4.18572100  | 1.38930800  |
| H | -1.38300000  | 2.16926400  | 2.01283600  |
| C | -0.71354300  | 4.91462900  | -0.63638100 |
| H | 0.53602000   | 3.45655400  | -1.60891000 |
| C | -1.56144700  | 5.18036900  | 0.43968800  |
| H | -2.45472300  | 4.38657100  | 2.23457800  |
| H | -0.52033700  | 5.68154600  | -1.38091300 |
| H | -2.02868100  | 6.15565500  | 0.53921900  |
| C | 3.52934000   | -2.56033000 | -1.76944900 |
| C | 2.66441700   | -2.18953000 | -2.81219800 |
| C | 3.78128700   | -3.92645000 | -1.56137600 |
| C | 2.06156500   | -3.15672100 | -3.61369600 |
| H | 2.47626500   | -1.13694400 | -2.99748700 |
| C | 3.17777500   | -4.89332200 | -2.36445800 |
| H | 4.44338500   | -4.22847900 | -0.75501500 |
| C | 2.31460500   | -4.51191700 | -3.39255000 |
| H | 1.39803000   | -2.85072700 | -4.41725200 |
| H | 3.37976000   | -5.94521100 | -2.18405500 |
| H | 1.84447200   | -5.26460600 | -4.01851800 |
| C | 7.45293500   | 0.64832800  | 2.73318900  |
| C | 6.60924800   | -0.26687700 | 3.38409500  |
| C | 7.69819300   | 1.88764800  | 3.34711900  |
| C | 6.02013700   | 0.05388500  | 4.60527700  |
| H | 6.42636600   | -1.23595600 | 2.93122200  |
| C | 7.10851700   | 2.20716400  | 4.56945800  |

|    |              |             |             |
|----|--------------|-------------|-------------|
| H  | 8.34346900   | 2.60786700  | 2.85244200  |
| C  | 6.26607800   | 1.29196300  | 5.20211100  |
| H  | 5.37256500   | -0.66758400 | 5.09490900  |
| H  | 7.30487000   | 3.17326500  | 5.02542000  |
| H  | 5.80646900   | 1.54029500  | 6.15421300  |
| C  | 11.26097500  | 0.70052700  | -2.87086100 |
| C  | 10.39233500  | 1.80425300  | -2.85496000 |
| C  | 11.49615600  | 0.05023700  | -4.09345100 |
| C  | 9.77042200   | 2.23624300  | -4.02449500 |
| H  | 10.21676200  | 2.32892600  | -1.92139600 |
| C  | 10.87343800  | 0.48374000  | -5.26319000 |
| H  | 12.16045000  | -0.80870300 | -4.12001000 |
| C  | 10.00715700  | 1.57740900  | -5.23253700 |
| H  | 9.10447900   | 3.09366300  | -3.99328200 |
| H  | 11.06285600  | -0.03592200 | -6.19799500 |
| H  | 9.52205400   | 1.91570400  | -6.14338300 |
| C  | 15.24950200  | -2.46350300 | 1.61056600  |
| C  | 14.38843900  | -3.38547300 | 0.99275000  |
| C  | 15.52312800  | -2.61563600 | 2.97990000  |
| C  | 13.81071700  | -4.41999600 | 1.72574900  |
| H  | 14.18313400  | -3.29207000 | -0.06877300 |
| C  | 14.94474500  | -3.65155800 | 3.71213400  |
| H  | 16.18219800  | -1.90667700 | 3.47268800  |
| C  | 14.08539600  | -4.55675900 | 3.08786700  |
| H  | 13.14961000  | -5.12491000 | 1.23013300  |
| H  | 15.16325700  | -3.74893200 | 4.77165400  |
| H  | 13.63479000  | -5.36406400 | 3.65760100  |
| C  | 19.08186700  | 2.79663500  | -0.18406600 |
| C  | 18.22262800  | 3.09537000  | 0.88632600  |
| C  | 19.32843700  | 3.79352900  | -1.14259300 |
| C  | 17.62104900  | 4.34809000  | 0.98717200  |
| H  | 18.03721700  | 2.34219200  | 1.64521600  |
| C  | 18.72628200  | 5.04682000  | -1.04030200 |
| H  | 19.98403800  | 3.57542100  | -1.98075000 |
| C  | 17.86929500  | 5.32840700  | 0.02452100  |
| H  | 16.96182600  | 4.56097700  | 1.82368200  |
| H  | 18.92424300  | 5.80204400  | -1.79548500 |
| H  | 17.40004300  | 6.30447500  | 0.10495300  |
| SH |              |             |             |
| C  | -21.28717900 | -0.16914300 | -0.11673700 |
| C  | -20.83696500 | -0.68794000 | 1.06161800  |
| C  | -19.41548200 | -0.62094600 | 1.19786200  |
| C  | -18.78534200 | -0.04452100 | 0.10488400  |
| C  | -17.38911300 | 0.22207200  | -0.17847000 |
| C  | -16.89199000 | 1.11285000  | -1.10595800 |
| C  | -15.47834400 | 1.10211700  | -1.23280100 |
| C  | -14.85526400 | 0.19570500  | -0.38539000 |
| C  | -13.46255700 | -0.12705900 | -0.17003200 |



|   |              |             |             |
|---|--------------|-------------|-------------|
| C | -12.96751100 | -1.22183000 | 0.51015600  |
| C | -11.55527900 | -1.24966500 | 0.63186800  |
| C | -10.92803500 | -0.16606700 | 0.02965600  |
| C | -9.53456300  | 0.19474100  | -0.09791500 |
| C | -9.03448100  | 1.41813000  | -0.49893700 |
| C | -7.62162200  | 1.47180500  | -0.59981400 |
| C | -6.99858900  | 0.27602300  | -0.26464900 |
| C | -5.60642200  | -0.10753200 | -0.21468100 |
| C | -5.10985400  | -1.39320900 | -0.12691900 |
| C | -3.69879800  | -1.47299000 | -0.01922800 |
| C | -3.07260200  | -0.23245600 | -0.03255200 |
| C | -1.68043700  | 0.14736400  | 0.03786800  |
| C | -1.18310600  | 1.41722100  | 0.25635000  |
| C | 0.23032800   | 1.51161900  | 0.21032000  |
| C | 0.85725200   | 0.29648700  | -0.03819400 |
| C | 2.25115900   | -0.06612400 | -0.15220400 |
| C | 2.75369400   | -1.26120000 | -0.62856300 |
| C | 4.16508000   | -1.37330200 | -0.56516100 |
| C | 4.78530700   | -0.24595900 | -0.04023400 |
| C | 6.17600400   | 0.07072200  | 0.19140300  |
| C | 6.66701700   | 1.12217300  | 0.94054900  |
| C | 8.08035800   | 1.23336200  | 0.94325500  |
| C | 8.71173100   | 0.25086600  | 0.19140700  |
| C | 10.10778900  | -0.01829800 | -0.07015800 |
| C | 10.61659100  | -0.82169100 | -1.07081800 |
| C | 12.02688700  | -0.97356900 | -1.04373900 |
| C | 12.63645100  | -0.27402100 | -0.01097900 |
| C | 14.02330000  | -0.13818000 | 0.37854700  |
| C | 14.49242200  | 0.30521600  | 1.59823900  |
| C | 15.90677600  | 0.41676900  | 1.68010100  |
| C | 16.55064400  | 0.04954900  | 0.50997100  |
| C | 17.95531300  | 0.00672800  | 0.14649300  |
| C | 18.49087600  | 0.23577700  | -1.10193200 |
| C | 19.90262400  | 0.03335000  | -1.16842700 |
| C | 20.43872700  | -0.34710300 | 0.03310900  |
| S | -19.98754300 | 0.41835300  | -1.09589500 |
| S | -16.06400900 | -0.65908300 | 0.56827600  |
| S | -12.13247600 | 0.90298500  | -0.68344000 |
| S | -8.20769600  | -0.92894000 | 0.16865200  |
| S | -4.27773000  | 1.04475700  | -0.16756000 |
| S | -0.34956500  | -0.97169600 | -0.22963400 |
| S | 3.57443400   | 0.95881600  | 0.38927600  |
| S | 7.51167500   | -0.81524800 | -0.53269700 |
| S | 11.42030200  | 0.57464300  | 0.93907000  |
| S | 15.37409600  | -0.43952800 | -0.70441900 |
| S | 19.22417500  | -0.48318800 | 1.26546500  |
| H | -22.30710500 | -0.08340900 | -0.46431000 |
| H | -21.48201900 | -1.09559700 | 1.83030600  |

|                  |              |             |             |
|------------------|--------------|-------------|-------------|
| H                | -17.52106200 | 1.76771700  | -1.69685300 |
| H                | -13.59759600 | -1.99954800 | 0.92480500  |
| H                | -9.66187000  | 2.27219900  | -0.72417500 |
| H                | -5.73817200  | -2.27575300 | -0.13623600 |
| H                | -1.81232900  | 2.27859900  | 0.44578300  |
| H                | 2.12932100   | -2.05688700 | -1.01691600 |
| H                | 6.03230300   | 1.81452000  | 1.48068500  |
| H                | 9.99642200   | -1.30408100 | -1.81698200 |
| H                | 13.83854000  | 0.55303100  | 2.42649700  |
| H                | 17.89236500  | 0.56113300  | -1.94504000 |
| H                | 21.47382900  | -0.53962500 | 0.27735600  |
| S                | 20.77815800  | 0.30106800  | -2.69685800 |
| H                | 21.99967000  | -0.03223300 | -2.23747000 |
| S                | 16.63078600  | 0.97752900  | 3.20775300  |
| H                | 17.82305400  | 1.34978900  | 2.70112500  |
| S                | 12.82272900  | -1.93924000 | -2.31661200 |
| H                | 13.67888100  | -2.61273400 | -1.52057900 |
| S                | 8.85845200   | 2.51235700  | 1.91712000  |
| H                | 9.70929900   | 2.96302100  | 0.97158200  |
| S                | 4.96449900   | -2.83843400 | -1.20342000 |
| H                | 5.68477000   | -3.14413400 | -0.10323100 |
| S                | 1.02600900   | 3.07762900  | 0.54041100  |
| H                | 1.74009300   | 3.16228400  | -0.60235200 |
| S                | -2.90416100  | -3.07291900 | 0.03594400  |
| H                | -2.21043300  | -2.89078700 | 1.17973400  |
| S                | -6.82546000  | 3.00779300  | -1.04677300 |
| H                | -6.07031000  | 2.53085700  | -2.05885600 |
| S                | -10.76421500 | -2.63795700 | 1.43183900  |
| H                | -10.03517900 | -1.93848100 | 2.32716600  |
| S                | -14.68211900 | 2.24953800  | -2.34738000 |
| H                | -13.95653700 | 1.35006300  | -3.04522000 |
| S                | -18.63982500 | -1.29165800 | 2.65914100  |
| H                | -17.81095000 | -0.25820500 | 2.91605700  |
| SiH <sub>3</sub> |              |             |             |
| C                | -21.18434300 | 0.39219500  | -0.00373100 |
| C                | -20.69303300 | 1.12212100  | 1.04124500  |
| C                | -19.26800500 | 1.03703400  | 1.20211400  |
| C                | -18.69878000 | 0.21519400  | 0.23872800  |
| C                | -17.31397100 | -0.17171400 | 0.01681900  |
| C                | -16.83454700 | -1.37914800 | -0.44360300 |
| C                | -15.41685200 | -1.45023000 | -0.60746100 |
| C                | -14.80338300 | -0.25287500 | -0.25794000 |
| C                | -13.40428200 | 0.13728900  | -0.26593200 |
| C                | -12.87636900 | 1.38804500  | -0.50967700 |
| C                | -11.45530900 | 1.48152400  | -0.40634000 |
| C                | -10.88720000 | 0.25697900  | -0.07289700 |
| C                | -9.50115600  | -0.12164000 | 0.13756800  |
| C                | -9.00582800  | -1.08265400 | 0.99439400  |

|   |              |             |             |
|---|--------------|-------------|-------------|
| C | -7.58996700  | -1.26340300 | 0.95548700  |
| C | -6.99243400  | -0.40833000 | 0.03623400  |
| C | -5.59976100  | -0.23606800 | -0.33748700 |
| C | -5.09155900  | 0.11928600  | -1.56962300 |
| C | -3.67194100  | 0.26139200  | -1.62649000 |
| C | -3.08461400  | 0.00421500  | -0.39234800 |
| C | -1.69404000  | 0.03395800  | 0.02420900  |
| C | -1.19056400  | 0.35387600  | 1.26821500  |
| C | 0.22832000   | 0.26045900  | 1.39499500  |
| C | 0.82052400   | -0.14392000 | 0.20354500  |
| C | 2.21394300   | -0.36874900 | -0.13734500 |
| C | 2.72998900   | -1.27446500 | -1.04094200 |
| C | 4.14805900   | -1.23477100 | -1.20250900 |
| C | 4.72603000   | -0.26410700 | -0.39166800 |
| C | 6.11236200   | 0.13410000  | -0.22433100 |
| C | 6.60160100   | 1.38892700  | 0.07401900  |
| C | 8.01916700   | 1.47202200  | 0.22228300  |
| C | 8.62471300   | 0.23515500  | 0.02875700  |
| C | 10.02137400  | -0.15854100 | 0.08237800  |
| C | 10.54412100  | -1.37446000 | 0.47124200  |
| C | 11.96478400  | -1.48502300 | 0.38032600  |
| C | 12.53772900  | -0.31019500 | -0.09387400 |
| C | 13.92516500  | 0.03768900  | -0.34629000 |
| C | 14.42176700  | 0.89122300  | -1.30926500 |
| C | 15.83776600  | 1.07727500  | -1.28687700 |
| C | 16.43180000  | 0.33822700  | -0.27173500 |
| C | 17.82629100  | 0.21766900  | 0.12592500  |
| C | 18.33534900  | 0.08388600  | 1.39889500  |
| C | 19.76120700  | -0.04380200 | 1.45948500  |
| C | 20.31417900  | -0.00459400 | 0.20024600  |
| S | -19.91846800 | -0.42309900 | -0.85348300 |
| S | -15.98404300 | 0.93766900  | 0.26324400  |
| S | -12.11502700 | -0.98487900 | 0.10998200  |
| S | -8.18636300  | 0.59957300  | -0.76458800 |
| S | -4.29271000  | -0.40752900 | 0.81353500  |
| S | -0.38266700  | -0.40492800 | -1.04837100 |
| S | 3.51142500   | 0.58136200  | 0.55309600  |
| S | 7.43588300   | -1.00596900 | -0.33070900 |
| S | 11.31535200  | 0.90679600  | -0.42099800 |
| S | 15.23867600  | -0.57086600 | 0.63765600  |
| S | 19.12903600  | 0.16576900  | -1.05011300 |
| H | -22.21190400 | 0.28448500  | -0.32247100 |
| H | -21.32966400 | 1.70118400  | 1.70100400  |
| H | -17.49658800 | -2.21150200 | -0.65617400 |
| H | -13.50548600 | 2.23227200  | -0.77017700 |
| H | -9.65451500  | -1.64865000 | 1.65415100  |
| H | -5.73399200  | 0.26923900  | -2.43054300 |
| H | -1.83578600  | 0.66392100  | 2.08306000  |

|    |              |             |             |
|----|--------------|-------------|-------------|
| H  | 2.09465200   | -1.96936800 | -1.57937200 |
| H  | 5.94685400   | 2.24744100  | 0.17723800  |
| H  | 9.91204000   | -2.18002700 | 0.82896800  |
| H  | 13.77454700  | 1.37533400  | -2.03264200 |
| H  | 17.69566100  | 0.10477500  | 2.27500100  |
| H  | 21.35998900  | -0.06539300 | -0.07034400 |
| Si | -18.41283200 | 1.89162200  | 2.64224300  |
| H  | -17.49328100 | 0.97072800  | 3.35603900  |
| H  | -17.64373900 | 3.09145900  | 2.21933200  |
| H  | -19.48175400 | 2.33580200  | 3.57537200  |
| Si | -14.61518400 | -3.00387100 | -1.30451000 |
| H  | -13.68598200 | -2.68236900 | -2.41607100 |
| H  | -13.87120900 | -3.77170500 | -0.27222300 |
| H  | -15.71646600 | -3.86070600 | -1.81633000 |
| Si | -10.59349500 | 3.14018700  | -0.63168900 |
| H  | -9.65917800  | 3.42149400  | 0.48629400  |
| H  | -9.84114700  | 3.21972300  | -1.91068300 |
| H  | -11.65987900 | 4.17499000  | -0.65439900 |
| Si | -6.77038400  | -2.59252300 | 2.00744800  |
| H  | -5.85661100  | -3.43593800 | 1.19783400  |
| H  | -6.00555700  | -2.02222000 | 3.14676700  |
| H  | -7.86360900  | -3.43610700 | 2.55653600  |
| Si | -2.83754700  | 0.81874500  | -3.21977300 |
| H  | -1.92243900  | 1.96238300  | -2.98154100 |
| H  | -2.07153800  | -0.27545900 | -3.87057800 |
| H  | -3.92299500  | 1.24086000  | -4.14271700 |
| Si | 1.05813100   | 0.58792100  | 3.05321100  |
| H  | 1.99203300   | -0.50661400 | 3.41595400  |
| H  | 1.80272800   | 1.87370400  | 3.07021400  |
| H  | -0.02776100  | 0.66527800  | 4.06472500  |
| Si | 4.99465400   | -2.35186400 | -2.45977400 |
| H  | 5.90764100   | -1.58064800 | -3.33920700 |
| H  | 5.76670200   | -3.44645900 | -1.81655600 |
| H  | 3.91717000   | -2.96240100 | -3.28112400 |
| Si | 8.82972600   | 3.10071900  | 0.70794400  |
| H  | 9.74879900   | 2.92610400  | 1.85978400  |
| H  | 9.58509200   | 3.71451700  | -0.41467500 |
| H  | 7.73088300   | 4.02509500  | 1.09062300  |
| Si | 12.82202600  | -3.10817300 | 0.79942700  |
| H  | 13.75580500  | -3.52057000 | -0.27751500 |
| H  | 13.57362000  | -3.03761900 | 2.07929300  |
| H  | 11.75258700  | -4.12993900 | 0.94299900  |
| Si | 16.66958600  | 2.27323200  | -2.47935900 |
| H  | 17.60238600  | 3.18149700  | -1.76749500 |
| H  | 17.41626700  | 1.57368800  | -3.55681900 |
| H  | 15.58683700  | 3.07328600  | -3.10912300 |
| Si | 20.78424800  | -0.22293000 | 3.01919900  |
| H  | 20.40559400  | -1.44870800 | 3.77097700  |

|     |              |             |             |
|-----|--------------|-------------|-------------|
| H   | 22.21600500  | -0.31192000 | 2.63307800  |
| H   | 20.59488300  | 0.94347000  | 3.92192300  |
| SMe |              |             |             |
| C   | 21.49496600  | 0.00157100  | 0.35388300  |
| C   | 21.06090900  | -0.83507000 | -0.63086900 |
| C   | 19.63651100  | -0.85776700 | -0.76856500 |
| C   | 18.98698500  | -0.02365800 | 0.13265900  |
| C   | 17.58216800  | 0.27033600  | 0.34224100  |
| C   | 17.06288200  | 1.31158800  | 1.08177900  |
| C   | 15.64483600  | 1.33416000  | 1.16127300  |
| C   | 15.04539200  | 0.29179100  | 0.46424600  |
| C   | 13.65675500  | -0.06855000 | 0.27616500  |
| C   | 13.17861700  | -1.26334800 | -0.22252300 |
| C   | 11.76617600  | -1.33322200 | -0.34332400 |
| C   | 11.12586100  | -0.17165300 | 0.07515300  |
| C   | 9.72691100   | 0.19209900  | 0.12294400  |
| C   | 9.21311700   | 1.45604600  | 0.33388400  |
| C   | 7.79602100   | 1.52285600  | 0.36775000  |
| C   | 7.18770600   | 0.28722100  | 0.17304900  |
| C   | 5.79643500   | -0.10486700 | 0.13033900  |
| C   | 5.30579100   | -1.39520400 | 0.15724600  |
| C   | 3.89364400   | -1.49569800 | 0.06282000  |
| C   | 3.26500200   | -0.25884400 | -0.03488200 |
| C   | 1.87033700   | 0.10532600  | -0.15047100 |
| C   | 1.37067200   | 1.34763500  | -0.48632700 |
| C   | -0.04547700  | 1.43878300  | -0.48242800 |
| C   | -0.66756700  | 0.24187500  | -0.14265000 |
| C   | -2.06281600  | -0.11423700 | -0.01038500 |
| C   | -2.56490100  | -1.27343800 | 0.54699700  |
| C   | -3.97935000  | -1.38162500 | 0.51945700  |
| C   | -4.59818500  | -0.28210500 | -0.06602900 |
| C   | -5.99163600  | 0.02583300  | -0.30034600 |
| C   | -6.48714200  | 1.03111100  | -1.10657800 |
| C   | -7.90217900  | 1.13828800  | -1.11993000 |
| C   | -8.52736300  | 0.19476900  | -0.31152900 |
| C   | -9.92295300  | -0.05604900 | -0.02624800 |
| C   | -10.42416400 | -0.85198200 | 0.98414800  |
| C   | -11.83926900 | -0.95776000 | 1.01028700  |
| C   | -12.45843700 | -0.22565400 | 0.00301100  |
| C   | -13.85272400 | -0.04850900 | -0.34034100 |
| C   | -14.34885500 | 0.49243800  | -1.50894400 |
| C   | -15.76476700 | 0.58785700  | -1.56460200 |
| C   | -16.38700800 | 0.10873900  | -0.41843200 |
| C   | -17.78572900 | 0.01928000  | -0.04322900 |
| C   | -18.27553500 | -0.18272000 | 1.23050300  |
| C   | -19.69781200 | -0.28268000 | 1.29789000  |
| C   | -20.28388100 | -0.15171600 | 0.06471600  |
| S   | 20.17108500  | 0.78133700  | 1.15585000  |

|   |              |             |             |
|---|--------------|-------------|-------------|
| S | 16.27351100  | -0.71353300 | -0.29986500 |
| S | 12.31019700  | 1.00876900  | 0.62928700  |
| S | 8.40893900   | -0.96109700 | -0.05786700 |
| S | 4.46049700   | 1.03460100  | 0.00031700  |
| S | 0.53983900   | -1.00386500 | 0.16454100  |
| S | -3.39033800  | 0.89322100  | -0.57858400 |
| S | -7.32536100  | -0.83583400 | 0.46016300  |
| S | -11.25125700 | 0.60453300  | -0.97451700 |
| S | -15.18585500 | -0.47524000 | 0.72691500  |
| S | -19.11362100 | 0.09741900  | -1.19565000 |
| H | 22.50932700  | 0.20702300  | 0.66592600  |
| H | 21.71586200  | -1.43142700 | -1.25432100 |
| H | 17.67562500  | 2.06611600  | 1.56080300  |
| H | 13.81901300  | -2.09499800 | -0.49157600 |
| H | 9.83103000   | 2.33838000  | 0.45136900  |
| H | 5.93687500   | -2.27057200 | 0.25526200  |
| H | 1.99895000   | 2.19084200  | -0.74797800 |
| H | -1.94037900  | -2.04220200 | 0.98640100  |
| H | -5.85713100  | 1.68540400  | -1.69744300 |
| H | -9.79871700  | -1.35136200 | 1.71460900  |
| H | -13.72000200 | 0.81071400  | -2.33198700 |
| H | -17.63756700 | -0.24535800 | 2.10487600  |
| H | -21.33355600 | -0.16914300 | -0.18830000 |
| S | -20.49699100 | -0.53309400 | 2.86363700  |
| S | -16.59308400 | 1.21916400  | -3.01382300 |
| S | -12.67398300 | -1.90633500 | 2.26984600  |
| S | -8.73148300  | 2.35023000  | -2.13313300 |
| S | -4.81592800  | -2.78894400 | 1.22820100  |
| S | -0.87940600  | 2.95147200  | -0.92844200 |
| S | 3.07038300   | -3.07749100 | 0.12007100  |
| S | 6.94516200   | 3.07532800  | 0.58706100  |
| S | 10.95760500  | -2.81123900 | -0.93001300 |
| S | 14.78553600  | 2.62627400  | 2.04137500  |
| S | 18.83250700  | -1.90311200 | -1.96885200 |
| C | -22.25081400 | -0.60367300 | 2.37520100  |
| H | -22.43516900 | -1.43504200 | 1.69061300  |
| H | -22.81568100 | -0.76697300 | 3.29475300  |
| H | -22.57242100 | 0.33688800  | 1.92163400  |
| C | -16.91363300 | 2.95662200  | -2.51146800 |
| H | -17.59903700 | 2.99532600  | -1.66300900 |
| H | -15.97946600 | 3.46614500  | -2.26897500 |
| H | -17.37813300 | 3.44322300  | -3.37228600 |
| C | -12.98929500 | -3.48368100 | 1.38198300  |
| H | -13.67435900 | -3.32981600 | 0.54642300  |
| H | -12.05316500 | -3.92140300 | 1.03126600  |
| H | -13.45305800 | -4.15510000 | 2.10831900  |
| C | -9.02647600  | 3.69269600  | -0.91395300 |
| H | -9.70138800  | 3.35890800  | -0.12393000 |

|             |              |             |             |
|-------------|--------------|-------------|-------------|
| H           | -8.08371100  | 4.03924100  | -0.48723900 |
| H           | -9.49562700  | 4.50979300  | -1.46688400 |
| C           | -1.16284000  | 3.70180000  | 0.72480600  |
| H           | -1.83365000  | 3.08281700  | 1.32312900  |
| H           | -0.21622800  | 3.85049800  | 1.24706000  |
| H           | -1.63254600  | 4.67139900  | 0.54393300  |
| C           | 6.62566500   | 3.05451900  | 2.39646900  |
| H           | 5.95304200   | 2.23760900  | 2.66367700  |
| H           | 7.56155000   | 2.97298400  | 2.95186500  |
| H           | 6.14682300   | 4.00758500  | 2.63282000  |
| C           | 14.46768000  | 1.80805500  | 3.65565300  |
| H           | 13.79558800  | 0.95672400  | 3.53436900  |
| H           | 15.40426800  | 1.49035400  | 4.11689800  |
| H           | 13.98862100  | 2.55800600  | 4.28931900  |
| C           | 18.57647700  | -0.72682300 | -3.35707100 |
| H           | 17.89529200  | 0.07469100  | -3.06634000 |
| H           | 19.52889600  | -0.31275900 | -3.69240600 |
| H           | 18.12750300  | -1.30468100 | -4.16825100 |
| C           | 10.72214600  | -2.40757500 | -2.70705200 |
| H           | 10.04159500  | -1.56286400 | -2.82732300 |
| H           | 11.68055300  | -2.19439400 | -3.18342800 |
| H           | 10.27980600  | -3.29495700 | -3.16568000 |
| C           | 2.84882900   | -3.42823900 | -1.66984100 |
| H           | 2.18245400   | -2.69668900 | -2.13020800 |
| H           | 3.81263600   | -3.43939200 | -2.18161900 |
| H           | 2.39425800   | -4.41962300 | -1.73303800 |
| C           | -5.09235300  | -3.82796400 | -0.26169900 |
| H           | -5.76066100  | -3.32902700 | -0.96566500 |
| H           | -4.14377100  | -4.06956000 | -0.74418800 |
| H           | -5.56338700  | -4.74824700 | 0.09143700  |
| <i>t</i> Bu |              |             |             |
| C           | -20.93728100 | 0.59005700  | 0.38469400  |
| C           | -20.50258500 | 1.63761300  | -0.37494200 |
| C           | -19.11570700 | 1.57264400  | -0.74720700 |
| C           | -18.51631600 | 0.43325400  | -0.22992600 |
| C           | -17.15143300 | -0.10516600 | -0.30655400 |
| C           | -16.75027500 | -1.26120900 | -0.92991900 |
| C           | -15.37112600 | -1.61412300 | -0.76131200 |
| C           | -14.71552100 | -0.68408800 | 0.03235600  |
| C           | -13.32624600 | -0.56116200 | 0.49514100  |
| C           | -12.86989800 | -0.67090400 | 1.78575900  |
| C           | -11.47745900 | -0.39180300 | 1.98003400  |
| C           | -10.86956800 | -0.04703000 | 0.78125600  |
| C           | -9.49229000  | 0.32144700  | 0.42527700  |
| C           | -9.05260800  | 1.54412100  | -0.01985700 |
| C           | -7.67168700  | 1.60943100  | -0.39809700 |
| C           | -7.05599500  | 0.37601800  | -0.23946600 |
| C           | -5.68115500  | -0.09477400 | -0.45765700 |

|   |              |             |             |
|---|--------------|-------------|-------------|
| C | -5.25437700  | -1.00763800 | -1.39111900 |
| C | -3.87156300  | -1.37735300 | -1.31382500 |
| C | -3.24031600  | -0.71848200 | -0.26816500 |
| C | -1.86116000  | -0.72179500 | 0.23864500  |
| C | -1.43508400  | -1.16584300 | 1.46685200  |
| C | -0.05241000  | -0.93889000 | 1.76748500  |
| C | 0.58182600   | -0.28771200 | 0.71815000  |
| C | 1.95868600   | 0.17411600  | 0.49969700  |
| C | 2.36476700   | 1.47021900  | 0.29109400  |
| C | 3.75087400   | 1.64720700  | -0.02622700 |
| C | 4.41017300   | 0.42639200  | -0.06163500 |
| C | 5.80409200   | 0.03901200  | -0.31389300 |
| C | 6.26569200   | -0.75513700 | -1.33564100 |
| C | 7.65871300   | -1.08816200 | -1.28630700 |
| C | 8.26370900   | -0.52263700 | -0.17269200 |
| C | 9.63973500   | -0.53564100 | 0.34087300  |
| C | 10.07117300  | -1.07446300 | 1.52869300  |
| C | 11.44970000  | -0.85047700 | 1.85048300  |
| C | 12.07354600  | -0.10255200 | 0.86221500  |
| C | 13.44850700  | 0.38580200  | 0.68870600  |
| C | 13.86740300  | 1.69395800  | 0.68585800  |
| C | 15.25116700  | 1.90376900  | 0.37730100  |
| C | 15.89156000  | 0.69832000  | 0.12782000  |
| C | 17.27686900  | 0.35057200  | -0.21862700 |
| C | 17.73600800  | -0.15549200 | -1.40910100 |
| C | 19.13189800  | -0.49030600 | -1.42414600 |
| C | 19.70843000  | -0.24095500 | -0.20515600 |
| S | -19.66411100 | -0.53061600 | 0.69015100  |
| S | -15.80584200 | 0.58567800  | 0.56333000  |
| S | -12.01834300 | -0.06152700 | -0.54644200 |
| S | -8.18438000  | -0.83113500 | 0.35386400  |
| S | -4.35703700  | 0.32231200  | 0.59894000  |
| S | -0.53344500  | 0.03988000  | -0.59833100 |
| S | 3.31258700   | -0.90323700 | 0.27343400  |
| S | 7.10956500   | 0.38511800  | 0.79085700  |
| S | 10.95451200  | 0.31985900  | -0.42326900 |
| S | 14.78273200  | -0.65568700 | 0.26537000  |
| S | 18.58358100  | 0.38641200  | 0.95486900  |
| H | -21.93239800 | 0.41502200  | 0.76969700  |
| H | -21.16387600 | 2.43851700  | -0.67767600 |
| H | -17.45165000 | -1.85008400 | -1.50602200 |
| H | -13.54029300 | -0.95033000 | 2.58765800  |
| H | -9.72656100  | 2.38886500  | -0.07086200 |
| H | -5.93919800  | -1.40843100 | -2.12665500 |
| H | -2.12241300  | -1.64880100 | 2.14862900  |
| H | 1.66054600   | 2.28824600  | 0.36477900  |
| H | 5.59758100   | -1.09611400 | -2.11533600 |
| H | 9.39221100   | -1.62826400 | 2.16344700  |



|   |             |             |             |
|---|-------------|-------------|-------------|
| H | 13.17625900 | 2.49709100  | 0.90450400  |
| H | 17.07914600 | -0.27158200 | -2.26381300 |
| H | 20.73878700 | -0.38263800 | 0.08688400  |
| C | 19.84999600 | -1.04131600 | -2.65504600 |
| C | 19.74477300 | -0.01762700 | -3.80923900 |
| C | 21.33755300 | -1.30732900 | -2.36241800 |
| C | 19.18231300 | -2.36775800 | -3.08554400 |
| H | 18.70253400 | 0.18571600  | -4.07389800 |
| H | 20.21201700 | 0.93316900  | -3.53370900 |
| H | 20.24851600 | -0.39827500 | -4.70486800 |
| H | 21.46430700 | -2.04293600 | -1.56126200 |
| H | 21.83140400 | -1.70110700 | -3.25648200 |
| H | 21.86024800 | -0.39013200 | -2.07133000 |
| H | 19.67786100 | -2.77407600 | -3.97440800 |
| H | 19.24551600 | -3.11508700 | -2.28827200 |
| H | 18.12470000 | -2.22694400 | -3.32877500 |
| C | 15.88258600 | 3.30799900  | 0.34740500  |
| C | 16.70385800 | 3.53919200  | 1.63849700  |
| C | 16.78979200 | 3.48856200  | -0.88947200 |
| C | 14.78887600 | 4.39716800  | 0.28166800  |
| H | 16.07958200 | 3.40650700  | 2.52828800  |
| H | 17.54759500 | 2.84932000  | 1.71022400  |
| H | 17.10281900 | 4.56009500  | 1.65466900  |
| H | 16.22051200 | 3.34759100  | -1.81423400 |
| H | 17.20332900 | 4.50301400  | -0.89904300 |
| H | 17.62422600 | 2.78600800  | -0.89907100 |
| H | 15.26123000 | 5.38052000  | 0.19189800  |
| H | 14.13172600 | 4.26097800  | -0.58330400 |
| H | 14.16993500 | 4.41710600  | 1.18401800  |
| C | 12.09152700 | -1.39613700 | 3.13963100  |
| C | 12.92401200 | -2.65925600 | 2.81481200  |
| C | 12.99048300 | -0.33507600 | 3.81178600  |
| C | 11.00401100 | -1.79360600 | 4.16250900  |
| H | 12.30565100 | -3.42208400 | 2.33033000  |
| H | 13.76221300 | -2.43114500 | 2.15247000  |
| H | 13.33252800 | -3.08996900 | 3.73618200  |
| H | 12.41479700 | 0.56256400  | 4.06044500  |
| H | 13.40535200 | -0.73881600 | 4.74183000  |
| H | 13.82488000 | -0.03340600 | 3.17733900  |
| H | 11.48086600 | -2.10785300 | 5.09629300  |
| H | 10.33786400 | -0.95572400 | 4.39236200  |
| H | 10.39342500 | -2.63204700 | 3.81345100  |
| C | 8.33059100  | -1.96623900 | -2.35839200 |
| C | 9.12086000  | -1.07454600 | -3.34570100 |
| C | 9.27607800  | -3.00786300 | -1.72040900 |
| C | 7.26897000  | -2.74368400 | -3.16864000 |
| H | 8.46839700  | -0.32359200 | -3.80315600 |
| H | 9.94294600  | -0.55295500 | -2.85059400 |

|   |             |             |             |
|---|-------------|-------------|-------------|
| H | 9.54746600  | -1.68662400 | -4.14878500 |
| H | 8.72999400  | -3.65896400 | -1.02989200 |
| H | 9.71309600  | -3.63660100 | -2.50372500 |
| H | 10.09522900 | -2.54531400 | -1.16828400 |
| H | 7.77035300  | -3.41629200 | -3.87178800 |
| H | 6.62950100  | -3.35157200 | -2.52056900 |
| H | 6.62925900  | -2.07913600 | -3.75731600 |
| C | 4.35942800  | 3.03725100  | -0.28914400 |
| C | 5.11389100  | 3.52622600  | 0.97010200  |
| C | 5.31912000  | 3.01042600  | -1.49953800 |
| C | 3.24973300  | 4.06513500  | -0.60506400 |
| H | 4.44970100  | 3.54801700  | 1.84035800  |
| H | 5.96387700  | 2.88274400  | 1.20824000  |
| H | 5.49645100  | 4.54105000  | 0.81107600  |
| H | 4.79652200  | 2.68114100  | -2.40364500 |
| H | 5.70998700  | 4.01728200  | -1.68271900 |
| H | 6.16979700  | 2.34614100  | -1.34315300 |
| H | 3.70756400  | 5.02446700  | -0.86597500 |
| H | 2.63110700  | 3.74772700  | -1.45070900 |
| H | 2.59380200  | 4.24285200  | 0.25266000  |
| C | 0.57784300  | -1.37465600 | 3.10351100  |
| C | 1.40256700  | -2.66795600 | 2.89894900  |
| C | 1.47812500  | -0.26255700 | 3.68522000  |
| C | -0.51795900 | -1.67592200 | 4.15024100  |
| H | 0.78310900  | -3.46378500 | 2.47246800  |
| H | 2.25260600  | -2.50587800 | 2.23271900  |
| H | 1.79414400  | -3.02210100 | 3.85958200  |
| H | 0.90237100  | 0.65227000  | 3.85975800  |
| H | 1.89498000  | -0.58804300 | 4.64458700  |
| H | 2.31085400  | -0.01476300 | 3.02583800  |
| H | -0.04727400 | -1.91431100 | 5.10923900  |
| H | -1.17837500 | -0.81667400 | 4.30536000  |
| H | -1.13353600 | -2.53617100 | 3.86938400  |
| C | -3.23259400 | -2.38129800 | -2.29128300 |
| C | -2.40646800 | -1.62196600 | -3.35644400 |
| C | -2.32801300 | -3.38811100 | -1.54690000 |
| C | -4.32131900 | -3.19420900 | -3.02694000 |
| H | -3.02780300 | -0.89423200 | -3.88866200 |
| H | -1.56527800 | -1.08743600 | -2.90959100 |
| H | -2.00248000 | -2.32548400 | -4.09357600 |
| H | -2.89981000 | -3.94685100 | -0.79862900 |
| H | -1.91105100 | -4.10778900 | -2.25986000 |
| H | -1.49509100 | -2.90132900 | -1.03783800 |
| H | -3.84502000 | -3.94759300 | -3.66229700 |
| H | -4.98143300 | -3.71592400 | -2.32645800 |
| H | -4.93786800 | -2.56553300 | -3.67669300 |
| C | -7.01805600 | 2.91038800  | -0.89985300 |
| C | -6.19596100 | 3.55479200  | 0.24206100  |

|   |              |             |             |
|---|--------------|-------------|-------------|
| C | -6.10670400  | 2.64900500  | -2.11884700 |
| C | -8.09544300  | 3.92731900  | -1.33860000 |
| H | -6.82501900  | 3.74433800  | 1.11809900  |
| H | -5.36529900  | 2.91718700  | 0.55289500  |
| H | -5.77774400  | 4.51284700  | -0.08781200 |
| H | -6.67710500  | 2.21252200  | -2.94542800 |
| H | -5.67714800  | 3.59460900  | -2.46713000 |
| H | -5.28286200  | 1.97309000  | -1.88582900 |
| H | -7.60909500  | 4.81377800  | -1.75814600 |
| H | -8.75619300  | 3.51232000  | -2.10656200 |
| H | -8.71230100  | 4.26401200  | -0.49972300 |
| C | -10.80749900 | -0.48463900 | 3.36355000  |
| C | -10.01070500 | -1.80676200 | 3.46940500  |
| C | -9.86759900  | 0.71457500  | 3.61648500  |
| C | -11.87079900 | -0.48152000 | 4.48463300  |
| H | -10.65940500 | -2.67001900 | 3.28781100  |
| H | -9.18937400  | -1.84211500 | 2.75009900  |
| H | -9.58252300  | -1.91047000 | 4.47310400  |
| H | -10.41663400 | 1.66007200  | 3.55652400  |
| H | -9.43501800  | 0.63835000  | 4.62005600  |
| H | -9.04528900  | 0.75771700  | 2.90109600  |
| H | -11.37144100 | -0.47442200 | 5.45868300  |
| H | -12.51426700 | 0.40265000  | 4.43151000  |
| H | -12.50668200 | -1.37167700 | 4.45422700  |
| C | -14.76008900 | -2.87000500 | -1.40921000 |
| C | -13.96886400 | -2.46928000 | -2.67714900 |
| C | -13.82862500 | -3.61594800 | -0.42826100 |
| C | -15.86970700 | -3.85850400 | -1.83225600 |
| H | -14.60967700 | -1.93615900 | -3.38719800 |
| H | -13.12064600 | -1.82450800 | -2.43553800 |
| H | -13.57901700 | -3.36310200 | -3.17786300 |
| H | -14.37040100 | -3.91239900 | 0.47595200  |
| H | -13.44404900 | -4.52440100 | -0.90471200 |
| H | -12.97324000 | -3.01136700 | -0.12403400 |
| H | -15.41243600 | -4.77468100 | -2.21911800 |
| H | -16.50992900 | -4.13432500 | -0.98805700 |
| H | -16.50433900 | -3.45385000 | -2.62655800 |
| C | -18.44585800 | 2.65691600  | -1.61153100 |
| C | -17.61572700 | 3.60332600  | -0.71156400 |
| C | -17.53712000 | 2.03591100  | -2.69528500 |
| C | -19.51070800 | 3.50881100  | -2.33829200 |
| H | -18.24263300 | 4.05320700  | 0.06529600  |
| H | -16.79420100 | 3.07649100  | -0.22100800 |
| H | -17.18469500 | 4.41381500  | -1.31078800 |
| H | -18.10862700 | 1.36832900  | -3.34850400 |
| H | -17.10807300 | 2.83031700  | -3.31575100 |
| H | -16.71229900 | 1.46311900  | -2.26946400 |
| H | -19.01307600 | 4.22493300  | -2.99996300 |

|   |              |            |             |
|---|--------------|------------|-------------|
| H | -20.17466000 | 2.89061800 | -2.95129000 |
| H | -20.12537200 | 4.08665900 | -1.64117100 |

# SPRINGS XYZ

| BF <sub>2</sub> |              |             |             |
|-----------------|--------------|-------------|-------------|
| C               | -15.34053000 | -0.52510200 | -3.52776100 |
| C               | -14.94060000 | -1.57839700 | -4.29385200 |
| C               | -13.88846100 | -2.36550100 | -3.71046700 |
| C               | -13.51270600 | -1.87338500 | -2.46051100 |
| S               | -14.45904700 | -0.46190900 | -2.03721100 |
| C               | -12.51955900 | -2.36394900 | -1.51648000 |
| C               | -12.16670300 | -3.65634300 | -1.21461700 |
| C               | -11.14999900 | -3.79126400 | -0.21830800 |
| C               | -10.73230100 | -2.55067000 | 0.26850200  |
| S               | -11.59227700 | -1.25034800 | -0.52339800 |
| C               | -9.75466200  | -2.22340000 | 1.29276400  |
| C               | -9.43887400  | -2.90050200 | 2.44633800  |
| C               | -8.43115100  | -2.28797500 | 3.25359000  |
| C               | -7.97953100  | -1.08754600 | 2.69872500  |
| S               | -8.79995200  | -0.75146100 | 1.19181400  |
| C               | -6.99292800  | -0.13807800 | 3.18418700  |
| C               | -6.68255200  | 0.21484100  | 4.47600800  |
| C               | -5.66020700  | 1.20440600  | 4.60594100  |
| C               | -5.19139800  | 1.63400200  | 3.36161900  |
| S               | -6.01436600  | 0.79879500  | 2.06459200  |
| C               | -4.18704300  | 2.62858300  | 3.02668600  |
| C               | -3.86658000  | 3.79837900  | 3.67384300  |
| C               | -2.82930100  | 4.56647700  | 3.06113900  |
| C               | -2.35855100  | 3.96425900  | 1.89106800  |
| S               | -3.19836400  | 2.46211300  | 1.58312300  |
| C               | -1.34058100  | 4.40077400  | 0.95135800  |
| C               | -0.99897300  | 5.67502100  | 0.56464800  |
| C               | 0.04701500   | 5.75501200  | -0.40512900 |
| C               | 0.50255000   | 4.48929800  | -0.78395200 |
| S               | -0.36218100  | 3.23444300  | 0.07307200  |
| C               | 1.52230300   | 4.10492200  | -1.74419400 |
| C               | 1.87927800   | 4.70931400  | -2.92622100 |
| C               | 2.92140500   | 4.05485400  | -3.65187500 |
| C               | 3.35773100   | 2.89626500  | -3.00365600 |
| S               | 2.48063500   | 2.65000400  | -1.51130500 |
| C               | 4.36582600   | 1.92476300  | -3.39049700 |
| C               | 4.71972500   | 1.48851900  | -4.64519400 |
| C               | 5.74777200   | 0.49691200  | -4.67529500 |
| C               | 6.17622400   | 0.15334300  | -3.39019300 |
| S               | 5.30890200   | 1.06890200  | -2.17927300 |
| C               | 7.17053200   | -0.81268700 | -2.95666300 |
| C               | 7.51137000   | -2.02221500 | -3.51392700 |
| C               | 8.52854900   | -2.74534300 | -2.81855500 |
| C               | 8.96157100   | -2.06569500 | -1.67721100 |

|   |              |             |             |
|---|--------------|-------------|-------------|
| S | 8.11229200   | -0.54814000 | -1.49630600 |
| C | 9.94783800   | -2.43845100 | -0.67772500 |
| C | 10.26198100  | -3.68247200 | -0.18519600 |
| C | 11.27771800  | -3.69712000 | 0.82026100  |
| C | 11.73784300  | -2.41161200 | 1.11286100  |
| S | 10.91476600  | -1.21784500 | 0.13756700  |
| C | 12.73642500  | -1.96437500 | 2.07166500  |
| C | 13.01974200  | -2.45499600 | 3.32461400  |
| C | 14.05293300  | -1.74331500 | 4.01277700  |
| C | 14.54096700  | -0.70011100 | 3.25284500  |
| S | 13.77170100  | -0.58043100 | 1.71916900  |
| H | -16.09673700 | 0.21730200  | -3.74135300 |
| H | -15.36266400 | -1.79958100 | -5.26698900 |
| H | -12.61677600 | -4.51064000 | -1.70066800 |
| H | -9.91075200  | -3.83295500 | 2.72245200  |
| H | -7.16798400  | -0.22924800 | 5.33333800  |
| H | -4.35622000  | 4.11384600  | 4.58429100  |
| H | -1.47855900  | 6.55481200  | 0.96951900  |
| H | 1.41269200   | 5.61762500  | -3.28036000 |
| H | 4.26126200   | 1.87131800  | -5.54598100 |
| H | 7.05078300   | -2.39827000 | -4.41645300 |
| H | 9.78254200   | -4.58612600 | -0.53434700 |
| H | 12.49691800  | -3.29832100 | 3.75422300  |
| H | 15.32199700  | -0.00100400 | 3.52033400  |
| B | 14.56736600  | -2.07053200 | 5.42869600  |
| B | 11.77389100  | -5.04755600 | 1.38321300  |
| B | 9.05829500   | -4.07025400 | -3.41067600 |
| B | 6.28948700   | 0.00888300  | -6.03726000 |
| B | 3.46807100   | 4.70268700  | -4.94339900 |
| B | 0.57725600   | 7.14106500  | -0.83419000 |
| B | -2.32359600  | 5.84860600  | 3.75884300  |
| B | -5.16334300  | 1.60005300  | 6.01399200  |
| B | -7.93282400  | -3.01436400 | 4.52241900  |
| B | -10.60500300 | -5.19422500 | 0.12683100  |
| B | -13.26909800 | -3.53213200 | -4.50678000 |
| F | 15.53772100  | -1.35928700 | 5.99249100  |
| F | 14.05557500  | -3.07241300 | 6.13360000  |
| F | 12.75760900  | -5.17590000 | 2.26596900  |
| F | 11.19672300  | -6.17264200 | 0.97101500  |
| F | 10.06239100  | -4.77197700 | -2.89789700 |
| F | 8.49387600   | -4.55988800 | -4.51075600 |
| F | 7.30425400   | -0.83561400 | -6.18240800 |
| F | 5.72457600   | 0.45389500  | -7.15587300 |
| F | 4.49211500   | 4.22952100  | -5.64444900 |
| F | 2.89823800   | 5.81282300  | -5.40293300 |
| F | 1.60827900   | 7.33040000  | -1.64980000 |
| F | -0.01490900  | 8.23508100  | -0.36427200 |
| F | -1.31253900  | 6.59154000  | 3.32247200  |

|                 |              |             |             |
|-----------------|--------------|-------------|-------------|
| F               | -2.91812500  | 6.25616600  | 4.87625200  |
| F               | -4.15475200  | 2.43243900  | 6.24698600  |
| F               | -5.76219200  | 1.08184600  | 7.08223900  |
| F               | -6.94988400  | -2.57654300 | 5.30175300  |
| F               | -8.50474000  | -4.16038500 | 4.88021000  |
| F               | -9.60001500  | -5.42314600 | 0.96508800  |
| F               | -11.15386000 | -6.26288500 | -0.44394800 |
| F               | -12.25833300 | -4.28206600 | -4.07989900 |
| F               | -13.75505600 | -3.82902700 | -5.71025100 |
| BH <sub>2</sub> |              |             |             |
| C               | 15.81502000  | -1.57924800 | 3.01542000  |
| C               | 15.43209500  | -2.83373500 | 3.37838200  |
| C               | 14.34316600  | -3.37723100 | 2.60475800  |
| C               | 13.94259900  | -2.47358800 | 1.60920500  |
| S               | 14.88499700  | -1.00379800 | 1.66407000  |
| C               | 12.92965100  | -2.64136700 | 0.58350200  |
| C               | 12.59862200  | -3.76893900 | -0.12652800 |
| C               | 11.52632200  | -3.61485200 | -1.06726400 |
| C               | 11.06531800  | -2.28839400 | -1.08791000 |
| S               | 11.92961400  | -1.29167600 | 0.05412700  |
| C               | 10.04585200  | -1.69415300 | -1.92913200 |
| C               | 9.73371200   | -1.97550300 | -3.23747500 |
| C               | 8.65052000   | -1.21646800 | -3.79116100 |
| C               | 8.16023800   | -0.28848800 | -2.85735300 |
| S               | 9.01202200   | -0.39553200 | -1.33844200 |
| C               | 7.12097000   | 0.70659400  | -3.02628700 |
| C               | 6.80177000   | 1.43937200  | -4.14433800 |
| C               | 5.70042400   | 2.34499800  | -3.99560400 |
| C               | 5.20219000   | 2.31643800  | -2.68220600 |
| S               | 6.07018600   | 1.17226100  | -1.69118300 |
| C               | 4.14444700   | 3.11301500  | -2.09489100 |
| C               | 3.80229900   | 4.41846600  | -2.35552000 |
| C               | 2.68919600   | 4.92586500  | -1.60827600 |
| C               | 2.20575300   | 3.95909600  | -0.71081100 |
| S               | 3.10072700   | 2.46621700  | -0.83141900 |
| C               | 1.14364000   | 4.08022300  | 0.26668500  |
| C               | 0.78596400   | 5.17432400  | 1.01775900  |
| C               | -0.32649100  | 4.97999300  | 1.90050400  |
| C               | -0.79333000  | 3.65649200  | 1.83425400  |
| S               | 0.11686400   | 2.71105900  | 0.68423700  |
| C               | -1.85083500  | 3.02935800  | 2.60011000  |
| C               | -2.21286500  | 3.25033900  | 3.90740900  |
| C               | -3.32088800  | 2.47392200  | 4.38063000  |
| C               | -3.77928300  | 1.59598300  | 3.38423200  |
| S               | -2.86660600  | 1.76791000  | 1.90692700  |
| C               | -4.83188300  | 0.60428200  | 3.46574000  |
| C               | -5.19445700  | -0.17934900 | 4.53507200  |
| C               | -6.29917000  | -1.06333700 | 4.30583900  |

|   |              |             |             |
|---|--------------|-------------|-------------|
| C | -6.75445100  | -0.96301600 | 2.98041300  |
| S | -5.84206800  | 0.21753300  | 2.07542100  |
| C | -7.80508200  | -1.71360300 | 2.32411500  |
| C | -8.16970900  | -3.02578200 | 2.50883900  |
| C | -9.27406100  | -3.47723200 | 1.71435900  |
| C | -9.72643400  | -2.45785600 | 0.85995700  |
| S | -8.81194400  | -0.98719000 | 1.07433400  |
| C | -10.77614000 | -2.50977200 | -0.13694200 |
| C | -11.14615800 | -3.55822700 | -0.94471500 |
| C | -12.24711400 | -3.29892000 | -1.82575500 |
| C | -12.69144200 | -1.97335500 | -1.69578100 |
| S | -11.77397700 | -1.10277300 | -0.49488500 |
| C | -13.73703400 | -1.28938100 | -2.43279200 |
| C | -14.08713300 | -1.42248600 | -3.75503500 |
| C | -15.17384700 | -0.58195800 | -4.17667100 |
| C | -15.62291000 | 0.19671800  | -3.12005900 |
| S | -14.76630500 | -0.07956000 | -1.65785200 |
| H | 16.58395100  | -0.95200000 | 3.44468300  |
| H | 15.88605500  | -3.37774400 | 4.19899100  |
| H | 13.11562200  | -4.70991100 | 0.01219100  |
| H | 10.27328700  | -2.71629500 | -3.81342000 |
| H | 7.34962700   | 1.34467400  | -5.07305600 |
| H | 4.34160000   | 5.02528900  | -3.07143300 |
| H | 1.31366200   | 6.11721100  | 0.95320000  |
| H | -1.69171500  | 3.95779900  | 4.53954500  |
| H | -4.67666400  | -0.13662700 | 5.48469100  |
| H | -7.65377200  | -3.67665600 | 3.20299800  |
| H | -10.63664100 | -4.51299200 | -0.92245000 |
| H | -13.56018500 | -2.08466500 | -4.43015000 |
| H | -16.42772500 | 0.92001300  | -3.14099600 |
| B | -15.77859600 | -0.50360000 | -5.58228000 |
| H | -16.68699500 | 0.24177500  | -5.79718400 |
| H | -15.34976200 | -1.18043400 | -6.46796200 |
| B | -12.88605000 | -4.39375800 | -2.68735800 |
| H | -12.33547600 | -5.45006100 | -2.78018000 |
| H | -13.92790600 | -4.23059000 | -3.24061400 |
| B | -9.90946400  | -4.85851900 | 1.90688100  |
| H | -10.95882200 | -5.14278600 | 1.42059500  |
| H | -9.34844500  | -5.66062200 | 2.59194000  |
| B | -6.93230000  | -1.89098000 | 5.42967100  |
| H | -7.98113300  | -2.43868500 | 5.29441300  |
| H | -6.37002600  | -1.96054600 | 6.48155800  |
| B | -3.95361800  | 2.70426300  | 5.75731400  |
| H | -5.00426400  | 2.22890600  | 6.05496200  |
| H | -3.38917100  | 3.40765500  | 6.54097600  |
| B | -0.95391000  | 6.13099500  | 2.69437800  |
| H | -0.38393700  | 7.18018000  | 2.73728000  |
| H | -2.00554600  | 6.01843200  | 3.24198300  |



|    |             |             |             |
|----|-------------|-------------|-------------|
| B  | 2.07703700  | 6.30360200  | -1.88302600 |
| H  | 2.65974300  | 7.06167800  | -2.59948400 |
| H  | 1.02442500  | 6.62620400  | -1.42877200 |
| B  | 5.11364000  | 3.12297500  | -5.17822500 |
| H  | 5.70780800  | 3.13221100  | -6.21476800 |
| H  | 4.06959100  | 3.69122500  | -5.10249600 |
| B  | 8.07001200  | -1.50813800 | -5.17881700 |
| H  | 8.65692900  | -2.25314700 | -5.90558600 |
| H  | 7.03673600  | -1.03859900 | -5.54010600 |
| B  | 10.92682800 | -4.79991000 | -1.83069900 |
| H  | 11.48799000 | -5.85432500 | -1.79455600 |
| H  | 9.90319100  | -4.70832800 | -2.43319100 |
| B  | 13.66645400 | -4.70638500 | 2.94688500  |
| H  | 14.16359900 | -5.41407100 | 3.77264300  |
| H  | 12.64373400 | -5.04352800 | 2.43672900  |
| Br |             |             |             |
| C  | 11.12882100 | 3.32304800  | -6.52073000 |
| C  | 10.68801100 | 4.61397500  | -6.48857500 |
| C  | 10.20596900 | 4.98582600  | -5.20157700 |
| C  | 10.27444000 | 3.98891700  | -4.24856500 |
| S  | 10.97839000 | 2.55096500  | -4.97872500 |
| C  | 9.88318400  | 3.98787200  | -2.85257600 |
| C  | 9.82327400  | 5.04012800  | -1.96681100 |
| C  | 9.39975300  | 4.65197500  | -0.67233900 |
| C  | 9.12633600  | 3.30502900  | -0.52277600 |
| S  | 9.40888200  | 2.49615400  | -2.05878100 |
| C  | 8.68085900  | 2.54836700  | 0.62725500  |
| C  | 8.81855700  | 2.83738100  | 1.96804600  |
| C  | 8.26145600  | 1.84541300  | 2.80962100  |
| C  | 7.68497800  | 0.77272600  | 2.15399600  |
| S  | 7.84756100  | 1.01630200  | 0.41983600  |
| C  | 7.02736300  | -0.41012100 | 2.66417700  |
| C  | 7.15851200  | -1.01968600 | 3.89394600  |
| C  | 6.35428600  | -2.17584700 | 4.02884100  |
| C  | 5.58727200  | -2.49301900 | 2.92206700  |
| S  | 5.88703700  | -1.29855100 | 1.66630500  |
| C  | 4.65696800  | -3.57527900 | 2.68865500  |
| C  | 4.57144900  | -4.80357200 | 3.30967100  |
| C  | 3.52762900  | -5.61164400 | 2.80094900  |
| C  | 2.78340200  | -5.04227300 | 1.78313300  |
| S  | 3.41768400  | -3.43544100 | 1.45159400  |
| C  | 1.65728300  | -5.54775000 | 1.02985300  |
| C  | 1.25661200  | -6.85138200 | 0.82412800  |
| C  | 0.10173900  | -6.95594900 | 0.01374500  |
| C  | -0.41946900 | -5.75339800 | -0.42852200 |
| S  | 0.57566200  | -4.44382400 | 0.19411000  |
| C  | -1.56727300 | -5.46227200 | -1.25849400 |
| C  | -2.20975800 | -6.26918800 | -2.17380800 |

|                  |              |             |             |
|------------------|--------------|-------------|-------------|
| C                | -3.29670800  | -5.62740800 | -2.81276300 |
| C                | -3.52502700  | -4.32157700 | -2.41807300 |
| S                | -2.33290100  | -3.88212000 | -1.20207800 |
| C                | -4.52319800  | -3.36272900 | -2.83767900 |
| C                | -5.23707200  | -3.30569600 | -4.01605000 |
| C                | -6.12404700  | -2.20482700 | -4.07428800 |
| C                | -6.12217500  | -1.38667000 | -2.95923900 |
| S                | -4.96623500  | -2.01979200 | -1.79532200 |
| C                | -6.87815700  | -0.19074100 | -2.65851900 |
| C                | -7.45701700  | 0.71386800  | -3.52267800 |
| C                | -8.11272100  | 1.77614500  | -2.85600900 |
| C                | -8.06020300  | 1.72722900  | -1.47504000 |
| S                | -7.15428500  | 0.29868800  | -0.99427500 |
| C                | -8.60569600  | 2.61507400  | -0.47087100 |
| C                | -8.93459900  | 3.94962600  | -0.57299700 |
| C                | -9.44026200  | 4.48919600  | 0.63482500  |
| C                | -9.51435900  | 3.60193700  | 1.69046000  |
| S                | -8.92671700  | 2.03445100  | 1.15598900  |
| C                | -9.97328500  | 3.78257900  | 3.05382900  |
| C                | -9.97249200  | 4.92453700  | 3.82516700  |
| C                | -10.49447800 | 4.69742300  | 5.12743300  |
| C                | -10.88899900 | 3.41195300  | 5.36374500  |
| S                | -10.64198300 | 2.42943800  | 3.95953500  |
| H                | 11.53988800  | 2.77801900  | -7.35868900 |
| H                | 10.69144200  | 5.28580600  | -7.33697400 |
| H                | 10.07658000  | 6.05769500  | -2.22544200 |
| H                | 9.30595700   | 3.72418500  | 2.34463800  |
| H                | 7.81133000   | -0.66156900 | 4.67586300  |
| H                | 5.23344000   | -5.12608200 | 4.09921100  |
| H                | 1.76978300   | -7.71010800 | 1.23006200  |
| H                | -1.91492600  | -7.28473100 | -2.39169400 |
| H                | -5.13073800  | -4.01938900 | -4.81933000 |
| H                | -7.41277400  | 0.63100200  | -4.59842000 |
| H                | -8.81690400  | 4.53202000  | -1.47468400 |
| H                | -9.60357800  | 5.88154600  | 3.48642600  |
| H                | -11.30990100 | 2.99274300  | 6.26515500  |
| Br               | 9.49736200   | 6.72038800  | -4.90918000 |
| Br               | 9.21708400   | 5.95689900  | 0.69216900  |
| Br               | 8.31683100   | 2.06657800  | 4.69257500  |
| Br               | 6.36531900   | -3.14507000 | 5.65923900  |
| Br               | 3.22235300   | -7.32989200 | 3.54447500  |
| Br               | -0.63426800  | -8.66363300 | -0.36099800 |
| Br               | -4.33506100  | -6.57581800 | -4.08561000 |
| Br               | -7.22817500  | -1.96072400 | -5.59729400 |
| Br               | -9.00453000  | 3.11426800  | -3.86220100 |
| Br               | -9.98702800  | 6.30422900  | 0.70824400  |
| Br               | -10.61663200 | 6.07458700  | 6.42674000  |
| CBr <sub>3</sub> |              |             |             |

|   |              |             |             |
|---|--------------|-------------|-------------|
| C | -18.03543100 | 0.82443700  | 1.53000600  |
| C | -17.63945600 | 2.12425400  | 1.43136400  |
| C | -16.42316200 | 2.29865000  | 0.69076200  |
| C | -15.92728700 | 1.09055500  | 0.20804900  |
| S | -16.95565900 | -0.23470400 | 0.70013800  |
| C | -14.76418200 | 0.78163800  | -0.61761300 |
| C | -14.40289800 | 1.32202300  | -1.82335000 |
| C | -13.18210500 | 0.81068900  | -2.35794500 |
| C | -12.63093600 | -0.18478600 | -1.55246400 |
| S | -13.60685000 | -0.42889700 | -0.12481300 |
| C | -11.45151400 | -1.02361000 | -1.72156800 |
| C | -11.06740000 | -1.74557600 | -2.82079400 |
| C | -9.83724700  | -2.45228500 | -2.66695000 |
| C | -9.30139300  | -2.30156100 | -1.38642600 |
| S | -10.30519600 | -1.24403800 | -0.42294100 |
| C | -8.12245600  | -2.87170300 | -0.75272800 |
| C | -7.64925800  | -4.15579800 | -0.82547900 |
| C | -6.43746600  | -4.38428100 | -0.10904600 |
| C | -6.01752600  | -3.25098500 | 0.58894400  |
| S | -7.09189200  | -1.90718500 | 0.27906100  |
| C | -4.91159300  | -3.03746000 | 1.50853900  |
| C | -4.46567300  | -3.86585900 | 2.50509500  |
| C | -3.32054900  | -3.38700000 | 3.20703300  |
| C | -2.93276600  | -2.11766600 | 2.77631200  |
| S | -3.94668200  | -1.58083300 | 1.45695200  |
| C | -1.90388700  | -1.20884200 | 3.25636000  |
| C | -1.57949000  | -0.90708400 | 4.55334000  |
| C | -0.48945300  | 0.00106800  | 4.69652300  |
| C | -0.01854700  | 0.45523000  | 3.46382000  |
| S | -0.88860300  | -0.30963100 | 2.15445200  |
| C | 1.00086200   | 1.43449300  | 3.12139400  |
| C | 1.22562800   | 2.66022700  | 3.69184200  |
| C | 2.33900200   | 3.37034200  | 3.15299500  |
| C | 2.93359800   | 2.68741900  | 2.09105400  |
| S | 2.14570500   | 1.14873600  | 1.83229200  |
| C | 4.02288600   | 3.05070400  | 1.19839700  |
| C | 4.25861100   | 4.25856200  | 0.59525100  |
| C | 5.44852400   | 4.30687700  | -0.18911000 |
| C | 6.09581400   | 3.07238400  | -0.24004000 |
| S | 5.25799100   | 1.89877800  | 0.74821900  |
| C | 7.26774400   | 2.62650800  | -0.97830100 |
| C | 7.58428300   | 2.86406500  | -2.29059800 |
| C | 8.82674500   | 2.30359000  | -2.71009400 |
| C | 9.44022900   | 1.56558400  | -1.69793400 |
| S | 8.49717900   | 1.63720800  | -0.22843300 |
| C | 10.65566100  | 0.76464200  | -1.68668600 |
| C | 11.07306300  | -0.15737600 | -2.61020000 |
| C | 12.33494500  | -0.75677000 | -2.31882400 |

|    |              |             |             |
|----|--------------|-------------|-------------|
| C  | 12.85847600  | -0.31580700 | -1.10409900 |
| S  | 11.80959200  | 0.87844400  | -0.37933900 |
| C  | 14.06652200  | -0.69125800 | -0.38368400 |
| C  | 14.55585400  | -1.94524000 | -0.13384800 |
| C  | 15.80307600  | -1.93624800 | 0.56496800  |
| C  | 16.23105400  | -0.66761200 | 0.86415600  |
| S  | 15.14217400  | 0.53374500  | 0.27957000  |
| H  | -18.89928800 | 0.43119800  | 2.04689500  |
| H  | -18.17588300 | 2.94581300  | 1.88345100  |
| H  | -14.98509100 | 2.09158300  | -2.30589400 |
| H  | -11.64397100 | -1.75333000 | -3.73269400 |
| H  | -8.14965900  | -4.92191300 | -1.39702600 |
| H  | -4.93616300  | -4.81289100 | 2.72028700  |
| H  | -2.09866200  | -1.34439300 | 5.39228400  |
| H  | 0.61764600   | 3.03887400  | 4.49901600  |
| H  | 3.60375700   | 5.10600400  | 0.72752500  |
| H  | 6.95001500   | 3.44742900  | -2.94021400 |
| H  | 10.49860400  | -0.38736300 | -3.49442500 |
| H  | 14.05358800  | -2.85014500 | -0.44792400 |
| H  | 17.13410400  | -0.38472900 | 1.38353000  |
| C  | 16.55521000  | -3.19818600 | 0.83433000  |
| C  | 12.94947400  | -1.76776300 | -3.25018800 |
| C  | 9.34988400   | 2.51799100  | -4.10544700 |
| C  | 5.89040600   | 5.58335200  | -0.85397400 |
| C  | 2.75762900   | 4.70165400  | 3.71873200  |
| C  | 0.03078700   | 0.38046000  | 6.05768600  |
| C  | -2.66487100  | -4.21859700 | 4.27739400  |
| C  | -5.75713700  | -5.72749400 | -0.14830900 |
| C  | -9.25907800  | -3.26355400 | -3.79613700 |
| C  | -12.61564400 | 1.31836900  | -3.65684900 |
| C  | -15.80397500 | 3.65097000  | 0.46802300  |
| Br | 15.41441500  | -4.49176500 | 1.80386200  |
| Br | 17.06965700  | -4.02520200 | -0.89593700 |
| Br | 18.18647600  | -2.91590400 | 1.88793500  |
| Br | 12.49030000  | -3.61445900 | -2.65330300 |
| Br | 12.24863600  | -1.57799500 | -5.09136000 |
| Br | 14.90814000  | -1.64492200 | -3.40465400 |
| Br | 8.90089300   | 0.96184900  | -5.26860400 |
| Br | 11.29646800  | 2.80617200  | -4.18441700 |
| Br | 8.53291000   | 4.10743400  | -4.95429000 |
| Br | 7.83959600   | 5.86192700  | -0.81866700 |
| Br | 5.10372700   | 7.16910700  | 0.03001800  |
| Br | 5.28636600   | 5.63059500  | -2.75287800 |
| Br | 4.70852600   | 4.95696800  | 3.80379600  |
| Br | 1.97954000   | 6.19207800  | 2.64586000  |
| Br | 2.10424700   | 4.93940300  | 5.57101400  |
| Br | 1.99016100   | 0.55506500  | 6.14411500  |
| Br | -0.44922900  | -0.97179800 | 7.41987700  |

|     |              |             |             |
|-----|--------------|-------------|-------------|
| Br  | -0.77668900  | 2.10279800  | 6.65785400  |
| Br  | -0.69960600  | -4.10117200 | 4.28865500  |
| Br  | -3.08687200  | -6.13949600 | 4.05860000  |
| Br  | -3.33307300  | -3.69061000 | 6.08078900  |
| Br  | -3.79106400  | -5.63020100 | -0.20608900 |
| Br  | -6.28961600  | -6.76112400 | -1.74848100 |
| Br  | -6.28127500  | -6.82033400 | 1.43531100  |
| Br  | -7.30109400  | -3.12627700 | -3.95647300 |
| Br  | -9.98343700  | -2.70385300 | -5.54976000 |
| Br  | -9.73475400  | -5.19012200 | -3.58305800 |
| Br  | -10.65738600 | 1.53092000  | -3.62617700 |
| Br  | -13.34782700 | 3.09033400  | -4.13917500 |
| Br  | -13.08800900 | 0.08893700  | -5.15506200 |
| Br  | -13.84212400 | 3.65071200  | 0.65991800  |
| Br  | -16.47574000 | 5.00314300  | 1.74632400  |
| Br  | -16.25239800 | 4.34093300  | -1.34952900 |
| CCH |              |             |             |
| C   | 6.44680500   | -5.77734600 | 6.32514500  |
| C   | 6.58217300   | -6.96816700 | 5.67871500  |
| C   | 6.96145100   | -6.82852000 | 4.30041600  |
| C   | 7.11393900   | -5.49374000 | 3.92068700  |
| S   | 6.79504800   | -4.43782800 | 5.28138700  |
| C   | 7.48478400   | -4.95064500 | 2.63129200  |
| C   | 8.13583700   | -5.56914400 | 1.58939200  |
| C   | 8.34726300   | -4.73328800 | 0.45167900  |
| C   | 7.85080100   | -3.43738700 | 0.62758000  |
| S   | 7.11825800   | -3.28421400 | 2.20949900  |
| C   | 7.87688100   | -2.31721800 | -0.28282500 |
| C   | 8.61959300   | -2.15173300 | -1.43153000 |
| C   | 8.40317000   | -0.90877600 | -2.09560300 |
| C   | 7.47398600   | -0.09321800 | -1.43967100 |
| S   | 6.88010000   | -0.89534400 | -0.00220900 |
| C   | 6.99803200   | 1.22074500  | -1.79847200 |
| C   | 7.52006100   | 2.11170200  | -2.71134500 |
| C   | 6.79593400   | 3.33497700  | -2.81656600 |
| C   | 5.69042500   | 3.39126600  | -1.95964200 |
| S   | 5.57030700   | 1.90981500  | -1.03609100 |
| C   | 4.72660800   | 4.44967200  | -1.78016800 |
| C   | 4.79426000   | 5.76223000  | -2.19549300 |
| C   | 3.65743500   | 6.54719400  | -1.84483000 |
| C   | 2.69083000   | 5.82335700  | -1.13679300 |
| S   | 3.21687100   | 4.16834100  | -0.92208700 |
| C   | 1.41937500   | 6.26423500  | -0.61708100 |
| C   | 0.95714800   | 7.54983200  | -0.43473900 |
| C   | -0.35782600  | 7.62831800  | 0.10936700  |
| C   | -0.92273700  | 6.37148500  | 0.35775600  |
| S   | 0.19938600   | 5.10819000  | -0.09779500 |
| C   | -2.21984400  | 6.04346400  | 0.89684800  |

|   |              |              |             |
|---|--------------|--------------|-------------|
| C | -3.12658600  | 6.86403600   | 1.53291600  |
| C | -4.32293100  | 6.20805700   | 1.94474100  |
| C | -4.33820100  | 4.84546100   | 1.62284800  |
| S | -2.85434700  | 4.40514300   | 0.80615400  |
| C | -5.36151900  | 3.85923300   | 1.86885800  |
| C | -6.46812300  | 3.94287100   | 2.68661200  |
| C | -7.27908100  | 2.77091900   | 2.69773900  |
| C | -6.78358900  | 1.75490200   | 1.87152200  |
| S | -5.30998000  | 2.28296300   | 1.08927600  |
| C | -7.31767700  | 0.43876100   | 1.61950900  |
| C | -8.30922100  | -0.23907500  | 2.29574800  |
| C | -8.59184100  | -1.53621200  | 1.77638900  |
| C | -7.79505500  | -1.86991700  | 0.67511200  |
| S | -6.70398800  | -0.55369800  | 0.30285000  |
| C | -7.78466300  | -3.07858200  | -0.11397400 |
| C | -8.36384800  | -4.29787700  | 0.16262700  |
| C | -8.15629200  | -5.28613000  | -0.84514300 |
| C | -7.39509900  | -4.81809200  | -1.91916200 |
| S | -6.94489800  | -3.14899700  | -1.65836800 |
| C | -6.97966100  | -5.51618500  | -3.11687800 |
| C | -6.87016500  | -6.87259700  | -3.32709600 |
| C | -6.41952900  | -7.21450300  | -4.64328700 |
| C | -6.18783300  | -6.09853100  | -5.42121300 |
| S | -6.52759900  | -4.63617500  | -4.57479400 |
| H | 6.16785900   | -5.59982000  | 7.35402500  |
| H | 6.41535800   | -7.93296400  | 6.14148800  |
| H | 8.46606700   | -6.59764400  | 1.62641600  |
| H | 9.31177500   | -2.89539400  | -1.79941400 |
| H | 8.40510300   | 1.90699900   | -3.29636300 |
| H | 5.63705400   | 6.16731200   | -2.73678700 |
| H | 1.54042000   | 8.42659700   | -0.67683600 |
| H | -2.94834200  | 7.91476200   | 1.71053500  |
| H | -6.70300100  | 4.81826900   | 3.27469900  |
| H | -8.82869900  | 0.17159200   | 3.14945100  |
| H | -8.92582000  | -4.49406300  | 1.06436000  |
| H | -7.08874200  | -7.60875700  | -2.56665500 |
| H | -5.84243600  | -6.07174600  | -6.44449500 |
| C | -6.22314200  | -8.55128000  | -5.09393500 |
| C | -6.05932200  | -9.68980900  | -5.46885300 |
| H | -5.91255700  | -10.69110000 | -5.80161700 |
| C | -8.70327100  | -6.59443100  | -0.73604100 |
| C | -9.18761200  | -7.69585300  | -0.60093100 |
| H | -9.61609400  | -8.66557900  | -0.49478700 |
| C | -9.60084800  | -2.36054300  | 2.34539900  |
| C | -10.47048200 | -3.02368100  | 2.86551800  |
| H | -11.23858800 | -3.61130100  | 3.31278300  |
| C | -8.46756600  | 2.69791700   | 3.47448000  |
| C | -9.47071500  | 2.68641300   | 4.15286000  |

|                  |              |             |             |
|------------------|--------------|-------------|-------------|
| H                | -10.35838400 | 2.67029900  | 4.74203400  |
| C                | -5.36932100  | 6.91419800  | 2.59852300  |
| C                | -6.23102600  | 7.56096100  | 3.15151800  |
| H                | -6.99679400  | 8.12415500  | 3.63294200  |
| C                | -0.99136200  | 8.87934400  | 0.34318200  |
| C                | -1.48682100  | 9.96963500  | 0.52321300  |
| H                | -1.93252800  | 10.92492600 | 0.67851300  |
| C                | 3.55585300   | 7.91633700  | -2.21401600 |
| C                | 3.51617600   | 9.07856900  | -2.55193400 |
| H                | 3.47029800   | 10.09999700 | -2.85182400 |
| C                | 7.18806800   | 4.35535000  | -3.72553600 |
| C                | 7.56192900   | 5.19374100  | -4.51541300 |
| H                | 7.88023700   | 5.93350200  | -5.21311800 |
| C                | 9.07576200   | -0.58532200 | -3.30560900 |
| C                | 9.67303300   | -0.35717600 | -4.33412000 |
| H                | 10.18910700  | -0.15176400 | -5.24341600 |
| C                | 8.99034900   | -5.21939400 | -0.71910400 |
| C                | 9.54317700   | -5.68101800 | -1.69276700 |
| H                | 10.02238700  | -6.08152600 | -2.55605900 |
| C                | 7.12509900   | -7.95246200 | 3.44672000  |
| C                | 7.25339000   | -8.94129300 | 2.75917800  |
| H                | 7.35889200   | -9.80412400 | 2.14303200  |
| CCl <sub>3</sub> |              |             |             |
| C                | -18.87648400 | -1.36434500 | -1.81915900 |
| C                | -18.59912400 | -2.44193400 | -1.03160800 |
| C                | -17.39233500 | -2.29537400 | -0.27264500 |
| C                | -16.77909400 | -1.06698600 | -0.48577000 |
| S                | -17.69033900 | -0.12531100 | -1.64379100 |
| C                | -15.58036700 | -0.45584300 | 0.08885700  |
| C                | -15.29349200 | -0.18481200 | 1.40199600  |
| C                | -14.02867800 | 0.44630400  | 1.60421300  |
| C                | -13.35909800 | 0.69334200  | 0.41131200  |
| S                | -14.28860700 | 0.10344000  | -0.94269900 |
| C                | -12.08416700 | 1.34927500  | 0.12034200  |
| C                | -11.68253000 | 2.62635600  | 0.41693700  |
| C                | -10.36860000 | 2.94554800  | -0.04140700 |
| C                | -9.77578400  | 1.89557300  | -0.73401400 |
| S                | -10.84148900 | 0.51437800  | -0.77635700 |
| C                | -8.48590600  | 1.77028800  | -1.41207500 |
| C                | -7.96419300  | 2.53180200  | -2.42612600 |
| C                | -6.67587300  | 2.10659500  | -2.87076700 |
| C                | -6.22822600  | 0.97273200  | -2.20205100 |
| S                | -7.39377800  | 0.47126400  | -1.00406300 |
| C                | -5.01657100  | 0.16513700  | -2.34031100 |
| C                | -4.53647000  | -0.49267500 | -3.44349000 |
| C                | -3.32515100  | -1.21234500 | -3.21165800 |
| C                | -2.89857400  | -1.12709100 | -1.89077000 |
| S                | -3.98501200  | -0.12501700 | -0.96279700 |

|   |              |             |             |
|---|--------------|-------------|-------------|
| C | -1.76441800  | -1.71972100 | -1.18286400 |
| C | -1.41909300  | -3.04035200 | -1.05184600 |
| C | -0.25208500  | -3.26266900 | -0.26012200 |
| C | 0.27795200   | -2.08281600 | 0.25200800  |
| S | -0.65747500  | -0.71105200 | -0.28664500 |
| C | 1.41348700   | -1.81181700 | 1.13209200  |
| C | 1.68592000   | -2.31576500 | 2.37831200  |
| C | 2.88057900   | -1.80145600 | 2.96707700  |
| C | 3.50726900   | -0.85535300 | 2.16329800  |
| S | 2.62926400   | -0.64717300 | 0.66951000  |
| C | 4.70098100   | -0.03367000 | 2.35881600  |
| C | 4.98685600   | 0.84982900  | 3.36798700  |
| C | 6.24391100   | 1.51143000  | 3.22432600  |
| C | 6.90808700   | 1.14782000  | 2.05824300  |
| S | 5.98410300   | -0.04022300 | 1.17520300  |
| C | 8.17169400   | 1.59078600  | 1.46968200  |
| C | 8.55748000   | 2.85626200  | 1.10920700  |
| C | 9.86203600   | 2.92591300  | 0.53332000  |
| C | 10.46322400  | 1.67690400  | 0.42135200  |
| S | 9.41711100   | 0.43707600  | 1.06519500  |
| C | 11.74826400  | 1.25029600  | -0.13140600 |
| C | 12.24827200  | 1.43056700  | -1.39534200 |
| C | 13.53923500  | 0.85517700  | -1.59845700 |
| C | 14.01148300  | 0.19110000  | -0.47167100 |
| S | 12.86422900  | 0.32014100  | 0.83665300  |
| C | 15.23390800  | -0.57201000 | -0.22061100 |
| C | 15.71385900  | -1.67783500 | -0.87146500 |
| C | 16.92650300  | -2.18357500 | -0.30444600 |
| C | 17.34686000  | -1.45609400 | 0.77903600  |
| S | 16.28483900  | -0.14401700 | 1.12266600  |
| H | -19.70976700 | -1.23377400 | -2.49498900 |
| H | -19.22093400 | -3.32478000 | -0.99632000 |
| H | -15.96845000 | -0.43890800 | 2.20522500  |
| H | -12.30912800 | 3.31806300  | 0.95923300  |
| H | -8.48665100  | 3.38204300  | -2.83749000 |
| H | -5.03342900  | -0.45503500 | -4.40114500 |
| H | -1.98208100  | -3.83414700 | -1.51890500 |
| H | 1.04968400   | -3.04309100 | 2.85948700  |
| H | 4.31692800   | 1.01725800  | 4.19776100  |
| H | 7.92590800   | 3.71836300  | 1.26166000  |
| H | 11.70907400  | 1.96998800  | -2.15918500 |
| H | 15.21698500  | -2.12421900 | -1.72190200 |
| H | 18.22251800  | -1.62019100 | 1.38835600  |
| C | 17.62420800  | -3.39243100 | -0.86564400 |
| C | 14.26074900  | 0.94715100  | -2.92740500 |
| C | 10.46847600  | 4.23587500  | 0.07332300  |
| C | 6.73784000   | 2.52488900  | 4.23656300  |
| C | 3.35126700   | -2.23974000 | 4.33901700  |



|                 |              |             |             |
|-----------------|--------------|-------------|-------------|
| C               | 0.28772800   | -4.65481900 | -0.00224500 |
| C               | -2.63977400  | -2.00297900 | -4.30743100 |
| C               | -5.93481700  | 2.82007900  | -3.98321400 |
| C               | -9.74562900  | 4.30717200  | 0.19016100  |
| C               | -13.52922400 | 0.82452000  | 2.98360800  |
| C               | -16.89424900 | -3.37113300 | 0.66818900  |
| Cl              | 16.50807000  | -4.82616800 | -0.82621600 |
| Cl              | 18.09163700  | -3.09476300 | -2.59310100 |
| Cl              | 19.11294400  | -3.81541900 | 0.05730300  |
| Cl              | 16.02172900  | 1.28715300  | -2.73044900 |
| Cl              | 14.06500400  | -0.61142000 | -3.85617500 |
| Cl              | 13.58465100  | 2.26834200  | -3.96197700 |
| Cl              | 10.29905400  | 4.40403800  | -1.73566700 |
| Cl              | 9.63107900   | 5.65521700  | 0.81832000  |
| Cl              | 12.21529500  | 4.37351300  | 0.50677400  |
| Cl              | 8.50339100   | 2.35762300  | 4.57231700  |
| Cl              | 6.41415100   | 4.21681800  | 3.63540900  |
| Cl              | 5.88505800   | 2.35092500  | 5.82159400  |
| Cl              | 5.13963000   | -2.47349500 | 4.41022400  |
| Cl              | 2.87255500   | -0.99990700 | 5.58937900  |
| Cl              | 2.59876800   | -3.80830500 | 4.83010200  |
| Cl              | 2.08902000   | -4.72163400 | -0.09334900 |
| Cl              | -0.23798900  | -5.23336900 | 1.64698000  |
| Cl              | -0.34169700  | -5.84712700 | -1.20707600 |
| Cl              | -0.84431700  | -1.82496400 | -4.26483700 |
| Cl              | -3.17897000  | -1.47107800 | -5.94896000 |
| Cl              | -3.05684900  | -3.77300700 | -4.15329800 |
| Cl              | -4.16939000  | 2.97872000  | -3.64244300 |
| Cl              | -6.57022400  | 4.49325400  | -4.23940300 |
| Cl              | -6.14896900  | 1.91762400  | -5.55448300 |
| Cl              | -8.00394300  | 4.19527900  | 0.65190300  |
| Cl              | -10.58272500 | 5.20648900  | 1.51617000  |
| Cl              | -9.88661400  | 5.32482900  | -1.31830700 |
| Cl              | -11.77094800 | 0.47203800  | 3.19665300  |
| Cl              | -14.40541200 | -0.08005300 | 4.28047100  |
| Cl              | -13.80923700 | 2.60199800  | 3.28618600  |
| Cl              | -15.10574300 | -3.60114800 | 0.57015700  |
| Cl              | -17.33484700 | -2.95584200 | 2.38949100  |
| Cl              | -17.64680700 | -4.97711100 | 0.30234900  |
| CF <sub>3</sub> |              |             |             |
| C               | -14.96936500 | -0.94338500 | -4.24617500 |
| C               | -14.46271100 | -1.98310800 | -4.97112200 |
| C               | -13.43773600 | -2.69431600 | -4.28025500 |
| C               | -13.17531600 | -2.19246400 | -3.01556200 |
| S               | -14.21939300 | -0.82413600 | -2.69267600 |
| C               | -12.22692000 | -2.63834800 | -2.00719600 |
| C               | -11.82814200 | -3.91868000 | -1.69939900 |
| C               | -10.87473200 | -3.98248700 | -0.65074600 |

|   |              |             |             |
|---|--------------|-------------|-------------|
| C | -10.54069100 | -2.74338700 | -0.12228000 |
| S | -11.41966600 | -1.48616300 | -0.96276500 |
| C | -9.63199400  | -2.39205600 | 0.95436900  |
| C | -9.31399900  | -3.10422700 | 2.08940800  |
| C | -8.38053500  | -2.44824400 | 2.93099500  |
| C | -7.98013400  | -1.20478900 | 2.46167200  |
| S | -8.76977200  | -0.86534200 | 0.93866000  |
| C | -7.06568400  | -0.23293300 | 3.03319800  |
| C | -6.81937800  | 0.05236700  | 4.35786600  |
| C | -5.85500300  | 1.07309800  | 4.55141400  |
| C | -5.35663100  | 1.60454900  | 3.36923300  |
| S | -6.09535900  | 0.80152700  | 2.00255100  |
| C | -4.37870000  | 2.65369100  | 3.14750500  |
| C | -4.10926700  | 3.76496800  | 3.91536200  |
| C | -3.07561200  | 4.58217900  | 3.39357400  |
| C | -2.54354600  | 4.11798900  | 2.19731100  |
| S | -3.34188800  | 2.63219000  | 1.73386400  |
| C | -1.49223700  | 4.66143100  | 1.35760800  |
| C | -1.11825200  | 5.97404900  | 1.16940800  |
| C | -0.03548600  | 6.13553700  | 0.26934500  |
| C | 0.43012000   | 4.94234500  | -0.26814800 |
| S | -0.49202400  | 3.60453500  | 0.37889600  |
| C | 1.49484600   | 4.68719900  | -1.22036900 |
| C | 1.95512300   | 5.48450400  | -2.24536600 |
| C | 3.01516500   | 4.90538600  | -2.98644200 |
| C | 3.37543600   | 3.63629400  | -2.55228900 |
| S | 2.38387800   | 3.17581500  | -1.18736400 |
| C | 4.38428100   | 2.72004600  | -3.05099300 |
| C | 4.84745300   | 2.55574900  | -4.33789400 |
| C | 5.84149300   | 1.55315000  | -4.46246700 |
| C | 6.14499200   | 0.91307900  | -3.26824800 |
| S | 5.18437900   | 1.59141200  | -1.97350200 |
| C | 7.07808300   | -0.16212200 | -2.98629400 |
| C | 7.46298800   | -1.21000300 | -3.79296300 |
| C | 8.39524100   | -2.08634000 | -3.18265700 |
| C | 8.72865300   | -1.73269400 | -1.88190100 |
| S | 7.87477900   | -0.27548400 | -1.42846100 |
| C | 9.62000700   | -2.37053500 | -0.93003100 |
| C | 9.91253700   | -3.70751400 | -0.77821200 |
| C | 10.83284500  | -3.97339800 | 0.26759200  |
| C | 11.24755200  | -2.83973100 | 0.95055600  |
| S | 10.48865200  | -1.42316000 | 0.26319700  |
| C | 12.15631300  | -2.69798200 | 2.07680000  |
| C | 12.34185800  | -3.54116500 | 3.14800000  |
| C | 13.30962600  | -3.05582900 | 4.07252700  |
| C | 13.85023300  | -1.85113100 | 3.71208200  |
| S | 13.19959200  | -1.28728400 | 2.21857700  |
| H | -15.73782800 | -0.23940900 | -4.53223800 |

|   |              |             |             |
|---|--------------|-------------|-------------|
| H | -14.78582900 | -2.23603700 | -5.97225300 |
| H | -12.20083800 | -4.79377200 | -2.21131200 |
| H | -9.73254600  | -4.07290300 | 2.31877000  |
| H | -7.31144400  | -0.45346400 | 5.17539300  |
| H | -4.63260900  | 3.99391200  | 4.83169100  |
| H | -1.60083100  | 6.80553200  | 1.66088300  |
| H | 1.54896000   | 6.45991200  | -2.46760200 |
| H | 4.49010700   | 3.13486500  | -5.17630500 |
| H | 7.09201800   | -1.35371100 | -4.79692200 |
| H | 9.48511700   | -4.48310700 | -1.39612500 |
| H | 11.79393700  | -4.46391800 | 3.27942600  |
| H | 14.59440200  | -1.27661100 | 4.24375300  |
| C | 13.68778200  | -3.79457500 | 5.31839800  |
| C | 11.28687400  | -5.37340700 | 0.56856700  |
| C | 8.94094500   | -3.27675600 | -3.91886700 |
| C | 6.48061800   | 1.25378700  | -5.78874300 |
| C | 3.65813900   | 5.64168500  | -4.12728600 |
| C | 0.52621800   | 7.49578600  | -0.03290900 |
| C | -2.62943900  | 5.82289300  | 4.11345400  |
| C | -5.44333300  | 1.50113200  | 5.93154000  |
| C | -7.89716000  | -3.08494400 | 4.20281500  |
| C | -10.31019000 | -5.29665000 | -0.19162300 |
| C | -12.72940700 | -3.85896700 | -4.90776400 |
| F | -11.38943700 | -3.78059200 | -4.78053000 |
| F | -13.00835400 | -3.94227500 | -6.22534100 |
| F | -13.10624300 | -5.04253300 | -4.35327400 |
| F | -10.63554100 | -6.28736600 | -1.04497900 |
| F | -8.96618600  | -5.27261700 | -0.08629200 |
| F | -10.79174900 | -5.65590500 | 1.02927100  |
| F | -8.26146700  | -4.38072000 | 4.26446500  |
| F | -8.41842900  | -2.47796500 | 5.30286600  |
| F | -6.55599600  | -3.03044200 | 4.32780400  |
| F | -5.93117500  | 2.73148600  | 6.24653600  |
| F | -5.91099100  | 0.64675800  | 6.86247100  |
| F | -4.10424500  | 1.56691400  | 6.07265200  |
| F | -3.17030200  | 5.88856600  | 5.34556900  |
| F | -1.28963500  | 5.88422400  | 4.25113000  |
| F | -3.00816300  | 6.95300200  | 3.45782500  |
| F | 0.02777100   | 8.42268300  | 0.80830600  |
| F | 1.87001300   | 7.53098900  | 0.06962700  |
| F | 0.21902400   | 7.90383500  | -1.29384000 |
| F | 3.26566700   | 6.93050900  | -4.15401800 |
| F | 3.32207100   | 5.10395600  | -5.33072300 |
| F | 5.00427300   | 5.62514300  | -4.05664900 |
| F | 6.16401600   | 2.19455900  | -6.70011800 |
| F | 6.06490900   | 0.06170600  | -6.29487100 |
| F | 7.82508500   | 1.19545300  | -5.71076400 |
| F | 8.62396000   | -3.22338200 | -5.22772100 |

|                 |              |             |             |
|-----------------|--------------|-------------|-------------|
| F               | 10.28241500  | -3.36959300 | -3.82642300 |
| F               | 8.43340700   | -4.44408200 | -3.43883500 |
| F               | 10.91636500  | -6.22178100 | -0.41161300 |
| F               | 10.74219600  | -5.84562000 | 1.72180700  |
| F               | 12.62436200  | -5.46384100 | 0.70370000  |
| F               | 14.27084400  | -4.98029300 | 5.03617500  |
| F               | 12.60252400  | -4.06548900 | 6.07766800  |
| F               | 14.55163200  | -3.08508400 | 6.07465300  |
| CH <sub>3</sub> |              |             |             |
| C               | -15.44447700 | -0.97990500 | -3.72559400 |
| C               | -14.93573100 | -2.01272300 | -4.45986200 |
| C               | -13.86494100 | -2.71035900 | -3.81673900 |
| C               | -13.57758000 | -2.18216300 | -2.56904200 |
| S               | -14.63894000 | -0.82853000 | -2.20167000 |
| C               | -12.57079300 | -2.60478700 | -1.61020100 |
| C               | -12.13652800 | -3.87932100 | -1.31915700 |
| C               | -11.11547400 | -3.95406700 | -0.32843400 |
| C               | -10.76918300 | -2.70431900 | 0.16190800  |
| S               | -11.70474200 | -1.44171500 | -0.62495500 |
| C               | -9.78926200  | -2.36326900 | 1.17599900  |
| C               | -9.42037400  | -3.07553300 | 2.29751200  |
| C               | -8.41014000  | -2.46314800 | 3.09200400  |
| C               | -8.00264700  | -1.24295300 | 2.57347000  |
| S               | -8.86976100  | -0.87213400 | 1.09086200  |
| C               | -7.00877900  | -0.32095500 | 3.08865800  |
| C               | -6.66619600  | -0.06039200 | 4.39896000  |
| C               | -5.62975200  | 0.90040100  | 4.56864500  |
| C               | -5.17390600  | 1.39997700  | 3.35752500  |
| S               | -6.02923900  | 0.65895600  | 2.01332000  |
| C               | -4.14194200  | 2.38855100  | 3.11101300  |
| C               | -3.78266600  | 3.47598900  | 3.87962600  |
| C               | -2.70887200  | 4.25114200  | 3.35808000  |
| C               | -2.24013900  | 3.75340800  | 2.15091300  |
| S               | -3.13083700  | 2.31398700  | 1.67978700  |
| C               | -1.16986900  | 4.25676400  | 1.31222200  |
| C               | -0.75496500  | 5.55879600  | 1.12409800  |
| C               | 0.34591200   | 5.71560600  | 0.23578100  |
| C               | 0.77985900   | 4.50369000  | -0.28174900 |
| S               | -0.17813800  | 3.17421900  | 0.35257700  |
| C               | 1.86099200   | 4.24419800  | -1.21233500 |
| C               | 2.33857600   | 5.04059100  | -2.23257200 |
| C               | 3.43008700   | 4.49111200  | -2.96220100 |
| C               | 3.79176000   | 3.23446600  | -2.49920100 |
| S               | 2.77924900   | 2.75102800  | -1.14702800 |
| C               | 4.83847200   | 2.35270700  | -2.97803600 |
| C               | 5.32386900   | 2.19919800  | -4.26002900 |
| C               | 6.37009000   | 1.24360400  | -4.39514200 |
| C               | 6.68779500   | 0.63861900  | -3.18800800 |

|   |              |             |             |
|---|--------------|-------------|-------------|
| S | 5.69138900   | 1.27516900  | -1.88811400 |
| C | 7.67958000   | -0.38346000 | -2.91408800 |
| C | 8.11463400   | -1.40838700 | -3.72794400 |
| C | 9.11402700   | -2.24571900 | -3.15608500 |
| C | 9.44515000   | -1.86120200 | -1.86554300 |
| S | 8.52132400   | -0.44899200 | -1.37655500 |
| C | 10.40074300  | -2.46000900 | -0.95284200 |
| C | 10.74886600  | -3.78657800 | -0.81327800 |
| C | 11.73576300  | -4.04602600 | 0.18093800  |
| C | 12.14439400  | -2.89106000 | 0.82763500  |
| S | 11.31039700  | -1.48441700 | 0.18663300  |
| C | 13.11556100  | -2.74008700 | 1.89801100  |
| C | 13.36962100  | -3.58270400 | 2.95741400  |
| C | 14.40438200  | -3.13051800 | 3.83623300  |
| C | 14.92419500  | -1.93047100 | 3.42846600  |
| S | 14.18459200  | -1.34538800 | 1.97304300  |
| H | -16.24112900 | -0.29817900 | -3.98848400 |
| H | -15.29760700 | -2.27340400 | -5.44879400 |
| H | -12.55600400 | -4.75965100 | -1.79197600 |
| H | -9.88164900  | -4.01770300 | 2.56846100  |
| H | -7.16439700  | -0.53186600 | 5.23755000  |
| H | -4.29428100  | 3.73691600  | 4.79824000  |
| H | -1.24474500  | 6.40194500  | 1.59611200  |
| H | 1.90108400   | 6.00059100  | -2.47844200 |
| H | 4.92211600   | 2.74366000  | -5.10599500 |
| H | 7.70866300   | -1.58096800 | -4.71741100 |
| H | 10.28816800  | -4.57550100 | -1.39573500 |
| H | 12.80136400  | -4.48928500 | 3.12999600  |
| H | 15.70490500  | -1.35230400 | 3.90398800  |
| C | 14.84555800  | -3.88070100 | 5.06401900  |
| H | 15.23399600  | -4.87295200 | 4.80695300  |
| H | 15.63284800  | -3.34162600 | 5.59721900  |
| H | 14.01194900  | -4.03066800 | 5.75963400  |
| C | 12.25865800  | -5.42966500 | 0.45998200  |
| H | 13.28042500  | -5.39986400 | 0.84697200  |
| H | 11.64222500  | -5.95572400 | 1.19982000  |
| H | 12.25357500  | -6.03453500 | -0.45187200 |
| C | 9.72792800   | -3.39823900 | -3.90493100 |
| H | 10.76312500  | -3.56869600 | -3.59732600 |
| H | 9.17753100   | -4.33274700 | -3.73770700 |
| H | 9.71715300   | -3.20610200 | -4.98190900 |
| C | 7.04013600   | 0.96005700  | -5.71287200 |
| H | 8.08956800   | 0.68521400  | -5.57659800 |
| H | 6.55239300   | 0.13653300  | -6.24968400 |
| H | 6.99756400   | 1.83883000  | -6.36301700 |
| C | 4.09969300   | 5.22883100  | -4.09060300 |
| H | 5.16467400   | 4.98820700  | -4.14929500 |
| H | 3.65320100   | 4.98130600  | -5.06198600 |

|     |              |             |             |
|-----|--------------|-------------|-------------|
| H   | 3.99961300   | 6.30976200  | -3.95548600 |
| C   | 0.95257100   | 7.05910600  | -0.06856900 |
| H   | 2.02843000   | 6.98075500  | -0.24788400 |
| H   | 0.50416500   | 7.51708500  | -0.95931300 |
| H   | 0.79334900   | 7.75014400  | 0.76432100  |
| C   | -2.16102900  | 5.45654800  | 4.07408200  |
| H   | -1.08863500  | 5.57414600  | 3.89599100  |
| H   | -2.65130800  | 6.38268200  | 3.74835000  |
| H   | -2.32176300  | 5.36849000  | 5.15253200  |
| C   | -5.10408700  | 1.28990700  | 5.92426800  |
| H   | -4.04243000  | 1.54798400  | 5.88252600  |
| H   | -5.63685500  | 2.15691500  | 6.33493300  |
| H   | -5.22924400  | 0.46808300  | 6.63536700  |
| C   | -7.86125800  | -3.10656700 | 4.33726000  |
| H   | -6.81154200  | -2.84383400 | 4.49378900  |
| H   | -8.41401100  | -2.79776600 | 5.23357500  |
| H   | -7.93591700  | -4.19603800 | 4.27190000  |
| C   | -10.49657600 | -5.25847900 | 0.09732800  |
| H   | -9.45669600  | -5.12521800 | 0.40715700  |
| H   | -11.03544300 | -5.70986400 | 0.94005600  |
| H   | -10.51993700 | -5.98082000 | -0.72404300 |
| C   | -13.13736300 | -3.85721000 | -4.46520700 |
| H   | -12.10897600 | -3.93465700 | -4.10313600 |
| H   | -13.62981300 | -4.81729600 | -4.26464400 |
| H   | -13.11047400 | -3.73068600 | -5.55185000 |
| CHO |              |             |             |
| C   | -5.90299400  | 0.08706700  | -3.05086200 |
| C   | -7.08454800  | 0.75825900  | -3.07098500 |
| C   | -6.98134000  | 2.14177900  | -2.70365300 |
| C   | -5.66210200  | 2.51448100  | -2.39021400 |
| S   | -4.60242400  | 1.12973600  | -2.57808700 |
| C   | -5.08358500  | 3.76939600  | -1.95948500 |
| C   | -5.64570700  | 5.01951900  | -1.83656500 |
| C   | -4.75918800  | 6.03963700  | -1.38889600 |
| C   | -3.45317300  | 5.56689100  | -1.15360600 |
| S   | -3.38450300  | 3.85150500  | -1.49438100 |
| C   | -2.24836500  | 6.22203800  | -0.70587400 |
| C   | -2.02284500  | 7.53571300  | -0.35442000 |
| C   | -0.69161100  | 7.83383200  | 0.04510400  |
| C   | 0.15962000   | 6.71045500  | 0.00191200  |
| S   | -0.74630600  | 5.31235600  | -0.53441800 |
| C   | 1.55998700   | 6.54203000  | 0.29966200  |
| C   | 2.48649300   | 7.44344700  | 0.78034000  |
| C   | 3.79755100   | 6.92462200  | 0.95647900  |
| C   | 3.90095300   | 5.56232000  | 0.60757300  |
| S   | 2.34669200   | 4.98234000  | 0.05041400  |
| C   | 5.00351300   | 4.63460600  | 0.63793300  |
| C   | 6.34396000   | 4.84568600  | 0.88420300  |

|   |             |             |             |
|---|-------------|-------------|-------------|
| C | 7.16140800  | 3.68607400  | 0.80543300  |
| C | 6.43221000  | 2.51994500  | 0.49175600  |
| S | 4.73955700  | 2.92259900  | 0.30385000  |
| C | 6.82766300  | 1.14426900  | 0.32362000  |
| C | 8.07983000  | 0.56568600  | 0.33426200  |
| C | 8.09681800  | -0.83785400 | 0.11441500  |
| C | 6.80816700  | -1.38180300 | -0.06420400 |
| S | 5.61581500  | -0.10480800 | 0.03284100  |
| C | 6.34670800  | -2.72923200 | -0.28438600 |
| C | 7.05081100  | -3.88179000 | -0.56329700 |
| C | 6.25500800  | -5.04431300 | -0.74838800 |
| C | 4.87470600  | -4.79461000 | -0.59917800 |
| S | 4.62281300  | -3.10106300 | -0.23809200 |
| C | 3.71994700  | -5.65363200 | -0.67518900 |
| C | 3.61371000  | -6.97926400 | -1.04117200 |
| C | 2.29465300  | -7.50671000 | -1.01779100 |
| C | 1.33224400  | -6.56179600 | -0.60629800 |
| S | 2.11671400  | -5.03243000 | -0.27871800 |
| C | -0.09222700 | -6.65323900 | -0.40695300 |
| C | -0.97823300 | -7.65799100 | -0.73359200 |
| C | -2.33465300 | -7.39744100 | -0.39919900 |
| C | -2.51814500 | -6.13926400 | 0.21089200  |
| S | -0.97316000 | -5.33129400 | 0.36057700  |
| C | -3.69167200 | -5.45995000 | 0.70095400  |
| C | -4.99418800 | -5.89593500 | 0.81852500  |
| C | -5.89920200 | -4.94626000 | 1.36756500  |
| C | -5.28044700 | -3.72643200 | 1.70233800  |
| S | -3.58302900 | -3.79845300 | 1.28506800  |
| C | -5.78520400 | -2.51211400 | 2.30384100  |
| C | -7.08559300 | -2.10863600 | 2.54210500  |
| C | -7.17802200 | -0.82207800 | 3.14351200  |
| C | -5.94575000 | -0.24423400 | 3.36544300  |
| S | -4.66189800 | -1.25672000 | 2.85529600  |
| H | -5.70618800 | -0.94935100 | -3.28498600 |
| H | -8.02840900 | 0.29781200  | -3.34113700 |
| H | -6.68931700 | 5.19232300  | -2.06530300 |
| H | -2.81736000 | 8.27012500  | -0.38977900 |
| H | 2.21229400  | 8.46773000  | 0.99856900  |
| H | 6.72326400  | 5.83096700  | 1.12296000  |
| H | 8.97070000  | 1.15709800  | 0.50284700  |
| H | 8.13132000  | -3.87862200 | -0.62604600 |
| H | 4.48584000  | -7.55735600 | -1.31867000 |
| H | -0.64173200 | -8.57227900 | -1.20506600 |
| H | -5.28497000 | -6.89057900 | 0.50582300  |
| H | -7.93099200 | -2.73596100 | 2.29215200  |
| H | -5.75728700 | 0.72217600  | 3.81242200  |
| C | -8.44877900 | -0.15938700 | 3.50039600  |
| O | -8.52108500 | 0.94370300  | 4.00755800  |

|    |             |             |             |
|----|-------------|-------------|-------------|
| H  | -9.36112700 | -0.74889600 | 3.26973900  |
| C  | -7.30162300 | -5.36828800 | 1.52205800  |
| O  | -8.25515200 | -4.69945700 | 1.88448800  |
| H  | -7.45010900 | -6.43419700 | 1.25390900  |
| C  | -3.31955600 | -8.43630600 | -0.73985200 |
| O  | -4.51905000 | -8.44328900 | -0.51451900 |
| H  | -2.85643300 | -9.29686000 | -1.26369500 |
| C  | 2.12921300  | -8.91926300 | -1.39635600 |
| O  | 1.09216300  | -9.55158100 | -1.51572300 |
| H  | 3.10025100  | -9.41805000 | -1.59042600 |
| C  | 6.96293700  | -6.29933700 | -1.04743000 |
| O  | 6.48640000  | -7.39754800 | -1.28519200 |
| H  | 8.06407400  | -6.16972000 | -1.04557500 |
| C  | 9.40961400  | -1.50288400 | 0.12236800  |
| O  | 9.66291800  | -2.67472400 | -0.10617300 |
| H  | 10.23323200 | -0.80242200 | 0.36812400  |
| C  | 8.59943800  | 3.86392300  | 1.06233400  |
| O  | 9.48501600  | 3.02512200  | 1.01828000  |
| H  | 8.85149400  | 4.91189100  | 1.32218500  |
| C  | 4.81886300  | 7.84805800  | 1.47553700  |
| O  | 6.00779500  | 7.63687300  | 1.65319400  |
| H  | 4.39863000  | 8.84589100  | 1.71451900  |
| C  | -0.40531300 | 9.22609800  | 0.42555300  |
| O  | 0.64711800  | 9.70199500  | 0.82068400  |
| H  | -1.29521000 | 9.87923600  | 0.32174500  |
| C  | -5.31702500 | 7.39320200  | -1.24602500 |
| O  | -4.75070400 | 8.41178400  | -0.88197100 |
| H  | -6.39152700 | 7.43342500  | -1.51675300 |
| C  | -8.21531000 | 2.93641700  | -2.69765200 |
| O  | -8.35207000 | 4.12810100  | -2.46962700 |
| H  | -9.10932000 | 2.32505500  | -2.94270200 |
| Cl |             |             |             |
| C  | 13.03007300 | 2.64506500  | -5.15449400 |
| C  | 12.51335000 | 3.88787400  | -5.37902300 |
| C  | 11.72516000 | 4.34734800  | -4.28503200 |
| C  | 11.63763000 | 3.46377000  | -3.22652800 |
| S  | 12.57816600 | 2.02707400  | -3.60196500 |
| C  | 10.92856200 | 3.57704500  | -1.96659200 |
| C  | 10.64610100 | 4.70453700  | -1.22955300 |
| C  | 9.93528200  | 4.42107700  | -0.03623900 |
| C  | 9.66058600  | 3.08263600  | 0.17776700  |
| S  | 10.30696000 | 2.14709600  | -1.16104600 |
| C  | 8.96355200  | 2.42810400  | 1.26457600  |
| C  | 8.84468700  | 2.81883300  | 2.58037100  |
| C  | 8.08993600  | 1.90910200  | 3.36111600  |
| C  | 7.61642100  | 0.80261000  | 2.67846400  |
| S  | 8.12872200  | 0.90589000  | 1.00152900  |
| C  | 6.81624500  | -0.31283700 | 3.13584200  |



|   |              |             |             |
|---|--------------|-------------|-------------|
| C | 6.72890700   | -0.85986800 | 4.39757100  |
| C | 5.84008700   | -1.96063000 | 4.46276200  |
| C | 5.22870900   | -2.29320300 | 3.26652100  |
| S | 5.78190300   | -1.18774000 | 2.01839700  |
| C | 4.27074400   | -3.33187600 | 2.95632100  |
| C | 4.06651800   | -4.54264100 | 3.58237800  |
| C | 3.03456100   | -5.30699500 | 2.98542100  |
| C | 2.42459700   | -4.71795800 | 1.89140400  |
| S | 3.16575700   | -3.15150100 | 1.60323700  |
| C | 1.34622200   | -5.18566600 | 1.04846800  |
| C | 0.94498000   | -6.47743100 | 0.78290400  |
| C | -0.15326000  | -6.54335500 | -0.10870700 |
| C | -0.62160900  | -5.32012000 | -0.55601300 |
| S | 0.34341900   | -4.04339900 | 0.16840900  |
| C | -1.71083000  | -4.99791300 | -1.45165500 |
| C | -2.26982500  | -5.76279700 | -2.45302400 |
| C | -3.31945400  | -5.10017700 | -3.13462900 |
| C | -3.59310000  | -3.81910700 | -2.68850400 |
| S | -2.50265700  | -3.43229300 | -1.36690200 |
| C | -4.57984400  | -2.85863800 | -3.13228600 |
| C | -5.16326400  | -2.72347100 | -4.37354600 |
| C | -6.08418100  | -1.64937400 | -4.43767600 |
| C | -6.23086900  | -0.93076600 | -3.26436400 |
| S | -5.18430400  | -1.62599400 | -2.03684500 |
| C | -7.06857700  | 0.20851600  | -2.95745700 |
| C | -7.54007900  | 1.19097500  | -3.80060600 |
| C | -8.32877700  | 2.16032900  | -3.13323800 |
| C | -8.48039000  | 1.95831600  | -1.77320500 |
| S | -7.61021600  | 0.50376300  | -1.31312000 |
| C | -9.20874100  | 2.72361900  | -0.78351600 |
| C | -9.49249100  | 4.07133500  | -0.76592400 |
| C | -10.22586400 | 4.46613900  | 0.38124800  |
| C | -10.51768300 | 3.44825400  | 1.26918800  |
| S | -9.85675900  | 1.94439400  | 0.65093900  |
| C | -11.24339500 | 3.47305200  | 2.52452100  |
| C | -11.33164100 | 4.48823100  | 3.45072000  |
| C | -12.13484800 | 4.13140600  | 4.56924400  |
| C | -12.65289600 | 2.86806400  | 4.51262000  |
| S | -12.17595200 | 2.07660200  | 3.04951700  |
| H | 13.65742700  | 2.05504400  | -5.80748800 |
| H | 12.66863200  | 4.46557600  | -6.28112000 |
| H | 10.94189000  | 5.70354100  | -1.51653600 |
| H | 9.28854400   | 3.71614800  | 2.98673700  |
| H | 7.28630400   | -0.50216200 | 5.25105100  |
| H | 4.63740100   | -4.88806300 | 4.43188100  |
| H | 1.42019600   | -7.35536000 | 1.19547800  |
| H | -1.94017300  | -6.75924100 | -2.70839600 |
| H | -4.93833500  | -3.35647400 | -5.21952600 |

|    |              |             |             |
|----|--------------|-------------|-------------|
| H  | -7.32499200  | 1.23406500  | -4.85847500 |
| H  | -9.18198500  | 4.76508700  | -1.53387300 |
| H  | -10.83115200 | 5.44101500  | 3.35343100  |
| H  | -13.28257700 | 2.37032000  | 5.23478600  |
| Cl | 10.91927800  | 5.89311300  | -4.35072000 |
| Cl | 9.44458700   | 5.71106300  | 1.03045600  |
| Cl | 7.78785700   | 2.23010100  | 5.04879900  |
| Cl | 5.55554300   | -2.77798900 | 5.97721400  |
| Cl | 2.59076900   | -6.85889500 | 3.64682600  |
| Cl | -0.84058800  | -8.08493000 | -0.54948600 |
| Cl | -4.18771700  | -5.90515200 | -4.41571400 |
| Cl | -6.96281300  | -1.32440800 | -5.90934700 |
| Cl | -9.05579900  | 3.47430100  | -4.02114700 |
| Cl | -10.72229900 | 6.12600300  | 0.58994400  |
| Cl | -12.41408800 | 5.22265700  | 5.90329000  |
| CN |              |             |             |
| C  | 7.04459500   | -5.65855600 | 6.36136200  |
| C  | 7.09354600   | -6.85898500 | 5.71864000  |
| C  | 7.35932000   | -6.72540700 | 4.31753600  |
| C  | 7.51688300   | -5.40163500 | 3.90928600  |
| S  | 7.34013900   | -4.33552100 | 5.28154400  |
| C  | 7.79450600   | -4.88763100 | 2.58375600  |
| C  | 8.35241500   | -5.53725800 | 1.50590200  |
| C  | 8.47533700   | -4.71490600 | 0.34997600  |
| C  | 8.01395700   | -3.40988900 | 0.53546800  |
| S  | 7.41683600   | -3.22324000 | 2.16479200  |
| C  | 7.98433100   | -2.31103600 | -0.40260900 |
| C  | 8.65940700   | -2.17306800 | -1.59684600 |
| C  | 8.38694900   | -0.94643100 | -2.26333100 |
| C  | 7.49433800   | -0.11736900 | -1.57852900 |
| S  | 6.99524300   | -0.88977700 | -0.09526900 |
| C  | 6.99268500   | 1.18577100  | -1.94724200 |
| C  | 7.46322700   | 2.05565100  | -2.90873700 |
| C  | 6.71498700   | 3.26163400  | -2.99654900 |
| C  | 5.65315500   | 3.33514000  | -2.09056900 |
| S  | 5.59824900   | 1.87952000  | -1.12988400 |
| C  | 4.69099900   | 4.39420000  | -1.89645800 |
| C  | 4.74200300   | 5.70141400  | -2.33351200 |
| C  | 3.60811500   | 6.47034300  | -1.95331100 |
| C  | 2.66548700   | 5.75643000  | -1.20770600 |
| S  | 3.21025800   | 4.11299000  | -0.98969400 |
| C  | 1.40734600   | 6.20462000  | -0.65935800 |
| C  | 0.95385400   | 7.49386600  | -0.47332800 |
| C  | -0.34559600  | 7.56029100  | 0.09955400  |
| C  | -0.91009100  | 6.30934900  | 0.36734500  |
| S  | 0.20021900   | 5.04982200  | -0.10879900 |
| C  | -2.19729600  | 5.99219200  | 0.93860100  |
| C  | -3.07994300  | 6.82090900  | 1.59983700  |

|   |              |             |             |
|---|--------------|-------------|-------------|
| C | -4.26259300  | 6.16070900  | 2.03137000  |
| C | -4.30166800  | 4.80094400  | 1.70714800  |
| S | -2.84428600  | 4.35846500  | 0.85507000  |
| C | -5.33093600  | 3.82635800  | 1.97894600  |
| C | -6.40548500  | 3.91750600  | 2.83932800  |
| C | -7.22010200  | 2.75276400  | 2.85436100  |
| C | -6.77438300  | 1.73957400  | 1.99956500  |
| S | -5.32730500  | 2.26137100  | 1.17526100  |
| C | -7.34180400  | 0.43522000  | 1.75516800  |
| C | -8.30841300  | -0.23813500 | 2.47282100  |
| C | -8.62378500  | -1.51711200 | 1.93819500  |
| C | -7.89309600  | -1.84761700 | 0.79237200  |
| S | -6.81073200  | -0.53897100 | 0.39005500  |
| C | -7.94439100  | -3.04512300 | -0.01289100 |
| C | -8.57101800  | -4.24422500 | 0.25601100  |
| C | -8.41126200  | -5.21008600 | -0.77625700 |
| C | -7.64932900  | -4.76085600 | -1.85621600 |
| S | -7.12951800  | -3.12138700 | -1.57040800 |
| C | -7.28566800  | -5.45897000 | -3.07098900 |
| C | -7.25269500  | -6.81729400 | -3.30313600 |
| C | -6.83496000  | -7.14285800 | -4.63002000 |
| C | -6.55295400  | -6.03001300 | -5.39397800 |
| S | -6.80474600  | -4.57495200 | -4.51588900 |
| H | 6.85848500   | -5.46583100 | 7.40830300  |
| H | 6.94163600   | -7.81607000 | 6.20137500  |
| H | 8.67215300   | -6.57045200 | 1.52424700  |
| H | 9.33457600   | -2.91646600 | -1.99835000 |
| H | 8.31739800   | 1.85325000  | -3.54046300 |
| H | 5.55963900   | 6.11455600  | -2.90833800 |
| H | 1.52224800   | 8.37706900  | -0.73146200 |
| H | -2.90172500  | 7.87217400  | 1.78072400  |
| H | -6.61853600  | 4.78398100  | 3.45046800  |
| H | -8.78695700  | 0.15510200  | 3.35939300  |
| H | -9.13435200  | -4.44392700 | 1.15730100  |
| H | -7.50338000  | -7.56441900 | -2.56245100 |
| H | -6.22131100  | -6.00341400 | -6.42208500 |
| C | -6.70667200  | -8.47820000 | -5.12012700 |
| N | -6.59786800  | -9.56503600 | -5.51927600 |
| C | -8.99421900  | -6.50856900 | -0.69954700 |
| N | -9.46097200  | -7.57239500 | -0.63020900 |
| C | -9.60214400  | -2.36385000 | 2.53439000  |
| N | -10.39501700 | -3.06039700 | 3.02536900  |
| C | -8.38295700  | 2.65289400  | 3.67137800  |
| N | -9.32804400  | 2.56443000  | 4.34505200  |
| C | -5.30190400  | 6.84532500  | 2.72483900  |
| N | -6.14865400  | 7.39921200  | 3.30021200  |
| C | -0.99479600  | 8.80088800  | 0.36276300  |
| N | -1.52414700  | 9.81270000  | 0.58826100  |

|      |             |             |             |
|------|-------------|-------------|-------------|
| C    | 3.46386800  | 7.84063900  | -2.31606500 |
| N    | 3.34698300  | 8.96295400  | -2.60158500 |
| C    | 7.03249500  | 4.28511700  | -3.93559200 |
| N    | 7.29440100  | 5.12789100  | -4.69448800 |
| C    | 8.97809700  | -0.61691400 | -3.51712800 |
| N    | 9.46608300  | -0.33966800 | -4.53687100 |
| C    | 9.01981500  | -5.20116600 | -0.87348100 |
| N    | 9.47382000  | -5.59258400 | -1.87131300 |
| C    | 7.43146900  | -7.84592400 | 3.44166900  |
| N    | 7.49802100  | -8.76748600 | 2.73319800  |
| COOH |             |             |             |
| C    | 4.77396500  | 6.50333500  | -4.08836000 |
| C    | 5.73737900  | 7.45334600  | -3.94616400 |
| C    | 6.83440200  | 7.03764400  | -3.12104900 |
| C    | 6.68036400  | 5.73997700  | -2.62864600 |
| S    | 5.17739800  | 5.05913200  | -3.22250200 |
| C    | 7.49297100  | 4.92123100  | -1.74385300 |
| C    | 8.85510700  | 4.85797300  | -1.58148800 |
| C    | 9.29105700  | 3.87547900  | -0.64506000 |
| C    | 8.24016100  | 3.15297200  | -0.07085100 |
| S    | 6.71539700  | 3.74414200  | -0.69258300 |
| C    | 8.19916500  | 2.05462100  | 0.87746500  |
| C    | 9.04368300  | 1.72753900  | 1.91224100  |
| C    | 8.62970400  | 0.59706800  | 2.67448500  |
| C    | 7.43765400  | 0.02530500  | 2.21537200  |
| S    | 6.84763000  | 0.92652400  | 0.83732900  |
| C    | 6.67615200  | -1.13744600 | 2.63258300  |
| C    | 6.51626900  | -1.70885500 | 3.87283600  |
| C    | 5.62821000  | -2.82220000 | 3.89785500  |
| C    | 5.07863500  | -3.12151600 | 2.64639500  |
| S    | 5.71271000  | -2.01531100 | 1.44869200  |
| C    | 4.12480000  | -4.11997300 | 2.20055700  |
| C    | 3.86722300  | -5.38809600 | 2.66603600  |
| C    | 2.89346200  | -6.10528900 | 1.91314800  |
| C    | 2.37263600  | -5.37304300 | 0.83936800  |
| S    | 3.12786500  | -3.79601700 | 0.78579000  |
| C    | 1.35176200  | -5.66164800 | -0.15153100 |
| C    | 0.95187800  | -6.85277900 | -0.71061800 |
| C    | -0.04515800 | -6.72525200 | -1.72026900 |
| C    | -0.44085500 | -5.40122700 | -1.94510000 |
| S    | 0.46145100  | -4.33474400 | -0.89235200 |
| C    | -1.43781200 | -4.80040600 | -2.81233700 |
| C    | -1.93161900 | -5.20281000 | -4.03112200 |
| C    | -2.86660300 | -4.30099900 | -4.61628700 |
| C    | -3.11664300 | -3.17118600 | -3.82717900 |
| S    | -2.15578600 | -3.25480300 | -2.36749200 |
| C    | -4.01100400 | -2.03765700 | -3.97436100 |
| C    | -4.51737700 | -1.42742900 | -5.09844800 |

|   |              |             |             |
|---|--------------|-------------|-------------|
| C | -5.32655200  | -0.28456100 | -4.83601500 |
| C | -5.46120800  | -0.00133700 | -3.47128300 |
| S | -4.55537000  | -1.17224100 | -2.53926400 |
| C | -6.20669400  | 1.00348700  | -2.73695500 |
| C | -6.58642100  | 2.27855800  | -3.08705000 |
| C | -7.26431500  | 2.99376700  | -2.05875500 |
| C | -7.41073100  | 2.25997000  | -0.87683500 |
| S | -6.72158100  | 0.66650100  | -1.08590900 |
| C | -7.98489100  | 2.57873700  | 0.41644600  |
| C | -9.03462100  | 3.39955400  | 0.75507900  |
| C | -9.34655700  | 3.40924200  | 2.14530900  |
| C | -8.52455300  | 2.57048800  | 2.90386900  |
| S | -7.34662400  | 1.80479600  | 1.86386400  |
| C | -8.49378000  | 2.23736400  | 4.31805500  |
| C | -8.79777300  | 2.99864900  | 5.42475600  |
| C | -8.57651100  | 2.31135600  | 6.65432900  |
| C | -8.10735900  | 1.02990700  | 6.48041700  |
| S | -7.93302800  | 0.63483900  | 4.82097400  |
| H | 3.85389600   | 6.55690800  | -4.65285700 |
| H | 5.69276300   | 8.43296000  | -4.40246800 |
| H | 9.53537400   | 5.50219500  | -2.11484800 |
| H | 9.94836300   | 2.27708600  | 2.11752100  |
| H | 7.02461500   | -1.34334900 | 4.75029300  |
| H | 4.35758200   | -5.79628100 | 3.53516700  |
| H | 1.35510000   | -7.80295400 | -0.39943500 |
| H | -1.63975900  | -6.13077500 | -4.49580300 |
| H | -4.32376000  | -1.79497500 | -6.09326100 |
| H | -6.38681900  | 2.69669800  | -4.06039700 |
| H | -9.57211800  | 3.98590000  | 0.02730400  |
| H | -9.17250200  | 4.00772400  | 5.35507400  |
| H | -7.87536800  | 0.31705300  | 7.25896300  |
| C | -8.80190400  | 2.85698500  | 8.00981100  |
| O | -8.61716700  | 2.24681500  | 9.04406500  |
| C | -10.47763100 | 4.20854200  | 2.66498800  |
| O | -10.70292400 | 4.49296600  | 3.82613500  |
| C | -7.69677000  | 4.39267700  | -2.26484700 |
| O | -8.46528200  | 5.03314500  | -1.57206800 |
| C | -5.96341300  | 0.45832700  | -5.94445800 |
| O | -6.52633500  | 1.53583300  | -5.88088500 |
| C | -3.49665100  | -4.61175400 | -5.91746800 |
| O | -4.15611800  | -3.86230800 | -6.61402500 |
| C | -0.58876400  | -7.92182200 | -2.39820600 |
| O | -1.29101400  | -7.94858000 | -3.39199600 |
| C | 2.49382100   | -7.47391100 | 2.30624500  |
| O | 1.82142700   | -8.25712100 | 1.66144100  |
| C | 5.32031600   | -3.51551200 | 5.16745500  |
| O | 4.77873900   | -4.59696600 | 5.30080600  |
| C | 9.44672300   | 0.10333500  | 3.80401200  |

|   |              |             |             |
|---|--------------|-------------|-------------|
| O | 9.12507300   | -0.72389800 | 4.63693100  |
| C | 10.73134000  | 3.65722500  | -0.39255900 |
| O | 11.23025200  | 3.03311300  | 0.52522000  |
| C | 7.95489100   | 7.95018800  | -2.81967100 |
| O | 9.01656900   | 7.66889300  | -2.29622800 |
| O | -9.24299000  | 4.13786700  | 7.98391100  |
| H | -9.36198200  | 4.39784000  | 8.91254200  |
| O | -11.29204500 | 4.62788800  | 1.66361600  |
| H | -11.97971500 | 5.16372800  | 2.09241600  |
| O | -7.12597800  | 4.93335900  | -3.37106700 |
| H | -7.48971400  | 5.83152900  | -3.44035200 |
| O | -5.85133900  | -0.20776200 | -7.12086600 |
| H | -6.27801000  | 0.35934600  | -7.78417500 |
| O | -3.25012800  | -5.88995900 | -6.29834300 |
| H | -3.68186900  | -5.99366800 | -7.16237100 |
| O | -0.20164700  | -9.06491600 | -1.77914200 |
| H | -0.58585800  | -9.78843900 | -2.30126100 |
| O | 2.98299100   | -7.80510400 | 3.52718600  |
| H | 2.68793100   | -8.71639400 | 3.68905400  |
| O | 5.72740300   | -2.79294600 | 6.24126200  |
| H | 5.51309200   | -3.33520400 | 7.01838200  |
| O | 10.66490100  | 0.69898300  | 3.83630600  |
| H | 11.11632200  | 0.32996700  | 4.61331700  |
| O | 11.49992700  | 4.25982400  | -1.33509900 |
| H | 12.41909000  | 4.08968300  | -1.07045200 |
| O | 7.67963500   | 9.22344200  | -3.21191900 |
| H | 8.47340600   | 9.73892500  | -2.99273900 |
| F |              |             |             |
| C | -4.41275800  | -8.58037900 | -0.46742100 |
| C | -5.62740800  | -9.20215400 | -0.39268600 |
| C | -6.68047700  | -8.26146100 | -0.27911200 |
| C | -6.30248400  | -6.93418800 | -0.26499800 |
| S | -4.55403100  | -6.85304700 | -0.39946200 |
| C | -7.15376000  | -5.77390300 | -0.16108400 |
| C | -8.53100200  | -5.74041400 | -0.05720400 |
| C | -9.02133800  | -4.42340800 | 0.02439400  |
| C | -8.07848400  | -3.41395500 | -0.01117200 |
| S | -6.48888200  | -4.14777300 | -0.15475400 |
| C | -8.29689900  | -1.99419100 | 0.05312600  |
| C | -9.50264300  | -1.32330500 | 0.15900500  |
| C | -9.32734700  | 0.07146600  | 0.19366500  |
| C | -8.02502400  | 0.53053300  | 0.11981500  |
| S | -6.95602400  | -0.85840700 | -0.00118400 |
| C | -7.56326700  | 1.89104400  | 0.13347000  |
| C | -8.32353700  | 3.04578900  | 0.20250200  |
| C | -7.52521800  | 4.20283400  | 0.19304900  |
| C | -6.15802400  | 4.00773100  | 0.11947600  |
| S | -5.84988100  | 2.27885400  | 0.05730300  |

|   |              |              |             |
|---|--------------|--------------|-------------|
| C | -5.12117300  | 5.00169000   | 0.09555600  |
| C | -5.26194000  | 6.37892600   | 0.10808200  |
| C | -4.01928200  | 7.03521000   | 0.07688900  |
| C | -2.89654700  | 6.22825000   | 0.04058200  |
| S | -3.42195700  | 4.55150400   | 0.04636900  |
| C | -1.51777300  | 6.62956500   | 0.00509600  |
| C | -1.00662300  | 7.91606600   | -0.01303000 |
| C | 0.39860300   | 7.92372800   | -0.04659300 |
| C | 1.02201200   | 6.68913600   | -0.05506400 |
| S | -0.21840300  | 5.44476500   | -0.02063300 |
| C | 2.43042000   | 6.40817200   | -0.08478900 |
| C | 3.47738400   | 7.31256900   | -0.13565100 |
| C | 4.72768100   | 6.67023100   | -0.15002300 |
| C | 4.71132700   | 5.28788500   | -0.11232400 |
| S | 3.03697800   | 4.75757800   | -0.05461200 |
| C | 5.83142900   | 4.38831200   | -0.11596200 |
| C | 7.17785800   | 4.70662300   | -0.16192700 |
| C | 7.99089800   | 3.55975200   | -0.14903700 |
| C | 7.33835000   | 2.34183000   | -0.09433400 |
| S | 5.60787400   | 2.64477800   | -0.05635100 |
| C | 7.91735800   | 1.02684600   | -0.07044200 |
| C | 9.25885200   | 0.68840300   | -0.09815800 |
| C | 9.45188100   | -0.70420400  | -0.06101500 |
| C | 8.31166600   | -1.48325100  | -0.00469800 |
| S | 6.91527600   | -0.41667000  | 0.00222600  |
| C | 8.21744000   | -2.91758900  | 0.04124100  |
| C | 9.24862600   | -3.83877600  | 0.03147400  |
| C | 8.77279800   | -5.16312900  | 0.08702800  |
| C | 7.40320700   | -5.32329600  | 0.14103200  |
| S | 6.66063900   | -3.73197900  | 0.11798700  |
| C | 6.64990300   | -6.55235700  | 0.20533200  |
| C | 7.13416800   | -7.84468700  | 0.17111100  |
| C | 6.09141700   | -8.80123800  | 0.25771900  |
| C | 4.83145900   | -8.28668600  | 0.35652100  |
| S | 4.89687900   | -6.55216300  | 0.34890000  |
| H | -3.43531600  | -9.03158600  | -0.55902200 |
| H | -5.78337500  | -10.27296800 | -0.41576400 |
| H | -9.16165400  | -6.61707700  | -0.04060900 |
| H | -10.46696000 | -1.80729000  | 0.20960600  |
| H | -9.40205400  | 3.06155300   | 0.25656600  |
| H | -6.21096700  | 6.89374800   | 0.13696700  |
| H | -1.61094700  | 8.81109600   | -0.00251300 |
| H | 3.35421800   | 8.38523100   | -0.16237300 |
| H | 7.56405600   | 5.71444000   | -0.20273200 |
| H | 10.06603900  | 1.40455500   | -0.14285000 |
| H | 10.29649400  | -3.58043100  | -0.01292600 |
| H | 8.18044700   | -8.09909100  | 0.08560600  |
| H | 3.89453200   | -8.81618300  | 0.43281100  |

|   |              |              |             |
|---|--------------|--------------|-------------|
| F | 6.34648100   | -10.12020300 | 0.24024500  |
| F | 9.61843500   | -6.21053000  | 0.08838400  |
| F | 10.68545900  | -1.24125100  | -0.07949700 |
| F | 9.33273600   | 3.65088800   | -0.18818300 |
| F | 5.87520000   | 7.37049900   | -0.19834300 |
| F | 1.09342400   | 9.07528000   | -0.06823300 |
| F | -3.93503500  | 8.37755200   | 0.08191100  |
| F | -8.06959300  | 5.43111100   | 0.25326000  |
| F | -10.37577200 | 0.90787200   | 0.29376100  |
| F | -10.33777100 | -4.17073600  | 0.13083900  |
| F | -7.96583100  | -8.64883300  | -0.19103700 |
| H |              |              |             |
| C | 11.49143200  | -5.31104200  | 4.74973900  |
| C | 11.30828400  | -6.47395600  | 4.05261200  |
| C | 10.92590900  | -6.25504400  | 2.69978000  |
| C | 10.82634800  | -4.92051700  | 2.36536000  |
| S | 11.21720100  | -3.91891000  | 3.75320300  |
| C | 10.48304400  | -4.35482000  | 1.07546900  |
| C | 10.64507400  | -4.92988100  | -0.16879300 |
| C | 10.17250800  | -4.12768700  | -1.23422700 |
| C | 9.65459200   | -2.91256300  | -0.82894300 |
| S | 9.74008200   | -2.77355900  | 0.91844900  |
| C | 9.12427800   | -1.85656400  | -1.66259000 |
| C | 9.34862800   | -1.65152400  | -3.01095800 |
| C | 8.65398600   | -0.54154000  | -3.54277300 |
| C | 7.89410500   | 0.14012600   | -2.61048000 |
| S | 8.03552900   | -0.62951100  | -1.03957600 |
| C | 7.09485300   | 1.32583900   | -2.82015800 |
| C | 7.18761900   | 2.23415900   | -3.85846400 |
| C | 6.23465900   | 3.27518700   | -3.79265500 |
| C | 5.39935700   | 3.19894200   | -2.69342300 |
| S | 5.80056100   | 1.78871200   | -1.72899200 |
| C | 4.34786200   | 4.11687600   | -2.31954500 |
| C | 4.17519100   | 5.42114100   | -2.74525600 |
| C | 3.02394900   | 6.04616500   | -2.21633400 |
| C | 2.29533900   | 5.24158900   | -1.35969100 |
| S | 3.05408400   | 3.66507000   | -1.22308400 |
| C | 1.09319400   | 5.58602800   | -0.63580700 |
| C | 0.61293000   | 6.85119200   | -0.35152300 |
| C | -0.61397600  | 6.85164000   | 0.34876500  |
| C | -1.09535100  | 5.58682000   | 0.63272500  |
| S | -0.00160000  | 4.36976100   | -0.00168300 |
| C | -2.29776900  | 5.24326100   | 1.35654900  |
| C | -3.02601300  | 6.04846800   | 2.21292400  |
| C | -4.17760200  | 5.42423200   | 2.74196400  |
| C | -4.35099600  | 4.11992900   | 2.31659400  |
| S | -3.05736600  | 3.66710900   | 1.22038200  |
| C | -5.40306000  | 3.20272100   | 2.69057300  |



|            |              |             |             |
|------------|--------------|-------------|-------------|
| C          | -6.23992000  | 3.28089700  | 3.78851100  |
| C          | -7.19291300  | 2.23996800  | 3.85488200  |
| C          | -7.09869800  | 1.32977100  | 2.81833400  |
| S          | -5.80288700  | 1.79071800  | 1.72816000  |
| C          | -7.89765800  | 0.14371400  | 2.60961000  |
| C          | -8.65953700  | -0.53585000 | 3.54182400  |
| C          | -9.35319300  | -1.64691700 | 3.01101800  |
| C          | -9.12610700  | -1.85492500 | 1.66355800  |
| S          | -8.03591400  | -0.62938400 | 1.04011100  |
| C          | -9.65486600  | -2.91265000 | 0.83112300  |
| C          | -10.17398700 | -4.12673700 | 1.23798500  |
| C          | -10.64446100 | -4.93117700 | 0.17332700  |
| C          | -10.47958100 | -4.35893400 | -1.07186400 |
| S          | -9.73643700  | -2.77757100 | -0.91677000 |
| C          | -10.82037200 | -4.92734000 | -2.36122800 |
| C          | -10.91979400 | -6.26256000 | -2.69292200 |
| C          | -11.29946700 | -6.48429000 | -4.04605300 |
| C          | -11.48068100 | -5.32283600 | -4.74611300 |
| S          | -11.20797000 | -3.92862600 | -3.75207000 |
| H          | 11.76832200  | -5.18429100 | 5.78682200  |
| H          | 11.42813300  | -7.45724000 | 4.49269200  |
| H          | 11.10606000  | -5.90099600 | -0.30601300 |
| H          | 10.00802200  | -2.28193000 | -3.59582800 |
| H          | 7.93386300   | 2.15394600  | -4.64010900 |
| H          | 4.87090300   | 5.91467500  | -3.41359500 |
| H          | 1.14197200   | 7.75394600  | -0.63328600 |
| H          | -2.72664900  | 7.06032500  | 2.45947300  |
| H          | -6.15780000  | 4.06557400  | 4.53136300  |
| H          | -8.70521800  | -0.24346500 | 4.58429600  |
| H          | -10.20362100 | -4.43086100 | 2.27768900  |
| H          | -10.69765600 | -7.05667500 | -1.98980800 |
| H          | -11.75535500 | -5.19825400 | -5.78404800 |
| H          | -11.41881500 | -7.46849200 | -4.48421400 |
| H          | -11.10604500 | -5.90184000 | 0.31173200  |
| H          | -10.01385100 | -2.27597200 | 3.59591400  |
| H          | -7.94020800  | 2.16115500  | 4.63566500  |
| H          | -4.87299400  | 5.91835900  | 3.41019400  |
| H          | -1.14219000  | 7.75479600  | 0.63079400  |
| H          | 2.72511300   | 7.05811800  | -2.46312700 |
| H          | 6.15137500   | 4.05849800  | -4.53681900 |
| H          | 8.69751700   | -0.25143500 | -4.58597500 |
| H          | 10.19977800  | -4.43414200 | -2.27331000 |
| H          | 10.70201500  | -7.05061700 | 1.99887100  |
| <i>iPr</i> |              |             |             |
| C          | 17.64145400  | -1.20599000 | 1.64942000  |
| C          | 17.24446600  | -2.50999900 | 1.57750000  |
| C          | 16.05850500  | -2.71552500 | 0.79882100  |
| C          | 15.57669800  | -1.52888400 | 0.27365400  |

|   |              |             |             |
|---|--------------|-------------|-------------|
| S | 16.58681000  | -0.16965400 | 0.75151600  |
| C | 14.41474600  | -1.29748100 | -0.57575300 |
| C | 14.00746500  | -1.99433700 | -1.68962500 |
| C | 12.80655100  | -1.51321800 | -2.29545900 |
| C | 12.30216700  | -0.40518500 | -1.63485400 |
| S | 13.30115400  | 0.01621600  | -0.25194400 |
| C | 11.12263200  | 0.39310600  | -1.94013000 |
| C | 10.68632000  | 0.85666300  | -3.16015900 |
| C | 9.47171200   | 1.60663600  | -3.12092700 |
| C | 8.98545500   | 1.73621600  | -1.83000100 |
| S | 10.02091000  | 0.90608500  | -0.67756100 |
| C | 7.79722700   | 2.43106200  | -1.35475300 |
| C | 7.31093600   | 3.66566600  | -1.72056200 |
| C | 6.10250900   | 4.05501200  | -1.06686500 |
| C | 5.67299700   | 3.09894200  | -0.16063800 |
| S | 6.75230500   | 1.71233800  | -0.14494200 |
| C | 4.51509700   | 3.11323400  | 0.72210700  |
| C | 4.02324900   | 4.14562800  | 1.48812800  |
| C | 2.85761000   | 3.82854000  | 2.24983100  |
| C | 2.46813800   | 2.51062300  | 2.07507900  |
| S | 3.52952100   | 1.68137300  | 0.94617900  |
| C | 1.36539600   | 1.78237600  | 2.68724300  |
| C | 0.95218300   | 1.78542100  | 3.99996100  |
| C | -0.17074600  | 0.94885900  | 4.27988900  |
| C | -0.60784200  | 0.27488900  | 3.15116500  |
| S | 0.35601800   | 0.70278600  | 1.74548600  |
| C | -1.69007400  | -0.68993600 | 3.01202700  |
| C | -2.01536300  | -1.74450200 | 3.83406700  |
| C | -3.14565200  | -2.50950800 | 3.41429000  |
| C | -3.67940200  | -2.03497600 | 2.22712000  |
| S | -2.79504100  | -0.62859200 | 1.65327300  |
| C | -4.80746200  | -2.53699700 | 1.45471300  |
| C | -5.12834900  | -3.83765400 | 1.13963200  |
| C | -6.31813800  | -3.99384700 | 0.36554700  |
| C | -6.90333000  | -2.77482600 | 0.06405700  |
| S | -5.99213900  | -1.44534800 | 0.76446400  |
| C | -8.10088000  | -2.49048300 | -0.71442600 |
| C | -8.50571000  | -3.03926300 | -1.90983500 |
| C | -9.74718700  | -2.54217800 | -2.41126800 |
| C | -10.28777700 | -1.57125800 | -1.58411500 |
| S | -9.26938100  | -1.29971800 | -0.17777200 |
| C | -11.51562600 | -0.80287000 | -1.73769400 |
| C | -12.02008900 | -0.19289800 | -2.86328800 |
| C | -13.26453500 | 0.48316400  | -2.67520600 |
| C | -13.70435400 | 0.40295700  | -1.36480400 |
| S | -12.58928600 | -0.53046300 | -0.37906400 |
| C | -14.89955600 | 0.96980500  | -0.75208700 |
| C | -15.42527900 | 2.23362600  | -0.88558900 |

|   |              |             |             |
|---|--------------|-------------|-------------|
| C | -16.62645500 | 2.46163500  | -0.13818600 |
| C | -16.99320400 | 1.34573900  | 0.56893500  |
| S | -15.90620600 | 0.01634400  | 0.32780900  |
| H | 18.49062700  | -0.79295700 | 2.17590900  |
| H | 17.77439800  | -3.31313400 | 2.07727800  |
| H | 14.57531300  | -2.82977300 | -2.08207500 |
| H | 11.24296500  | 0.67954700  | -4.07286400 |
| H | 7.82729800   | 4.29792100  | -2.43293900 |
| H | 4.50809300   | 5.11395100  | 1.52487700  |
| H | 1.46534600   | 2.36084900  | 4.76139200  |
| H | -1.43425200  | -1.98393600 | 4.71677200  |
| H | -4.50440100  | -4.67128600 | 1.43939600  |
| H | -7.90698400  | -3.77372800 | -2.43551100 |
| H | -11.49269200 | -0.20803600 | -3.80975400 |
| H | -14.94615800 | 2.99980900  | -1.48493600 |
| H | -17.84495500 | 1.22015300  | 1.22184900  |
| C | 12.17187600  | -2.17514300 | -3.50405100 |
| H | 11.19261800  | -1.70914200 | -3.65514300 |
| C | 11.93536000  | -3.67893300 | -3.26961700 |
| H | 12.87862600  | -4.22083300 | -3.14076900 |
| H | 11.32550200  | -3.84909800 | -2.37747700 |
| H | 11.41608400  | -4.12137100 | -4.12646500 |
| C | 15.40894500  | -4.07546000 | 0.62617500  |
| H | 14.44951600  | -3.91879400 | 0.12226000  |
| C | 15.11483600  | -4.74043800 | 1.98412300  |
| H | 14.58675300  | -5.68881900 | 1.83810300  |
| H | 16.03681100  | -4.95806800 | 2.53432900  |
| H | 14.49251400  | -4.09745700 | 2.61335800  |
| C | 8.80607700   | 2.15958500  | -4.36708000 |
| H | 7.82094700   | 2.53618500  | -4.07267300 |
| C | 8.58241100   | 1.06433500  | -5.42657700 |
| H | 9.53129800   | 0.66306100  | -5.79892300 |
| H | 8.00181900   | 0.23151100  | -5.01897300 |
| H | 8.03775500   | 1.47083700  | -6.28546000 |
| C | 5.38705600   | 5.35845200  | -1.36895700 |
| H | 4.41425500   | 5.32131000  | -0.86774500 |
| C | 5.12216600   | 5.52602100  | -2.87696800 |
| H | 6.05582800   | 5.60403100  | -3.44469500 |
| H | 4.55589500   | 4.67932900  | -3.27610100 |
| H | 4.54652600   | 6.43887900  | -3.06356100 |
| C | 2.14113300   | 4.84506400  | 3.11898000  |
| H | 1.20934900   | 4.38368900  | 3.46215700  |
| C | 1.76313100   | 6.10719500  | 2.32111800  |
| H | 2.65142700   | 6.64180400  | 1.96732000  |
| H | 1.15241700   | 5.85599600  | 1.44889400  |
| H | 1.19134900   | 6.79854000  | 2.94938500  |
| C | -0.79728300  | 0.84657800  | 5.65785900  |
| H | -1.72190500  | 0.26916500  | 5.55511000  |

|   |              |             |             |
|---|--------------|-------------|-------------|
| C | -1.17763700  | 2.23175200  | 6.21349800  |
| H | -0.29384600  | 2.85931000  | 6.37213600  |
| H | -1.84782800  | 2.76170500  | 5.53022900  |
| H | -1.68608700  | 2.12922300  | 7.17809000  |
| C | -3.68458800  | -3.68369900 | 4.20996900  |
| H | -4.63205300  | -3.98409200 | 3.75062300  |
| C | -3.98352300  | -3.29176800 | 5.66921500  |
| H | -3.07177900  | -3.00474600 | 6.20452800  |
| H | -4.68116900  | -2.45051400 | 5.71862900  |
| H | -4.42902500  | -4.13563600 | 6.20677100  |
| C | -6.86226500  | -5.35019200 | -0.04227800 |
| H | -7.85571300  | -5.18801900 | -0.47321500 |
| C | -7.03274000  | -6.28261900 | 1.17165800  |
| H | -6.06982600  | -6.51665200 | 1.63874900  |
| H | -7.67415100  | -5.82873400 | 1.93288600  |
| H | -7.48784300  | -7.23004100 | 0.86363200  |
| C | -10.38283500 | -3.05399400 | -3.69020500 |
| H | -11.38874500 | -2.62553100 | -3.74966900 |
| C | -10.53567100 | -4.58636600 | -3.67640800 |
| H | -9.56264300  | -5.08916900 | -3.65270600 |
| H | -11.10759100 | -4.91950300 | -2.80531200 |
| H | -11.05878500 | -4.92506100 | -4.57707700 |
| C | -14.00289300 | 1.17944500  | -3.80274500 |
| H | -14.98378900 | 1.47529200  | -3.41648800 |
| C | -14.24216300 | 0.23345800  | -4.99452300 |
| H | -13.29941200 | -0.08186400 | -5.45485100 |
| H | -14.78130200 | -0.66626300 | -4.68344300 |
| H | -14.83412600 | 0.73521300  | -5.76748500 |
| C | -17.34503000 | 3.79898500  | -0.12616900 |
| H | -17.42598700 | 4.12668800  | -1.17286100 |
| C | -16.51605900 | 4.86082700  | 0.62497400  |
| H | -16.41167100 | 4.59008300  | 1.68114100  |
| H | -15.50992600 | 4.95788500  | 0.20623100  |
| H | -17.00149200 | 5.84129700  | 0.57038300  |
| C | 16.26303600  | -4.99954400 | -0.26377900 |
| H | 15.76539200  | -5.96469200 | -0.40886300 |
| H | 16.44076300  | -4.55543300 | -1.24838200 |
| H | 17.24085700  | -5.19337600 | 0.19128200  |
| C | 13.00592800  | -1.94174500 | -4.77894400 |
| H | 12.51393200  | -2.38837600 | -5.64993100 |
| H | 13.14648900  | -0.87422900 | -4.97592100 |
| H | 14.00039000  | -2.39298000 | -4.68949200 |
| C | 9.60482300   | 3.33870400  | -4.95673600 |
| H | 9.09370400   | 3.75271200  | -5.83281900 |
| H | 9.73309400   | 4.14220800  | -4.22451800 |
| H | 10.60425300  | 3.01950000  | -5.27270400 |
| C | 6.16033600   | 6.56871600  | -0.80928300 |
| H | 5.61431500   | 7.49896200  | -1.00077900 |

|    |              |             |             |
|----|--------------|-------------|-------------|
| H  | 6.31680700   | 6.48021300  | 0.27045400  |
| H  | 7.14692600   | 6.65786500  | -1.27753700 |
| C  | 2.97312900   | 5.21028100  | 4.36374200  |
| H  | 2.42528400   | 5.91138900  | 5.00275300  |
| H  | 3.21551200   | 4.32362100  | 4.95802100  |
| H  | 3.91914300   | 5.68545300  | 4.08130900  |
| C  | 0.12168200   | 0.09353400  | 6.63980200  |
| H  | -0.35881600  | -0.00741800 | 7.61911300  |
| H  | 0.36434900   | -0.90875000 | 6.27286000  |
| H  | 1.06710900   | 0.62780800  | 6.78519900  |
| C  | -2.72799600  | -4.89082300 | 4.15085800  |
| H  | -3.14749100  | -5.74350300 | 4.69595400  |
| H  | -2.54022000  | -5.20351300 | 3.11883500  |
| H  | -1.75939800  | -4.64966200 | 4.60263500  |
| C  | -5.98199100  | -6.00972300 | -1.12208200 |
| H  | -6.40655700  | -6.97045900 | -1.43325400 |
| H  | -5.89013300  | -5.37330700 | -2.00788200 |
| H  | -4.97004200  | -6.19774000 | -0.74645600 |
| C  | -9.59894700  | -2.59086000 | -4.93387200 |
| H  | -10.09137900 | -2.93245000 | -5.85094500 |
| H  | -9.51997300  | -1.49987200 | -4.97400400 |
| H  | -8.58023700  | -2.99435600 | -4.93165300 |
| C  | -13.26912700 | 2.45739400  | -4.25386400 |
| H  | -13.83518200 | 2.97256900  | -5.03773100 |
| H  | -13.12798500 | 3.15307100  | -3.42075600 |
| H  | -12.27806800 | 2.22248800  | -4.65791000 |
| C  | -18.76634300 | 3.71570400  | 0.44488600  |
| H  | -19.26648600 | 4.68604100  | 0.36715200  |
| H  | -19.37216200 | 2.97767500  | -0.08979500 |
| H  | -18.75202600 | 3.43942800  | 1.50536200  |
| Li |              |             |             |
| C  | -18.93130400 | -1.55077100 | -0.02900400 |
| C  | -18.43661900 | -2.61029100 | 0.68683200  |
| C  | -17.14912500 | -2.40931400 | 1.29071400  |
| C  | -16.71151400 | -1.12550700 | 0.99327100  |
| S  | -17.84706600 | -0.19507800 | -0.02277800 |
| C  | -15.43286800 | -0.56761000 | 1.42662400  |
| C  | -14.81051500 | -0.77959300 | 2.66128700  |
| C  | -13.47687100 | -0.27357000 | 2.81601000  |
| C  | -13.11128400 | 0.37477200  | 1.64495100  |
| S  | -14.35656100 | 0.32147800  | 0.36638300  |
| C  | -11.83294600 | 1.05801700  | 1.44816200  |
| C  | -11.16480700 | 1.84903800  | 2.38774900  |
| C  | -9.83734500  | 2.27829800  | 2.05399300  |
| C  | -9.52762900  | 1.80721500  | 0.78645400  |
| S  | -10.81601400 | 0.82357000  | 0.04078600  |
| C  | -8.26938400  | 2.08712400  | 0.09260500  |
| C  | -7.59875600  | 3.31285200  | 0.06315600  |

|   |              |             |             |
|---|--------------|-------------|-------------|
| C | -6.28668100  | 3.32469200  | -0.51638100 |
| C | -5.99357000  | 2.04641700  | -0.96823400 |
| S | -7.27848000  | 0.84995000  | -0.65144400 |
| C | -4.75335500  | 1.68385600  | -1.65688300 |
| C | -4.10544200  | 2.43662800  | -2.63976200 |
| C | -2.80479900  | 1.99187600  | -3.04952000 |
| C | -2.49798900  | 0.83088900  | -2.35543800 |
| S | -3.75580200  | 0.32089600  | -1.19758200 |
| C | -1.26534900  | 0.06323400  | -2.54215000 |
| C | -0.64680800  | -0.22079400 | -3.76248300 |
| C | 0.65057300   | -0.83021100 | -3.70884700 |
| C | 0.98539300   | -1.03532800 | -2.37876500 |
| S | -0.24216600  | -0.45658900 | -1.22089200 |
| C | 2.22150700   | -1.67995600 | -1.93156100 |
| C | 2.81549800   | -2.81017200 | -2.49911900 |
| C | 4.11775200   | -3.17189700 | -2.01894300 |
| C | 4.48237400   | -2.27928200 | -1.02220000 |
| S | 3.27637800   | -1.00198300 | -0.71103400 |
| C | 5.73082100   | -2.35972200 | -0.26223100 |
| C | 6.32202800   | -3.52469100 | 0.23366600  |
| C | 7.63306000   | -3.39864700 | 0.80132500  |
| C | 8.00825100   | -2.06464400 | 0.74967900  |
| S | 6.80103400   | -0.99736800 | -0.01642300 |
| C | 9.26537300   | -1.54260000 | 1.28706500  |
| C | 9.86643500   | -1.91767200 | 2.49155500  |
| C | 11.18045400  | -1.40497000 | 2.75069700  |
| C | 11.54816700  | -0.58376900 | 1.69577700  |
| S | 10.33018200  | -0.47759200 | 0.39612400  |
| C | 12.80571800  | 0.16194200  | 1.63417300  |
| C | 13.41727900  | 0.83792700  | 2.69280000  |
| C | 14.72948400  | 1.36711800  | 2.45544700  |
| C | 15.08328100  | 1.09379000  | 1.14371100  |
| S | 13.85679900  | 0.17051600  | 0.23470800  |
| C | 16.33207800  | 1.53625300  | 0.51679300  |
| C | 16.90953700  | 2.80064800  | 0.62202100  |
| C | 18.22543100  | 2.96825900  | 0.04465400  |
| C | 18.60249900  | 1.76643700  | -0.51125400 |
| S | 17.42563700  | 0.46831600  | -0.33397200 |
| H | -19.87264800 | -1.47967500 | -0.56044200 |
| H | -18.99732200 | -3.53832200 | 0.77181400  |
| H | -15.38800100 | -1.20519100 | 3.48411300  |
| H | -11.70405700 | 2.20001600  | 3.27018200  |
| H | -8.12570800  | 4.21770500  | 0.37380700  |
| H | -4.64208700  | 3.25285000  | -3.12856700 |
| H | -1.20367700  | -0.07656700 | -4.69112300 |
| H | 2.23718900   | -3.42939800 | -3.18871400 |
| H | 5.73596600   | -4.44557700 | 0.27788800  |
| H | 9.28526900   | -2.47543900 | 3.22944400  |

|             |              |             |             |
|-------------|--------------|-------------|-------------|
| H           | 12.84478700  | 1.04267700  | 3.60030800  |
| H           | 16.31465800  | 3.62548900  | 1.01843900  |
| H           | 19.50996300  | 1.52148600  | -1.05351400 |
| Li          | 19.32532900  | 4.56483500  | -0.31075300 |
| Li          | 16.51864200  | 2.12406600  | 2.77545700  |
| Li          | 12.95249600  | -1.18473000 | 3.59269200  |
| Li          | 9.40271300   | -3.90198700 | 1.51825800  |
| Li          | 5.88204400   | -4.05230500 | -1.91582700 |
| Li          | 2.42371000   | -1.48446800 | -4.28079400 |
| Li          | -1.01125200  | 1.99999600  | -3.87322800 |
| Li          | -4.47227500  | 3.93195200  | -0.99750100 |
| Li          | -8.01124600  | 2.99411300  | 2.25101400  |
| Li          | -11.65898800 | -0.02345100 | 3.52597300  |
| Li          | -15.35970500 | -2.84986600 | 1.96269600  |
| <i>n</i> Bu |              |             |             |
| C           | -18.42742600 | 0.86743600  | 1.64994800  |
| C           | -18.05844300 | 2.17558900  | 1.52525500  |
| C           | -16.85889800 | 2.37220300  | 0.76557200  |
| C           | -16.33774500 | 1.17487600  | 0.30781200  |
| S           | -17.32772300 | -0.18424600 | 0.82646000  |
| C           | -15.15706600 | 0.93453200  | -0.51284700 |
| C           | -14.76137600 | 1.57819700  | -1.66203500 |
| C           | -13.54153800 | 1.09902100  | -2.23051900 |
| C           | -13.01058900 | 0.04629100  | -1.50505400 |
| S           | -14.00756400 | -0.32415200 | -0.10607600 |
| C           | -11.81339100 | -0.74196300 | -1.76674800 |
| C           | -11.39338200 | -1.30045700 | -2.95166800 |
| C           | -10.16142900 | -2.01866900 | -2.87539700 |
| C           | -9.64505000  | -2.02645000 | -1.59027400 |
| S           | -10.67352900 | -1.12002400 | -0.49039000 |
| C           | -8.43717900  | -2.66477700 | -1.08515000 |
| C           | -7.96270600  | -3.93232800 | -1.33311300 |
| C           | -6.73109800  | -4.25190500 | -0.68481900 |
| C           | -6.27220200  | -3.20631500 | 0.09960700  |
| S           | -7.35291200  | -1.82363100 | 0.00504900  |
| C           | -5.08866600  | -3.13506200 | 0.94444800  |
| C           | -4.58108400  | -4.08386800 | 1.80255400  |
| C           | -3.39367900  | -3.69573200 | 2.49434900  |
| C           | -3.00419000  | -2.40630800 | 2.17252200  |
| S           | -4.09214700  | -1.69389800 | 0.99043300  |
| C           | -1.88834500  | -1.62322400 | 2.68559600  |
| C           | -1.46565100  | -1.47638200 | 3.98672100  |
| C           | -0.33460600  | -0.62149500 | 4.15867300  |
| C           | 0.09832400   | -0.08654300 | 2.95779900  |
| S           | -0.87823500  | -0.66816000 | 1.61769000  |
| C           | 1.18317900   | 0.85381400  | 2.70573400  |
| C           | 1.46807300   | 2.03106100  | 3.35734800  |
| C           | 2.61233600   | 2.72937200  | 2.86422000  |

|   |              |             |             |
|---|--------------|-------------|-------------|
| C | 3.19712700   | 2.07466900  | 1.79377200  |
| S | 2.34437700   | 0.58432600  | 1.42110000  |
| C | 4.35113400   | 2.46657200  | 0.99441900  |
| C | 4.63523100   | 3.69138400  | 0.43686700  |
| C | 5.86557100   | 3.75238100  | -0.28617100 |
| C | 6.52062200   | 2.53278800  | -0.29739000 |
| S | 5.62313300   | 1.32422600  | 0.60926000  |
| C | 7.77675400   | 2.16600600  | -0.93868300 |
| C | 8.20465700   | 2.43739900  | -2.21756900 |
| C | 9.50333900   | 1.93515500  | -2.53621200 |
| C | 10.06559000  | 1.24311200  | -1.47707200 |
| S | 8.99559100   | 1.24162300  | -0.08346800 |
| C | 11.34846600  | 0.55605700  | -1.40010400 |
| C | 11.91954600  | -0.30907200 | -2.30415900 |
| C | 13.20201100  | -0.81283800 | -1.92613500 |
| C | 13.60373300  | -0.33456300 | -0.69137400 |
| S | 12.40465300  | 0.75667500  | -0.01541400 |
| C | 14.81791400  | -0.62731900 | 0.06159400  |
| C | 15.38927400  | -1.84750100 | 0.33801100  |
| C | 16.58951800  | -1.77596000 | 1.11616800  |
| C | 16.90867000  | -0.48039200 | 1.42928800  |
| S | 15.77775200  | 0.66016400  | 0.77659000  |
| H | -19.28102600 | 0.45940400  | 2.17314000  |
| H | -18.61914400 | 2.99152900  | 1.96811800  |
| H | -15.35160300 | 2.36887200  | -2.11122800 |
| H | -11.97495900 | -1.22162100 | -3.86304200 |
| H | -8.50465100  | -4.63843500 | -1.95136800 |
| H | -5.06939100  | -5.03839800 | 1.96085600  |
| H | -1.97737500  | -1.94943000 | 4.81719600  |
| H | 0.84904400   | 2.40803200  | 4.16358800  |
| H | 3.95776500   | 4.53349100  | 0.52169400  |
| H | 7.58524900   | 2.96746600  | -2.93215500 |
| H | 11.41573600  | -0.60494700 | -3.21742100 |
| H | 14.93653700  | -2.78210400 | 0.02577000  |
| H | 17.74723000  | -0.13075400 | 2.01656700  |
| C | 17.39545100  | -2.98119800 | 1.53294500  |
| C | 18.13324100  | -3.66451400 | 0.36562800  |
| H | 16.73285900  | -3.71446300 | 2.01307900  |
| H | 18.12498700  | -2.68310200 | 2.29531100  |
| C | 18.94259200  | -4.89140100 | 0.80180200  |
| H | 17.40510800  | -3.96069100 | -0.40152500 |
| H | 18.79806600  | -2.93377000 | -0.11348400 |
| C | 19.67761200  | -5.57113200 | -0.35727000 |
| H | 19.66820100  | -4.59104700 | 1.56996600  |
| H | 18.27205200  | -5.61471300 | 1.28554100  |
| H | 20.24762500  | -6.44061800 | -0.01445100 |
| H | 18.97521000  | -5.91574600 | -1.12459400 |
| H | 20.37997300  | -4.88194300 | -0.83950900 |



|   |             |             |             |
|---|-------------|-------------|-------------|
| C | 14.01104000 | -1.72306000 | -2.81886400 |
| C | 14.37643500 | -1.08628300 | -4.17383400 |
| H | 13.44775400 | -2.64930500 | -3.00145600 |
| H | 14.93048100 | -2.01706400 | -2.30511700 |
| C | 15.19235300 | -2.02304400 | -5.07265500 |
| H | 13.46168200 | -0.78365700 | -4.70070900 |
| H | 14.94272100 | -0.16349100 | -3.99240500 |
| C | 15.56610600 | -1.39203300 | -6.41717500 |
| H | 16.10589500 | -2.32593300 | -4.54342900 |
| H | 14.62236300 | -2.94614200 | -5.24620500 |
| H | 16.14692200 | -2.08348000 | -7.03610300 |
| H | 14.67228300 | -1.10875100 | -6.98455900 |
| H | 16.16728300 | -0.48685000 | -6.27582000 |
| C | 10.16768200 | 2.18929200  | -3.86826700 |
| C | 10.35179900 | 3.68558000  | -4.18752500 |
| H | 9.57191400  | 1.72588100  | -4.66773900 |
| H | 11.14494500 | 1.69904700  | -3.88890400 |
| C | 11.02914700 | 3.92694500  | -5.54191900 |
| H | 9.37721700  | 4.19131100  | -4.17485300 |
| H | 10.94633800 | 4.14969100  | -3.38988300 |
| C | 11.21529800 | 5.41259200  | -5.86407500 |
| H | 12.00549000 | 3.42411700  | -5.55208200 |
| H | 10.43472300 | 3.45133500  | -6.33414100 |
| H | 11.69776000 | 5.55396100  | -6.83656000 |
| H | 10.25260700 | 5.93565600  | -5.89127700 |
| H | 11.83738600 | 5.90647300  | -5.10922600 |
| C | 6.37846300  | 5.02991200  | -0.90690100 |
| C | 6.58805500  | 6.16560700  | 0.11374900  |
| H | 5.67269900  | 5.37051600  | -1.67799400 |
| H | 7.32457400  | 4.83443000  | -1.41917500 |
| C | 7.10634000  | 7.45770600  | -0.52842800 |
| H | 5.64484100  | 6.37380400  | 0.63614600  |
| H | 7.29404300  | 5.82693600  | 0.88312900  |
| C | 7.31980600  | 8.58792600  | 0.48297100  |
| H | 8.05076100  | 7.24934400  | -1.04902700 |
| H | 6.39949700  | 7.78679900  | -1.30252100 |
| H | 7.68938600  | 9.49596100  | -0.00424000 |
| H | 6.38556200  | 8.84288200  | 0.99611200  |
| H | 8.04905200  | 8.30110500  | 1.24882300  |
| C | 3.11814600  | 4.00432200  | 3.49606700  |
| C | 3.51867500  | 3.83906600  | 4.97507100  |
| H | 2.34309200  | 4.78048800  | 3.42189700  |
| H | 3.98025900  | 4.37482200  | 2.93474900  |
| C | 4.03147200  | 5.14108800  | 5.60202700  |
| H | 2.66091200  | 3.47115100  | 5.55361000  |
| H | 4.29223900  | 3.06381000  | 5.05000900  |
| C | 4.43488700  | 4.98339200  | 7.07099200  |
| H | 4.89040400  | 5.50641600  | 5.02322200  |

|   |              |             |             |
|---|--------------|-------------|-------------|
| H | 3.25607400   | 5.91466300  | 5.51550500  |
| H | 4.79545300   | 5.92823500  | 7.49024200  |
| H | 3.58767900   | 4.65088600  | 7.68155700  |
| H | 5.23417900   | 4.24258800  | 7.18498100  |
| C | 0.31114600   | -0.39711500 | 5.50510100  |
| C | 0.89144400   | -1.68366400 | 6.12454800  |
| H | -0.42903000  | 0.02930700  | 6.19692700  |
| H | 1.11045700   | 0.34305100  | 5.41217100  |
| C | 1.52868600   | -1.44975400 | 7.49928000  |
| H | 0.10088800   | -2.44061800 | 6.21398000  |
| H | 1.63837500   | -2.10310100 | 5.43813800  |
| C | 2.12053600   | -2.72235600 | 8.11234000  |
| H | 2.31469900   | -0.68794800 | 7.40822100  |
| H | 0.77632500   | -1.02933300 | 8.18063800  |
| H | 2.56832700   | -2.52349700 | 9.09134400  |
| H | 1.35248900   | -3.49220100 | 8.24859900  |
| H | 2.90070700   | -3.14512400 | 7.46952500  |
| C | -2.65618700  | -4.62637500 | 3.42765900  |
| C | -2.22469500  | -5.94898300 | 2.76552900  |
| H | -3.29174700  | -4.85399700 | 4.29567700  |
| H | -1.76930800  | -4.12108000 | 3.82002300  |
| C | -1.46704500  | -6.87544300 | 3.72412700  |
| H | -3.10576900  | -6.47517600 | 2.37495800  |
| H | -1.59416000  | -5.72334500 | 1.89569300  |
| C | -1.03381200  | -8.19152100 | 3.07173700  |
| H | -0.58348100  | -6.35009500 | 4.11092300  |
| H | -2.09911300  | -7.08896100 | 4.59710100  |
| H | -0.49430700  | -8.82983700 | 3.77879600  |
| H | -1.89868700  | -8.75703500 | 2.70660000  |
| H | -0.37339800  | -8.01043400 | 2.21628900  |
| C | -6.02499200  | -5.57194400 | -0.88609800 |
| C | -5.75682600  | -5.91297800 | -2.36443400 |
| H | -6.62304000  | -6.37922100 | -0.43861000 |
| H | -5.07326100  | -5.56159500 | -0.34751600 |
| C | -5.03322800  | -7.25294300 | -2.54339800 |
| H | -6.70358500  | -5.93709600 | -2.91997000 |
| H | -5.16005300  | -5.10868000 | -2.81397700 |
| C | -4.75989600  | -7.59811700 | -4.01025600 |
| H | -4.08464500  | -7.22805400 | -1.99025100 |
| H | -5.63126800  | -8.05179600 | -2.08369100 |
| H | -4.24052900  | -8.55713400 | -4.10510100 |
| H | -5.69213700  | -7.66710200 | -4.58227000 |
| H | -4.13628700  | -6.83368800 | -4.48718300 |
| C | -9.51279700  | -2.64735000 | -4.08562200 |
| C | -9.21955000  | -1.64760500 | -5.22093800 |
| H | -10.16190700 | -3.44519900 | -4.47455200 |
| H | -8.57721500  | -3.12973300 | -3.78959800 |
| C | -8.56655900  | -2.30997600 | -6.44001600 |

|                 |              |             |             |
|-----------------|--------------|-------------|-------------|
| H               | -10.14923700 | -1.15334400 | -5.53242300 |
| H               | -8.56567700  | -0.85352200 | -4.83779400 |
| C               | -8.26520200  | -1.32359600 | -7.57218300 |
| H               | -7.63671300  | -2.80397500 | -6.12752900 |
| H               | -9.22319100  | -3.10789100 | -6.81317500 |
| H               | -7.80122700  | -1.82578400 | -8.42718000 |
| H               | -9.18035100  | -0.83731600 | -7.92891700 |
| H               | -7.58150000  | -0.53506900 | -7.23849700 |
| C               | -12.91605200 | 1.72508100  | -3.45402700 |
| C               | -12.58099400 | 3.21874500  | -3.27639800 |
| H               | -13.59653900 | 1.61266300  | -4.31032000 |
| H               | -12.00142000 | 1.18530200  | -3.71441000 |
| C               | -11.94545100 | 3.83918400  | -4.52619400 |
| H               | -13.49119700 | 3.77591300  | -3.01768500 |
| H               | -11.90114800 | 3.33221200  | -2.42201400 |
| C               | -11.60654200 | 5.32291600  | -4.35541800 |
| H               | -11.03393800 | 3.28231200  | -4.78189700 |
| H               | -12.62649100 | 3.71410700  | -5.37928200 |
| H               | -11.15216000 | 5.73612800  | -5.26167700 |
| H               | -12.50394100 | 5.91227000  | -4.13528500 |
| H               | -10.90148100 | 5.47557600  | -3.53063600 |
| C               | -16.23684300 | 3.73330000  | 0.56263900  |
| C               | -15.89033200 | 4.45418000  | 1.87958400  |
| H               | -16.92406900 | 4.36573100  | -0.01789200 |
| H               | -15.32846200 | 3.63456800  | -0.03848300 |
| C               | -15.26711800 | 5.83743200  | 1.65636500  |
| H               | -16.79361300 | 4.55960900  | 2.49484000  |
| H               | -15.19987800 | 3.82728600  | 2.45848200  |
| C               | -14.92307500 | 6.55928500  | 2.96252400  |
| H               | -14.36019400 | 5.73125600  | 1.04606800  |
| H               | -15.95854500 | 6.45537400  | 1.06697500  |
| H               | -14.48217100 | 7.54304900  | 2.77193600  |
| H               | -15.81639600 | 6.70893000  | 3.57954200  |
| H               | -14.20540500 | 5.98251800  | 3.55659800  |
| NH <sub>2</sub> |              |             |             |
| C               | 14.99189800  | -2.26134800 | 4.27799500  |
| C               | 14.47906400  | -3.48895700 | 4.58231100  |
| C               | 13.50738600  | -3.94387300 | 3.63404900  |
| C               | 13.30172300  | -3.03529400 | 2.60367000  |
| S               | 14.32648600  | -1.61930700 | 2.81650500  |
| C               | 12.39380200  | -3.16333400 | 1.48579500  |
| C               | 12.01203500  | -4.31554200 | 0.82864100  |
| C               | 11.08145700  | -4.09947100 | -0.23060400 |
| C               | 10.75196400  | -2.75951000 | -0.39697000 |
| S               | 11.59214800  | -1.76663500 | 0.79139100  |
| C               | 9.85291500   | -2.18864500 | -1.37038900 |
| C               | 9.57266200   | -2.64514000 | -2.64423200 |
| C               | 8.61692800   | -1.85523100 | -3.34757500 |

|   |              |             |             |
|---|--------------|-------------|-------------|
| C | 8.16248200   | -0.76795300 | -2.60966500 |
| S | 8.91846000   | -0.74559500 | -1.01826800 |
| C | 7.20555200   | 0.23211000  | -3.01448700 |
| C | 6.94994600   | 0.70374500  | -4.28835800 |
| C | 5.92005400   | 1.68713400  | -4.34851900 |
| C | 5.38121500   | 1.98695300  | -3.10212500 |
| S | 6.15265700   | 1.01651100  | -1.84964800 |
| C | 4.33317100   | 2.92998700  | -2.80043100 |
| C | 4.01188600   | 4.09510600  | -3.47157600 |
| C | 2.89692700   | 4.79331100  | -2.92350000 |
| C | 2.35756100   | 4.16529800  | -1.80614400 |
| S | 3.23645800   | 2.67931500  | -1.45282900 |
| C | 1.23693000   | 4.59740800  | -1.00910600 |
| C | 0.79396500   | 5.88777100  | -0.78455500 |
| C | -0.36395200  | 5.96942500  | 0.04199700  |
| C | -0.81452300  | 4.72606400  | 0.47211100  |
| S | 0.20388700   | 3.44458100  | -0.18112600 |
| C | -1.94622000  | 4.44336000  | 1.31875700  |
| C | -2.49946300  | 5.24107700  | 2.30342800  |
| C | -3.63340200  | 4.66705800  | 2.94786200  |
| C | -3.95329100  | 3.40345500  | 2.46368400  |
| S | -2.84236000  | 2.94042600  | 1.17613400  |
| C | -5.02215000  | 2.53833600  | 2.89627700  |
| C | -5.60670100  | 2.45995800  | 4.14680300  |
| C | -6.65516300  | 1.49925200  | 4.23923700  |
| C | -6.87650700  | 0.81826900  | 3.04747400  |
| S | -5.78092000  | 1.40044700  | 1.79567600  |
| C | -7.84106700  | -0.22351500 | 2.79517000  |
| C | -8.35097400  | -1.14885700 | 3.68656900  |
| C | -9.30527300  | -2.04098000 | 3.11643900  |
| C | -9.52730000  | -1.80881100 | 1.76425100  |
| S | -8.55192400  | -0.45124500 | 1.20623600  |
| C | -10.41267500 | -2.52874300 | 0.88137000  |
| C | -10.78662400 | -3.85738600 | 0.94528900  |
| C | -11.69720200 | -4.25522600 | -0.07806400 |
| C | -12.02214200 | -3.22299000 | -0.94730500 |
| S | -11.19764600 | -1.73928600 | -0.47638200 |
| C | -12.90311100 | -3.27932600 | -2.09241500 |
| C | -13.13086700 | -4.34225000 | -2.94241800 |
| C | -14.09094700 | -4.06801500 | -3.97033600 |
| C | -14.58648600 | -2.78989000 | -3.89301200 |
| S | -13.89675200 | -1.90700100 | -2.55998200 |
| H | 15.73326300  | -1.69846400 | 4.82744900  |
| H | 14.77321800  | -4.06463100 | 5.45330100  |
| H | 12.43792600  | -5.28733800 | 1.05282500  |
| H | 10.09290100  | -3.48298100 | -3.09489100 |
| H | 7.53607000   | 0.40933100  | -5.15173300 |
| H | 4.60546500   | 4.48281400  | -4.29191400 |

|                  |              |             |             |
|------------------|--------------|-------------|-------------|
| H                | 1.32832200   | 6.76187100  | -1.13942100 |
| H                | -2.05883700  | 6.18214100  | 2.61287300  |
| H                | -5.24295200  | 3.01963800  | 5.00118900  |
| H                | -7.99423100  | -1.23913600 | 4.70649400  |
| H                | -10.36071300 | -4.55300700 | 1.65975700  |
| H                | -12.56685600 | -5.26690900 | -2.88918300 |
| H                | -15.29598800 | -2.30958600 | -4.55191600 |
| N                | -14.38885200 | -4.99972700 | -4.97685100 |
| H                | -14.39040600 | -5.95776900 | -4.64948600 |
| H                | -15.24806800 | -4.79965500 | -5.47285700 |
| N                | -12.16173800 | -5.56923200 | -0.19723800 |
| H                | -12.22353700 | -6.05301600 | 0.69010600  |
| H                | -13.03454600 | -5.63686200 | -0.70943700 |
| N                | -9.90895400  | -3.06334200 | 3.85455800  |
| H                | -9.98628900  | -2.85174500 | 4.84163100  |
| H                | -10.80262600 | -3.35573200 | 3.47470300  |
| N                | -7.34549900  | 1.25619900  | 5.42999200  |
| H                | -7.37728900  | 2.05906000  | 6.04593300  |
| H                | -8.27301000  | 0.87340100  | 5.28374100  |
| N                | -4.31116300  | 5.31249400  | 3.98562300  |
| H                | -4.24038200  | 6.32150600  | 3.94361400  |
| H                | -5.27768900  | 5.01970600  | 4.07666100  |
| N                | -0.94363000  | 7.18917400  | 0.40047000  |
| H                | -0.78050400  | 7.92472600  | -0.27569100 |
| H                | -1.92948300  | 7.11463800  | 0.62572800  |
| N                | 2.43835200   | 6.00297700  | -3.45122300 |
| H                | 2.63936400   | 6.11198100  | -4.43740700 |
| H                | 1.45883500   | 6.18018100  | -3.25794700 |
| N                | 5.53852800   | 2.29943400  | -5.54479500 |
| H                | 5.69834400   | 1.72168700  | -6.36056600 |
| H                | 4.58853700   | 2.65361300  | -5.52992600 |
| N                | 8.22552500   | -2.14297700 | -4.65735000 |
| H                | 8.29816000   | -3.12501400 | -4.89217600 |
| H                | 7.30839100   | -1.77950600 | -4.89162600 |
| N                | 10.59950400  | -5.14015200 | -1.02798800 |
| H                | 10.58226700  | -6.03483800 | -0.55462300 |
| H                | 9.70280700   | -4.93685000 | -1.45552700 |
| N                | 12.86781800  | -5.18128100 | 3.74641100  |
| H                | 12.77526100  | -5.49861900 | 4.70360700  |
| H                | 11.97425200  | -5.21373500 | 3.26780000  |
| NMe <sub>2</sub> |              |             |             |
| C                | -9.23698200  | -4.49794000 | -6.81060800 |
| C                | -9.26869600  | -5.79586900 | -6.38905900 |
| C                | -9.13807700  | -5.93976100 | -4.96851200 |
| C                | -9.01786100  | -4.71049100 | -4.32110100 |
| S                | -9.04651300  | -3.39928200 | -5.49015400 |
| C                | -8.95482200  | -4.42537700 | -2.90257400 |
| C                | -9.37443200  | -5.21010600 | -1.84851800 |

|   |             |             |             |
|---|-------------|-------------|-------------|
| C | -9.19384300 | -4.61776200 | -0.56514700 |
| C | -8.62891100 | -3.34221200 | -0.63293300 |
| S | -8.28937400 | -2.91808800 | -2.30302500 |
| C | -8.37989700 | -2.39481700 | 0.42835300  |
| C | -8.91958000 | -2.36343800 | 1.69987700  |
| C | -8.48718000 | -1.26572800 | 2.49647900  |
| C | -7.59646800 | -0.42528700 | 1.82335500  |
| S | -7.28022800 | -1.04531800 | 0.21042600  |
| C | -7.01463100 | 0.82358900  | 2.25370000  |
| C | -7.43243500 | 1.66643700  | 3.26615000  |
| C | -6.64829000 | 2.84511400  | 3.41223000  |
| C | -5.60270600 | 2.91958000  | 2.48791900  |
| S | -5.59158900 | 1.48754700  | 1.47054100  |
| C | -4.65488300 | 3.98436500  | 2.26294000  |
| C | -4.73375100 | 5.30756000  | 2.65435400  |
| C | -3.63119000 | 6.10922100  | 2.24609800  |
| C | -2.67925800 | 5.39234200  | 1.51582400  |
| S | -3.16108100 | 3.70787800  | 1.38453100  |
| C | -1.47858600 | 5.86228500  | 0.86814800  |
| C | -1.12578800 | 7.15642000  | 0.53412300  |
| C | 0.13003600  | 7.27280600  | -0.12477100 |
| C | 0.76187700  | 6.04051700  | -0.31289400 |
| S | -0.21099400 | 4.75130900  | 0.37849000  |
| C | 1.98874200  | 5.73860100  | -1.00959500 |
| C | 2.68402500  | 6.51978400  | -1.91372700 |
| C | 3.85339300  | 5.90687500  | -2.44495700 |
| C | 4.06533700  | 4.61818400  | -1.94694100 |
| S | 2.81453600  | 4.20667300  | -0.78356300 |
| C | 5.07580400  | 3.65261800  | -2.30561300 |
| C | 5.88185000  | 3.62156400  | -3.42817900 |
| C | 6.76128400  | 2.50433200  | -3.49119700 |
| C | 6.62885100  | 1.64604200  | -2.39658300 |
| S | 5.42900900  | 2.27451500  | -1.27769600 |
| C | 7.27026700  | 0.37777000  | -2.14521900 |
| C | 7.90692500  | -0.46077400 | -3.04023000 |
| C | 8.40894000  | -1.66287300 | -2.46641600 |
| C | 8.15181800  | -1.76052800 | -1.09707500 |
| S | 7.31436600  | -0.32159700 | -0.53591800 |
| C | 8.42383200  | -2.85035800 | -0.18918300 |
| C | 8.70081500  | -4.17125000 | -0.48313400 |
| C | 8.88668700  | -5.00293500 | 0.65916400  |
| C | 8.74983700  | -4.30950000 | 1.86151700  |
| S | 8.41988300  | -2.61393200 | 1.54965900  |
| C | 8.78765000  | -4.80703900 | 3.22171600  |
| C | 8.55985900  | -6.08963800 | 3.66810400  |
| C | 8.62189100  | -6.23188300 | 5.09494100  |
| C | 8.91197200  | -5.03656600 | 5.71751300  |
| S | 9.10106500  | -3.73564700 | 4.57991700  |

|   |             |             |             |
|---|-------------|-------------|-------------|
| H | -9.29603400 | -4.12258600 | -7.82242000 |
| H | -9.36702900 | -6.63339200 | -7.06823400 |
| H | -9.80980600 | -6.18620000 | -2.01265500 |
| H | -9.62285700 | -3.11558900 | 2.02921600  |
| H | -8.29710700 | 1.43191100  | 3.87104100  |
| H | -5.58354800 | 5.67817900  | 3.21034400  |
| H | -1.77831000 | 7.99007600  | 0.75253900  |
| H | 2.33347400  | 7.50453700  | -2.18909800 |
| H | 5.81464400  | 4.38657900  | -4.18879600 |
| H | 7.98543000  | -0.20710900 | -4.08825500 |
| H | 8.74537900  | -4.52117500 | -1.50494800 |
| H | 8.30861800  | -6.88558800 | 2.98043500  |
| H | 9.03587800  | -4.83783400 | 6.77038300  |
| N | 8.34938400  | -7.44341700 | 5.75326700  |
| N | 9.17848000  | -6.39063400 | 0.58944300  |
| N | 9.10403100  | -2.66240400 | -3.19720400 |
| N | 7.68298600  | 2.27829600  | -4.54656300 |
| N | 4.72243800  | 6.53007800  | -3.37759100 |
| N | 0.69580900  | 8.50507300  | -0.54439600 |
| N | -3.49778300 | 7.48966800  | 2.54785200  |
| N | -6.89099700 | 3.84356200  | 4.39053900  |
| N | -8.90664300 | -1.04034900 | 3.83268300  |
| N | -9.54157500 | -5.24751600 | 0.65738500  |
| N | -9.12284700 | -7.18558000 | -4.29266200 |
| C | 8.40481000  | -7.40416800 | 7.20343000  |
| H | 7.74494300  | -6.61612700 | 7.57747100  |
| H | 8.05303800  | -8.35982800 | 7.60165700  |
| H | 9.42048400  | -7.22029500 | 7.59789600  |
| C | 8.93511400  | -8.65078200 | 5.18184200  |
| H | 8.74027400  | -8.70126700 | 4.10977300  |
| H | 10.02634200 | -8.71541800 | 5.33533600  |
| H | 8.47186900  | -9.52685600 | 5.64585800  |
| C | 10.52939700 | -6.75253400 | 1.02475700  |
| H | 11.30569200 | -6.40399800 | 0.32225500  |
| H | 10.73359400 | -6.32944000 | 2.00909000  |
| H | 10.60278200 | -7.84265800 | 1.10048400  |
| C | 8.80922900  | -7.04692000 | -0.65735600 |
| H | 7.77672700  | -6.80101900 | -0.91660800 |
| H | 9.45636000  | -6.77546400 | -1.51068000 |
| H | 8.87969900  | -8.13082400 | -0.52068500 |
| C | 10.53706000 | -2.73965000 | -2.90069300 |
| H | 11.09216100 | -1.86483900 | -3.28008000 |
| H | 10.69440500 | -2.81194600 | -1.82365600 |
| H | 10.95418400 | -3.63814500 | -3.36762200 |
| C | 8.83792200  | -2.68890000 | -4.62943100 |
| H | 7.76000200  | -2.68285900 | -4.80760800 |
| H | 9.28672200  | -1.84294200 | -5.18007000 |
| H | 9.25013600  | -3.61225800 | -5.04887000 |

|   |              |             |             |
|---|--------------|-------------|-------------|
| C | 9.08885600   | 2.45564000  | -4.17196900 |
| H | 9.34188300   | 3.51235200  | -3.98114300 |
| H | 9.31620000   | 1.87587400  | -3.27647500 |
| H | 9.72655000   | 2.09232400  | -4.98467500 |
| C | 7.36593500   | 2.93620400  | -5.80738500 |
| H | 6.32777800   | 2.73503400  | -6.08198700 |
| H | 7.51499900   | 4.03051200  | -5.78565200 |
| H | 8.01349800   | 2.52964900  | -6.59077100 |
| C | 6.03057100   | 6.90386800  | -2.83227700 |
| H | 5.96343500   | 7.74267000  | -2.11886100 |
| H | 6.48526200   | 6.05159800  | -2.32570100 |
| H | 6.69044000   | 7.20465700  | -3.65285300 |
| C | 4.13103300   | 7.60353600  | -4.16552000 |
| H | 3.18634200   | 7.26942500  | -4.60087900 |
| H | 3.94193000   | 8.52485100  | -3.58648400 |
| H | 4.81368100   | 7.86014600  | -4.98187700 |
| C | 1.85381300   | 8.93716900  | 0.24350500  |
| H | 1.57446500   | 9.24418100  | 1.26563900  |
| H | 2.58591600   | 8.13125700  | 0.30960400  |
| H | 2.32904600   | 9.79034000  | -0.25201000 |
| C | -0.25373200  | 9.58891000  | -0.76171000 |
| H | -1.07577400  | 9.24250800  | -1.39246600 |
| H | -0.67931400  | 9.99920600  | 0.17134800  |
| H | 0.25635700   | 10.40695900 | -1.28030400 |
| C | -2.45865700  | 7.79582500  | 3.53541100  |
| H | -2.72816100  | 7.45195600  | 4.54842200  |
| H | -1.51624700  | 7.32758800  | 3.24827800  |
| H | -2.30424800  | 8.87935100  | 3.57175700  |
| C | -4.74321800  | 8.19236100  | 2.82871400  |
| H | -5.47413500  | 7.98241500  | 2.04431800  |
| H | -5.19075300  | 7.92742900  | 3.80303900  |
| H | -4.54722400  | 9.26930400  | 2.83652800  |
| C | -5.88960700  | 3.90526800  | 5.45914100  |
| H | -5.94115900  | 3.03346500  | 6.13314500  |
| H | -4.88668200  | 3.95758600  | 5.03362800  |
| H | -6.05472100  | 4.80882800  | 6.05530900  |
| C | -8.25096000  | 3.89475100  | 4.91118100  |
| H | -8.96619600  | 3.90462900  | 4.08537700  |
| H | -8.50155300  | 3.05182500  | 5.57957400  |
| H | -8.37509200  | 4.81926600  | 5.48396500  |
| C | -7.86411600  | -1.25058200 | 4.84163100  |
| H | -7.60268200  | -2.31592300 | 4.95781000  |
| H | -6.96280000  | -0.69810900 | 4.57353100  |
| H | -8.21791800  | -0.87761200 | 5.80846900  |
| C | -10.16647100 | -1.66830600 | 4.20902900  |
| H | -10.93161500 | -1.44662400 | 3.46135300  |
| H | -10.09762300 | -2.76467600 | 4.32329500  |
| H | -10.49440800 | -1.25579500 | 5.16847400  |



|                 |              |             |             |
|-----------------|--------------|-------------|-------------|
| C               | -8.39669300  | -5.66412400 | 1.47285500  |
| H               | -7.85491400  | -6.51641900 | 1.02934200  |
| H               | -7.69996000  | -4.83395700 | 1.59531200  |
| H               | -8.75055000  | -5.96238800 | 2.46525400  |
| C               | -10.55436900 | -6.29065600 | 0.56091300  |
| H               | -11.41340800 | -5.92446200 | -0.00625600 |
| H               | -10.19116100 | -7.21842300 | 0.08419400  |
| H               | -10.89357200 | -6.54827400 | 1.56924500  |
| C               | -7.83281500  | -7.55020000 | -3.69919800 |
| H               | -7.07915100  | -7.80967600 | -4.46137400 |
| H               | -7.44919600  | -6.72700600 | -3.09565800 |
| H               | -7.97055100  | -8.41725700 | -3.04489400 |
| C               | -9.73125000  | -8.29800400 | -5.00993000 |
| H               | -9.85847200  | -9.13700600 | -4.31871300 |
| H               | -10.71783800 | -8.00868800 | -5.38009800 |
| H               | -9.12879200  | -8.65835400 | -5.86286400 |
| NO <sub>2</sub> |              |             |             |
| C               | 15.75631300  | -1.43111800 | 1.40965000  |
| C               | 15.49769100  | -2.72708700 | 1.08553500  |
| C               | 14.44185400  | -2.84267300 | 0.13516200  |
| C               | 13.88256600  | -1.63602000 | -0.26779800 |
| S               | 14.71940900  | -0.33680500 | 0.55719200  |
| C               | 12.78806100  | -1.28651800 | -1.16280600 |
| C               | 12.44772600  | -1.78133900 | -2.39624900 |
| C               | 11.35508400  | -1.09575300 | -2.98453300 |
| C               | 10.81668200  | -0.06555600 | -2.21985200 |
| S               | 11.72627600  | 0.04787900  | -0.73148800 |
| C               | 9.69070800   | 0.83945800  | -2.39585800 |
| C               | 9.25351100   | 1.52404100  | -3.50252900 |
| C               | 8.16782600   | 2.39101100  | -3.22282800 |
| C               | 7.72889700   | 2.39032500  | -1.90214100 |
| S               | 8.72666400   | 1.28171500  | -0.99122700 |
| C               | 6.64223100   | 3.05530400  | -1.19929300 |
| C               | 6.17263900   | 4.34260000  | -1.28454600 |
| C               | 5.15210500   | 4.62213900  | -0.34182800 |
| C               | 4.79701500   | 3.56045000  | 0.48531800  |
| S               | 5.79212500   | 2.18438400  | 0.07255600  |
| C               | 3.79366900   | 3.38103700  | 1.52340000  |
| C               | 3.38599400   | 4.21926900  | 2.53129700  |
| C               | 2.44656000   | 3.61743000  | 3.40503900  |
| C               | 2.09339500   | 2.30784400  | 3.09085100  |
| S               | 2.98739900   | 1.82309100  | 1.66923700  |
| C               | 1.15347400   | 1.35170400  | 3.65502100  |
| C               | 0.84797400   | 1.05693100  | 4.96070200  |
| C               | -0.05840500  | -0.02500100 | 5.08630800  |
| C               | -0.48631100  | -0.58728000 | 3.88640400  |
| S               | 0.29329000   | 0.26192900  | 2.57235800  |
| C               | -1.42465800  | -1.64424100 | 3.54305800  |

|   |              |             |             |
|---|--------------|-------------|-------------|
| C | -1.66086300  | -2.86128000 | 4.13333800  |
| C | -2.59504200  | -3.65116100 | 3.41850500  |
| C | -3.11434400  | -3.06522900 | 2.26697900  |
| S | -2.38716100  | -1.48706300 | 2.07699300  |
| C | -4.10871100  | -3.47206700 | 1.28685400  |
| C | -4.34706800  | -4.69287300 | 0.70545300  |
| C | -5.35296200  | -4.64432800 | -0.29127200 |
| C | -5.92688100  | -3.39270200 | -0.49947400 |
| S | -5.15904300  | -2.24966400 | 0.57760500  |
| C | -6.99846400  | -2.90095100 | -1.35061700 |
| C | -7.32288900  | -3.20308800 | -2.65019300 |
| C | -8.38989100  | -2.41686900 | -3.15141800 |
| C | -8.92723900  | -1.49752700 | -2.25389200 |
| S | -8.04562900  | -1.61909900 | -0.74914600 |
| C | -10.03291700 | -0.55499100 | -2.31204800 |
| C | -10.45319100 | 0.27361800  | -3.32295000 |
| C | -11.51858300 | 1.12350700  | -2.93394400 |
| C | -11.96048900 | 0.96584900  | -1.62341400 |
| S | -10.98794800 | -0.26882500 | -0.85978300 |
| C | -13.03474500 | 1.55820500  | -0.84064800 |
| C | -13.47281100 | 2.85998200  | -0.76203100 |
| C | -14.49561800 | 3.01114100  | 0.20788300  |
| C | -14.85220800 | 1.86259900  | 0.86482700  |
| S | -13.92414200 | 0.53713200  | 0.30072300  |
| H | 16.50013600  | -1.04678000 | 2.09311300  |
| H | 16.01164900  | -3.58759700 | 1.48961600  |
| H | 12.94448600  | -2.60722300 | -2.87888300 |
| H | 9.67712600   | 1.42262500  | -4.48833700 |
| H | 6.52867200   | 5.07521200  | -1.99013300 |
| H | 3.73108100   | 5.23226100  | 2.65816700  |
| H | 1.24393900   | 1.58424500  | 5.81292500  |
| H | -1.19624500  | -3.19631300 | 5.04601400  |
| H | -3.83527100  | -5.60372400 | 0.96915400  |
| H | -6.83138900  | -3.95773400 | -3.24186200 |
| H | -10.03108300 | 0.28876600  | -4.31428900 |
| H | -13.08818200 | 3.67278000  | -1.35641300 |
| H | -15.61307900 | 1.75359700  | 1.62302900  |
| N | 13.99761000  | -4.16333000 | -0.27750700 |
| O | 13.23257800  | -4.25749100 | -1.23818100 |
| O | 14.42225500  | -5.11742300 | 0.37506100  |
| N | 10.85605800  | -1.53912400 | -4.27862700 |
| O | 10.02734400  | -0.83748800 | -4.86023300 |
| O | 11.30310100  | -2.59997700 | -4.71026100 |
| N | 7.57431700   | 3.15396800  | -4.31217100 |
| O | 6.76083500   | 4.03646000  | -4.03534700 |
| O | 7.93219400   | 2.86202500  | -5.45140800 |
| N | 4.53077300   | 5.93948400  | -0.34385900 |
| O | 3.76942700   | 6.23065000  | 0.57943000  |

|    |              |             |             |
|----|--------------|-------------|-------------|
| O  | 4.81376100   | 6.68312500  | -1.28091600 |
| N  | 1.89644600   | 4.40572400  | 4.49918300  |
| O  | 1.21601600   | 3.83309800  | 5.35121100  |
| O  | 2.15395700   | 5.60780000  | 4.49884000  |
| N  | -0.50339300  | -0.41890100 | 6.41607700  |
| O  | -1.16845600  | -1.44886300 | 6.53190000  |
| O  | -0.17934800  | 0.31497000  | 7.34766500  |
| N  | -2.97295500  | -4.95152300 | 3.95499700  |
| O  | -3.65875500  | -5.69863100 | 3.25643300  |
| O  | -2.57482100  | -5.21944700 | 5.08693600  |
| N  | -5.73955500  | -5.87849800 | -0.96088400 |
| O  | -6.49691900  | -5.80909000 | -1.92935100 |
| O  | -5.27578300  | -6.92269100 | -0.50663600 |
| N  | -8.86818900  | -2.66154000 | -4.50484300 |
| O  | -9.67579800  | -1.87128600 | -4.99435300 |
| O  | -8.42530100  | -3.65599600 | -5.07670100 |
| N  | -12.09155900 | 2.02976500  | -3.91894500 |
| O  | -12.87354800 | 2.89920400  | -3.53314300 |
| O  | -11.74741100 | 1.86468100  | -5.08811600 |
| N  | -15.12607900 | 4.28963500  | 0.49910700  |
| O  | -16.01707500 | 4.29970700  | 1.34829900  |
| O  | -14.71851500 | 5.26950100  | -0.12196200 |
| OH |              |             |             |
| C  | -3.20995500  | -8.28155600 | -0.54132600 |
| C  | -4.33212400  | -9.05873400 | -0.47893600 |
| C  | -5.52515600  | -8.28627500 | -0.37492300 |
| C  | -5.30935600  | -6.91611300 | -0.35774200 |
| S  | -3.58462400  | -6.59497700 | -0.47595000 |
| C  | -6.29039400  | -5.86372800 | -0.26111200 |
| C  | -7.66583100  | -5.97921000 | -0.19085500 |
| C  | -8.32775900  | -4.73033100 | -0.10467800 |
| C  | -7.48391100  | -3.62753400 | -0.10605200 |
| S  | -5.81541700  | -4.17581300 | -0.21786200 |
| C  | -7.83449500  | -2.23670000 | -0.03052200 |
| C  | -9.09526400  | -1.67028200 | 0.05077600  |
| C  | -9.06967500  | -0.25730300 | 0.11042200  |
| C  | -7.79805900  | 0.30231600  | 0.07686200  |
| S  | -6.60289300  | -0.98560800 | -0.03204700 |
| C  | -7.43341500  | 1.68937500  | 0.11965800  |
| C  | -8.26275600  | 2.79607700  | 0.19901500  |
| C  | -7.55776600  | 4.02149000  | 0.22017000  |
| C  | -6.17463900  | 3.89782800  | 0.15872100  |
| S  | -5.75119100  | 2.19080700  | 0.07158800  |
| C  | -5.18591900  | 4.93691300  | 0.16029600  |
| C  | -5.37557700  | 6.30828900  | 0.21506800  |
| C  | -4.16620900  | 7.04032400  | 0.19670700  |
| C  | -3.01603900  | 6.26263300  | 0.12835800  |
| S  | -3.47162500  | 4.56204600  | 0.08550800  |

|   |              |              |             |
|---|--------------|--------------|-------------|
| C | -1.64884500  | 6.69410900   | 0.09328000  |
| C | -1.15170300  | 7.98737600   | 0.10752500  |
| C | 0.26003300   | 8.04348600   | 0.05973300  |
| C | 0.89076100   | 6.80580100   | 0.00848700  |
| S | -0.32995600  | 5.53614900   | 0.01901000  |
| C | 2.29586700   | 6.52369400   | -0.04562900 |
| C | 3.35316500   | 7.41797500   | -0.09103500 |
| C | 4.61710100   | 6.78664300   | -0.13945800 |
| C | 4.57501600   | 5.39742300   | -0.13252100 |
| S | 2.89517000   | 4.87225000   | -0.06363900 |
| C | 5.67167200   | 4.47362300   | -0.17223300 |
| C | 7.02634800   | 4.74874100   | -0.26336100 |
| C | 7.83281100   | 3.58759100   | -0.28012700 |
| C | 7.13191300   | 2.39025900   | -0.20219700 |
| S | 5.40767900   | 2.73779100   | -0.10607700 |
| C | 7.65259800   | 1.05307600   | -0.19289700 |
| C | 8.97062300   | 0.64278700   | -0.30359600 |
| C | 9.12520800   | -0.76228900  | -0.25561400 |
| C | 7.94182900   | -1.47354300  | -0.10648000 |
| S | 6.59546100   | -0.34060700  | -0.02642500 |
| C | 7.76213700   | -2.89610700  | -0.01958000 |
| C | 8.71942900   | -3.89091100  | -0.10977700 |
| C | 8.18538000   | -5.19605900  | 0.02314200  |
| C | 6.81386000   | -5.24590800  | 0.21820500  |
| S | 6.17519200   | -3.60533900  | 0.23659200  |
| C | 5.97461600   | -6.40554600  | 0.39067400  |
| C | 6.34156600   | -7.73771100  | 0.38482200  |
| C | 5.24183500   | -8.62182700  | 0.58989200  |
| C | 4.04229800   | -7.98181600  | 0.75133700  |
| S | 4.24278700   | -6.25721700  | 0.65428400  |
| H | -2.18120500  | -8.60174400  | -0.62314300 |
| H | -4.31836800  | -10.14343400 | -0.50524300 |
| H | -8.17371100  | -6.93492200  | -0.20283700 |
| H | -10.00147700 | -2.26180500  | 0.06584400  |
| H | -9.34127300  | 2.71526800   | 0.23971600  |
| H | -6.35790100  | 6.75982500   | 0.26593200  |
| H | -1.79267900  | 8.85847400   | 0.15033300  |
| H | 3.21000500   | 8.49079700   | -0.09070900 |
| H | 7.41423200   | 5.75775400   | -0.31706900 |
| H | 9.79083700   | 1.33999300   | -0.41625600 |
| H | 9.76903200   | -3.67876900  | -0.26780100 |
| H | 7.36435900   | -8.06042800  | 0.23829500  |
| H | 3.07217300   | -8.42240000  | 0.92192700  |
| O | 5.34412000   | -9.98678000  | 0.62572500  |
| H | 6.27151500   | -10.22457100 | 0.50334900  |
| O | 8.93937300   | -6.33726900  | -0.03315700 |
| H | 9.86189000   | -6.08663900  | -0.16841200 |
| O | 10.33118800  | -1.40156100  | -0.34634400 |

|     |              |             |             |
|-----|--------------|-------------|-------------|
| H   | 11.02475800  | -0.73517500 | -0.43157000 |
| O   | 9.19758500   | 3.60602200  | -0.36520300 |
| H   | 9.49031000   | 4.52577100  | -0.39411000 |
| O   | 5.80646600   | 7.45878100  | -0.18968700 |
| H   | 5.62423400   | 8.40699500  | -0.17495900 |
| O   | 0.98040300   | 9.20511100  | 0.06263000  |
| H   | 0.36556000   | 9.94816700  | 0.11172200  |
| O   | -4.09649600  | 8.40442000  | 0.24112200  |
| H   | -4.99425000  | 8.75701800  | 0.28894200  |
| O   | -8.15559600  | 5.24794900  | 0.29411200  |
| H   | -9.11262900  | 5.12310200  | 0.32762800  |
| O   | -10.18572700 | 0.52636100  | 0.19426000  |
| H   | -10.96420900 | -0.04496600 | 0.20820200  |
| O   | -9.68381000  | -4.58603600 | -0.02597100 |
| H   | -10.08974500 | -5.46225100 | -0.03372400 |
| O   | -6.78329500  | -8.81339800 | -0.29702200 |
| H   | -6.72179900  | -9.77683500 | -0.31446100 |
| OMe |              |             |             |
| C   | -2.43974400  | -8.09202200 | -1.02719000 |
| C   | -3.46785000  | -8.98075700 | -0.87498100 |
| C   | -4.72415400  | -8.33120300 | -0.68137800 |
| C   | -4.64329200  | -6.94186200 | -0.68600800 |
| S   | -2.97646700  | -6.45259500 | -0.94321100 |
| C   | -5.70646400  | -5.98333500 | -0.51240600 |
| C   | -7.06489700  | -6.21739100 | -0.39317100 |
| C   | -7.82475400  | -5.03024400 | -0.23625100 |
| C   | -7.06869200  | -3.85973100 | -0.23127500 |
| S   | -5.36951900  | -4.26557500 | -0.42260400 |
| C   | -7.51511800  | -2.50175400 | -0.09574600 |
| C   | -8.80987900  | -2.02673900 | 0.04557400  |
| C   | -8.87805700  | -0.61610100 | 0.15298400  |
| C   | -7.64246100  | 0.02840800  | 0.09668500  |
| S   | -6.37147900  | -1.17141600 | -0.09242600 |
| C   | -7.35605600  | 1.43187000  | 0.17074600  |
| C   | -8.23957800  | 2.49027600  | 0.32379700  |
| C   | -7.59871500  | 3.75235300  | 0.35281800  |
| C   | -6.21052700  | 3.69983900  | 0.22562900  |
| S   | -5.70739700  | 2.02314200  | 0.05946900  |
| C   | -5.26676700  | 4.77908700  | 0.21998200  |
| C   | -5.50854500  | 6.14399300  | 0.27924600  |
| C   | -4.32634800  | 6.92209700  | 0.24694900  |
| C   | -3.14705800  | 6.18126400  | 0.16287300  |
| S   | -3.54175800  | 4.46786500  | 0.12824000  |
| C   | -1.79315200  | 6.64889600  | 0.10741300  |
| C   | -1.32524400  | 7.95522900  | 0.11247500  |
| C   | 0.08566600   | 8.04291400  | 0.04116500  |
| C   | 0.74105400   | 6.81268500  | -0.01784700 |
| S   | -0.45167600  | 5.52041800  | 0.01146500  |

|   |              |              |             |
|---|--------------|--------------|-------------|
| C | 2.14788000   | 6.54709800   | -0.09128300 |
| C | 3.19625000   | 7.45062000   | -0.18889700 |
| C | 4.46632800   | 6.82855300   | -0.24434400 |
| C | 4.43261500   | 5.43496900   | -0.19049800 |
| S | 2.76113100   | 4.90200200   | -0.06379300 |
| C | 5.52665700   | 4.50882400   | -0.22607200 |
| C | 6.88290600   | 4.77524300   | -0.34533300 |
| C | 7.68356400   | 3.60786800   | -0.34952500 |
| C | 6.97071600   | 2.41491300   | -0.23168000 |
| S | 5.25322400   | 2.77760500   | -0.11766100 |
| C | 7.47035600   | 1.07071500   | -0.19724800 |
| C | 8.77886700   | 0.63135400   | -0.33112800 |
| C | 8.90736600   | -0.77633800  | -0.24786500 |
| C | 7.70813500   | -1.45738500  | -0.04630800 |
| S | 6.39092200   | -0.29472000  | 0.03674200  |
| C | 7.49026900   | -2.87055800  | 0.08732900  |
| C | 8.41304100   | -3.89931500  | -0.00922700 |
| C | 7.84145500   | -5.18339700  | 0.17891800  |
| C | 6.47200400   | -5.17742300  | 0.42320600  |
| S | 5.89264700   | -3.51767100  | 0.42296800  |
| C | 5.59224000   | -6.29581400  | 0.65553300  |
| C | 5.90932400   | -7.64120100  | 0.72243000  |
| C | 4.77375500   | -8.46905300  | 0.97223000  |
| C | 3.59994200   | -7.76893300  | 1.09539100  |
| S | 3.86742500   | -6.06549600  | 0.90309000  |
| H | -1.39313900  | -8.30791400  | -1.18752500 |
| H | -3.33110500  | -10.05364200 | -0.89952400 |
| H | -7.47681200  | -7.21391500  | -0.42419400 |
| H | -9.66068400  | -2.68959500  | 0.06633500  |
| H | -9.30358900  | 2.33533300   | 0.41002000  |
| H | -6.50928400  | 6.54221600   | 0.33901800  |
| H | -1.99498900  | 8.79921100   | 0.16555500  |
| H | 3.02783700   | 8.51552600   | -0.22183300 |
| H | 7.25954000   | 5.78276000   | -0.42612900 |
| H | 9.59642700   | 1.31792000   | -0.48509600 |
| H | 9.45570000   | -3.71147900  | -0.21162800 |
| H | 6.92032500   | -7.99641900  | 0.59724400  |
| H | 2.61450900   | -8.16234600  | 1.29152100  |
| O | 4.77867000   | -9.83095500  | 1.08969600  |
| O | 8.52150100   | -6.36691100  | 0.13414600  |
| O | 10.07651700  | -1.47307100  | -0.34850400 |
| O | 9.04331600   | 3.57907900   | -0.45501300 |
| O | 5.66287600   | 7.47509700   | -0.34384400 |
| O | 0.80983900   | 9.19810000   | 0.02927600  |
| O | -4.27021000  | 8.28349700   | 0.28870500  |
| O | -8.22165700  | 4.95658900   | 0.49256000  |
| O | -10.01880300 | 0.11499900   | 0.29965000  |
| O | -9.17900500  | -4.96664600  | -0.09927900 |

|    |              |              |             |
|----|--------------|--------------|-------------|
| O  | -5.92459100  | -8.95039800  | -0.50104500 |
| C  | 6.03362600   | -10.48175000 | 0.97707700  |
| H  | 6.48973700   | -10.31909800 | -0.00825900 |
| H  | 6.73558100   | -10.14906000 | 1.75277300  |
| H  | 5.83618100   | -11.54736300 | 1.10731200  |
| C  | 9.91478000   | -6.30629500  | -0.13451100 |
| H  | 10.26879900  | -7.33844500  | -0.13299600 |
| H  | 10.11640300  | -5.85644600  | -1.11451900 |
| H  | 10.44950200  | -5.73971200  | 0.63783200  |
| C  | 11.26752300  | -0.72117800  | -0.53625400 |
| H  | 12.07971200  | -1.44799200  | -0.58680200 |
| H  | 11.23682300  | -0.14711700  | -1.47041200 |
| H  | 11.44617600  | -0.03619500  | 0.30155100  |
| C  | 9.71562400   | 4.82826500   | -0.54202800 |
| H  | 9.41278800   | 5.38561200   | -1.43684400 |
| H  | 9.53178900   | 5.44489500   | 0.34607400  |
| H  | 10.77966200  | 4.59564300   | -0.60573700 |
| C  | 5.63311400   | 8.89538200   | -0.39737300 |
| H  | 5.07884900   | 9.25180300   | -1.27408400 |
| H  | 5.18678000   | 9.32160100   | 0.50924400  |
| H  | 6.67280300   | 9.21728700   | -0.47283300 |
| C  | 0.08831100   | 10.41998400  | 0.11595200  |
| H  | -0.59003600  | 10.54626200  | -0.73653200 |
| H  | -0.48742700  | 10.47993900  | 1.04736500  |
| H  | 0.83594900   | 11.21437900  | 0.10230100  |
| C  | -5.50492300  | 8.98430800   | 0.36577400  |
| H  | -6.13594800  | 8.78069600   | -0.50772300 |
| H  | -6.05624800  | 8.72553000   | 1.27779900  |
| H  | -5.25005200  | 10.04483200  | 0.38732800  |
| C  | -9.63548200  | 4.94519100   | 0.64442900  |
| H  | -10.12939500 | 4.51297300   | -0.23422700 |
| H  | -9.93726600  | 4.38775200   | 1.53929500  |
| H  | -9.93675600  | 5.98829600   | 0.75045900  |
| C  | -11.24838600 | -0.59795900  | 0.34837500  |
| H  | -11.27710500 | -1.28842800  | 1.19987200  |
| H  | -12.02950200 | 0.15416300   | 0.46727700  |
| H  | -11.42283400 | -1.15865800  | -0.57780800 |
| C  | -9.89461200  | -6.19594600  | -0.10839700 |
| H  | -9.58385300  | -6.84616900  | 0.71813900  |
| H  | -10.94636000 | -5.93418100  | 0.01476400  |
| H  | -9.76259900  | -6.72890400  | -1.05764000 |
| C  | -5.92734700  | -10.37232100 | -0.46104100 |
| H  | -5.30458800  | -10.75144900 | 0.35818700  |
| H  | -6.96335400  | -10.66805000 | -0.29116400 |
| H  | -5.58102000  | -10.80122100 | -1.40927300 |
| Ph |              |              |             |
| C  | -16.83561000 | 0.78775300   | -2.86487300 |
| C  | -16.47189600 | 0.07908200   | -3.97264100 |

|   |              |             |             |
|---|--------------|-------------|-------------|
| C | -15.32007100 | -0.75323300 | -3.77788600 |
| C | -14.83189600 | -0.66748200 | -2.48104700 |
| S | -15.79744500 | 0.44570000  | -1.52445900 |
| C | -13.74894600 | -1.40434300 | -1.84467000 |
| C | -13.39617700 | -2.72323300 | -2.00665100 |
| C | -12.26617800 | -3.13885000 | -1.23933300 |
| C | -11.76142400 | -2.11207000 | -0.44993400 |
| S | -12.67748800 | -0.63465800 | -0.69142500 |
| C | -10.69690800 | -2.13877400 | 0.54059900  |
| C | -10.35837100 | -3.14689500 | 1.41352000  |
| C | -9.24516400  | -2.85788800 | 2.25838900  |
| C | -8.73775400  | -1.58175700 | 2.04128200  |
| S | -9.63141200  | -0.76583700 | 0.77023500  |
| C | -7.68595400  | -0.86726500 | 2.74657700  |
| C | -7.36678200  | -0.90512000 | 4.08450300  |
| C | -6.26129200  | -0.08437800 | 4.45921700  |
| C | -5.73953900  | 0.61999900  | 3.37993100  |
| S | -6.61084200  | 0.23337000  | 1.90637600  |
| C | -4.69012100  | 1.62559900  | 3.34608000  |
| C | -4.38117100  | 2.58036300  | 4.28765900  |
| C | -3.27652100  | 3.41795400  | 3.95002700  |
| C | -2.74516800  | 3.11047500  | 2.70236900  |
| S | -3.60568900  | 1.76461500  | 1.97566700  |
| C | -1.69350200  | 3.77520900  | 1.95030200  |
| C | -1.38634500  | 5.11566300  | 1.89916900  |
| C | -0.27854700  | 5.44408600  | 1.06215100  |
| C | 0.25786900   | 4.32438700  | 0.43586500  |
| S | -0.60258200  | 2.87229300  | 0.91683400  |
| C | 1.31363000   | 4.23174100  | -0.55909500 |
| C | 1.62450000   | 5.11204900  | -1.57012900 |
| C | 2.73508900   | 4.72658600  | -2.37857200 |
| C | 3.26975700   | 3.50319100  | -1.98958800 |
| S | 2.40427200   | 2.85983000  | -0.60494500 |
| C | 4.32677600   | 2.71401200  | -2.60049300 |
| C | 4.64289300   | 2.58208300  | -3.93330400 |
| C | 5.75257800   | 1.72687900  | -4.20323000 |
| C | 6.28162700   | 1.16959600  | -3.04425900 |
| S | 5.41186100   | 1.73742900  | -1.62962300 |
| C | 7.33596400   | 0.18133000  | -2.88482900 |
| C | 7.64741800   | -0.88460600 | -3.69737000 |
| C | 8.75624100   | -1.66796100 | -3.25772600 |
| C | 9.28875600   | -1.20112000 | -2.06130100 |
| S | 8.42392800   | 0.22322900  | -1.51063200 |
| C | 10.34399800  | -1.76060200 | -1.23181100 |
| C | 10.64725400  | -3.08207700 | -0.99955000 |
| C | 11.76145800  | -3.29683100 | -0.13310600 |
| C | 12.30642000  | -2.10451700 | 0.32750000  |
| S | 11.44623300  | -0.72904200 | -0.33996000 |



|   |              |             |             |
|---|--------------|-------------|-------------|
| C | 13.37418600  | -1.87909500 | 1.29150200  |
| C | 13.65747500  | -2.57855400 | 2.44023400  |
| C | 14.79103500  | -2.08640800 | 3.16538800  |
| C | 15.35106500  | -0.99349600 | 2.54298400  |
| S | 14.52879000  | -0.56925500 | 1.08290700  |
| H | -17.64037800 | 1.50197000  | -2.76087600 |
| H | -16.97564500 | 0.16461000  | -4.92849400 |
| H | -13.91794100 | -3.38560700 | -2.68594700 |
| H | -10.87950600 | -4.09554400 | 1.43750200  |
| H | -7.89694500  | -1.52991400 | 4.79204200  |
| H | -4.91835400  | 2.67073100  | 5.22323500  |
| H | -1.92739500  | 5.85920200  | 2.47043700  |
| H | 1.08400100   | 6.03748200  | -1.72297900 |
| H | 4.10704100   | 3.10724300  | -4.71365200 |
| H | 7.10883000   | -1.09594700 | -4.61238100 |
| H | 10.09915800  | -3.89461600 | -1.45936500 |
| H | 13.07575500  | -3.43709200 | 2.75061700  |
| H | 16.17992000  | -0.39043600 | 2.88587700  |
| C | 15.28408400  | -2.66777400 | 4.43251200  |
| C | 16.64865100  | -2.62566900 | 4.76525200  |
| C | 14.39783600  | -3.27294900 | 5.33931500  |
| C | 17.10913500  | -3.15990700 | 5.96669600  |
| H | 17.35479100  | -2.19121100 | 4.06382600  |
| C | 14.85984100  | -3.81286800 | 6.53831900  |
| H | 13.33641200  | -3.30099800 | 5.11276300  |
| C | 16.21695300  | -3.75720200 | 6.85911300  |
| H | 18.16903200  | -3.11966100 | 6.20124600  |
| H | 14.15586300  | -4.27190000 | 7.22650400  |
| H | 16.57651000  | -4.17781200 | 7.79349500  |
| C | 12.24857800  | -4.66311800 | 0.18223400  |
| C | 13.60856100  | -4.99931100 | 0.07973100  |
| C | 11.33635700  | -5.66767100 | 0.54412400  |
| C | 14.04134800  | -6.29766600 | 0.34031600  |
| H | 14.32379600  | -4.23833100 | -0.21435100 |
| C | 11.77081200  | -6.96739500 | 0.80405000  |
| H | 10.28208100  | -5.42205200 | 0.63331900  |
| C | 13.12511700  | -7.28698000 | 0.70443000  |
| H | 15.09666900  | -6.53925900 | 0.25233700  |
| H | 11.04972500  | -7.72889300 | 1.08697900  |
| H | 13.46467900  | -8.29859700 | 0.90634000  |
| C | 9.25391000   | -2.82162100 | -4.04819400 |
| C | 10.61565800  | -2.96062900 | -4.36367100 |
| C | 8.35094300   | -3.77611200 | -4.54381200 |
| C | 11.05936200  | -4.02697700 | -5.14264800 |
| H | 11.32352400  | -2.22214800 | -4.00190800 |
| C | 8.79646800   | -4.84308700 | -5.32402900 |
| H | 7.29553700   | -3.68518100 | -4.30379900 |
| C | 10.15240600  | -4.97324300 | -5.62515500 |

|   |             |             |             |
|---|-------------|-------------|-------------|
| H | 12.11572600 | -4.11562800 | -5.37928400 |
| H | 8.08275100  | -5.57366200 | -5.69378600 |
| H | 10.50045100 | -5.80346700 | -6.23260700 |
| C | 6.25465800  | 1.52031200  | -5.58479100 |
| C | 7.61713300  | 1.65799900  | -5.89760600 |
| C | 5.35471800  | 1.23257700  | -6.62373100 |
| C | 8.06456600  | 1.50276600  | -7.20778700 |
| H | 8.32251600  | 1.89632500  | -5.10832400 |
| C | 5.80395400  | 1.07793500  | -7.93518800 |
| H | 4.29876900  | 1.11794400  | -6.39656800 |
| C | 7.16059700  | 1.21114900  | -8.23183200 |
| H | 9.12146100  | 1.61646500  | -7.43091600 |
| H | 5.09259300  | 0.85070600  | -8.72397400 |
| H | 7.51151600  | 1.09117900  | -9.25254800 |
| C | 3.23263700  | 5.59212000  | -3.47717500 |
| C | 4.59289700  | 5.92434200  | -3.58909200 |
| C | 2.33047900  | 6.14222200  | -4.40211300 |
| C | 5.03617600  | 6.77255600  | -4.60146800 |
| H | 5.29979500  | 5.52059400  | -2.87172400 |
| C | 2.77558600  | 6.99178600  | -5.41498100 |
| H | 1.27622200  | 5.89063000  | -4.33135500 |
| C | 4.13015100  | 7.30886000  | -5.51925100 |
| H | 6.09133500  | 7.02096600  | -4.66976400 |
| H | 2.06267000  | 7.40322200  | -6.12372000 |
| H | 4.47785000  | 7.97023300  | -6.30734100 |
| C | 0.21378600  | 6.83910200  | 0.93887400  |
| C | 1.57316100  | 7.15353300  | 1.10123700  |
| C | -0.69304900 | 7.88615500  | 0.70790000  |
| C | 2.01102500  | 8.47388100  | 1.02479000  |
| H | 2.28363300  | 6.35710500  | 1.29690100  |
| C | -0.25335800 | 9.20773900  | 0.63196700  |
| H | -1.74667800 | 7.65803800  | 0.57522600  |
| C | 1.10034700  | 9.50627000  | 0.78877700  |
| H | 3.06558900  | 8.69800700  | 1.15662800  |
| H | -0.96980600 | 10.00307200 | 0.44761200  |
| H | 1.44382100  | 10.53485300 | 0.73014800  |
| C | -2.78156300 | 4.46260800  | 4.88130800  |
| C | -1.42075500 | 4.56116800  | 5.21527900  |
| C | -3.68669600 | 5.34634300  | 5.49098500  |
| C | -0.97984900 | 5.52107700  | 6.12364900  |
| H | -0.71144200 | 3.87443800  | 4.76511400  |
| C | -3.24396500 | 6.30669700  | 6.40065700  |
| H | -4.74144200 | 5.28564700  | 5.23878000  |
| C | -1.88883300 | 6.39851000  | 6.71918600  |
| H | 0.07582700  | 5.57967000  | 6.37232700  |
| H | -3.95916300 | 6.98444800  | 6.85780800  |
| H | -1.54294300 | 7.14570000  | 7.42732000  |
| C | -5.75613800 | -0.05264200 | 5.85466300  |

|    |              |             |             |
|----|--------------|-------------|-------------|
| C  | -4.39245200  | -0.22462200 | 6.14440100  |
| C  | -6.65416500  | 0.09885900  | 6.92356700  |
| C  | -3.94192900  | -0.23469000 | 7.46268900  |
| H  | -3.68851300  | -0.35991300 | 5.32983700  |
| C  | -6.20180600  | 0.08821700  | 8.24301500  |
| H  | -7.71102800  | 0.23796100  | 6.71506600  |
| C  | -4.84400400  | -0.07713700 | 8.51733700  |
| H  | -2.88419400  | -0.37267600 | 7.66729800  |
| H  | -6.91160600  | 0.21198600  | 9.05585700  |
| H  | -4.49071700  | -0.08575200 | 9.54422700  |
| C  | -8.71867300  | -3.85970900 | 3.21890200  |
| C  | -7.35045700  | -4.17282500 | 3.27459700  |
| C  | -9.60014200  | -4.55693300 | 4.06092400  |
| C  | -6.87951500  | -5.14654000 | 4.15263900  |
| H  | -6.65900500  | -3.65463100 | 2.61834000  |
| C  | -9.12733700  | -5.53185200 | 4.93938500  |
| H  | -10.66026700 | -4.32206600 | 4.03320300  |
| C  | -7.76523600  | -5.82924800 | 4.98946600  |
| H  | -5.81856000  | -5.37764600 | 4.17871000  |
| H  | -9.82457600  | -6.05653800 | 5.58623700  |
| H  | -7.39602200  | -6.58824300 | 5.67283700  |
| C  | -11.72354100 | -4.51669400 | -1.33940100 |
| C  | -10.35453200 | -4.75201500 | -1.54808100 |
| C  | -12.59076800 | -5.61953100 | -1.27856200 |
| C  | -9.86894200  | -6.05090300 | -1.68143500 |
| H  | -9.67412400  | -3.90949700 | -1.61491900 |
| C  | -12.10335200 | -6.91949600 | -1.41265500 |
| H  | -13.65132600 | -5.45404500 | -1.11238600 |
| C  | -10.74052500 | -7.14009000 | -1.61308500 |
| H  | -8.80761900  | -6.21269700 | -1.84610700 |
| H  | -12.78977300 | -7.75952800 | -1.35758400 |
| H  | -10.35988900 | -8.15178600 | -1.71776200 |
| C  | -14.74060400 | -1.55377600 | -4.88438400 |
| C  | -13.36605000 | -1.52228600 | -5.17286900 |
| C  | -15.57872500 | -2.32603500 | -5.70535800 |
| C  | -12.84733600 | -2.24913100 | -6.24216700 |
| H  | -12.70774000 | -0.91554900 | -4.55999000 |
| C  | -15.05824000 | -3.05293600 | -6.77600000 |
| H  | -16.64302700 | -2.36576500 | -5.49154400 |
| C  | -13.69027600 | -3.01832300 | -7.04752900 |
| H  | -11.78235700 | -2.20893500 | -6.45166900 |
| H  | -15.72261900 | -3.64851700 | -7.39551800 |
| H  | -13.28361100 | -3.58349600 | -7.88093100 |
| SH |              |             |             |
| C  | -15.33648700 | -1.17405400 | -4.10311800 |
| C  | -14.86257300 | -2.30314800 | -4.70512400 |
| C  | -13.84950400 | -2.96234700 | -3.93927300 |
| C  | -13.57474000 | -2.32416700 | -2.74128600 |

|   |              |             |             |
|---|--------------|-------------|-------------|
| S | -14.59047600 | -0.89805400 | -2.56793000 |
| C | -12.62239000 | -2.68382800 | -1.70970600 |
| C | -12.23424700 | -3.94140400 | -1.30656300 |
| C | -11.24698300 | -3.93923600 | -0.27927600 |
| C | -10.89227000 | -2.66596200 | 0.13700800  |
| S | -11.78242100 | -1.45807300 | -0.78035100 |
| C | -9.94695200  | -2.26523500 | 1.15660700  |
| C | -9.62066000  | -2.91878900 | 2.32455600  |
| C | -8.62322500  | -2.25790100 | 3.09653300  |
| C | -8.19639400  | -1.06441400 | 2.53527800  |
| S | -9.03204900  | -0.77619200 | 1.01501400  |
| C | -7.21820300  | -0.11910800 | 3.02754300  |
| C | -6.90819300  | 0.18737100  | 4.33449400  |
| C | -5.86791600  | 1.14985900  | 4.47047600  |
| C | -5.38992000  | 1.61647200  | 3.25569300  |
| S | -6.23206000  | 0.82691000  | 1.92902400  |
| C | -4.35766700  | 2.59541800  | 2.99358600  |
| C | -4.01343400  | 3.69657800  | 3.74665200  |
| C | -2.92246500  | 4.44112400  | 3.21517200  |
| C | -2.43787200  | 3.92870000  | 2.02157300  |
| S | -3.33984700  | 2.48815000  | 1.56989500  |
| C | -1.35652800  | 4.40972500  | 1.19000500  |
| C | -0.93375500  | 5.70741800  | 1.00113900  |
| C | 0.18953500   | 5.82826000  | 0.13473500  |
| C | 0.62061100   | 4.61442000  | -0.37801000 |
| S | -0.37338000  | 3.30537400  | 0.24733000  |
| C | 1.71168600   | 4.33816800  | -1.28657400 |
| C | 2.21064300   | 5.13554500  | -2.29350500 |
| C | 3.31903400   | 4.56788500  | -2.98358800 |
| C | 3.66075100   | 3.30404700  | -2.52790800 |
| S | 2.60178600   | 2.82931800  | -1.20674000 |
| C | 4.70905700   | 2.41775300  | -2.98420800 |
| C | 5.22227500   | 2.28350300  | -4.25574800 |
| C | 6.27659500   | 1.33173700  | -4.35492800 |
| C | 6.56037300   | 0.69957900  | -3.15441800 |
| S | 5.51529600   | 1.31766500  | -1.88220400 |
| C | 7.54389300   | -0.32181100 | -2.86678600 |
| C | 8.00330500   | -1.32321100 | -3.69369200 |
| C | 9.00317000   | -2.14670400 | -3.10204900 |
| C | 9.29696700   | -1.79893900 | -1.79308100 |
| S | 8.33102400   | -0.41389200 | -1.30258700 |
| C | 10.23672000  | -2.40258900 | -0.87281800 |
| C | 10.61074800  | -3.72458300 | -0.77739000 |
| C | 11.59104100  | -3.97524500 | 0.22579600  |
| C | 11.95325000  | -2.84232200 | 0.93424300  |
| S | 11.07946400  | -1.44243900 | 0.32900100  |
| C | 12.89747200  | -2.70797200 | 2.02581800  |
| C | 13.17043700  | -3.60044100 | 3.03735100  |

|                  |              |             |             |
|------------------|--------------|-------------|-------------|
| C                | 14.18773900  | -3.14699300 | 3.93306900  |
| C                | 14.66404100  | -1.90302600 | 3.61227700  |
| S                | 13.89930500  | -1.26957700 | 2.19408000  |
| H                | -16.09190000 | -0.49287700 | -4.46906200 |
| H                | -15.21172200 | -2.65985900 | -5.66702600 |
| H                | -12.66760300 | -4.84883400 | -1.70841900 |
| H                | -10.10669600 | -3.83164300 | 2.64525600  |
| H                | -7.43501700  | -0.23576000 | 5.18050800  |
| H                | -4.54913700  | 3.99124300  | 4.64024900  |
| H                | -1.43403800  | 6.56118700  | 1.44051600  |
| H                | 1.77487600   | 6.08974000  | -2.56154400 |
| H                | 4.83265600   | 2.82351600  | -5.10949600 |
| H                | 7.61159700   | -1.49270300 | -4.68879100 |
| H                | 10.17142100  | -4.50772900 | -1.38247400 |
| H                | 12.63419900  | -4.53101900 | 3.17356400  |
| H                | 15.42497000  | -1.33368400 | 4.12640100  |
| S                | 14.71484700  | -4.02385700 | 5.39946700  |
| H                | 15.22539000  | -5.10839800 | 4.77734700  |
| S                | 12.27174100  | -5.59172900 | 0.54312900  |
| H                | 12.00003700  | -6.09336400 | -0.67785700 |
| S                | 9.79029300   | -3.49271800 | -3.96481200 |
| H                | 9.50709900   | -3.04294400 | -5.20290900 |
| S                | 7.13788000   | 0.99010900  | -5.87698900 |
| H                | 6.81557400   | 2.15204100  | -6.47806900 |
| S                | 4.17454400   | 5.40570000  | -4.30298100 |
| H                | 3.76380400   | 6.64356600  | -3.96508900 |
| S                | 0.95661000   | 7.38998200  | -0.24861600 |
| H                | 0.47507700   | 8.04431900  | 0.82607800  |
| S                | -2.25582000  | 5.88891400  | 4.01113500  |
| H                | -2.73813600  | 5.60365400  | 5.23630900  |
| S                | -5.25029000  | 1.69642000  | 6.04970200  |
| H                | -5.69697000  | 0.63219200  | 6.74462800  |
| S                | -7.99492900  | -2.90604600 | 4.63243600  |
| H                | -8.38139800  | -4.17742100 | 4.41068000  |
| S                | -10.54679100 | -5.42966700 | 0.40041200  |
| H                | -10.86548500 | -6.21811600 | -0.64462400 |
| S                | -13.01779400 | -4.44256800 | -4.47910100 |
| H                | -13.33127400 | -4.30759400 | -5.78250500 |
| SiH <sub>3</sub> |              |             |             |
| C                | -16.74467400 | 0.75676200  | -2.77844000 |
| C                | -16.31999400 | 0.16357700  | -3.93348500 |
| C                | -15.17392300 | -0.68604900 | -3.77054800 |
| C                | -14.75369000 | -0.72195500 | -2.44812300 |
| S                | -15.76888100 | 0.28660100  | -1.42980400 |
| C                | -13.65349900 | -1.47220000 | -1.86177100 |
| C                | -13.23058400 | -2.74750700 | -2.16553800 |
| C                | -12.09228800 | -3.20026800 | -1.42811300 |
| C                | -11.65701600 | -2.24106100 | -0.52228100 |

|   |              |             |             |
|---|--------------|-------------|-------------|
| S | -12.63902900 | -0.78943100 | -0.60796100 |
| C | -10.56139200 | -2.31798400 | 0.42939300  |
| C | -10.13568900 | -3.40833100 | 1.15730000  |
| C | -9.00507800  | -3.17089600 | 1.99858300  |
| C | -8.57795200  | -1.85099100 | 1.91887100  |
| S | -9.55890100  | -0.92849900 | 0.79423700  |
| C | -7.49009800  | -1.20203000 | 2.63075700  |
| C | -7.07104100  | -1.41306200 | 3.92688600  |
| C | -5.94680400  | -0.63098400 | 4.33485900  |
| C | -5.51788900  | 0.21454100  | 3.31880100  |
| S | -6.48964300  | 0.01899000  | 1.87119900  |
| C | -4.43382300  | 1.18183000  | 3.33679700  |
| C | -4.02162200  | 1.98420000  | 4.37915700  |
| C | -2.89846000  | 2.81977900  | 4.09255300  |
| C | -2.46321600  | 2.65783500  | 2.78270200  |
| S | -3.42846800  | 1.46607200  | 1.93073700  |
| C | -1.37642800  | 3.33378600  | 2.09486400  |
| C | -0.96520400  | 4.64298900  | 2.22560700  |
| C | 0.16164500   | 5.00652100  | 1.42565400  |
| C | 0.60090300   | 3.94097300  | 0.64904500  |
| S | -0.36546800  | 2.50385900  | 0.92969800  |
| C | 1.69154800   | 3.90223200  | -0.31007100 |
| C | 2.10817500   | 4.89429500  | -1.17173300 |
| C | 3.23705800   | 4.55875300  | -1.98091500 |
| C | 3.67229400   | 3.26161400  | -1.73677600 |
| S | 2.70002600   | 2.48275900  | -0.50143900 |
| C | 4.76279700   | 2.53394200  | -2.36313800 |
| C | 5.18232600   | 2.58497800  | -3.67523600 |
| C | 6.30900800   | 1.76182100  | -3.98304700 |
| C | 6.73956200   | 1.04928300  | -2.87022200 |
| S | 5.76567500   | 1.41839000  | -1.45843700 |
| C | 7.82584300   | 0.08977700  | -2.76803200 |
| C | 8.24091100   | -0.83381700 | -3.70323600 |
| C | 9.36460200   | -1.62627200 | -3.31415600 |
| C | 9.79721600   | -1.30417100 | -2.03348100 |
| S | 8.82905900   | -0.01803100 | -1.33602500 |
| C | 10.88235200  | -1.89025600 | -1.26465700 |
| C | 11.28843100  | -3.20669200 | -1.22649100 |
| C | 12.41454500  | -3.46760000 | -0.38542700 |
| C | 12.85693100  | -2.31349100 | 0.24730300  |
| S | 11.89684200  | -0.92109300 | -0.21544300 |
| C | 13.94860200  | -2.15816900 | 1.19701400  |
| C | 14.32172700  | -3.00942000 | 2.21273400  |
| C | 15.45756700  | -2.56878600 | 2.96957100  |
| C | 15.92212400  | -1.36057300 | 2.50430700  |
| S | 15.01528300  | -0.76325800 | 1.15569500  |
| H | -17.56742100 | 1.44445000  | -2.63998400 |
| H | -16.79691900 | 0.33930300  | -4.89145600 |

|    |              |             |             |
|----|--------------|-------------|-------------|
| H  | -13.74246100 | -3.36246800 | -2.89708400 |
| H  | -10.64114700 | -4.36596500 | 1.10657600  |
| H  | -7.57714100  | -2.10667700 | 4.58859700  |
| H  | -4.53172100  | 1.99102500  | 5.33565400  |
| H  | -1.47852400  | 5.34465900  | 2.87313100  |
| H  | 1.59722600   | 5.84789700  | -1.24044800 |
| H  | 4.67482500   | 3.18994200  | -4.41792500 |
| H  | 7.73234500   | -0.95926300 | -4.65234700 |
| H  | 10.77222900  | -3.98404900 | -1.77826600 |
| H  | 13.76464900  | -3.91193700 | 2.43852200  |
| H  | 16.75580700  | -0.78042200 | 2.87722400  |
| Si | 16.22890400  | -3.47179500 | 4.41898600  |
| H  | 16.74213900  | -4.80593200 | 4.00935500  |
| H  | 17.35731900  | -2.65459200 | 4.93454500  |
| H  | 15.23856300  | -3.67838800 | 5.50882000  |
| Si | 13.19292800  | -5.17438100 | -0.27135700 |
| H  | 14.66942500  | -5.09809300 | -0.39616200 |
| H  | 12.86667400  | -5.86346100 | 1.00640500  |
| H  | 12.63922700  | -5.98872700 | -1.38423100 |
| Si | 10.15063300  | -2.86553700 | -4.48813800 |
| H  | 11.62727100  | -2.72079300 | -4.50720600 |
| H  | 9.82396000   | -4.27237200 | -4.13065800 |
| H  | 9.60448800   | -2.59862300 | -5.84393200 |
| Si | 7.10064200   | 1.77290700  | -5.68745700 |
| H  | 8.57647700   | 1.89161400  | -5.58967000 |
| H  | 6.78190400   | 0.54795700  | -6.46957100 |
| H  | 6.55208900   | 2.94173700  | -6.42271700 |
| Si | 4.02499600   | 5.81153900  | -3.13918100 |
| H  | 5.50055900   | 5.82886200  | -2.98337700 |
| H  | 3.70978300   | 5.54063000  | -4.56782100 |
| H  | 3.46957000   | 7.14516900  | -2.79210800 |
| Si | 0.94195500   | 6.71212700  | 1.54307100  |
| H  | 2.41782400   | 6.61702100  | 1.66352600  |
| H  | 0.62398700   | 7.56443400  | 0.36564400  |
| H  | 0.38254700   | 7.37199700  | 2.75103500  |
| Si | -2.11672400  | 3.90440200  | 5.41326100  |
| H  | -0.64028300  | 3.75638500  | 5.42140700  |
| H  | -2.44001100  | 5.34509700  | 5.22951700  |
| H  | -2.66995600  | 3.47395000  | 6.72328300  |
| Si | -5.15734100  | -0.85073900 | 6.02601700  |
| H  | -3.68106500  | -0.95337600 | 5.91728700  |
| H  | -5.48013200  | 0.26766500  | 6.95282200  |
| H  | -5.70441400  | -2.10247100 | 6.61039700  |
| Si | -8.20633400  | -4.55512100 | 2.98705700  |
| H  | -6.73107600  | -4.54419100 | 2.82723500  |
| H  | -8.51817700  | -4.46933000 | 4.43950400  |
| H  | -8.75507100  | -5.83783400 | 2.47603300  |
| Si | -11.29702900 | -4.86753700 | -1.77071200 |

|     |              |             |             |
|-----|--------------|-------------|-------------|
| H   | -9.82212400  | -4.74527300 | -1.87968700 |
| H   | -11.60384900 | -5.87131800 | -0.71571100 |
| H   | -11.85284000 | -5.36927200 | -3.05416500 |
| Si  | -14.34385800 | -1.52306800 | -5.23123600 |
| H   | -12.86994500 | -1.35473200 | -5.18484900 |
| H   | -14.64191900 | -2.97982600 | -5.29982600 |
| H   | -14.87617100 | -0.89287800 | -6.46801000 |
| SMe |              |             |             |
| C   | -15.10147800 | -1.22968600 | -4.03315600 |
| C   | -14.58298100 | -2.29421600 | -4.70851700 |
| C   | -13.54073300 | -2.96845700 | -3.99248700 |
| C   | -13.28956000 | -2.40339700 | -2.74968100 |
| S   | -14.36401300 | -1.03820900 | -2.47745100 |
| C   | -12.32255000 | -2.77314000 | -1.73183200 |
| C   | -11.88008700 | -4.02326100 | -1.37166300 |
| C   | -10.90566100 | -4.02144600 | -0.32969300 |
| C   | -10.61601800 | -2.74750100 | 0.14244800  |
| S   | -11.55902200 | -1.54866900 | -0.73049200 |
| C   | -9.69775400  | -2.32434300 | 1.18017100  |
| C   | -9.33558500  | -2.97746000 | 2.33534200  |
| C   | -8.38571100  | -2.27388700 | 3.13262000  |
| C   | -8.03336700  | -1.04049500 | 2.59909500  |
| S   | -8.88494100  | -0.76878300 | 1.08627500  |
| C   | -7.11350700  | -0.03815400 | 3.09766600  |
| C   | -6.83035300  | 0.30338100  | 4.39944100  |
| C   | -5.85113900  | 1.33033600  | 4.53561400  |
| C   | -5.39309500  | 1.81189500  | 3.31498800  |
| S   | -6.18659900  | 0.96678900  | 1.99398400  |
| C   | -4.40815400  | 2.83406700  | 3.02634900  |
| C   | -4.10362100  | 3.96970800  | 3.74059500  |
| C   | -3.05396200  | 4.75229400  | 3.17655300  |
| C   | -2.56142100  | 4.22779600  | 1.98729200  |
| S   | -3.41161900  | 2.74337100  | 1.58229000  |
| C   | -1.50610900  | 4.70953900  | 1.12098400  |
| C   | -1.09889900  | 6.00194300  | 0.88132200  |
| C   | -0.00362300  | 6.11293600  | -0.02439300 |
| C   | 0.42276000   | 4.88612200  | -0.51926800 |
| S   | -0.54675600  | 3.58943200  | 0.16465400  |
| C   | 1.49090400   | 4.56844700  | -1.44474500 |
| C   | 1.98939900   | 5.31573300  | -2.48723100 |
| C   | 3.06247700   | 4.69584700  | -3.19128100 |
| C   | 3.37623500   | 3.43199700  | -2.70564100 |
| S   | 2.33140900   | 3.02743200  | -1.35193200 |
| C   | 4.38445200   | 2.48855800  | -3.14257000 |
| C   | 4.88143900   | 2.27704700  | -4.40789400 |
| C   | 5.88778000   | 1.27017600  | -4.48138400 |
| C   | 6.14890600   | 0.66912600  | -3.25600200 |
| S   | 5.13846600   | 1.38042000  | -2.00575000 |



|   |              |             |             |
|---|--------------|-------------|-------------|
| C | 7.08316400   | -0.38334300 | -2.91286200 |
| C | 7.50916600   | -1.44571600 | -3.67586600 |
| C | 8.45379500   | -2.29248100 | -3.02513500 |
| C | 8.73763200   | -1.89515500 | -1.72436700 |
| S | 7.82649300   | -0.44739000 | -1.32142200 |
| C | 9.62851500   | -2.48016900 | -0.74267400 |
| C | 9.95031000   | -3.80270500 | -0.54614900 |
| C | 10.88410600  | -4.02731400 | 0.50851700  |
| C | 11.26202400  | -2.86063800 | 1.15881400  |
| S | 10.45570900  | -1.47558000 | 0.43877200  |
| C | 12.17379600  | -2.66645400 | 2.27050400  |
| C | 12.40295000  | -3.48186200 | 3.35418300  |
| C | 13.39089400  | -2.97220000 | 4.25488900  |
| C | 13.89205000  | -1.75900400 | 3.85655800  |
| S | 13.18346500  | -1.22446300 | 2.37043700  |
| H | -15.89003900 | -0.55842700 | -4.34342300 |
| H | -14.92372100 | -2.60692000 | -5.68835100 |
| H | -12.25751400 | -4.92978000 | -1.82422000 |
| H | -9.75584900  | -3.92928300 | 2.62939100  |
| H | -7.32871900  | -0.14923900 | 5.24534000  |
| H | -4.63353400  | 4.25518300  | 4.63843300  |
| H | -1.58520600  | 6.86284400  | 1.31863400  |
| H | 1.58414800   | 6.27882400  | -2.76368300 |
| H | 4.51905900   | 2.80798800  | -5.27709300 |
| H | 7.13777900   | -1.63853700 | -4.67271100 |
| H | 9.51106200   | -4.60437900 | -1.12325500 |
| H | 11.85967900  | -4.40046900 | 3.53005400  |
| H | 14.63694300  | -1.15670000 | 4.35673700  |
| S | 13.86312900  | -3.75852800 | 5.78326800  |
| S | 11.45871500  | -5.65468900 | 0.94709900  |
| S | 9.15068800   | -3.72504100 | -3.82142900 |
| S | 6.68175900   | 0.83402800  | -6.01486400 |
| S | 3.87337100   | 5.47866500  | -4.57005000 |
| S | 0.69431800   | 7.68923900  | -0.47310400 |
| S | -2.48255900  | 6.26291600  | 3.92477000  |
| S | -5.32010700  | 1.93147800  | 6.12527200  |
| S | -7.76014600  | -2.93333000 | 4.66442900  |
| S | -10.18187000 | -5.52019100 | 0.30232000  |
| S | -12.69467200 | -4.39157400 | -4.64991100 |
| C | 14.76930600  | -5.22423300 | 5.15113200  |
| H | 14.12908500  | -5.83386900 | 4.51074300  |
| H | 15.66476700  | -4.92249300 | 4.60457000  |
| H | 15.05901500  | -5.80854100 | 6.02753500  |
| C | 12.07104800  | -6.26203000 | -0.67158000 |
| H | 11.27315300  | -6.29835700 | -1.41523200 |
| H | 12.89088500  | -5.63880500 | -1.03240800 |
| H | 12.43695000  | -7.27568900 | -0.49292400 |
| C | 9.88770700   | -2.97015400 | -5.32218200 |

|             |              |             |             |
|-------------|--------------|-------------|-------------|
| H           | 9.13160800   | -2.46798400 | -5.92802500 |
| H           | 10.67815800  | -2.26813800 | -5.05186200 |
| H           | 10.31492600  | -3.79539200 | -5.89642700 |
| C           | 7.33937600   | 2.46223100  | -6.54610400 |
| H           | 6.53964500   | 3.19488600  | -6.66625500 |
| H           | 8.08007200   | 2.82944000  | -5.83391300 |
| H           | 7.81721200   | 2.29354600  | -7.51382600 |
| C           | 4.38319300   | 7.07426500  | -3.82256300 |
| H           | 3.52213300   | 7.64161100  | -3.46566400 |
| H           | 5.08817700   | 6.90931700  | -3.00622700 |
| H           | 4.87471000   | 7.63650400  | -4.61976700 |
| C           | 1.20443300   | 8.32807100  | 1.16934700  |
| H           | 0.35418400   | 8.39571600  | 1.85001200  |
| H           | 1.98295800   | 7.69856100  | 1.60333600  |
| H           | 1.60235600   | 9.33016000  | 0.99393800  |
| C           | -2.14854600  | 5.71107500  | 5.64135500  |
| H           | -3.05399700  | 5.34774700  | 6.12990000  |
| H           | -1.37881500  | 4.93790800  | 5.65499300  |
| H           | -1.78708300  | 6.59350000  | 6.17415600  |
| C           | -4.76291800  | 0.37705500  | 6.92460600  |
| H           | -5.57607300  | -0.34663800 | 7.00161200  |
| H           | -3.92445700  | -0.05758800 | 6.37813100  |
| H           | -4.43712100  | 0.65553300  | 7.92935600  |
| C           | -7.03266300  | -4.51699600 | 4.09024900  |
| H           | -7.78272900  | -5.14719400 | 3.60937600  |
| H           | -6.20278200  | -4.33371500 | 3.40586800  |
| H           | -6.66171500  | -5.02179700 | 4.98511200  |
| C           | -9.55146300  | -6.28870200 | -1.23920800 |
| H           | -10.35745000 | -6.47599700 | -1.95045800 |
| H           | -8.78507100  | -5.66162300 | -1.69747900 |
| H           | -9.11060700  | -7.24256200 | -0.94099900 |
| C           | -11.92518100 | -3.68012500 | -6.15614800 |
| H           | -11.40296600 | -4.50368100 | -6.64845400 |
| H           | -12.67937000 | -3.28062200 | -6.83666400 |
| H           | -11.20741500 | -2.90155200 | -5.89266900 |
| <i>t</i> Bu |              |             |             |
| C           | 20.13371000  | -0.65826700 | 0.05462100  |
| C           | 19.66088100  | -1.68891300 | -0.70083500 |
| C           | 18.28523400  | -1.55494300 | -1.10667300 |
| C           | 17.73816200  | -0.37815100 | -0.62685400 |
| S           | 18.91701300  | 0.53812200  | 0.31094500  |
| C           | 16.40643300  | 0.23612500  | -0.74834400 |
| C           | 15.97845200  | 1.15436200  | -1.67249700 |
| C           | 14.63494000  | 1.62628700  | -1.50026200 |
| C           | 14.04840200  | 1.05276300  | -0.38144700 |
| S           | 15.14832700  | -0.05368800 | 0.42321300  |
| C           | 12.72113100  | 1.21954600  | 0.22864200  |
| C           | 12.25747600  | 2.24749500  | 1.01133200  |

|   |              |             |             |
|---|--------------|-------------|-------------|
| C | 10.92038700  | 2.09375900  | 1.50677700  |
| C | 10.37446600  | 0.88653300  | 1.09446800  |
| S | 11.50217400  | -0.02210900 | 0.10354300  |
| C | 9.06747100   | 0.26002400  | 1.34428100  |
| C | 8.63446800   | -0.41097900 | 2.46069300  |
| C | 7.31279400   | -0.96165700 | 2.37843800  |
| C | 6.74806100   | -0.71190100 | 1.13597200  |
| S | 7.83898700   | 0.19917600  | 0.10691600  |
| C | 5.44351400   | -1.06896400 | 0.55896900  |
| C | 5.02773300   | -2.27310900 | 0.04770500  |
| C | 3.69851600   | -2.29064800 | -0.49099400 |
| C | 3.11035100   | -1.03724800 | -0.40085400 |
| S | 4.18863200   | 0.12494500  | 0.35100600  |
| C | 1.79149400   | -0.53571400 | -0.81524700 |
| C | 1.35338400   | -0.19552400 | -2.07090400 |
| C | 0.01795200   | 0.32290800  | -2.14110300 |
| C | -0.55298100  | 0.39522200  | -0.87864000 |
| S | 0.54909500   | -0.18435600 | 0.35782600  |
| C | -1.86811600  | 0.86264700  | -0.41566000 |
| C | -2.31051200  | 2.14951500  | -0.23633300 |
| C | -3.63667700  | 2.28004400  | 0.29439100  |
| C | -4.19438600  | 1.03492400  | 0.54632300  |
| S | -3.09339200  | -0.26118200 | 0.11305500  |
| C | -5.49401800  | 0.63476800  | 1.10524500  |
| C | -5.90712300  | 0.64696700  | 2.41414400  |
| C | -7.23082900  | 0.14770500  | 2.64975800  |
| C | -7.81718700  | -0.28009700 | 1.46720800  |
| S | -6.74412100  | -0.04762200 | 0.09812900  |
| C | -9.13036700  | -0.87552100 | 1.17936100  |
| C | -9.55736500  | -2.16368200 | 1.38569000  |
| C | -10.89298800 | -2.45039300 | 0.94941600  |
| C | -11.47531800 | -1.33311200 | 0.36779200  |
| S | -10.38343400 | 0.04058500  | 0.38313900  |
| C | -12.79808900 | -1.11463500 | -0.23580900 |
| C | -13.26272400 | -1.51148500 | -1.46510800 |
| C | -14.59939500 | -1.10010100 | -1.78320500 |
| C | -15.14228600 | -0.33985900 | -0.75718200 |
| S | -14.01366800 | -0.16118500 | 0.57439600  |
| C | -16.44571000 | 0.32304200  | -0.60681700 |
| C | -16.88951600 | 1.49423900  | -1.16710700 |
| C | -18.20553300 | 1.89689200  | -0.75602200 |
| C | -18.73334900 | 1.00402800  | 0.14124200  |
| S | -17.66131300 | -0.31210500 | 0.49042400  |
| H | 21.12483600  | -0.53569800 | 0.46934800  |
| H | 20.27751700  | -2.53785300 | -0.97128700 |
| H | 16.62751000  | 1.47485600  | -2.47658900 |
| H | 12.88239200  | 3.10102400  | 1.23618200  |
| H | 9.26918300   | -0.51301100 | 3.33021600  |

|   |              |             |             |
|---|--------------|-------------|-------------|
| H | 5.68052200   | -3.13518900 | 0.05235000  |
| H | 1.99498400   | -0.30865700 | -2.93413100 |
| H | -1.67812200  | 2.99375600  | -0.47459600 |
| H | -5.25628000  | 1.00445700  | 3.20020200  |
| H | -8.90849300  | -2.89955700 | 1.84049100  |
| H | -12.64046400 | -2.08671900 | -2.13681200 |
| H | -16.27028400 | 2.06842000  | -1.84629500 |
| H | -19.69778700 | 1.03927800  | 0.62673000  |
| C | 13.98915000  | 2.64881200  | -2.45366100 |
| C | 14.82427400  | 2.79476600  | -3.74466400 |
| H | 15.81913500  | 3.20663200  | -3.54876100 |
| H | 14.94457700  | 1.83625600  | -4.26013700 |
| H | 14.31780400  | 3.48142400  | -4.43029200 |
| C | 17.63899600  | -2.65408900 | -1.96500500 |
| C | 17.67998300  | -3.98580900 | -1.17607100 |
| H | 17.24901100  | -4.79413100 | -1.77729500 |
| H | 18.70114100  | -4.27534400 | -0.91104300 |
| H | 17.10299100  | -3.90781400 | -0.24916900 |
| C | 10.23999700  | 3.15156400  | 2.39602700  |
| C | 11.05757200  | 4.46132000  | 2.41296800  |
| H | 12.04598400  | 4.32421500  | 2.86270800  |
| H | 11.19093200  | 4.87027900  | 1.40613500  |
| H | 10.52992000  | 5.21158200  | 3.01014900  |
| C | 6.66467700   | -1.73354000 | 3.54307000  |
| C | 7.48428800   | -1.55866600 | 4.84026100  |
| H | 8.48634600   | -1.99155800 | 4.75815000  |
| H | 7.58645600   | -0.50441300 | 5.11778300  |
| H | 6.97575600   | -2.07156300 | 5.66268300  |
| C | 3.06511400   | -3.55953500 | -1.09219300 |
| C | 3.91322500   | -4.80587800 | -0.75771500 |
| H | 4.90833900   | -4.76226700 | -1.21143700 |
| H | 4.03248600   | -4.93820500 | 0.32265300  |
| H | 3.41673600   | -5.69912600 | -1.14947000 |
| C | -0.63614100  | 0.74817900  | -3.46898200 |
| C | 0.19424100   | 0.25070000  | -4.67213000 |
| H | 1.18833100   | 0.70763500  | -4.70462300 |
| H | 0.31571400   | -0.83739000 | -4.65981200 |
| H | -0.31650600  | 0.51844900  | -5.60241600 |
| C | -4.29069500  | 3.65031700  | 0.55242300  |
| C | -3.50407700  | 4.77383900  | -0.15798000 |
| H | -2.49209100  | 4.88750200  | 0.24301000  |
| H | -3.42961300  | 4.59790900  | -1.23611600 |
| H | -4.01998900  | 5.72781100  | -0.01039500 |
| C | -7.85918100  | 0.10184000  | 4.05534300  |
| C | -7.02248400  | 0.92842400  | 5.05618700  |
| H | -6.02125800  | 0.51077500  | 5.20168600  |
| H | -6.91799300  | 1.96998200  | 4.73517600  |
| H | -7.51900900  | 0.92878500  | 6.03160300  |

|   |              |             |             |
|---|--------------|-------------|-------------|
| C | -11.53800000 | -3.83897700 | 1.11818500  |
| C | -10.69726300 | -4.72220700 | 2.06602000  |
| H | -9.70444200  | -4.93714400 | 1.65836000  |
| H | -10.57264500 | -4.25874000 | 3.05015800  |
| H | -11.20268800 | -5.68207700 | 2.21158200  |
| C | -15.28563400 | -1.47223700 | -3.11125600 |
| C | -14.48061100 | -2.55793600 | -3.85795100 |
| H | -13.49142000 | -2.20193200 | -4.16250600 |
| H | -14.35038300 | -3.45817400 | -3.24852900 |
| H | -15.01649100 | -2.84618900 | -4.76772900 |
| C | -18.89053500 | 3.16692500  | -1.25865500 |
| C | -19.02459000 | 3.10405000  | -2.79768100 |
| H | -18.04830600 | 3.01917300  | -3.28511300 |
| H | -19.62831600 | 2.24400400  | -3.10458800 |
| H | -19.50753800 | 4.01204800  | -3.17593900 |
| C | 18.45804400  | -2.80997000 | -3.26995200 |
| H | 18.02973300  | -3.60544200 | -3.88987100 |
| H | 18.44570600  | -1.88280500 | -3.85182900 |
| H | 19.50277600  | -3.06768800 | -3.07374500 |
| C | 13.92700400  | 4.03448900  | -1.76790100 |
| H | 13.53277700  | 4.78412600  | -2.46379800 |
| H | 13.27684200  | 4.01548600  | -0.89056900 |
| H | 14.92255600  | 4.35971300  | -1.44844600 |
| C | 10.14507100  | 2.63175700  | 3.84998300  |
| H | 9.72245000   | 3.40558000  | 4.50124500  |
| H | 9.50405300   | 1.75024800  | 3.91553800  |
| H | 11.13370400  | 2.36579900  | 4.23830800  |
| C | 6.61819000   | -3.24419000 | 3.21190700  |
| H | 6.22442100   | -3.80592600 | 4.06684100  |
| H | 5.97370600   | -3.44437600 | 2.35355600  |
| H | 7.61832100   | -3.62880300 | 2.98651500  |
| C | 2.99484300   | -3.43181900 | -2.63240100 |
| H | 2.61016000   | -4.35929600 | -3.07210200 |
| H | 2.33265600   | -2.61748000 | -2.93335000 |
| H | 3.98608500   | -3.24212000 | -3.05727100 |
| C | -0.70861100  | 2.29173700  | -3.54731700 |
| H | -1.11118300  | 2.60180000  | -4.51855600 |
| H | -1.35710600  | 2.69969000  | -2.76926600 |
| H | 0.28431100   | 2.73914000  | -3.43408100 |
| C | -4.28704800  | 3.95324800  | 2.06964300  |
| H | -4.68565700  | 4.95728500  | 2.25587800  |
| H | -4.90476000  | 3.23957300  | 2.61900500  |
| H | -3.27148300  | 3.91163100  | 2.47687300  |
| C | -7.90114900  | -1.35877000 | 4.56422100  |
| H | -8.28023700  | -1.39010800 | 5.59217900  |
| H | -8.55543300  | -1.97674800 | 3.94588600  |
| H | -6.90195100  | -1.80661100 | 4.55872000  |
| C | -11.61537300 | -4.55334500 | -0.25178500 |

|   |              |             |             |
|---|--------------|-------------|-------------|
| H | -12.00718200 | -5.56944400 | -0.12677500 |
| H | -12.27514800 | -4.02173400 | -0.94036700 |
| H | -10.62557200 | -4.62681300 | -0.71413100 |
| C | -15.36797800 | -0.22850500 | -4.02779300 |
| H | -15.78899400 | -0.50360200 | -5.00176800 |
| H | -16.00478600 | 0.54470300  | -3.59337300 |
| H | -14.37508400 | 0.20068100  | -4.19821900 |
| C | -18.03616000 | 4.39597700  | -0.86997700 |
| H | -18.50688700 | 5.31759900  | -1.23031300 |
| H | -17.92863900 | 4.46999700  | 0.21678500  |
| H | -17.03234500 | 4.34343600  | -1.30261800 |
| C | -20.29339400 | 3.32602000  | -0.64581700 |
| H | -20.24894200 | 3.39908700  | 0.44576300  |
| H | -20.76453900 | 4.24022200  | -1.02070400 |
| H | -20.94416600 | 2.48511900  | -0.90743300 |
| C | -16.70559700 | -2.02928800 | -2.86707500 |
| H | -16.67547500 | -2.90988600 | -2.21721100 |
| H | -17.36249800 | -1.29068600 | -2.40537800 |
| H | -17.15534700 | -2.32817200 | -3.82056600 |
| C | -12.95561400 | -3.72545600 | 1.72168900  |
| H | -12.93147500 | -3.21319300 | 2.68898500  |
| H | -13.63769000 | -3.18071200 | 1.06735400  |
| H | -13.37201600 | -4.72637500 | 1.88029800  |
| C | -9.28859700  | 0.68720000  | 4.04740600  |
| H | -9.28785600  | 1.72076700  | 3.68639100  |
| H | -9.96604900  | 0.10938100  | 3.41706400  |
| H | -9.69528800  | 0.68520000  | 5.06484500  |
| C | -5.74107500  | 3.69043800  | 0.02248200  |
| H | -5.77552900  | 3.46667900  | -1.04869500 |
| H | -6.38652300  | 2.97778100  | 0.53775400  |
| H | -6.16169400  | 4.69101400  | 0.17174800  |
| C | -2.05721000  | 0.15789400  | -3.60621100 |
| H | -2.03634700  | -0.93520100 | -3.54877600 |
| H | -2.73100100  | 0.52426000  | -2.83031800 |
| H | -2.48146800  | 0.43700200  | -4.57698800 |
| C | 1.64651000   | -3.79493000 | -0.52842000 |
| H | 1.66588300   | -3.87637900 | 0.56318800  |
| H | 0.96006400   | -2.99020700 | -0.79567100 |
| H | 1.23806800   | -4.72933400 | -0.92931000 |
| C | 5.23414000   | -1.22203300 | 3.82314900  |
| H | 5.23774200   | -0.15193600 | 4.05454100  |
| H | 4.56714300   | -1.38217300 | 2.97482100  |
| H | 4.81287200   | -1.75221700 | 4.68454400  |
| C | 8.82534000   | 3.49021000  | 1.87614000  |
| H | 8.86228700   | 3.85292700  | 0.84373900  |
| H | 8.15881100   | 2.62713000  | 1.90744100  |
| H | 8.38134600   | 4.27794800  | 2.49492500  |
| C | 12.56593100  | 2.21311000  | -2.86613100 |

|   |             |             |             |
|---|-------------|-------------|-------------|
| H | 12.57894900 | 1.22906800  | -3.34581600 |
| H | 11.88770300 | 2.16378800  | -2.01315400 |
| H | 12.15153400 | 2.93205400  | -3.58157300 |
| C | 16.17665500 | -2.37834000 | -2.35679800 |
| H | 15.52397600 | -2.30548700 | -1.48401100 |
| H | 16.07374100 | -1.45609400 | -2.93301900 |
| H | 15.81166300 | -3.20477100 | -2.97632000 |
